# Supplementary material for: The XPO1 Inhibitor KPT-8602 Synergizes with Dexamethasone in Acute Lymphoblastic Leukemia
Source: Oxford University Press journal article supplement (doi:10.1158/1078-0432.ccr-20-1315), 2020-08-21
Supplement: 10780432ccr201315-sup-240891_2_supp_6482931_qxxvxy.xlsx [file 10780432ccr201315-sup-240891_2_supp_6482931_qxxvxy.xlsx]

## Sheet: 697_DE_DEXvsDMSO_24h
Differential expression after 24h dexamethasone treatment compared to DMSO in 697 cell line
	baseMean	log2FoldChange	lfcSE	stat	pvalue	padj
ENSG00000109670-FBXW7	1314.33	1.95516	0.114114	17.1334	8.36599e-66	6.88067e-62
ENSG00000245532-NEAT1	1840.91	2.57177	0.150342	17.1061	1.33748e-65	6.88067e-62
ENSG00000175161-CADM2	194.059	5.37367	0.317292	16.9361	2.43898e-64	8.36488e-61
ENSG00000154359-LONRF1	222.784	2.8547	0.187308	15.2407	1.89899e-52	4.88467e-49
ENSG00000096060-FKBP5	281.548	2.53318	0.170425	14.8639	5.65335e-50	9.69456e-47
ENSG00000100099-HPS4	712.266	1.79131	0.120468	14.8696	5.19082e-50	9.69456e-47
ENSG00000162511-LAPTM5	227.4	2.58786	0.179966	14.3797	6.93843e-47	1.01985e-43
ENSG00000118523-CTGF	142.987	3.24775	0.23855	13.6145	3.28318e-42	4.22258e-39
ENSG00000070214-SLC44A1	174.063	2.86865	0.241038	11.9013	1.16563e-32	1.33258e-29
ENSG00000107104-KANK1	150.213	2.25692	0.196859	11.4646	1.98591e-30	2.0433e-27
ENSG00000120833-SOCS2	86.406	3.31201	0.291757	11.3519	7.25371e-30	6.78486e-27
ENSG00000026297-RNASET2	92.1891	2.94637	0.262394	11.2288	2.94534e-29	2.33112e-26
ENSG00000102024-PLS3	193.84	2.13586	0.190204	11.2293	2.92652e-29	2.33112e-26
ENSG00000100721-TCL1A	365.503	1.50617	0.141842	10.6186	2.44093e-26	1.79391e-23
ENSG00000133639-BTG1	153.345	2.05058	0.196328	10.4447	1.54955e-25	1.06289e-22
ENSG00000204287-HLA-DRA	256.567	1.70073	0.172472	9.86093	6.14794e-23	3.95351e-20
ENSG00000164938-TP53INP1	79.5564	2.50882	0.266562	9.41179	4.87745e-21	2.95201e-18
ENSG00000047365-ARAP2	103.434	2.2232	0.236612	9.39597	5.66921e-21	3.24058e-18
ENSG00000113580-NR3C1	167.542	1.7364	0.184943	9.38882	6.06762e-21	3.28578e-18
ENSG00000115993-TRAK2	91.4111	2.28111	0.244207	9.34085	9.55614e-21	4.91615e-18
ENSG00000185112-FAM43A	78.9337	2.48402	0.276198	8.99363	2.39194e-19	1.17193e-16
ENSG00000132465-JCHAIN	85.5911	-2.43411	0.272648	-8.92764	4.35203e-19	2.03537e-16
ENSG00000123416-TUBA1B	1577.87	-1.09512	0.122918	-8.90934	5.1336e-19	2.2965e-16
ENSG00000258017-AC011603.2	1569.42	-1.09656	0.123618	-8.87051	7.28102e-19	3.12143e-16
ENSG00000145649-GZMA	325.291	1.38742	0.157962	8.7832	1.58885e-18	6.53905e-16
ENSG00000131747-TOP2A	1258.57	-0.926752	0.105848	-8.75548	2.03232e-18	8.04252e-16
ENSG00000164032-H2AFZ	808.342	-1.23416	0.144274	-8.55428	1.18609e-17	4.51988e-15
ENSG00000165810-BTNL9	66.9968	2.64103	0.311325	8.48321	2.19065e-17	8.04985e-15
ENSG00000132640-BTBD3	57.9442	2.56521	0.307326	8.3469	7.00789e-17	2.48635e-14
ENSG00000161835-GRASP	37.3309	4.13567	0.495755	8.34216	7.29478e-17	2.50187e-14
ENSG00000171105-INSR	302.883	1.22313	0.148355	8.2446	1.65712e-16	5.50005e-14
ENSG00000101333-PLCB4	83.6598	2.13323	0.264127	8.07652	6.66428e-16	2.14278e-13
ENSG00000019582-CD74	378.931	1.17172	0.146753	7.9843	1.41319e-15	4.40616e-13
ENSG00000251562-MALAT1	8511.74	1.09358	0.138935	7.87114	3.51425e-15	1.06347e-12
ENSG00000152518-ZFP36L2	76.2333	2.22168	0.284812	7.80052	6.16518e-15	1.81239e-12
ENSG00000157514-TSC22D3	40.4754	6.02079	0.78408	7.6788	1.6059e-14	4.58975e-12
ENSG00000168268-NT5DC2	126.033	1.54024	0.201706	7.63607	2.23957e-14	6.22781e-12
ENSG00000228495-LINC01013	31.1569	3.6473	0.490656	7.43352	1.05746e-13	2.86321e-11
ENSG00000134352-IL6ST	44.4508	2.56343	0.345454	7.42047	1.16706e-13	3.07895e-11
ENSG00000076641-PAG1	41.0575	2.70788	0.366056	7.39745	1.38829e-13	3.48942e-11
ENSG00000123066-MED13L	140.743	1.47863	0.199946	7.39516	1.41239e-13	3.48942e-11
ENSG00000148180-GSN	32.2058	5.30966	0.7181	7.39403	1.42439e-13	3.48942e-11
ENSG00000244879-GABPB1-AS1	363.156	1.24987	0.169486	7.37445	1.6502e-13	3.94858e-11
ENSG00000159388-BTG2	28.7036	4.64785	0.632833	7.34451	2.06516e-13	4.8292e-11
ENSG00000157557-ETS2	218.995	1.17306	0.160857	7.29257	3.04109e-13	6.95328e-11
ENSG00000170776-AKAP13	118.276	1.53144	0.210934	7.26026	3.86335e-13	8.6413e-11
ENSG00000198830-HMGN2	1099.22	-0.846426	0.118163	-7.16324	7.8795e-13	1.72494e-10
ENSG00000154127-UBASH3B	491.935	0.948774	0.132517	7.15962	8.08987e-13	1.7341e-10
ENSG00000173068-BNC2	119.411	1.44135	0.202097	7.13198	9.89335e-13	2.0774e-10
ENSG00000196230-TUBB	1452.06	-0.89497	0.127382	-7.02589	2.12702e-12	4.37698e-10
ENSG00000066923-STAG3	27.4776	3.65825	0.52377	6.98446	2.85948e-12	5.76887e-10
ENSG00000122585-NPY	84.2641	1.73755	0.249	6.97811	2.99186e-12	5.91985e-10
ENSG00000198947-DMD	179.571	1.23041	0.176554	6.96899	3.1922e-12	6.19709e-10
ENSG00000010327-STAB1	63.3716	1.95538	0.280907	6.96096	3.37969e-12	6.43957e-10
ENSG00000160801-PTH1R	25.4603	4.08536	0.591515	6.90661	4.96385e-12	9.28601e-10
ENSG00000080503-SMARCA2	179.132	1.16878	0.174297	6.70565	2.00513e-11	3.68406e-09
ENSG00000265972-TXNIP	28.9728	3.01143	0.455599	6.60982	3.84782e-11	6.94565e-09
ENSG00000167552-TUBA1A	324.572	-1.00084	0.151622	-6.60089	4.08706e-11	7.2503e-09
ENSG00000105928-GSDME	96.2008	1.51634	0.230308	6.58397	4.58058e-11	7.98807e-09
ENSG00000124831-LRRFIP1	354.027	0.935336	0.142357	6.57033	5.02025e-11	8.60889e-09
ENSG00000176438-SYNE3	194.782	1.11288	0.170748	6.51765	7.14187e-11	1.20463e-08
ENSG00000168916-ZNF608	164.895	1.24026	0.193971	6.39404	1.61557e-10	2.68106e-08
ENSG00000158195-WASF2	219.521	1.1346	0.177523	6.39132	1.64463e-10	2.68596e-08
ENSG00000172183-ISG20	21.4981	4.21986	0.663934	6.35585	2.0728e-10	3.33234e-08
ENSG00000088325-TPX2	131.154	-1.2268	0.194205	-6.31702	2.66651e-10	4.22087e-08
ENSG00000173207-CKS1B	177.762	-1.21476	0.192813	-6.30017	2.97317e-10	4.63499e-08
ENSG00000226779-NAALADL2-AS2	105.546	1.48514	0.236447	6.28105	3.36303e-10	5.16451e-08
ENSG00000285909-AP002762.1	212.29	1.18735	0.190678	6.22699	4.75468e-10	7.19425e-08
ENSG00000168209-DDIT4	37.8166	2.41565	0.388626	6.21587	5.10419e-10	7.61117e-08
ENSG00000187193-MT1X	430.299	1.00569	0.163023	6.16898	6.87299e-10	1.01023e-07
ENSG00000117724-CENPF	807.046	-0.736387	0.119419	-6.1664	6.98617e-10	1.0124e-07
ENSG00000129422-MTUS1	33.6322	2.47751	0.403246	6.14392	8.05089e-10	1.1505e-07
ENSG00000261303-AC022748.2	24.1504	3.38792	0.551741	6.14041	8.23069e-10	1.16008e-07
ENSG00000269926-DDIT4-AS1	35.4747	2.45536	0.400396	6.13234	8.65952e-10	1.20402e-07
ENSG00000127914-AKAP9	968.645	0.763247	0.124928	6.10951	9.99399e-10	1.37104e-07
ENSG00000100354-TNRC6B	157.802	1.13195	0.185938	6.08781	1.14467e-09	1.54967e-07
ENSG00000104419-NDRG1	24.6846	3.04447	0.502033	6.06428	1.32544e-09	1.7711e-07
ENSG00000196126-HLA-DRB1	117.656	1.26288	0.209505	6.02795	1.66049e-09	2.16921e-07
ENSG00000223865-HLA-DPB1	94.517	1.45073	0.240686	6.02746	1.66554e-09	2.16921e-07
ENSG00000106948-AKNA	53.6325	1.78574	0.297097	6.01064	1.84792e-09	2.37665e-07
ENSG00000077044-DGKD	254.436	1.05158	0.175631	5.98744	2.13169e-09	2.70777e-07
ENSG00000164611-PTTG1	123.717	-1.27929	0.213761	-5.98468	2.16816e-09	2.72051e-07
ENSG00000225978-HAR1A	48.1633	1.82614	0.308285	5.92355	3.15064e-09	3.90566e-07
ENSG00000080824-HSP90AA1	1955.57	-0.640707	0.108511	-5.90454	3.53627e-09	4.33151e-07
ENSG00000143977-SNRPG	554.376	-0.810068	0.137531	-5.89006	3.8605e-09	4.67302e-07
ENSG00000126705-AHDC1	56.129	1.76154	0.300459	5.86282	4.55066e-09	5.44439e-07
ENSG00000108551-RASD1	20.3994	5.41257	0.925065	5.85101	4.88587e-09	5.77824e-07
ENSG00000185950-IRS2	83.4052	1.41674	0.24229	5.84727	4.99698e-09	5.84249e-07
ENSG00000185088-RPS27L	224.972	-1.04114	0.178242	-5.84116	5.18399e-09	5.99304e-07
ENSG00000176533-GNG7	54.0848	1.67389	0.287244	5.82742	5.62919e-09	6.43541e-07
ENSG00000183770-FOXL2	36.5228	2.1595	0.370952	5.82152	5.83158e-09	6.59353e-07
ENSG00000168528-SERINC2	20.3915	3.36683	0.5824	5.78097	7.42714e-09	8.30628e-07
ENSG00000108106-UBE2S	187.744	-0.986079	0.171143	-5.76172	8.32622e-09	9.14224e-07
ENSG00000167613-LAIR1	39.8695	2.06961	0.359234	5.76119	8.35233e-09	9.14224e-07
ENSG00000105339-DENND3	67.0624	1.55004	0.269246	5.75698	8.56299e-09	9.23822e-07
ENSG00000134243-SORT1	31.2215	2.31417	0.402053	5.75587	8.61959e-09	9.23822e-07
ENSG00000008256-CYTH3	32.3416	2.28605	0.397736	5.74766	9.04848e-09	9.59792e-07
ENSG00000100100-PIK3IP1	18.617	5.27882	0.927579	5.69096	1.26326e-08	1.32629e-06
ENSG00000178999-AURKB	151.539	-1.05566	0.186496	-5.6605	1.5093e-08	1.5686e-06
ENSG00000223551-TMSB4XP4	319.049	0.989589	0.176493	5.60695	2.05927e-08	2.11879e-06
ENSG00000044574-HSPA5	354.365	-0.797736	0.142651	-5.59224	2.24162e-08	2.28356e-06
ENSG00000164687-FABP5	197.168	-0.944509	0.169266	-5.58004	2.40466e-08	2.42565e-06
ENSG00000119705-SLIRP	415.644	-0.81902	0.146903	-5.57526	2.47165e-08	2.46901e-06
ENSG00000084070-SMAP2	37.829	1.95832	0.352803	5.55075	2.84451e-08	2.81416e-06
ENSG00000108219-TSPAN14	97.6827	1.23783	0.223611	5.53564	3.10089e-08	3.03858e-06
ENSG00000179583-CIITA	104.636	1.19583	0.216419	5.52551	3.28528e-08	3.18889e-06
ENSG00000168671-UGT3A2	49.8149	-1.70448	0.310691	-5.48609	4.10935e-08	3.95151e-06
ENSG00000100906-NFKBIA	115.873	1.1872	0.217395	5.46103	4.73387e-08	4.50653e-06
ENSG00000168675-LDLRAD4	69.2648	1.43172	0.262242	5.45952	4.77415e-08	4.50653e-06
ENSG00000047644-WWC3	69.4138	1.45409	0.267404	5.4378	5.39416e-08	5.0455e-06
ENSG00000258232-AC125611.3	227.87	-0.886888	0.16451	-5.39107	7.00395e-08	6.49222e-06
ENSG00000166123-GPT2	46.1838	-1.67736	0.311254	-5.38904	7.08344e-08	6.50728e-06
ENSG00000099901-RANBP1	284.409	-0.781092	0.145142	-5.38158	7.38336e-08	6.70839e-06
ENSG00000167553-TUBA1C	230.261	-0.876707	0.162945	-5.38038	7.43275e-08	6.70839e-06
ENSG00000092621-PHGDH	152.299	-1.03352	0.19263	-5.36529	8.08177e-08	7.23072e-06
ENSG00000170515-PA2G4	707.756	-0.634929	0.119141	-5.32922	9.86352e-08	8.74878e-06
ENSG00000123636-BAZ2B	165.627	1.07016	0.201116	5.3211	1.03141e-07	9.07022e-06
ENSG00000146192-FGD2	17.9411	3.24428	0.611287	5.3073	1.11264e-07	9.65868e-06
ENSG00000246985-SOCS2-AS1	16.6705	3.62813	0.683706	5.30657	1.1171e-07	9.65868e-06
ENSG00000117632-STMN1	660.312	-0.743167	0.140093	-5.30482	1.12783e-07	9.67022e-06
ENSG00000256235-SMIM3	10.2939	6.85792	1.29388	5.30028	1.15626e-07	9.83206e-06
ENSG00000239672-NME1	192.975	-0.942023	0.177974	-5.29305	1.20294e-07	1.01451e-05
ENSG00000184226-PCDH9	243.589	0.875786	0.165644	5.28715	1.24239e-07	1.03926e-05
ENSG00000132780-NASP	413.644	-0.785867	0.148751	-5.28312	1.27003e-07	1.05382e-05
ENSG00000109501-WFS1	17.0987	3.19234	0.605053	5.27612	1.31945e-07	1.08606e-05
ENSG00000043355-ZIC2	29.7451	2.2364	0.426355	5.24539	1.55956e-07	1.27352e-05
ENSG00000068831-RASGRP2	75.4314	1.28171	0.244557	5.24095	1.59748e-07	1.2841e-05
ENSG00000178199-ZC3H12D	17.1025	3.16394	0.603679	5.24109	1.59629e-07	1.2841e-05
ENSG00000065534-MYLK	124.117	1.13229	0.21748	5.2064	1.92542e-07	1.53571e-05
ENSG00000188229-TUBB4B	196.005	-0.874024	0.168199	-5.19635	2.03235e-07	1.60853e-05
ENSG00000074800-ENO1	797.486	-0.68463	0.13237	-5.17208	2.315e-07	1.80448e-05
ENSG00000231389-HLA-DPA1	159.381	0.98428	0.190268	5.17311	2.30225e-07	1.80448e-05
ENSG00000164684-ZNF704	107.373	1.07515	0.208017	5.1686	2.35855e-07	1.82459e-05
ENSG00000198744-MTCO3P12	1051.58	0.707124	0.136975	5.16242	2.4378e-07	1.87183e-05
ENSG00000131002-TXLNGY	151.549	1.01274	0.196631	5.15048	2.59825e-07	1.96569e-05
ENSG00000184900-SUMO3	137.48	-1.07082	0.207874	-5.15129	2.58704e-07	1.96569e-05
ENSG00000170561-IRX2	456.779	0.687458	0.133624	5.14471	2.67941e-07	2.01229e-05
ENSG00000143119-CD53	95.4931	1.41097	0.274464	5.14081	2.73559e-07	2.0396e-05
ENSG00000118308-LRMP	1624.16	0.562196	0.109612	5.12898	2.91323e-07	2.15642e-05
ENSG00000015413-DPEP1	15.568	5.61907	1.09607	5.12655	2.95105e-07	2.16881e-05
ENSG00000122707-RECK	25.8851	2.1904	0.427807	5.12006	3.05444e-07	2.22887e-05
ENSG00000136237-RAPGEF5	81.1103	1.23064	0.241755	5.09043	3.57247e-07	2.58853e-05
ENSG00000166803-PCLAF	250.22	-0.891784	0.175496	-5.08149	3.74483e-07	2.69444e-05
ENSG00000126016-AMOT	168.963	0.891795	0.176001	5.06698	4.04184e-07	2.88795e-05
ENSG00000121210-TMEM131L	189.485	0.838016	0.166056	5.0466	4.49738e-07	3.19128e-05
ENSG00000180573-HIST1H2AC	14.5425	3.42876	0.680872	5.03583	4.75775e-07	3.35291e-05
ENSG00000132361-CLUH	144.839	-0.955812	0.191529	-4.99043	6.0246e-07	4.21681e-05
ENSG00000060982-BCAT1	253.464	-0.819982	0.164405	-4.98757	6.11421e-07	4.25061e-05
ENSG00000187514-PTMA	3301.73	-0.495526	0.0995587	-4.97723	6.45019e-07	4.4541e-05
ENSG00000120690-ELF1	162.461	0.884587	0.178139	4.96572	6.8445e-07	4.68488e-05
ENSG00000196735-HLA-DQA1	13.3852	3.69749	0.744733	4.96485	6.87547e-07	4.68488e-05
ENSG00000069275-NUCKS1	1898.5	-0.500308	0.101995	-4.90522	9.33249e-07	6.31724e-05
ENSG00000164056-SPRY1	12.5582	3.91336	0.79877	4.89923	9.6211e-07	6.47003e-05
ENSG00000068489-PRR11	100.501	-1.05288	0.215952	-4.87554	1.08509e-06	7.20287e-05
ENSG00000169136-ATF5	123.756	-0.956223	0.196076	-4.87679	1.07826e-06	7.20287e-05
ENSG00000257411-AC034102.2	230.913	-0.766615	0.158561	-4.83483	1.33258e-06	8.78906e-05
ENSG00000214182-PTMAP5	1164.62	-0.559294	0.115871	-4.82687	1.38693e-06	9.06248e-05
ENSG00000284543-LINC01226	12.4886	4.23262	0.87701	4.8262	1.39165e-06	9.06248e-05
ENSG00000168036-CTNNB1	120.168	1.0123	0.210114	4.81786	1.4511e-06	9.39015e-05
ENSG00000100911-PSME2	115.856	-0.952104	0.198873	-4.7875	1.6887e-06	0.000108122
ENSG00000170312-CDK1	104.283	-1.05083	0.219511	-4.78713	1.69186e-06	0.000108122
ENSG00000151012-SLC7A11	21.0401	2.51316	0.525283	4.7844	1.715e-06	0.000108924
ENSG00000115053-NCL	1086.63	-0.51809	0.108786	-4.76249	1.9122e-06	0.000120085
ENSG00000278217-RF01871	410.368	0.88852	0.186574	4.76229	1.91408e-06	0.000120085
ENSG00000116161-CACYBP	222.155	-0.826724	0.173995	-4.75142	2.01988e-06	0.000125196
ENSG00000241666-AL031733.2	256.362	0.837318	0.176216	4.75166	2.01752e-06	0.000125196
ENSG00000138593-SECISBP2L	57.3734	1.33113	0.280446	4.74648	2.06987e-06	0.000127526
ENSG00000132341-RAN	819.256	-0.66839	0.14107	-4.73802	2.15818e-06	0.000132176
ENSG00000083454-P2RX5	54.2118	1.35832	0.287072	4.73165	2.22699e-06	0.000135583
ENSG00000120694-HSPH1	151.081	-0.85207	0.180288	-4.72617	2.28796e-06	0.000138475
ENSG00000196535-MYO18A	109.546	1.12053	0.237918	4.70974	2.48036e-06	0.000149242
ENSG00000105227-PRX	11.3972	6.02235	1.28001	4.70491	2.53983e-06	0.000151932
ENSG00000237499-AL357060.1	38.8914	1.66019	0.35352	4.69618	2.65069e-06	0.000157647
ENSG00000134333-LDHA	482.77	-0.643004	0.137506	-4.67618	2.92268e-06	0.000172824
ENSG00000125977-EIF2S2	350.845	-0.640381	0.137102	-4.67084	2.99974e-06	0.000176368
ENSG00000242574-HLA-DMB	11.6089	3.84018	0.825232	4.65346	3.26415e-06	0.000190823
ENSG00000151702-FLI1	94.6588	1.01031	0.217205	4.65141	3.29667e-06	0.000191635
ENSG00000072274-TFRC	82.2286	-1.08231	0.235882	-4.58834	4.46776e-06	0.000258251
ENSG00000137101-CD72	26.0678	1.92102	0.419938	4.57453	4.77295e-06	0.000274351
ENSG00000119138-KLF9	13.4467	2.9403	0.64434	4.56327	5.03627e-06	0.000287879
ENSG00000127530-OR7C1	11.5828	5.12133	1.12362	4.5579	5.1668e-06	0.000293708
ENSG00000250479-CHCHD10	222.398	-0.710271	0.156633	-4.53462	5.77066e-06	0.000326233
ENSG00000152818-UTRN	159.988	0.912066	0.202101	4.51291	6.3944e-06	0.000359519
ENSG00000266206-MIR3926-1	11.7873	3.3018	0.732107	4.51	6.48289e-06	0.000362513
ENSG00000110108-TMEM109	77.6871	-1.09743	0.24369	-4.50339	6.68788e-06	0.000371954
ENSG00000197093-GAL3ST4	21.8279	2.22341	0.495199	4.48993	7.12478e-06	0.000394123
ENSG00000115306-SPTBN1	164.332	0.827491	0.184426	4.48685	7.22846e-06	0.00039772
ENSG00000137135-ARHGEF39	34.1272	1.62052	0.361769	4.47943	7.48443e-06	0.000409613
ENSG00000106105-GARS	108.771	-0.933962	0.208883	-4.47123	7.7771e-06	0.000417254
ENSG00000164405-UQCRQ	497.971	-0.652881	0.145982	-4.47234	7.73699e-06	0.000417254
ENSG00000198771-RCSD1	288.737	0.739622	0.165314	4.47403	7.67579e-06	0.000417254
ENSG00000283523-MIR3926-2	11.6489	3.28232	0.73414	4.47098	7.78625e-06	0.000417254
ENSG00000131174-COX7B	498.916	-0.620502	0.138822	-4.46978	7.83e-06	0.000417424
ENSG00000085662-AKR1B1	253.735	0.690363	0.154724	4.4619	8.12349e-06	0.000428628
ENSG00000089685-BIRC5	114.741	-0.931837	0.208812	-4.46257	8.09816e-06	0.000428628
ENSG00000157654-PALM2-AKAP2	45.2884	1.50445	0.33747	4.45802	8.27204e-06	0.000432036
ENSG00000241978-AKAP2	45.2884	1.50445	0.33747	4.45802	8.27204e-06	0.000432036
ENSG00000159958-TNFRSF13C	100.519	0.980115	0.220026	4.45454	8.40721e-06	0.000436878
ENSG00000229344-MTCO2P12	1991.89	0.54982	0.123515	4.45142	8.53024e-06	0.000441043
ENSG00000136051-WASHC4	63.3916	1.20302	0.270558	4.44644	8.73046e-06	0.000449138
ENSG00000250305-TRMT9B	25.7231	1.86044	0.418647	4.44393	8.83296e-06	0.000452151
ENSG00000138756-BMP2K	64.002	1.15155	0.260032	4.42852	9.48835e-06	0.000483295
ENSG00000079215-SLC1A3	15.1611	2.56669	0.580107	4.42452	9.66564e-06	0.0004899
ENSG00000030419-IKZF2	64.227	-1.182	0.267276	-4.42237	9.76227e-06	0.000490386
ENSG00000072571-HMMR	78.5356	-1.0643	0.240674	-4.42219	9.77053e-06	0.000490386
ENSG00000108424-KPNB1	599.694	-0.522464	0.119009	-4.39011	1.13295e-05	0.000565872
ENSG00000120438-TCP1	242.619	-0.696348	0.158775	-4.38575	1.15588e-05	0.000574534
ENSG00000091409-ITGA6	28.2922	1.74624	0.398369	4.38347	1.16805e-05	0.000575027
ENSG00000124839-RAB17	11.6861	3.38734	0.772701	4.38377	1.16644e-05	0.000575027
ENSG00000204642-HLA-F	25.3659	2.05582	0.469579	4.378	1.19774e-05	0.000586835
ENSG00000197744-PTMAP2	590.837	-0.595571	0.136249	-4.37118	1.23576e-05	0.000602592
ENSG00000091651-ORC6	84.4494	-1.0126	0.232686	-4.35177	1.35042e-05	0.000652739
ENSG00000099194-SCD	77.6503	-1.10636	0.254241	-4.35163	1.35128e-05	0.000652739
ENSG00000166851-PLK1	68.0216	-1.10381	0.254452	-4.33798	1.438e-05	0.000691381
ENSG00000120437-ACAT2	177.637	-0.757418	0.175043	-4.32704	1.51124e-05	0.00071987
ENSG00000236824-BCYRN1	37.3403	-1.48305	0.342722	-4.32726	1.50976e-05	0.00071987
ENSG00000179362-HMGN2P46	129.178	-0.842309	0.194768	-4.32468	1.52751e-05	0.000724264
ENSG00000127589-TUBBP1	96.3706	-1.04752	0.242561	-4.31856	1.57047e-05	0.000741219
ENSG00000119969-HELLS	234.944	-0.692719	0.161131	-4.2991	1.71493e-05	0.000805704
ENSG00000104738-MCM4	112.579	-0.899603	0.20939	-4.29631	1.73661e-05	0.000812182
ENSG00000115541-HSPE1	339.564	-0.667218	0.15581	-4.28224	1.8502e-05	0.000861387
ENSG00000158164-TMSB15A	56.0734	-1.22495	0.286244	-4.2794	1.87394e-05	0.000868514
ENSG00000088247-KHSRP	582.306	-0.638683	0.14935	-4.27642	1.89923e-05	0.000876288
ENSG00000104213-PDGFRL	10.5022	3.37892	0.790786	4.27287	1.92977e-05	0.0008864
ENSG00000137962-ARHGAP29	32.3394	1.71003	0.401144	4.26288	2.01812e-05	0.000922865
ENSG00000163453-IGFBP7	154.967	0.901103	0.211673	4.25704	2.07149e-05	0.000943077
ENSG00000149136-SSRP1	312.075	-0.595725	0.140235	-4.24806	2.15632e-05	0.000977372
ENSG00000135069-PSAT1	85.003	-1.13371	0.266945	-4.24698	2.16675e-05	0.000977792
ENSG00000159884-CCDC107	32.5355	1.56342	0.368393	4.2439	2.19666e-05	0.00098696
ENSG00000101057-MYBL2	101.4	-0.895009	0.211553	-4.23066	2.33002e-05	0.00104233
ENSG00000137642-SORL1	44.0136	1.37414	0.324949	4.22879	2.34953e-05	0.0010465
ENSG00000166750-SLFN5	37.6609	1.50083	0.356243	4.21295	2.52054e-05	0.00111784
ENSG00000164045-CDC25A	49.6599	-1.28398	0.3052	-4.207	2.58788e-05	0.00114278
ENSG00000197971-MBP	94.4914	0.983892	0.234905	4.18846	2.80852e-05	0.00123491
ENSG00000121966-CXCR4	60.7794	1.11823	0.2674	4.18184	2.89154e-05	0.001266
ENSG00000179796-LRRC3B	14.2468	2.73026	0.653502	4.17789	2.94222e-05	0.00128273
ENSG00000128833-MYO5C	17.7188	2.17304	0.520485	4.17502	2.97955e-05	0.00129353
ENSG00000188163-FAM166A	132.414	-0.786449	0.18922	-4.15626	3.23494e-05	0.0013985
ENSG00000158106-RHPN1	43.8123	1.3721	0.330242	4.15484	3.25517e-05	0.00140136
ENSG00000147162-OGT	90.7064	0.948969	0.228548	4.15216	3.29355e-05	0.00141197
ENSG00000138162-TACC2	14.6519	2.41601	0.582525	4.14748	3.36149e-05	0.00142919
ENSG00000172995-ARPP21	31.3569	1.67674	0.404269	4.14758	3.36012e-05	0.00142919
ENSG00000189043-NDUFA4	484.603	-0.569098	0.137681	-4.13345	3.57355e-05	0.0015131
ENSG00000131153-GINS2	57.805	-1.13613	0.275034	-4.1309	3.61353e-05	0.00152375
ENSG00000174500-GCSAM	43.3652	1.30692	0.316678	4.12695	3.67602e-05	0.00154378
ENSG00000101361-NOP56	502.542	-0.513576	0.124493	-4.12533	3.7021e-05	0.00154841
ENSG00000184990-SIVA1	184.649	-0.775984	0.188178	-4.12366	3.729e-05	0.00155335
ENSG00000096384-HSP90AB1	1687.66	-0.443894	0.107885	-4.11452	3.87991e-05	0.00160969
ENSG00000134744-TUT4	93.1433	0.953786	0.232633	4.09996	4.13224e-05	0.00170749
ENSG00000107984-DKK1	10.7735	3.17451	0.775165	4.09528	4.21667e-05	0.00171889
ENSG00000163291-PAQR3	56.7688	1.13168	0.27619	4.09745	4.1773e-05	0.00171889
ENSG00000168439-STIP1	113.014	-0.864492	0.211078	-4.09561	4.21059e-05	0.00171889
ENSG00000267458-AC092069.1	256.696	-0.627195	0.153171	-4.09473	4.22665e-05	0.00171889
ENSG00000102144-PGK1	103.838	-0.92483	0.226036	-4.09151	4.28573e-05	0.00173606
ENSG00000167088-SNRPD1	353.834	-0.736489	0.180096	-4.08943	4.32429e-05	0.00174481
ENSG00000126814-TRMT5	175.127	-0.733661	0.179925	-4.07759	4.5504e-05	0.00182887
ENSG00000159199-ATP5MC1	278.67	-0.656516	0.161243	-4.07159	4.66931e-05	0.00186936
ENSG00000162607-USP1	126.463	-0.784866	0.192886	-4.06907	4.72017e-05	0.00187513
ENSG00000172115-CYCS	188.521	-0.709735	0.174421	-4.0691	4.71961e-05	0.00187513
ENSG00000157554-ERG	44.8714	1.27448	0.313389	4.06677	4.76699e-05	0.00188645
ENSG00000148773-MKI67	151.844	-0.743366	0.182896	-4.06441	4.8154e-05	0.0018983
ENSG00000137804-NUSAP1	235.302	-0.626492	0.154489	-4.05527	5.00771e-05	0.00196658
ENSG00000153094-BCL2L11	46.9816	1.23171	0.304469	4.04544	5.22244e-05	0.00204311
ENSG00000142230-SAE1	134.962	-0.80338	0.198705	-4.04309	5.27516e-05	0.00205592
ENSG00000204003-AL355987.1	23.7972	1.79007	0.443384	4.03729	5.40716e-05	0.00209941
ENSG00000117616-RSRP1	125.715	0.875132	0.217179	4.02954	5.5885e-05	0.00216166
ENSG00000077782-FGFR1	101.468	0.891346	0.221439	4.02525	5.69142e-05	0.00219322
ENSG00000204257-HLA-DMA	14.0889	2.33194	0.580628	4.01623	5.91372e-05	0.00227038
ENSG00000058673-ZC3H11A	152.084	0.779205	0.19433	4.00969	6.07982e-05	0.00230831
ENSG00000160957-RECQL4	62.4024	-1.07765	0.268705	-4.01052	6.05855e-05	0.00230831
ENSG00000257315-ZBED6	151.414	0.783286	0.195272	4.01126	6.03956e-05	0.00230831
ENSG00000134690-CDCA8	80.3075	-0.946011	0.237304	-3.98649	6.70588e-05	0.00253665
ENSG00000123338-NCKAP1L	106.168	0.823962	0.207735	3.96642	7.29608e-05	0.00273976
ENSG00000148700-ADD3	118.466	0.80732	0.203504	3.9671	7.27539e-05	0.00273976
ENSG00000018510-AGPS	16.1536	2.14032	0.540184	3.96221	7.4258e-05	0.00277833
ENSG00000196419-XRCC6	154.045	-0.705418	0.178356	-3.95511	7.64997e-05	0.00285183
ENSG00000172336-POP7	75.9873	-1.01685	0.258447	-3.93448	8.33775e-05	0.00309701
ENSG00000111371-SLC38A1	128.865	0.797106	0.202706	3.93232	8.41286e-05	0.00310306
ENSG00000124126-PREX1	9.2096	3.22535	0.820224	3.93228	8.41435e-05	0.00310306
ENSG00000102900-NUP93	91.2987	-0.891759	0.227308	-3.92313	8.7407e-05	0.0032119
ENSG00000010322-NISCH	46.645	1.24745	0.318048	3.92222	8.77379e-05	0.00321258
ENSG00000106211-HSPB1	282.719	-0.648813	0.16558	-3.91842	8.91321e-05	0.00324057
ENSG00000107833-NPM3	99.0778	-0.854468	0.218034	-3.91897	8.89266e-05	0.00324057
ENSG00000230590-FTX	183.539	0.713326	0.182225	3.91454	9.05771e-05	0.00328151
ENSG00000130653-PNPLA7	14.7429	2.23862	0.57209	3.91305	9.11379e-05	0.00328699
ENSG00000172738-TMEM217	8.22035	4.61316	1.1791	3.91244	9.13673e-05	0.00328699
ENSG00000182481-KPNA2	92.2319	-0.888799	0.227639	-3.90442	9.44514e-05	0.0033861
ENSG00000228716-DHFR	200.105	-0.638603	0.163617	-3.90303	9.49957e-05	0.00339379
ENSG00000047346-FAM214A	13.9051	2.3248	0.595841	3.90172	9.55135e-05	0.00340048
ENSG00000105281-SLC1A5	42.8803	-1.25649	0.322894	-3.89134	9.96928e-05	0.00348891
ENSG00000136824-SMC2	180.263	-0.661959	0.1701	-3.89159	9.9588e-05	0.00348891
ENSG00000146094-DOK3	57.9496	1.05556	0.271033	3.89457	9.83737e-05	0.00348891
ENSG00000167483-FAM129C	94.9665	0.911652	0.234214	3.8924	9.92587e-05	0.00348891
ENSG00000251357-AP000350.4	517.902	-0.515925	0.1325	-3.89376	9.87003e-05	0.00348891
ENSG00000143344-RGL1	15.9979	2.04688	0.526835	3.88524	0.000102229	0.00356553
ENSG00000004779-NDUFAB1	177.492	-0.721401	0.186047	-3.87752	0.000105525	0.00364958
ENSG00000099800-TIMM13	161.133	-0.677264	0.174679	-3.87719	0.000105671	0.00364958
ENSG00000169976-SF3B5	168.814	-0.701683	0.180981	-3.87711	0.000105703	0.00364958
ENSG00000189319-FAM53B	39.3215	1.29023	0.332904	3.87569	0.000106321	0.00365865
ENSG00000172493-AFF1	42.5628	1.38591	0.358287	3.86814	0.000109667	0.0037612
ENSG00000100632-ERH	271.332	-0.62675	0.162216	-3.86368	0.000111691	0.00381792
ENSG00000259746-HSPE1P3	57.3555	-1.11108	0.288043	-3.85735	0.000114622	0.00390512
ENSG00000179218-CALR	308.349	-0.569264	0.147619	-3.85632	0.000115109	0.00390877
ENSG00000173598-NUDT4	69.8423	0.957928	0.248713	3.85155	0.000117375	0.00397259
ENSG00000188042-ARL4C	293.315	-0.578257	0.150212	-3.8496	0.000118311	0.00399116
ENSG00000166986-MARS	100.869	-0.824847	0.214698	-3.84189	0.000122091	0.0041052
ENSG00000134308-YWHAQ	283.91	-0.610952	0.159098	-3.8401	0.000122983	0.00412175
ENSG00000175198-PCCA	24.5405	1.62048	0.422193	3.83824	0.00012392	0.00413964
ENSG00000166508-MCM7	188.525	-0.737085	0.192153	-3.83592	0.000125094	0.00416534
ENSG00000110721-CHKA	59.9223	1.17414	0.306162	3.83503	0.000125548	0.00416698
ENSG00000144381-HSPD1	519.386	-0.482159	0.126297	-3.81768	0.000134714	0.00445682
ENSG00000123374-CDK2	115.312	-0.765296	0.200591	-3.8152	0.000136073	0.00447303
ENSG00000173821-RNF213	63.0604	1.02541	0.268767	3.81525	0.000136047	0.00447303
ENSG00000134398-ERN2	10.8839	-2.68424	0.703779	-3.81405	0.000136709	0.00447963
ENSG00000141298-SSH2	45.7858	1.20235	0.315849	3.80673	0.000140817	0.0045419
ENSG00000147955-SIGMAR1	47.0774	-1.16526	0.306078	-3.80706	0.000140629	0.0045419
ENSG00000170476-MZB1	111.266	0.79525	0.208875	3.8073	0.000140491	0.0045419
ENSG00000171314-PGAM1	140.132	-0.753687	0.19788	-3.80882	0.000139634	0.0045419
ENSG00000234854-LINC00676	17.1844	2.0065	0.526702	3.80956	0.000139216	0.0045419
ENSG00000152601-MBNL1	182.287	-0.651624	0.17122	-3.80578	0.00014136	0.00454515
ENSG00000267541-MTCO2P2	511.873	0.50357	0.132488	3.80087	0.000144188	0.00462166
ENSG00000267852-AC119396.2	17.7263	1.9675	0.518227	3.79659	0.000146702	0.00468762
ENSG00000100201-DDX17	538.489	0.461389	0.121633	3.79328	0.000148672	0.00473587
ENSG00000028277-POU2F2	25.9659	1.56311	0.413	3.78477	0.000153848	0.00488562
ENSG00000035928-RFC1	139.537	-0.719413	0.190142	-3.78355	0.000154605	0.00489454
ENSG00000169762-TAPT1	27.5939	1.47922	0.391058	3.78261	0.000155195	0.00489818
ENSG00000264069-MIR3943	8.67722	3.31563	0.880019	3.76768	0.000164771	0.00518448
ENSG00000159200-RCAN1	12.834	2.27691	0.604451	3.76692	0.000165276	0.00518454
ENSG00000117318-ID3	104.614	-0.802009	0.213075	-3.76398	0.00016723	0.00522988
ENSG00000182162-P2RY8	31.905	1.4396	0.382637	3.76232	0.000168345	0.00524878
ENSG00000108474-PIGL	105.01	-0.776666	0.206787	-3.75587	0.000172739	0.00536953
ENSG00000130755-GMFG	310.416	0.615561	0.163976	3.75397	0.000174057	0.0053942
ENSG00000135821-GLUL	87.9179	0.830956	0.221895	3.74481	0.000180527	0.00557528
ENSG00000154518-ATP5MC3	573.73	-0.557552	0.148912	-3.74418	0.000180984	0.00557528
ENSG00000137309-HMGA1	289.724	-0.549982	0.147156	-3.7374	0.000185934	0.00571066
ENSG00000269155-AL009178.2	8.74954	3.26715	0.875487	3.73181	0.000190109	0.00582152
ENSG00000167670-CHAF1A	74.1674	-0.945899	0.253597	-3.72994	0.000191528	0.00584758
ENSG00000177954-RPS27	734.961	0.476702	0.127848	3.72865	0.000192507	0.00586006
ENSG00000125870-SNRPB2	346.862	-0.593054	0.159128	-3.72691	0.000193842	0.0058833
ENSG00000124562-SNRPC	134.603	-0.727915	0.196625	-3.70204	0.000213874	0.00642837
ENSG00000174886-NDUFA11	175.896	-0.627751	0.169592	-3.70153	0.0002143	0.00642837
ENSG00000177200-CHD9	182.947	0.699142	0.188816	3.70277	0.00021326	0.00642837
ENSG00000243175-RPSAP36	26.8788	1.48916	0.402162	3.7029	0.00021315	0.00642837
ENSG00000160131-VMA21	75.2697	-0.88447	0.239062	-3.69975	0.000215808	0.0064548
ENSG00000127533-F2RL3	21.5595	1.80441	0.488353	3.6949	0.000219972	0.00656027
ENSG00000185803-SLC52A2	30.8231	-1.42725	0.386504	-3.69272	0.000221866	0.00657863
ENSG00000244578-LINC01391	8.10896	3.21278	0.869959	3.69303	0.000221602	0.00657863
ENSG00000013810-TACC3	53.6289	-1.05242	0.285107	-3.69132	0.000223095	0.00659606
ENSG00000163808-KIF15	90.8331	-0.837828	0.22722	-3.6873	0.000226644	0.00668177
ENSG00000197302-ZNF720	30.2011	1.41452	0.383808	3.68548	0.000228268	0.00671043
ENSG00000100401-RANGAP1	76.3957	-0.900939	0.245245	-3.67363	0.000239124	0.00700955
ENSG00000100526-CDKN3	42.4187	-1.18128	0.321718	-3.67179	0.000240856	0.00702032
ENSG00000106399-RPA3	71.7087	-0.897548	0.244396	-3.67251	0.000240179	0.00702032
ENSG00000109046-WSB1	164.712	0.686836	0.187145	3.67007	0.000242481	0.00704771
ENSG00000100365-NCF4	104.738	0.783879	0.214228	3.65909	0.000253109	0.00733587
ENSG00000068305-MEF2A	93.2527	0.802788	0.219574	3.65612	0.000256057	0.00740049
ENSG00000148229-POLE3	152.563	-0.668747	0.183359	-3.64719	0.000265119	0.00763108
ENSG00000198727-MT-CYB	13865.5	0.462692	0.126876	3.64681	0.000265519	0.00763108
ENSG00000072609-CHFR	26.2691	1.52041	0.417246	3.64391	0.000268529	0.00769608
ENSG00000242086-MUC20-OT1	91.7288	0.857799	0.235476	3.64283	0.000269654	0.00770686
ENSG00000236526-AL035448.1	17.3695	1.82598	0.50138	3.64191	0.000270625	0.00771318
ENSG00000106628-POLD2	92.3646	-0.801919	0.220359	-3.63915	0.000273539	0.00777471
ENSG00000117868-ESYT2	64.9172	0.928257	0.255611	3.63153	0.00028175	0.00798602
ENSG00000271980-AC012640.4	195.889	-0.637673	0.175689	-3.62956	0.000283906	0.00802502
ENSG00000125835-SNRPB	232.769	-0.579815	0.160395	-3.61493	0.000300426	0.00846871
ENSG00000263585-AC145207.4	48.1933	-1.17262	0.324761	-3.61071	0.000305361	0.00858431
ENSG00000110958-PTGES3	224.444	-0.60099	0.16654	-3.60868	0.000307763	0.00862827
ENSG00000147684-NDUFB9	599.812	-0.505018	0.139984	-3.60769	0.000308933	0.00863752
ENSG00000156170-NDUFAF6	81.2439	0.851729	0.23651	3.60124	0.000316708	0.00883092
ENSG00000101040-ZMYND8	218.788	0.673589	0.1876	3.59056	0.000329969	0.0091758
ENSG00000122565-CBX3	758.208	-0.436117	0.121522	-3.5888	0.000332198	0.00921291
ENSG00000102606-ARHGEF7	65.268	0.909942	0.253776	3.58561	0.000336285	0.00930118
ENSG00000129292-PHF20L1	209.455	0.590535	0.164729	3.5849	0.000337213	0.00930183
ENSG00000183010-PYCR1	48.4729	-1.16287	0.324455	-3.58409	0.000338255	0.00930564
ENSG00000166582-CENPV	100.679	-0.754521	0.211563	-3.56641	0.00036191	0.00990342
ENSG00000256618-MTRNR2L1	456.214	0.598405	0.167761	3.56701	0.000361071	0.00990342
ENSG00000120899-PTK2B	107.829	0.766469	0.21603	3.54798	0.000388201	0.0105947
ENSG00000112312-GMNN	67.0412	-0.937345	0.26425	-3.54719	0.000389362	0.0105983
ENSG00000218537-MIF-AS1	545.243	-0.47076	0.132853	-3.54346	0.000394919	0.0107212
ENSG00000122884-P4HA1	45.0026	1.11842	0.315764	3.54194	0.000397189	0.0107262
ENSG00000145779-TNFAIP8	47.9873	-1.04149	0.29399	-3.54261	0.000396182	0.0107262
ENSG00000116120-FARSB	68.5103	-0.886524	0.25086	-3.53394	0.000409419	0.0110028
ENSG00000140848-CPNE2	35.257	1.24356	0.351901	3.53384	0.000409571	0.0110028
ENSG00000109458-GAB1	45.1321	1.10608	0.31322	3.53132	0.000413493	0.0110792
ENSG00000240972-MIF	546.316	-0.465715	0.132095	-3.52559	0.000422533	0.0112921
ENSG00000145494-NDUFS6	203.97	-0.61471	0.174573	-3.52122	0.000429559	0.0114501
ENSG00000171700-RGS19	26.4868	1.46618	0.416769	3.51798	0.000434845	0.011561
ENSG00000225067-RPL23AP2	31.0066	1.42685	0.405776	3.51635	0.000437525	0.0116023
ENSG00000077152-UBE2T	119.063	-0.882982	0.251534	-3.51039	0.000447452	0.0117745
ENSG00000156802-ATAD2	134.932	-0.653661	0.186142	-3.51162	0.00044539	0.0117745
ENSG00000263934-SNORD3A	34.2676	1.64974	0.46992	3.51069	0.000446945	0.0117745
ENSG00000084090-STARD7	161.314	-0.625853	0.178388	-3.50838	0.000450839	0.0118334
ENSG00000145349-CAMK2D	53.955	1.06108	0.302773	3.50454	0.000457402	0.0119751
ENSG00000128272-ATF4	260.371	-0.623197	0.177899	-3.5031	0.000459878	0.0120094
ENSG00000154473-BUB3	216.413	-0.551342	0.157719	-3.49573	0.000472772	0.0122876
ENSG00000267694-AP005131.5	18.9052	1.79921	0.5147	3.49564	0.000472923	0.0122876
ENSG00000141337-ARSG	17.4195	1.74286	0.498789	3.49418	0.000475526	0.0123241
ENSG00000131711-MAP1B	88.9655	-0.839489	0.240419	-3.49178	0.000479819	0.0124042
ENSG00000065911-MTHFD2	104.265	-0.728626	0.209084	-3.48485	0.000492411	0.0126895
ENSG00000285920-AC087721.2	225.664	-0.547372	0.157094	-3.48436	0.000493324	0.0126895
ENSG00000057704-TMCC3	19.4707	1.67426	0.481038	3.48052	0.000500445	0.0128086
ENSG00000224411-HSP90AA2P	157.38	-0.671192	0.192818	-3.48096	0.000499627	0.0128086
ENSG00000166432-ZMAT1	36.7512	1.2371	0.355621	3.47871	0.00050384	0.0128635
ENSG00000198826-ARHGAP11A	54.3957	-0.998116	0.287194	-3.47541	0.000510076	0.0129905
ENSG00000109805-NCAPG	68.0194	-0.897451	0.258308	-3.47435	0.000512099	0.0130098
ENSG00000142856-ITGB3BP	89.7989	-0.794725	0.229107	-3.46879	0.000522808	0.0132492
ENSG00000139132-FGD4	13.6974	1.9948	0.575235	3.4678	0.000524729	0.0132652
ENSG00000163009-C2orf48	16.3617	-1.83822	0.530735	-3.46354	0.000533126	0.0134444
ENSG00000187922-LCN10	17.8578	1.77753	0.513692	3.4603	0.00053958	0.0135739
ENSG00000147526-TACC1	69.5759	0.853414	0.247317	3.45068	0.000559171	0.0140106
ENSG00000268861-AC008878.3	54.4141	0.971158	0.281459	3.45045	0.000559661	0.0140106
ENSG00000102172-SMS	169.475	-0.661064	0.191871	-3.44536	0.000570301	0.014175
ENSG00000130348-QRSL1	78.8077	0.855209	0.248223	3.44533	0.000570361	0.014175
ENSG00000176890-TYMS	130.677	-0.794945	0.230711	-3.44564	0.000569715	0.014175
ENSG00000138182-KIF20B	171.283	-0.634865	0.184307	-3.44461	0.000571887	0.0141787
ENSG00000132334-PTPRE	32.8475	1.22956	0.357179	3.44241	0.000576548	0.0142598
ENSG00000197345-MRPL21	104.374	-0.738271	0.214754	-3.43775	0.00058656	0.0144727
ENSG00000087460-GNAS	461.629	0.575376	0.16745	3.4361	0.000590158	0.0145266
ENSG00000164463-CREBRF	19.4196	1.70093	0.495249	3.43449	0.000593673	0.0145783
ENSG00000170160-CCDC144A	13.4013	2.20277	0.642957	3.42599	0.000612553	0.0150061
ENSG00000069493-CLEC2D	196.672	-0.567362	0.165724	-3.42352	0.000618148	0.0151072
ENSG00000112137-PHACTR1	51.9869	1.05232	0.307494	3.42224	0.000621083	0.015143
ENSG00000143369-ECM1	9.29476	2.47182	0.722798	3.4198	0.00062668	0.0152433
ENSG00000164292-RHOBTB3	108.023	0.710857	0.208206	3.4142	0.000639696	0.0155232
ENSG00000141959-PFKL	97.8586	0.744784	0.218196	3.41337	0.000641658	0.0155342
ENSG00000181163-NPM1	1216.4	-0.376445	0.110509	-3.40645	0.000658134	0.0158956
ENSG00000112759-SLC29A1	46.8523	-1.02558	0.301264	-3.40426	0.000663437	0.0159862
ENSG00000111145-ELK3	12.1803	2.06209	0.606007	3.40275	0.000667102	0.0159878
ENSG00000150753-CCT5	256.604	-0.525052	0.154322	-3.40232	0.000668166	0.0159878
ENSG00000218227-AC136632.1	105.716	0.962154	0.282726	3.40313	0.000666189	0.0159878
ENSG00000090889-KIF4A	42.6123	-1.06407	0.31349	-3.39426	0.000688152	0.0163898
ENSG00000240230-COX19	113.252	0.75057	0.221124	3.39434	0.00068794	0.0163898
ENSG00000144554-FANCD2	73.5921	-0.83988	0.247579	-3.39237	0.000692899	0.0164648
ENSG00000113368-LMNB1	109.434	-0.703557	0.207524	-3.39025	0.000698299	0.0165548
ENSG00000154277-UCHL1	113.348	-0.691132	0.204103	-3.38619	0.000708715	0.0167631
ENSG00000151276-MAGI1	116.095	-0.682213	0.20168	-3.38266	0.000717874	0.0169197
ENSG00000183011-NAA38	154.281	-0.636013	0.188037	-3.38237	0.000718622	0.0169197
ENSG00000163468-CCT3	201.749	-0.556985	0.164856	-3.37861	0.000728545	0.0171142
ENSG00000132199-ENOSF1	129.47	-0.785557	0.232568	-3.37776	0.000730801	0.0171281
ENSG00000171951-SCG2	12.3154	2.09882	0.622695	3.37055	0.000750189	0.0175425
ENSG00000168078-PBK	33.8477	-1.19182	0.355158	-3.35573	0.000791545	0.0184676
ENSG00000108107-RPL28	716.929	0.441582	0.131789	3.35067	0.000806162	0.0187661
ENSG00000108848-LUC7L3	791.646	0.459007	0.137037	3.3495	0.000809567	0.0188028
ENSG00000101773-RBBP8	75.3782	-0.809679	0.241777	-3.34887	0.000811432	0.0188037
ENSG00000104880-ARHGEF18	53.7305	0.945596	0.282685	3.34505	0.000822673	0.0190213
ENSG00000139514-SLC7A1	43.3431	-1.04465	0.313816	-3.32885	0.000872057	0.0201179
ENSG00000111639-MRPL51	168.326	-0.581058	0.174851	-3.32317	0.000890009	0.0204861
ENSG00000228519-AC097263.1	86.3163	-0.803581	0.241956	-3.32119	0.000896338	0.0205858
ENSG00000079616-KIF22	67.8588	-0.842409	0.253856	-3.31845	0.000905185	0.0206966
ENSG00000169710-FASN	127.05	-0.638722	0.192442	-3.31905	0.000903257	0.0206966
ENSG00000113971-NPHP3	13.9147	1.85895	0.560753	3.3151	0.000916096	0.0208996
ENSG00000171960-PPIH	56.4073	-0.926935	0.280503	-3.30455	0.000951281	0.0216543
ENSG00000198886-MT-ND4	18790.8	0.397543	0.120527	3.29838	0.000972434	0.0220869
ENSG00000210077-MT-TV	151.492	0.705169	0.213928	3.2963	0.000979675	0.0222024
ENSG00000100350-FOXRED2	51.3764	-0.977622	0.297199	-3.28946	0.00100381	0.0226994
ENSG00000104325-DECR1	78.6221	0.764065	0.232847	3.28141	0.00103291	0.0233062
ENSG00000100764-PSMC1	177.42	-0.583307	0.178171	-3.27385	0.00106092	0.0238858
ENSG00000130193-THEM6	60.2749	-0.959296	0.293434	-3.26921	0.00107848	0.024228
ENSG00000099817-POLR2E	149.314	-0.61417	0.18847	-3.25872	0.00111917	0.025042
ENSG00000173692-PSMD1	158.944	-0.632497	0.1941	-3.25861	0.00111958	0.025042
ENSG00000006634-DBF4	68.8835	-0.852761	0.261842	-3.25678	0.00112683	0.0251497
ENSG00000133107-TRPC4	10.4846	2.14884	0.660132	3.25517	0.00113324	0.025238
ENSG00000232442-MHENCR	19.3525	1.55625	0.478228	3.25421	0.00113708	0.0252687
ENSG00000055208-TAB2	32.3836	1.25002	0.384324	3.25252	0.00114388	0.0253651
ENSG00000169372-CRADD	15.1046	1.80871	0.55622	3.25179	0.00114682	0.0253756
ENSG00000101182-PSMA7	468.994	-0.45617	0.140329	-3.25072	0.00115114	0.0254164
ENSG00000123131-PRDX4	47.4197	-1.06545	0.328095	-3.24737	0.00116476	0.025662
ENSG00000184220-CMSS1	85.9167	-0.752	0.231919	-3.24252	0.00118478	0.0260475
ENSG00000184261-KCNK12	64.7677	-0.833729	0.257295	-3.24036	0.00119378	0.0261893
ENSG00000065268-WDR18	68.2178	-0.864001	0.266835	-3.23796	0.00120389	0.0263549
ENSG00000049618-ARID1B	210.889	0.563348	0.174119	3.23542	0.00121465	0.0264218
ENSG00000117877-CD3EAP	50.3236	-0.926991	0.286513	-3.23542	0.00121463	0.0264218
ENSG00000146386-ABRACL	135.509	-0.605523	0.187113	-3.23614	0.0012116	0.0264218
ENSG00000117399-CDC20	89.5921	-0.72414	0.224212	-3.2297	0.00123918	0.0268987
ENSG00000139618-BRCA2	80.2556	-0.804299	0.2491	-3.22882	0.00124302	0.026925
ENSG00000171467-ZNF318	41.3901	1.08508	0.336212	3.22736	0.00124937	0.0270057
ENSG00000164109-MAD2L1	36.9522	-1.16302	0.360568	-3.22551	0.00125748	0.0271242
ENSG00000173334-TRIB1	24.5165	1.35187	0.421616	3.20639	0.0013441	0.0289319
ENSG00000273270-AC090114.2	24.9874	1.35283	0.422003	3.20574	0.00134715	0.028937
ENSG00000105202-FBL	386.555	-0.467067	0.145764	-3.20428	0.00135402	0.0290241
ENSG00000169442-CD52	40.5956	1.04941	0.327839	3.201	0.00136954	0.0292955
ENSG00000183199-HSP90AB3P	113.41	-0.646255	0.202078	-3.19805	0.00138359	0.0294359
ENSG00000213420-GPC2	61.1212	0.897665	0.280678	3.1982	0.0013829	0.0294359
ENSG00000241837-ATP5PO	389.978	-0.451124	0.141072	-3.19783	0.00138468	0.0294359
ENSG00000105369-CD79A	131.163	0.609341	0.190672	3.19575	0.00139466	0.0295261
ENSG00000258539-AC068896.1	11.4799	2.11222	0.660931	3.19583	0.00139427	0.0295261
ENSG00000189159-JPT1	134.031	-0.600053	0.188439	-3.18433	0.00145088	0.0306531
ENSG00000196396-PTPN1	170.408	0.55622	0.174956	3.1792	0.00147684	0.0311377
ENSG00000260342-AC138811.2	954.122	0.527946	0.166148	3.17757	0.00148513	0.0312485
ENSG00000270640-AC104695.3	22.4299	1.39167	0.438218	3.17576	0.00149444	0.0313803
ENSG00000177733-HNRNPA0	138.328	-0.589418	0.185969	-3.16943	0.00152736	0.0320061
ENSG00000070540-WIPI1	23.087	1.37514	0.434298	3.16635	0.00154363	0.0322813
ENSG00000172578-KLHL6	17.7519	1.66218	0.525351	3.16393	0.00155652	0.0324848
ENSG00000136861-CDK5RAP2	94.6755	-0.696798	0.220398	-3.16154	0.00156936	0.0326865
ENSG00000173406-DAB1	22.409	-1.36165	0.43104	-3.15899	0.00158317	0.0329075
ENSG00000126602-TRAP1	95.8565	-0.735966	0.233063	-3.1578	0.00158965	0.0329757
ENSG00000100650-SRSF5	245.068	0.525806	0.16662	3.15571	0.00160107	0.0331457
ENSG00000152661-GJA1	35.5368	-1.08993	0.345549	-3.1542	0.00160936	0.0332504
ENSG00000074696-HACD3	130.083	-0.594581	0.188637	-3.15198	0.00162166	0.0333978
ENSG00000079246-XRCC5	414.608	-0.441504	0.140083	-3.15174	0.00162299	0.0333978
ENSG00000066279-ASPM	309.275	-0.459204	0.14619	-3.14115	0.00168286	0.0345607
ENSG00000215021-PHB2	237.759	-0.525404	0.167514	-3.13649	0.00170986	0.0350452
ENSG00000167325-RRM1	193.829	-0.557794	0.178049	-3.13282	0.00173134	0.0352051
ENSG00000171988-JMJD1C	86.241	0.77884	0.248547	3.13357	0.00172692	0.0352051
ENSG00000235559-NOP56P1	54.7043	-0.875764	0.279532	-3.13297	0.00173049	0.0352051
ENSG00000276842-AC023510.2	61.1095	0.814445	0.259884	3.13388	0.0017251	0.0352051
ENSG00000274810-NPHP3-ACAD11	14.1559	1.7945	0.572954	3.13202	0.0017361	0.0352322
ENSG00000065328-MCM10	64.8475	-0.844904	0.26982	-3.13137	0.00173995	0.0352408
ENSG00000164236-ANKRD33B	37.3956	1.03137	0.329764	3.12761	0.00176232	0.0356239
ENSG00000131467-PSME3	74.6148	-0.77446	0.247801	-3.12533	0.00177604	0.0358308
ENSG00000170855-TRIAP1	67.191	-0.808318	0.258751	-3.12392	0.00178459	0.0359328
ENSG00000169230-PRELID1	103.284	-0.709233	0.22711	-3.12286	0.00179102	0.0359458
ENSG00000255031-AP002807.1	45.8402	1.10348	0.353379	3.12266	0.00179222	0.0359458
ENSG00000168653-NDUFS5	198.662	-0.571037	0.183018	-3.12012	0.0018078	0.0361877
ENSG00000075426-FOSL2	75.0546	0.75308	0.241516	3.11814	0.00181995	0.0362194
ENSG00000188486-H2AFX	49.2113	-1.02417	0.328447	-3.11822	0.0018195	0.0362194
ENSG00000230021-AL669831.3	254.299	0.549838	0.176288	3.11898	0.00181481	0.0362194
ENSG00000126749-EMG1	80.0247	-0.781841	0.25091	-3.11603	0.00183307	0.0364101
ENSG00000151725-CENPU	67.0162	-0.785127	0.252058	-3.11486	0.0018403	0.0364772
ENSG00000177694-NAALADL2	54.4653	0.902692	0.28985	3.11434	0.00184354	0.0364772
ENSG00000137563-GGH	56.2838	-0.879139	0.282476	-3.11226	0.0018566	0.0366651
ENSG00000141556-TBCD	79.9505	0.748325	0.240765	3.10811	0.00188289	0.0369494
ENSG00000143549-TPM3	254.623	-0.485849	0.156336	-3.10772	0.00188536	0.0369494
ENSG00000153551-CMTM7	170.6	-0.542659	0.174531	-3.10924	0.00187569	0.0369494
ENSG00000220205-VAMP2	21.9648	1.5364	0.494248	3.10855	0.00188005	0.0369494
ENSG00000087586-AURKA	55.1114	-0.847946	0.273072	-3.10521	0.00190147	0.0371943
ENSG00000139180-NDUFA9	86.396	-0.733044	0.236162	-3.10399	0.00190932	0.0372695
ENSG00000172296-SPTLC3	37.5162	1.01747	0.327848	3.10349	0.00191256	0.0372695
ENSG00000162490-DRAXIN	62.2582	-0.81436	0.262575	-3.10144	0.00192584	0.0374573
ENSG00000173575-CHD2	213.227	0.519401	0.167528	3.10039	0.00193264	0.0375188
ENSG00000072501-SMC1A	157.156	-0.57066	0.184237	-3.09743	0.00195207	0.0377536
ENSG00000169554-ZEB2	140.472	0.60361	0.194864	3.09759	0.00195098	0.0377536
ENSG00000229833-PET100	133.435	-0.602232	0.19454	-3.09567	0.00196369	0.037907
ENSG00000156411-ATP5MPL	308.16	-0.484211	0.156445	-3.09508	0.00196757	0.0379107
ENSG00000054148-PHPT1	68.2593	-0.776906	0.251481	-3.08932	0.00200617	0.0385822
ENSG00000059588-TARBP1	95.0087	0.704474	0.228416	3.08417	0.00204121	0.0391828
ENSG00000109084-TMEM97	112.943	-0.65174	0.211528	-3.08111	0.00206231	0.0395142
ENSG00000174306-ZHX3	23.0955	1.30659	0.424213	3.08004	0.00206971	0.0395823
ENSG00000104714-ERICH1	56.0106	0.871434	0.283153	3.07761	0.00208667	0.0396834
ENSG00000131504-DIAPH1	189.856	-0.565842	0.183889	-3.07707	0.00209043	0.0396834
ENSG00000173230-GOLGB1	95.9958	0.668829	0.217359	3.07707	0.00209043	0.0396834
ENSG00000198001-IRAK4	32.406	1.11188	0.361321	3.07727	0.00208907	0.0396834
ENSG00000132646-PCNA	75.4809	-0.842966	0.274053	-3.07592	0.00209855	0.0397642
ENSG00000177410-ZFAS1	411.548	0.537814	0.17492	3.07463	0.00210761	0.0398625
ENSG00000103034-NDRG4	30.8601	1.15505	0.376089	3.07122	0.00213183	0.0402466
ENSG00000265241-RBM8A	193.532	-0.519518	0.169213	-3.0702	0.00213913	0.0403105
ENSG00000125354-38961	322.96	-0.45486	0.148189	-3.06946	0.00214448	0.0403374
ENSG00000250186-AC091180.3	103.437	-0.662952	0.216293	-3.06506	0.00217624	0.0408601
ENSG00000180992-MRPL14	44.0103	-0.960782	0.31375	-3.06225	0.00219676	0.0411703
ENSG00000260423-LINC02367	17.3265	-1.63656	0.534562	-3.06149	0.00220238	0.0412004
ENSG00000107890-ANKRD26	77.0606	0.762428	0.249193	3.05958	0.00221646	0.0413887
ENSG00000182004-SNRPE	272.808	-0.514741	0.168413	-3.05643	0.00223992	0.0417509
ENSG00000109971-HSPA8	764.944	-0.416006	0.136349	-3.05104	0.00228051	0.0424307
ENSG00000142864-SERBP1	731.918	-0.344668	0.113025	-3.04948	0.00229241	0.042575
ENSG00000234327-AC012146.1	68.0856	-0.756292	0.248119	-3.0481	0.00230295	0.0426938
ENSG00000005206-SPPL2B	49.821	0.919277	0.301846	3.04551	0.00232284	0.0429851
ENSG00000114796-KLHL24	20.2565	1.42528	0.468365	3.0431	0.00234156	0.0431762
ENSG00000177971-IMP3	171.683	-0.590612	0.194075	-3.04321	0.00234068	0.0431762
ENSG00000103245-CIAO3	53.0729	0.910957	0.299611	3.04046	0.00236214	0.0434778
ENSG00000152061-RABGAP1L	182.59	-0.52893	0.173996	-3.0399	0.0023666	0.0434821
ENSG00000157456-CCNB2	43.1644	-0.923791	0.304682	-3.03198	0.00242952	0.0444003
ENSG00000161996-WDR90	73.4832	-0.789996	0.260504	-3.03257	0.00242482	0.0444003
ENSG00000205542-TMSB4X	1856.34	1.07802	0.355489	3.0325	0.00242541	0.0444003
ENSG00000136573-BLK	24.7239	1.28944	0.426058	3.02644	0.00247453	0.0449831
ENSG00000167461-RAB8A	44.8499	-0.908449	0.3001	-3.02716	0.00246866	0.0449831
ENSG00000223745-CCDC18-AS1	33.1971	1.09738	0.362565	3.02671	0.00247228	0.0449831
ENSG00000135245-HILPDA	57.9875	-0.820455	0.271153	-3.0258	0.00247975	0.0449984
ENSG00000130816-DNMT1	280.181	-0.44301	0.146527	-3.02339	0.00249957	0.0451978
ENSG00000147905-ZCCHC7	367.361	0.427875	0.141498	3.0239	0.00249539	0.0451978
ENSG00000162946-DISC1	15.9955	1.69749	0.56155	3.02287	0.00250391	0.0451978
ENSG00000134215-VAV3	67.9526	0.777872	0.257414	3.02188	0.00251214	0.0452669
ENSG00000168393-DTYMK	61.5039	-0.800051	0.264859	-3.02066	0.00252222	0.045369
ENSG00000151502-VPS26B	16.1311	1.59089	0.527329	3.01689	0.00255382	0.0457775
ENSG00000167085-PHB	105.463	-0.648983	0.215083	-3.01737	0.00254981	0.0457775
ENSG00000090266-NDUFB2	119.42	-0.635635	0.210812	-3.01517	0.00256834	0.0459577
ENSG00000104442-ARMC1	84.1014	-0.692802	0.230498	-3.00568	0.0026499	0.0473347
ENSG00000143476-DTL	61.3856	-0.856951	0.285181	-3.00494	0.00265635	0.0473677
ENSG00000113810-SMC4	520.133	-0.422431	0.140607	-3.00433	0.00266162	0.0473796
ENSG00000108179-PPIF	68.289	-0.743931	0.248003	-2.99968	0.00270263	0.0480265
ENSG00000162434-JAK1	65.414	0.774926	0.25839	2.99906	0.00270817	0.0480419
ENSG00000178741-COX5A	233.812	-0.510303	0.170272	-2.99699	0.00272662	0.0482861
ENSG00000137812-KNL1	73.231	-0.736791	0.245929	-2.99595	0.00273587	0.0483666
ENSG00000111602-TIMELESS	49.2115	-0.892852	0.298213	-2.99401	0.00275337	0.0485093
ENSG00000169021-UQCRFS1	81.755	-0.702164	0.234495	-2.99436	0.00275018	0.0485093
ENSG00000138778-CENPE	164.399	-0.526464	0.176311	-2.98599	0.00282662	0.0495453
ENSG00000140451-PIF1	39.2138	-1.05817	0.354288	-2.98676	0.00281948	0.0495453
ENSG00000176769-TCERG1L	19.4005	1.38094	0.462453	2.98612	0.0028254	0.0495453
ENSG00000171206-TRIM8	36.0871	1.019	0.341363	2.9851	0.00283486	0.0496052
ENSG00000140525-FANCI	85.2428	-0.677915	0.227183	-2.984	0.00284503	0.0496987
ENSG00000232119-MCTS1	53.7666	-0.91692	0.307515	-2.98171	0.00286643	0.0499877
ENSG00000116649-SRM	224.832	-0.487685	0.163646	-2.98012	0.00288139	0.0501635
ENSG00000117411-B4GALT2	99.61	-0.658398	0.220972	-2.97955	0.00288674	0.0501717
ENSG00000111665-CDCA3	26.7022	-1.17854	0.395843	-2.9773	0.00290799	0.0504559
ENSG00000213707-HMGB1P10	136.31	-0.553029	0.185881	-2.97519	0.0029281	0.0506863
ENSG00000224877-NDUFAF8	140.467	-0.595238	0.200089	-2.97487	0.00293113	0.0506863
ENSG00000260206-AC105020.2	145.983	-0.595814	0.200321	-2.9743	0.00293662	0.0506961
ENSG00000226179-LINC00685	126.733	0.605258	0.203652	2.97202	0.00295846	0.0509876
ENSG00000076108-BAZ2A	49.916	0.867758	0.292266	2.96907	0.00298703	0.051394
ENSG00000108064-TFAM	130.115	-0.607967	0.204875	-2.9675	0.0030023	0.0514844
ENSG00000154723-ATP5PF	215.597	-0.495065	0.166808	-2.96787	0.00299871	0.0514844
ENSG00000015133-CCDC88C	40.786	0.964719	0.325483	2.96396	0.00303703	0.0519934
ENSG00000179091-CYC1	156.482	-0.517311	0.174801	-2.95942	0.00308217	0.0526786
ENSG00000112576-CCND3	221.109	-0.467766	0.15813	-2.95811	0.00309536	0.0528163
ENSG00000129195-PIMREG	18.9987	-1.36304	0.462239	-2.94878	0.00319027	0.0543456
ENSG00000106829-TLE4	297.371	-0.473928	0.160777	-2.94774	0.00320105	0.0543491
ENSG00000131196-NFATC1	36.7594	0.977572	0.331587	2.94816	0.0031967	0.0543491
ENSG00000144824-PHLDB2	14.0668	-1.65939	0.563153	-2.9466	0.00321292	0.0544608
ENSG00000145703-IQGAP2	114.479	0.596994	0.202653	2.9459	0.00322021	0.05449
ENSG00000146083-RNF44	29.924	1.10455	0.375007	2.94541	0.00322523	0.05449
ENSG00000089280-FUS	634.278	-0.388333	0.13195	-2.94303	0.0032502	0.0547896
ENSG00000100138-SNU13	145.256	-0.539356	0.183286	-2.9427	0.00325361	0.0547896
ENSG00000135316-SYNCRIP	167.762	-0.519238	0.176702	-2.9385	0.00329805	0.0554472
ENSG00000134884-ARGLU1	586.304	0.414976	0.141288	2.9371	0.00331299	0.0556075
ENSG00000183570-PCBP3	34.6781	1.03477	0.352998	2.93137	0.00337469	0.0565508
ENSG00000124767-GLO1	40.3721	-0.976635	0.333389	-2.92941	0.00339605	0.0568161
ENSG00000002586-CD99	25.664	1.22691	0.418936	2.92864	0.00340454	0.0568657
ENSG00000221978-CCNL2	134.527	0.561097	0.191739	2.92636	0.00342949	0.0571896
ENSG00000126870-WDR60	50.2093	0.874619	0.299501	2.92025	0.00349752	0.0581358
ENSG00000210082-MT-RNR2	60992.4	0.380542	0.130311	2.92027	0.00349729	0.0581358
ENSG00000100376-FAM118A	79.783	0.79929	0.273771	2.91955	0.00350534	0.0581716
ENSG00000164087-POC1A	25.0019	-1.27552	0.437107	-2.9181	0.00352173	0.0583495
ENSG00000101849-TBL1X	58.1963	-0.898013	0.307793	-2.91758	0.00352754	0.0583519
ENSG00000247627-MTND4P12	256.558	0.470262	0.16122	2.91689	0.00353537	0.0583875
ENSG00000077942-FBLN1	21.8117	-1.29235	0.443238	-2.9157	0.00354893	0.0585176
ENSG00000100804-PSMB5	98.6876	-0.638082	0.219009	-2.91349	0.00357408	0.0588379
ENSG00000132763-MMACHC	727.377	-0.370873	0.127318	-2.91297	0.00358009	0.0588427
ENSG00000267136-AP005131.1	11.3643	1.87688	0.645735	2.90659	0.00365397	0.0599612
ENSG00000091490-SEL1L3	14.5299	1.62113	0.559249	2.89876	0.00374637	0.0611848
ENSG00000113013-HSPA9	147.298	-0.559991	0.193162	-2.89908	0.00374262	0.0611848
ENSG00000244270-RPL32P29	20.4085	1.34695	0.464632	2.89897	0.00374391	0.0611848
ENSG00000125676-THOC2	267.609	0.428607	0.14791	2.89776	0.0037584	0.061284
ENSG00000160948-VPS28	115.133	0.586542	0.202494	2.89659	0.00377243	0.0613183
ENSG00000214391-TUBAP2	55.5944	-0.89777	0.309892	-2.89705	0.00376695	0.0613183
ENSG00000077943-ITGA8	157.305	0.514525	0.178122	2.8886	0.00386957	0.0627981
ENSG00000173482-PTPRM	10.8884	1.83029	0.633821	2.8877	0.00388066	0.062879
ENSG00000130396-AFDN	99.7908	0.637599	0.220939	2.88585	0.00390353	0.0631196
ENSG00000176208-ATAD5	98.6739	-0.62383	0.216194	-2.88551	0.00390778	0.0631196
ENSG00000117139-KDM5B	141.214	0.590602	0.205175	2.87852	0.0039954	0.0644336
ENSG00000272933-AL391121.1	9.78207	1.91986	0.667966	2.87419	0.00405062	0.0652219
ENSG00000198937-CCDC167	36.933	-0.988743	0.344236	-2.87228	0.00407517	0.0655148
ENSG00000117450-PRDX1	746.738	-0.364886	0.12717	-2.86928	0.00411411	0.0660375
ENSG00000105677-TMEM147	66.1863	-0.735926	0.256701	-2.86686	0.0041457	0.0664409
ENSG00000091972-CD200	8.39126	2.08515	0.727788	2.86505	0.0041695	0.0667184
ENSG00000067066-SP100	65.1798	0.747746	0.261405	2.86049	0.00422982	0.0672653
ENSG00000070081-NUCB2	159.688	-0.51354	0.17947	-2.86142	0.00421746	0.0672653
ENSG00000163399-ATP1A1	84.0408	-0.649179	0.226943	-2.86054	0.00422925	0.0672653
ENSG00000221995-TIAF1	60.5395	0.768381	0.268503	2.86172	0.00421344	0.0672653
ENSG00000136238-RAC1	406.197	-0.388124	0.135756	-2.85898	0.00425004	0.0674826
ENSG00000110172-CHORDC1	50.0135	-0.833894	0.291928	-2.85651	0.00428328	0.0677158
ENSG00000135905-DOCK10	74.3576	0.716056	0.250677	2.85648	0.00428361	0.0677158
ENSG00000162062-TEDC2	14.5249	-1.54716	0.541643	-2.85642	0.00428448	0.0677158
ENSG00000119335-SET	1117.07	-0.324676	0.113716	-2.85516	0.00430155	0.0677775
ENSG00000235162-C12orf75	47.0292	-0.861943	0.301859	-2.85545	0.00429758	0.0677775
ENSG00000204574-ABCF1	145.84	-0.564834	0.198259	-2.84897	0.00438611	0.0690041
ENSG00000125691-RPL23	3271.78	0.335221	0.117806	2.84552	0.00443383	0.0695422
ENSG00000198168-SVIP	47.4521	-0.859507	0.302021	-2.84586	0.00442922	0.0695422
ENSG00000155629-PIK3AP1	55.2322	0.838044	0.294707	2.84365	0.00446	0.0696472
ENSG00000165349-SLC7A3	11.6964	-1.81572	0.63853	-2.84359	0.00446083	0.0696472
ENSG00000175711-B3GNTL1	61.2247	0.781711	0.274831	2.84433	0.00445049	0.0696472
ENSG00000162994-CLHC1	13.4981	1.69277	0.595546	2.84239	0.00447767	0.0698042
ENSG00000133119-RFC3	82.277	-0.652505	0.229644	-2.84137	0.00449197	0.0699212
ENSG00000125743-SNRPD2	378.394	-0.396369	0.13953	-2.84075	0.00450077	0.0699523
ENSG00000216937-CCDC7	16.177	1.44936	0.510679	2.8381	0.00453825	0.0704285
ENSG00000125995-ROMO1	275.754	-0.443097	0.156171	-2.83725	0.00455038	0.0705103
ENSG00000173674-EIF1AX	211.315	-0.504398	0.178043	-2.83301	0.00461122	0.0713457
ENSG00000279605-AC067930.6	502.565	-0.408322	0.144191	-2.8318	0.00462862	0.0714255
ENSG00000284773-AC114490.3	10.2618	1.85853	0.656331	2.83169	0.00463027	0.0714255
ENSG00000126457-PRMT1	176.039	-0.496313	0.175321	-2.83088	0.00464203	0.0714998
ENSG00000109586-GALNT7	46.8435	0.843567	0.298456	2.82644	0.00470686	0.0723899
ENSG00000134825-TMEM258	248.544	-0.437193	0.154774	-2.82471	0.00473232	0.0726728
ENSG00000262814-MRPL12	21.5237	-1.21569	0.431126	-2.8198	0.00480529	0.0736835
ENSG00000130164-LDLR	20.3851	-1.27486	0.452578	-2.81689	0.00484905	0.0742439
ENSG00000107957-SH3PXD2A	28.9244	1.0655	0.378732	2.81335	0.00490288	0.0747344
ENSG00000173141-MRPL57	102.282	-0.585835	0.208188	-2.81397	0.0048934	0.0747344
ENSG00000186350-RXRA	38.2264	0.956747	0.34004	2.81363	0.00489853	0.0747344
ENSG00000185787-MORF4L1	279.677	-0.437553	0.155634	-2.81143	0.00493224	0.0750707
ENSG00000145687-SSBP2	71.8521	0.693714	0.247035	2.80816	0.00498257	0.0757248
ENSG00000198712-MT-CO2	15466.6	0.334927	0.119397	2.80517	0.00502906	0.0763186
ENSG00000149547-EI24	115.202	-0.559234	0.199812	-2.7988	0.00512925	0.0777244
ENSG00000011304-PTBP1	251.958	-0.459334	0.164543	-2.79157	0.00524532	0.0793663
ENSG00000008952-SEC62	130.613	0.528413	0.189338	2.79085	0.00525699	0.0794261
ENSG00000182199-SHMT2	82.7161	-0.649692	0.233121	-2.78694	0.0053209	0.0802739
ENSG00000172301-COPRS	44.1147	-0.906031	0.325279	-2.7854	0.00534615	0.0805367
ENSG00000169288-MRPL1	72.3968	-0.674131	0.242101	-2.7845	0.00536097	0.0806418
ENSG00000157303-SUSD3	10.7507	1.77497	0.638085	2.78171	0.00540731	0.0811927
ENSG00000173456-RNF26	10.5386	-1.79023	0.643657	-2.78135	0.00541337	0.0811927
ENSG00000141076-UTP4	93.5841	-0.607602	0.218612	-2.77936	0.00544654	0.0814527
ENSG00000273344-PAXIP1-AS1	25.1094	1.14905	0.413387	2.77961	0.00544249	0.0814527
ENSG00000111328-CDK2AP1	177.222	-0.536615	0.193131	-2.77851	0.00546093	0.0815494
ENSG00000040275-SPDL1	50.3463	-0.805102	0.290219	-2.77412	0.00553515	0.082538
ENSG00000118762-PKD2	89.3594	0.69754	0.251571	2.77273	0.00555878	0.0827703
ENSG00000121691-CAT	47.9747	0.836521	0.302033	2.76964	0.00561187	0.0834401
ENSG00000011052-NME1-NME2	676.223	-0.331474	0.11975	-2.76804	0.0056394	0.0836077
ENSG00000245849-RAD51-AS1	11.0074	1.951	0.704807	2.76813	0.00563793	0.0836077
ENSG00000186493-C5orf38	45.0557	0.858881	0.310374	2.76724	0.00565329	0.083693
ENSG00000082515-MRPL22	47.0553	-0.852573	0.308607	-2.76265	0.00573351	0.084546
ENSG00000163597-SNHG16	218.362	-0.44654	0.161642	-2.76253	0.00573556	0.084546
ENSG00000283189-AC104452.1	14.3741	1.53996	0.557377	2.76287	0.0057295	0.084546
ENSG00000143771-CNIH4	84.2645	-0.635078	0.230171	-2.75916	0.00579496	0.0852995
ENSG00000004455-AK2	122.446	-0.552934	0.200443	-2.75856	0.00580561	0.0853342
ENSG00000064012-CASP8	44.0064	0.861956	0.312764	2.75593	0.00585258	0.085705
ENSG00000074071-MRPS34	100.021	-0.589595	0.213951	-2.75575	0.00585583	0.085705
ENSG00000137168-PPIL1	31.5012	-1.00186	0.363544	-2.75583	0.00585438	0.085705
ENSG00000113739-STC2	21.4351	-1.32874	0.482397	-2.75445	0.0058791	0.0859233
ENSG00000117395-EBNA1BP2	112.391	-0.577958	0.210197	-2.7496	0.00596671	0.0869568
ENSG00000120265-PCMT1	49.1968	-0.861796	0.31342	-2.74965	0.00596592	0.0869568
ENSG00000112578-BYSL	30.9604	-1.05798	0.385274	-2.74603	0.00603209	0.0877853
ENSG00000137265-IRF4	23.3667	1.19276	0.434607	2.74446	0.00606107	0.0878342
ENSG00000184441-AP001062.1	15.0832	1.41558	0.515635	2.74532	0.00604514	0.0878342
ENSG00000243678-NME2	673.765	-0.32527	0.118511	-2.74464	0.00605768	0.0878342
ENSG00000141682-PMAIP1	23.7673	-1.1663	0.425047	-2.74392	0.00607098	0.0878541
ENSG00000258199-AC073896.4	14.3178	1.50172	0.547404	2.74336	0.00608148	0.0878824
ENSG00000123933-MXD4	15.1467	1.48575	0.542284	2.7398	0.00614763	0.0887138
ENSG00000100219-XBP1	145.086	0.501586	0.183204	2.73785	0.00618416	0.0889079
ENSG00000176014-TUBB6	99.4026	-0.599055	0.218817	-2.7377	0.006187	0.0889079
ENSG00000185630-PBX1	356.58	0.420207	0.153453	2.73833	0.00617513	0.0889079
ENSG00000107140-TESK1	13.2232	1.52773	0.55825	2.73663	0.00620712	0.0890726
ENSG00000196782-MAML3	9.68598	1.84382	0.674383	2.73408	0.00625547	0.0896413
ENSG00000072832-CRMP1	26.429	1.1929	0.436439	2.73326	0.00627108	0.0897401
ENSG00000174442-ZWILCH	62.3901	-0.730207	0.267288	-2.73191	0.00629693	0.0899848
ENSG00000178177-LCORL	63.9877	-0.730622	0.267515	-2.73115	0.00631146	0.0900674
ENSG00000035403-VCL	50.7893	0.801023	0.293574	2.72852	0.00636197	0.0901301
ENSG00000047056-WDR37	8.88034	1.89805	0.695682	2.72832	0.00636571	0.0901301
ENSG00000084207-GSTP1	534.8	-0.362214	0.13275	-2.72854	0.00636151	0.0901301
ENSG00000108055-SMC3	182.808	-0.471223	0.172724	-2.72818	0.00636841	0.0901301
ENSG00000108671-PSMD11	175.111	-0.57119	0.20931	-2.72892	0.00635419	0.0901301
ENSG00000163535-SGO2	71.9842	-0.727713	0.266604	-2.72956	0.00634188	0.0901301
ENSG00000070756-PABPC1	3194.14	0.357235	0.130983	2.72734	0.00638476	0.0902374
ENSG00000170315-UBB	319.068	-0.440837	0.162009	-2.72107	0.00650714	0.0918409
ENSG00000078674-PCM1	240.39	0.415782	0.152846	2.72026	0.00652312	0.0919402
ENSG00000058804-NDC1	32.212	-0.965604	0.355202	-2.71846	0.00655856	0.0919703
ENSG00000086061-DNAJA1	135.673	-0.570226	0.209773	-2.7183	0.00656177	0.0919703
ENSG00000130766-SESN2	13.6653	-1.51626	0.55788	-2.71789	0.00656995	0.0919703
ENSG00000211584-SLC48A1	23.063	1.21194	0.445758	2.71883	0.00655126	0.0919703
ENSG00000234964-FABP5P7	48.8631	-0.813538	0.299325	-2.71791	0.00656949	0.0919703
ENSG00000105258-POLR2I	81.4266	-0.638198	0.235014	-2.71557	0.00661611	0.0924907
ENSG00000100387-RBX1	135.207	-0.572664	0.211149	-2.71213	0.00668528	0.0933309
ENSG00000265401-AC093484.3	310.752	-0.446475	0.164723	-2.71045	0.00671913	0.0936763
ENSG00000168159-RNF187	137.506	-0.523794	0.193291	-2.70988	0.00673083	0.0937124
ENSG00000061273-HDAC7	184.237	0.491156	0.181313	2.70889	0.00675084	0.093864
ENSG00000111716-LDHB	488.529	-0.375408	0.13864	-2.70779	0.00677319	0.0940478
ENSG00000107263-RAPGEF1	56.9351	0.740144	0.273516	2.70604	0.00680918	0.09442
ENSG00000104529-EEF1D	518.656	-0.379242	0.140246	-2.70413	0.00684843	0.0947091
ENSG00000167513-CDT1	46.2243	-0.816003	0.301722	-2.70448	0.00684108	0.0947091
ENSG00000158321-AUTS2	282.698	0.395732	0.14641	2.70291	0.00687356	0.094929
ENSG00000171848-RRM2	88.6257	-0.63388	0.234663	-2.70123	0.00690828	0.0952805
ENSG00000236762-RPL19P16	36.2132	1.16166	0.430485	2.6985	0.00696533	0.0959388
ENSG00000135624-CCT7	249.615	-0.467314	0.173209	-2.69798	0.00697612	0.0959589
ENSG00000003402-CFLAR	51.8113	0.76877	0.285098	2.69651	0.00700702	0.0962553
ENSG00000130770-ATP5IF1	126.923	-0.573694	0.212823	-2.69563	0.00702551	0.0963542
ENSG00000257950-P2RX5-TAX1BP3	119.984	-0.559407	0.207551	-2.69528	0.00703295	0.0963542
ENSG00000166797-CIAO2A	45.6042	-0.827771	0.307183	-2.69472	0.00704479	0.096388
ENSG00000080345-RIF1	205.542	-0.444061	0.164876	-2.6933	0.00707478	0.0966698
ENSG00000163728-TTC14	93.9825	0.659585	0.244939	2.69285	0.00708434	0.0966722
ENSG00000134283-PPHLN1	100.465	-0.575253	0.213848	-2.69	0.00714515	0.0973728
ENSG00000107447-DNTT	559.907	0.34337	0.12788	2.68509	0.00725113	0.0986864
ENSG00000137547-MRPL15	65.9502	-0.672055	0.250335	-2.68462	0.00726129	0.098694
ENSG00000279483-AC090498.1	367.247	0.361915	0.134905	2.68274	0.00730222	0.0991194
ENSG00000272398-CD24	174.107	0.474733	0.177039	2.68152	0.00732896	0.0993513
ENSG00000212694-LINC01089	29.2435	1.06273	0.396568	2.67981	0.00736636	0.099727
ENSG00000267740-AC024592.3	64.1966	-0.700443	0.261584	-2.6777	0.00741307	0.100227
ENSG00000088356-PDRG1	37.4829	-0.89056	0.333295	-2.67199	0.00754034	0.101505
ENSG00000111670-GNPTAB	48.3434	0.814039	0.304632	2.6722	0.00753557	0.101505
ENSG00000155380-SLC16A1	173.15	-0.4728	0.176967	-2.67169	0.00754705	0.101505
ENSG00000224593-AC092427.1	13.9965	1.43554	0.537141	2.67255	0.00752764	0.101505
ENSG00000118193-KIF14	51.8236	-0.760916	0.284858	-2.67121	0.00755788	0.101518
ENSG00000235423-AC068768.1	173.754	-0.529957	0.198429	-2.67076	0.00756803	0.101522
ENSG00000102786-INTS6	59.5909	0.714415	0.26768	2.66892	0.00760967	0.101948
ENSG00000145220-LYAR	48.5048	-0.76973	0.289627	-2.65766	0.00786857	0.105279
ENSG00000165359-INTS6L	14.8864	1.4683	0.552629	2.65693	0.00788554	0.105369
ENSG00000185864-NPIPB4	84.7208	0.672572	0.254028	2.64763	0.00810593	0.108174
ENSG00000126453-BCL2L12	53.7312	-0.78282	0.295774	-2.64668	0.00812861	0.108261
ENSG00000180773-SLC36A4	9.68912	-1.7638	0.666473	-2.64648	0.00813355	0.108261
ENSG00000012048-BRCA1	51.3603	-0.746464	0.282113	-2.64598	0.00814557	0.108281
ENSG00000184661-CDCA2	42.116	-0.819407	0.310048	-2.64284	0.0082214	0.109148
ENSG00000092201-SUPT16H	225.295	-0.424988	0.160911	-2.64113	0.00826291	0.109558
ENSG00000165732-DDX21	408.387	-0.372687	0.141165	-2.64008	0.00828867	0.109758
ENSG00000067225-PKM	304.579	-0.391231	0.148268	-2.63866	0.00832335	0.110054
ENSG00000129566-TEP1	9.60017	1.93101	0.731967	2.63812	0.00833683	0.110054
ENSG00000154839-SKA1	13.3657	-1.46973	0.557169	-2.63786	0.0083431	0.110054
ENSG00000239521-CASTOR3	16.9281	1.32897	0.503994	2.63686	0.00836762	0.110236
ENSG00000131558-EXOC4	57.5664	0.73072	0.277295	2.63517	0.00840955	0.110647
ENSG00000041357-PSMA4	230.923	-0.439416	0.166845	-2.63368	0.00844643	0.11099
ENSG00000160932-LY6E	29.9866	-0.987351	0.375278	-2.63099	0.00851372	0.111732
ENSG00000180525-PRR26	18.0801	1.2322	0.468804	2.62838	0.00857928	0.112449
ENSG00000122378-PRXL2A	42.8997	-0.800832	0.304806	-2.62735	0.0086052	0.112645
ENSG00000198837-DENND4B	33.1797	0.93308	0.355389	2.62552	0.00865167	0.113109
ENSG00000121892-PDS5A	81.3934	-0.602799	0.229717	-2.6241	0.00868791	0.113439
ENSG00000005075-POLR2J	82.0421	-0.631509	0.240847	-2.62204	0.00874057	0.113821
ENSG00000173894-CBX2	43.211	-0.812998	0.310045	-2.6222	0.0087365	0.113821
ENSG00000198885-ITPRIPL1	35.3969	-0.88483	0.337508	-2.62166	0.00875036	0.113821
ENSG00000115233-PSMD14	81.6783	-0.66987	0.255569	-2.62109	0.00876494	0.113867
ENSG00000154678-PDE1C	18.2978	1.21531	0.464225	2.61793	0.0088466	0.114703
ENSG00000196739-COL27A1	213.208	0.425031	0.162366	2.61773	0.00885164	0.114703
ENSG00000140905-GCSH	37.8299	-0.856462	0.327611	-2.61426	0.00894201	0.115438
ENSG00000245385-AP003396.1	10.1196	-1.70922	0.653788	-2.61434	0.00894005	0.115438
ENSG00000277978-AC010542.5	141.693	-0.570124	0.218062	-2.61451	0.00893568	0.115438
ENSG00000099341-PSMD8	130.007	-0.512691	0.196234	-2.61265	0.00898445	0.115628
ENSG00000198846-TOX	11.5184	1.55281	0.594235	2.61313	0.00897176	0.115628
ENSG00000231167-YBX1P2	60.0774	-0.688952	0.263765	-2.61199	0.00900164	0.115628
ENSG00000231607-DLEU2	47.959	-0.755165	0.289084	-2.61227	0.00899425	0.115628
ENSG00000124766-SOX4	636.277	-0.325337	0.124639	-2.61023	0.00904826	0.116013
ENSG00000125266-EFNB2	62.2988	0.705265	0.270216	2.61	0.00905414	0.116013
ENSG00000169020-ATP5ME	154.755	-0.507385	0.194659	-2.60653	0.00914647	0.116893
ENSG00000171992-SYNPO	20.8579	-1.13319	0.434682	-2.60693	0.00913581	0.116893
ENSG00000172888-ZNF621	17.4446	1.32181	0.507189	2.60614	0.00915691	0.116893
ENSG00000162894-FCMR	15.0147	1.4013	0.537833	2.60545	0.00917524	0.116982
ENSG00000173221-GLRX	46.0261	0.818032	0.314023	2.605	0.0091873	0.11699
ENSG00000164754-RAD21	295.495	-0.370191	0.142162	-2.60401	0.00921409	0.117042
ENSG00000174428-GTF2IRD2B	24.0745	1.05957	0.406882	2.60413	0.0092109	0.117042
ENSG00000266302-AC098850.3	9.45502	1.88968	0.725827	2.60349	0.00922798	0.117074
ENSG00000181722-ZBTB20	15.1272	1.37807	0.529403	2.60306	0.00923952	0.117076
ENSG00000132424-PNISR	279.834	0.437778	0.168274	2.60159	0.0092794	0.117436
ENSG00000105856-HBP1	12.8319	1.55661	0.598705	2.59996	0.00932333	0.117847
ENSG00000185477-GPRIN3	52.3101	0.795953	0.306572	2.5963	0.00942329	0.118965
ENSG00000127774-EMC6	103.402	-0.572638	0.220697	-2.59467	0.00946807	0.119384
ENSG00000180096-37135	17.3624	1.33281	0.51383	2.59387	0.00949018	0.119516
ENSG00000147649-MTDH	1128.05	-0.310782	0.119847	-2.59315	0.00951	0.119619
ENSG00000006756-ARSD	15.1716	1.33077	0.513431	2.59191	0.00954444	0.119759
ENSG00000285043-AC093512.2	177.08	-0.45825	0.176772	-2.59232	0.00953298	0.119759
ENSG00000211898-IGHD	48.4552	0.781291	0.301569	2.59075	0.00957672	0.120018
ENSG00000149925-ALDOA	177.341	-0.457265	0.176564	-2.5898	0.00960319	0.120203
ENSG00000140675-SLC5A2	22.3211	1.14507	0.442278	2.58902	0.00962488	0.120329
ENSG00000186814-ZSCAN30	14.2067	1.36767	0.528533	2.58768	0.00966245	0.120652
ENSG00000167004-PDIA3	147.592	-0.469371	0.181456	-2.58669	0.00969034	0.120853
ENSG00000003756-RBM5	129.048	0.527824	0.204161	2.58533	0.00972848	0.121035
ENSG00000257553-AC034102.4	161.081	-0.470529	0.18199	-2.58546	0.00972482	0.121035
ENSG00000101224-CDC25B	36.8189	-0.850053	0.329587	-2.57915	0.0099044	0.122779
ENSG00000135698-MPHOSPH6	126.474	-0.518782	0.201083	-2.57993	0.00988193	0.122779
ENSG00000149212-SESN3	12.7378	1.47676	0.572559	2.57922	0.00990237	0.122779
ENSG00000185650-ZFP36L1	303.167	-0.40682	0.157765	-2.57865	0.00991885	0.12281
ENSG00000046651-OFD1	111.037	0.54194	0.210384	2.57596	0.00999629	0.123135
ENSG00000053372-MRTO4	76.0327	-0.632231	0.245315	-2.57722	0.00995998	0.123135
ENSG00000104341-LAPTM4B	152.671	-0.518444	0.201302	-2.57545	0.0100111	0.123135
ENSG00000138032-PPM1B	40.1415	0.826671	0.320972	2.57552	0.010009	0.123135
ENSG00000160255-ITGB2	30.9088	-1.00465	0.390179	-2.57483	0.0100289	0.123135
ENSG00000186001-LRCH3	32.5345	0.92755	0.360103	2.57579	0.0100011	0.123135
ENSG00000264350-SNRPGP2	75.7811	-0.612491	0.237864	-2.57496	0.0100252	0.123135
ENSG00000142185-TRPM2	17.1637	1.33728	0.519537	2.57399	0.0100534	0.123159
ENSG00000175334-BANF1	103.101	-0.531207	0.206437	-2.57321	0.010076	0.123159
ENSG00000198728-LDB1	15.1464	1.33601	0.519219	2.57312	0.0100787	0.123159
ENSG00000243716-NPIPB5	190.397	0.458931	0.178328	2.57352	0.0100669	0.123159
ENSG00000214736-TOMM6	200.982	-0.452982	0.176093	-2.57241	0.0100994	0.123266
ENSG00000258153-HSPE1P4	51.0243	-0.770178	0.299473	-2.57178	0.0101178	0.123343
ENSG00000023734-STRAP	80.3603	-0.643452	0.250318	-2.57054	0.0101539	0.123638
ENSG00000151233-GXYLT1	17.6782	-1.2696	0.494749	-2.56616	0.0102832	0.124916
ENSG00000185651-UBE2L3	137.769	-0.502674	0.195871	-2.56635	0.0102776	0.124916
ENSG00000125885-MCM8	41.4847	-0.812817	0.317343	-2.56132	0.0104276	0.126521
ENSG00000112118-MCM3	139.056	-0.510125	0.199398	-2.55833	0.0105177	0.127302
ENSG00000149485-FADS1	108.813	-0.550192	0.215091	-2.55795	0.0105291	0.127302
ENSG00000259827-AC026461.1	106.768	1.77699	0.694587	2.55834	0.0105175	0.127302
ENSG00000146731-CCT6A	258.05	-0.389633	0.152406	-2.55654	0.0105719	0.12752
ENSG00000171791-BCL2	35.9742	-0.86948	0.340048	-2.55694	0.0105598	0.12752
ENSG00000134574-DDB2	18.3458	-1.2252	0.479711	-2.55405	0.0106479	0.128078
ENSG00000186834-HEXIM1	46.4104	0.828765	0.324574	2.55339	0.010668	0.128078
ENSG00000214021-TTLL3	30.3484	1.02474	0.40118	2.55432	0.0106394	0.128078
ENSG00000223642-AC008277.1	33.3266	1.0551	0.413194	2.55353	0.0106638	0.128078
ENSG00000261324-AC010168.2	10.7575	1.62843	0.638396	2.55081	0.0107473	0.12888
ENSG00000169684-CHRNA5	20.6956	-1.1823	0.464188	-2.54703	0.0108644	0.130132
ENSG00000088038-CNOT3	15.0217	1.30893	0.514088	2.54613	0.0108926	0.130318
ENSG00000137404-NRM	48.7025	-0.875104	0.344082	-2.5433	0.010981	0.131071
ENSG00000213970-AC006122.1	11.4972	-1.54336	0.606751	-2.54365	0.0109701	0.131071
ENSG00000160201-U2AF1	394.794	-0.377366	0.148444	-2.54213	0.0110178	0.131306
ENSG00000171320-ESCO2	26.3592	-1.03434	0.40692	-2.54187	0.0110262	0.131306
ENSG00000132604-TERF2	58.983	0.667269	0.262699	2.54005	0.0110837	0.131839
ENSG00000105011-ASF1B	42.9134	-0.783708	0.308614	-2.53944	0.011103	0.131915
ENSG00000124593-AL365205.1	205.604	-0.439734	0.173316	-2.53718	0.011175	0.132112
ENSG00000148308-GTF3C5	29.6662	-0.926275	0.36512	-2.5369	0.0111837	0.132112
ENSG00000167283-ATP5MG	695.308	-0.364443	0.143632	-2.53733	0.0111701	0.132112
ENSG00000204592-HLA-E	116.675	0.520592	0.205118	2.53801	0.0111485	0.132112
ENSG00000260266-PPIAP46	215.251	-0.452	0.17814	-2.53733	0.0111703	0.132112
ENSG00000108091-CCDC6	57.1806	0.680782	0.268495	2.53555	0.011227	0.13247
ENSG00000104980-TIMM44	47.6339	-0.798571	0.315238	-2.53323	0.0113015	0.133197
ENSG00000196262-PPIA	1686.29	-0.316762	0.125076	-2.53256	0.0113234	0.133303
ENSG00000132467-UTP3	62.3032	-0.72685	0.287055	-2.53209	0.0113383	0.133326
ENSG00000196655-TRAPPC4	82.443	-0.601601	0.237646	-2.5315	0.0113577	0.133401
ENSG00000170779-CDCA4	31.9583	-0.991035	0.39156	-2.53099	0.011374	0.13344
ENSG00000100162-CENPM	32.0947	-0.901193	0.356179	-2.53016	0.0114009	0.133604
ENSG00000166822-TMEM170A	27.8599	1.01307	0.400829	2.52744	0.0114896	0.13449
ENSG00000228929-RPS13P2	105.908	0.710938	0.281503	2.52551	0.0115531	0.13508
ENSG00000124181-PLCG1	43.6819	0.771515	0.305655	2.52414	0.0115983	0.135454
ENSG00000186300-ZNF555	8.95452	1.8081	0.716934	2.52199	0.0116695	0.13613
ENSG00000147133-TAF1	67.4827	0.628148	0.24914	2.52127	0.0116932	0.136223
ENSG00000164104-HMGB2	205.331	-0.551695	0.218844	-2.52095	0.0117039	0.136223
ENSG00000273604-EPOP	37.2759	-0.825728	0.327845	-2.51865	0.0117805	0.13696
ENSG00000167615-LENG8	63.4403	0.655972	0.260622	2.51694	0.0118378	0.137471
ENSG00000124207-CSE1L	82.5455	-0.637609	0.253479	-2.51544	0.0118885	0.137903
ENSG00000270757-HSPE1-MOB4	148	-0.608781	0.242113	-2.51445	0.0119218	0.138135
ENSG00000147274-RBMX	528.634	-0.316765	0.126029	-2.51344	0.0119561	0.138376
ENSG00000111669-TPI1	227.22	-0.405851	0.161534	-2.51248	0.0119887	0.138597
ENSG00000104889-RNASEH2A	41.174	-0.793841	0.316294	-2.50982	0.0120793	0.139488
ENSG00000168273-SMIM4	83.5064	0.568327	0.226512	2.50904	0.012106	0.13964
ENSG00000134419-RPS15A	2503.53	0.26762	0.10668	2.50863	0.0121202	0.139647
ENSG00000162063-CCNF	42.8284	-0.805829	0.321468	-2.50671	0.0121859	0.14009
ENSG00000183864-TOB2	32.9197	0.876966	0.34981	2.50698	0.0121769	0.14009
ENSG00000151240-DIP2C	34.0739	0.907013	0.362388	2.50288	0.0123188	0.14146
ENSG00000033800-PIAS1	66.1571	0.677963	0.27097	2.50198	0.0123499	0.141502
ENSG00000198763-MT-ND2	13101.4	0.345974	0.138266	2.50223	0.0123415	0.141502
ENSG00000124788-ATXN1	9.78145	1.64777	0.659196	2.49967	0.0124309	0.142271
ENSG00000204628-RACK1	1354.68	0.32018	0.12812	2.49907	0.0124518	0.142352
ENSG00000065548-ZC3H15	205.935	-0.421356	0.168667	-2.49815	0.0124842	0.142564
ENSG00000183624-HMCES	55.3054	0.884366	0.354366	2.49563	0.0125733	0.143422
ENSG00000115020-PIKFYVE	28.8628	0.973747	0.390285	2.49496	0.0125971	0.143535
ENSG00000127946-HIP1	23.495	1.04685	0.419697	2.49429	0.0126209	0.143646
ENSG00000156110-ADK	46.0762	-0.757997	0.304557	-2.48885	0.0128158	0.145704
ENSG00000153339-TRAPPC8	33.7963	0.9127	0.366993	2.48697	0.0128837	0.146153
ENSG00000160688-FLAD1	33.1742	-0.855802	0.344104	-2.48704	0.012881	0.146153
ENSG00000213347-MXD3	133.668	-0.497645	0.200212	-2.48559	0.0129337	0.146558
ENSG00000157927-RADIL	15.9415	1.28123	0.516456	2.48082	0.0131081	0.148371
ENSG00000141404-GNAL	8.68168	1.70399	0.687532	2.47841	0.0131968	0.149087
ENSG00000173209-AHSA2P	252.513	0.39334	0.158733	2.478	0.0132121	0.149087
ENSG00000255872-AL138752.2	128.911	-0.511569	0.20645	-2.47793	0.0132149	0.149087
ENSG00000143228-NUF2	73.4047	-0.617133	0.249283	-2.47564	0.0132999	0.149883
ENSG00000029993-HMGB3	64.6452	-0.653242	0.264052	-2.47391	0.0133643	0.150345
ENSG00000122952-ZWINT	46.33	-0.798301	0.322708	-2.47375	0.0133702	0.150345
ENSG00000075218-GTSE1	57.6787	-0.674311	0.272778	-2.47201	0.0134354	0.150749
ENSG00000130829-DUSP9	8.60571	-1.82986	0.740205	-2.4721	0.0134321	0.150749
ENSG00000114850-SSR3	113.986	-0.527195	0.213417	-2.47025	0.0135017	0.151184
ENSG00000149923-PPP4C	12.4995	1.69223	0.685057	2.4702	0.0135036	0.151184
ENSG00000087087-SRRT	208.376	-0.419671	0.170011	-2.46849	0.0135684	0.151745
ENSG00000213619-NDUFS3	173.211	-0.457008	0.185254	-2.46692	0.0136279	0.152245
ENSG00000166598-HSP90B1	532.555	-0.330973	0.134285	-2.46471	0.0137125	0.153024
ENSG00000163935-SFMBT1	51.6336	0.725855	0.29455	2.46428	0.0137288	0.153039
ENSG00000070018-LRP6	23.7605	1.05685	0.429216	2.46229	0.0138053	0.153726
ENSG00000162402-USP24	27.038	0.93723	0.380872	2.46075	0.0138648	0.153889
ENSG00000168496-FEN1	96.7735	-0.602931	0.244988	-2.46106	0.0138527	0.153889
ENSG00000267135-AD000091.1	21.9722	1.2032	0.488915	2.46097	0.0138564	0.153889
ENSG00000224505-AC138150.1	9.5105	1.67335	0.681803	2.45431	0.0141156	0.156503
ENSG00000270617-URGCP-MRPS24	65.7228	-0.648622	0.264609	-2.45125	0.0142363	0.157672
ENSG00000266714-MYO15B	14.4536	1.28306	0.52394	2.44886	0.014331	0.15855
ENSG00000076067-RBMS2	15.0166	1.31559	0.537564	2.44732	0.0143921	0.159056
ENSG00000188610-FAM72B	21.4267	-1.04829	0.428549	-2.44614	0.0144396	0.159409
ENSG00000122786-CALD1	373.912	0.37355	0.152882	2.44339	0.0145501	0.160456
ENSG00000153044-CENPH	30.0421	-0.925446	0.378876	-2.44261	0.0145815	0.160615
ENSG00000196081-ZNF724	11.6539	-1.42978	0.585435	-2.44226	0.0145957	0.160615
ENSG00000112182-BACH2	109.059	0.501073	0.205242	2.44138	0.0146313	0.160835
ENSG00000115241-PPM1G	111.242	-0.511932	0.209784	-2.44028	0.0146758	0.161152
ENSG00000130826-DKC1	271.44	-0.377081	0.15463	-2.4386	0.0147444	0.161634
ENSG00000168003-SLC3A2	86.1555	-0.56181	0.230398	-2.43843	0.0147511	0.161634
ENSG00000264112-AC015813.1	27.7215	0.939036	0.385483	2.436	0.0148506	0.162551
ENSG00000166801-FAM111A	101.898	-0.530299	0.217778	-2.43505	0.0148898	0.162807
ENSG00000204590-GNL1	25.2399	-0.977791	0.401891	-2.43297	0.0149754	0.163569
ENSG00000185684-EP400P1	53.1828	0.708611	0.291413	2.43164	0.0150308	0.164
ENSG00000161960-EIF4A1	346.331	-0.339417	0.139613	-2.43113	0.0150519	0.164057
ENSG00000100316-RPL3	1066.48	0.262007	0.107816	2.43014	0.0150932	0.164202
ENSG00000273841-TAF9	29.8403	-0.900526	0.370581	-2.43004	0.0150972	0.164202
ENSG00000205937-RNPS1	160.66	-0.430232	0.177093	-2.42941	0.0151232	0.164311
ENSG00000169679-BUB1	44.7193	-0.737959	0.304074	-2.42691	0.0152282	0.165103
ENSG00000230207-RPL4P5	30.2166	0.953894	0.393038	2.42698	0.0152251	0.165103
ENSG00000123360-PDE1B	11.0902	1.4777	0.609517	2.42437	0.015335	0.166086
ENSG00000138180-CEP55	34.271	-0.832286	0.34365	-2.4219	0.0154395	0.167042
ENSG00000185046-ANKS1B	53.7878	0.748691	0.309262	2.4209	0.0154823	0.167329
ENSG00000259781-HMGB1P6	310.133	-0.338911	0.140136	-2.41845	0.0155869	0.168283
ENSG00000076003-MCM6	60.3983	-0.660019	0.273114	-2.41664	0.0156645	0.168943
ENSG00000072506-HSD17B10	26.7683	-0.951973	0.394135	-2.41535	0.0157202	0.169013
ENSG00000088833-NSFL1C	38.8891	-0.812844	0.336466	-2.41583	0.0156996	0.169013
ENSG00000136492-BRIP1	24.9639	-1.00108	0.414429	-2.41556	0.0157109	0.169013
ENSG00000020922-MRE11	74.4302	-0.587108	0.243328	-2.41282	0.0158295	0.169683
ENSG00000082458-DLG3	18.6344	-1.17085	0.485273	-2.41276	0.0158321	0.169683
ENSG00000134809-TIMM10	76.0893	-0.61479	0.254787	-2.41296	0.0158236	0.169683
ENSG00000106305-AIMP2	71.7785	-0.583993	0.242237	-2.41084	0.015916	0.170229
ENSG00000130449-ZSWIM6	39.1058	0.788705	0.327104	2.41117	0.0159012	0.170229
ENSG00000258554-AC025162.1	31.2456	-0.863304	0.358156	-2.41041	0.0159345	0.170249
ENSG00000108829-LRRC59	59.178	-0.645836	0.267986	-2.40997	0.0159539	0.17028
ENSG00000091436-MAP3K20	75.9735	-0.56574	0.234804	-2.40942	0.015978	0.170361
ENSG00000123485-HJURP	51.5669	-0.681683	0.283064	-2.40823	0.0160301	0.170739
ENSG00000275342-PRAG1	16.9476	1.189	0.494029	2.40674	0.0160954	0.171257
ENSG00000095015-MAP3K1	290.109	0.355149	0.147913	2.40106	0.0163477	0.173583
ENSG00000169926-KLF13	21.9653	1.04678	0.435956	2.40112	0.0163449	0.173583
ENSG00000123219-CENPK	37.8754	-0.794916	0.331303	-2.39936	0.0164237	0.17403
ENSG00000165283-STOML2	84.6699	-0.5573	0.232263	-2.39944	0.0164202	0.17403
ENSG00000164329-TENT2	20.3329	1.05269	0.439786	2.39365	0.0166817	0.176582
ENSG00000149311-ATM	62.1867	0.674329	0.282146	2.39	0.0168482	0.178093
ENSG00000165792-METTL17	44.2172	0.769587	0.322034	2.38977	0.016859	0.178093
ENSG00000197299-BLM	44.7119	-0.764924	0.320167	-2.38914	0.0168879	0.178215
ENSG00000175938-ORAI3	10.6658	1.46225	0.61244	2.38758	0.0169596	0.178788
ENSG00000099904-ZDHHC8	28.7114	0.957022	0.401196	2.38542	0.0170597	0.179469
ENSG00000174405-LIG4	11.5739	1.41429	0.592848	2.38559	0.0170516	0.179469
ENSG00000175768-TOMM5	138.912	-0.486644	0.204039	-2.38506	0.0170765	0.179469
ENSG00000062582-MRPS24	65.6276	-0.633039	0.265633	-2.38313	0.0171661	0.179606
ENSG00000095739-BAMBI	9.47803	-1.56919	0.65824	-2.38391	0.0171297	0.179606
ENSG00000131018-SYNE1	17.7432	1.12514	0.472247	2.38253	0.0171943	0.179606
ENSG00000147421-HMBOX1	29.6087	0.933747	0.391869	2.3828	0.0171815	0.179606
ENSG00000176834-VSIG10	36.1872	0.784696	0.329156	2.38397	0.0171271	0.179606
ENSG00000182372-CLN8	18.2071	1.15728	0.485709	2.38267	0.0171876	0.179606
ENSG00000088832-FKBP1A	163.696	-0.421489	0.177073	-2.38032	0.0172977	0.180156
ENSG00000160208-RRP1B	128.517	-0.481193	0.20216	-2.38026	0.0173005	0.180156
ENSG00000160223-ICOSLG	31.6772	0.876857	0.368442	2.37991	0.017317	0.180156
ENSG00000184110-EIF3C	161.572	-0.418848	0.175917	-2.38094	0.0172684	0.180156
ENSG00000183662-FAM19A1	14.5921	1.29716	0.545272	2.37891	0.0173638	0.18046
ENSG00000164190-NIPBL	184.304	0.410288	0.172573	2.37747	0.0174316	0.180983
ENSG00000116679-IVNS1ABP	86.4538	-0.53336	0.224649	-2.37419	0.0175875	0.182417
ENSG00000105197-TIMM50	52.0541	-0.734809	0.309733	-2.3724	0.017673	0.183119
ENSG00000177025-C19orf18	14.5291	1.27042	0.535619	2.37187	0.0176982	0.183196
ENSG00000155749-ALS2CR12	9.71428	1.52526	0.643358	2.37079	0.0177503	0.18355
ENSG00000182512-GLRX5	182.073	-0.437759	0.184698	-2.37013	0.0177818	0.183691
ENSG00000106462-EZH2	175.56	-0.408545	0.172411	-2.36959	0.0178077	0.183774
ENSG00000058063-ATP11B	30.5828	0.854937	0.361159	2.36721	0.0179229	0.184401
ENSG00000158710-TAGLN2	139.317	-0.452322	0.191053	-2.36752	0.0179078	0.184401
ENSG00000198399-ITSN2	74.4753	0.587947	0.248409	2.36685	0.01794	0.184401
ENSG00000213648-SULT1A4	19.6649	1.10372	0.46619	2.36752	0.0179076	0.184401
ENSG00000065978-YBX1	724.574	-0.317452	0.134156	-2.3663	0.017967	0.184494
ENSG00000085224-ATRX	306.156	0.342441	0.144762	2.36554	0.0180038	0.184687
ENSG00000140688-C16orf58	22.9614	1.03206	0.436628	2.3637	0.0180934	0.184869
ENSG00000170011-MYRIP	10.8834	1.45252	0.614447	2.36395	0.0180811	0.184869
ENSG00000198624-CCDC69	98.8792	-0.524739	0.221899	-2.36477	0.0180414	0.184869
ENSG00000223519-KIF28P	45.1857	0.713545	0.301812	2.3642	0.0180689	0.184869
ENSG00000010295-IFFO1	22.8652	1.01609	0.430192	2.36194	0.0181794	0.18546
ENSG00000124795-DEK	357.744	-0.335367	0.141997	-2.36178	0.0181873	0.18546
ENSG00000136938-ANP32B	312.664	-0.368286	0.155984	-2.36105	0.0182234	0.185644
ENSG00000204217-BMPR2	31.8794	0.851558	0.360757	2.36048	0.0182515	0.185747
ENSG00000165916-PSMC3	78.0042	-0.566051	0.239902	-2.35951	0.0182991	0.186047
ENSG00000076928-ARHGEF1	35.1143	0.801228	0.339777	2.3581	0.0183687	0.18657
ENSG00000280385-AP000648.3	17.7586	-1.1282	0.478516	-2.3577	0.0183885	0.186587
ENSG00000174744-BRMS1	23.4349	-1.00834	0.42793	-2.35632	0.0184572	0.1871
ENSG00000173473-SMARCC1	339.79	-0.327588	0.139048	-2.35594	0.0184759	0.187105
ENSG00000264772-AC016876.2	322.85	-0.335788	0.142572	-2.35522	0.018512	0.187286
ENSG00000136942-RPL35	1422.96	-0.305785	0.129868	-2.35459	0.0185433	0.187418
ENSG00000179950-PUF60	67.2988	-0.606743	0.257795	-2.35358	0.0185935	0.187741
ENSG00000069424-KCNAB2	23.8344	0.984017	0.418235	2.35278	0.0186334	0.187776
ENSG00000213918-DNASE1	112.714	-0.502841	0.213712	-2.3529	0.0186278	0.187776
ENSG00000118513-MYB	234.091	0.36117	0.153531	2.35242	0.0186517	0.187777
ENSG00000152620-NADK2	34.0048	-0.844375	0.35918	-2.35084	0.018731	0.18839
ENSG00000100664-EIF5	149.794	-0.432863	0.184257	-2.34923	0.0188123	0.189023
ENSG00000134291-TMEM106C	36.94	-0.836448	0.356248	-2.34793	0.0188779	0.189497
ENSG00000189431-RASSF10	11.8144	1.4268	0.608073	2.34643	0.0189545	0.190081
ENSG00000197894-ADH5	66.5409	-0.665925	0.284418	-2.34136	0.0192137	0.192493
ENSG00000153157-SYCP2L	53.3092	0.641128	0.273908	2.34067	0.0192493	0.192661
ENSG00000125844-RRBP1	87.0154	0.528001	0.225755	2.33882	0.0193446	0.193427
ENSG00000013441-CLK1	58.4721	0.66431	0.284204	2.33744	0.0194165	0.193463
ENSG00000134697-GNL2	110.515	-0.467559	0.200121	-2.33638	0.0194717	0.193463
ENSG00000137177-KIF13A	18.7989	1.10201	0.471312	2.33818	0.0193777	0.193463
ENSG00000166349-RAG1	31.9154	0.871207	0.373258	2.33406	0.0195926	0.193463
ENSG00000175727-MLXIP	93.7669	0.509596	0.218096	2.33656	0.0194619	0.193463
ENSG00000179958-DCTPP1	52.9097	-0.71665	0.306535	-2.3379	0.0193923	0.193463
ENSG00000185432-METTL7A	22.0527	1.01599	0.435215	2.33445	0.0195719	0.193463
ENSG00000203760-CENPW	21.7194	-1.02592	0.439018	-2.33686	0.0194466	0.193463
ENSG00000230457-PA2G4P4	71.5995	-0.594228	0.254473	-2.33514	0.0195363	0.193463
ENSG00000251503-CENPS-CORT	40.4514	-0.774787	0.331932	-2.33418	0.0195865	0.193463
ENSG00000267206-LCN6	12.4522	1.35027	0.578506	2.33406	0.0195925	0.193463
ENSG00000284526-AC015802.6	191.228	-0.393984	0.168671	-2.33581	0.0195009	0.193463
__no_feature-	609017	0.312425	0.133756	2.33579	0.0195022	0.193463
ENSG00000173611-SCAI	14.3719	1.29265	0.554057	2.33306	0.0196451	0.193795
ENSG00000243927-MRPS6	45.3722	-0.747365	0.320461	-2.33216	0.0196923	0.194075
ENSG00000159842-ABR	18.3232	1.14811	0.492643	2.3305	0.0197796	0.194626
ENSG00000275183-LENG9	59.6926	0.623281	0.267459	2.33038	0.0197861	0.194626
ENSG00000152767-FARP1	205.898	0.374718	0.160851	2.32959	0.0198277	0.194849
ENSG00000111247-RAD51AP1	43.2634	-0.745363	0.320047	-2.32892	0.0198636	0.195015
ENSG00000169499-PLEKHA2	48.2354	0.673077	0.289125	2.32798	0.019913	0.195315
ENSG00000141741-MIEN1	58.7386	-0.616347	0.264818	-2.32743	0.0199421	0.195414
ENSG00000224861-YBX1P1	78.7273	-0.574598	0.246924	-2.32702	0.019964	0.195442
ENSG00000104343-UBE2W	16.5189	1.15886	0.498425	2.32505	0.0200692	0.195929
ENSG00000139722-VPS37B	30.692	0.933671	0.401575	2.32502	0.0200708	0.195929
ENSG00000167515-TRAPPC2L	63.2088	-0.594672	0.255716	-2.32551	0.0200445	0.195929
ENSG00000122873-CISD1	98.1834	-0.506844	0.218275	-2.32204	0.0202305	0.197196
ENSG00000242861-AL591895.1	8.89738	1.67584	0.721756	2.32189	0.020239	0.197196
ENSG00000108559-NUP88	63.4667	-0.610834	0.263363	-2.31936	0.0203754	0.197617
ENSG00000144136-SLC20A1	107.034	-0.508473	0.219235	-2.31931	0.0203783	0.197617
ENSG00000175322-ZNF519	26.7652	-0.89747	0.386894	-2.31968	0.0203584	0.197617
ENSG00000176945-MUC20	13.1536	1.26781	0.546615	2.31939	0.0203741	0.197617
ENSG00000179912-R3HDM2	80.1591	0.557755	0.240401	2.3201	0.0203355	0.197617
ENSG00000107362-ABHD17B	40.528	0.766999	0.330887	2.31801	0.0204488	0.198114
ENSG00000127022-CANX	286.058	-0.348388	0.150344	-2.31728	0.0204886	0.198314
ENSG00000198840-MT-ND3	10762	0.297607	0.128475	2.31646	0.0205331	0.198448
ENSG00000258465-AL139011.2	44.1698	0.727459	0.314059	2.31632	0.020541	0.198448
ENSG00000185627-PSMD13	85.9301	-0.517469	0.223499	-2.31531	0.0205959	0.198605
ENSG00000269246-AC011445.2	11.0058	1.39328	0.60169	2.31561	0.0205797	0.198605
ENSG00000116604-MEF2D	55.8081	0.651704	0.281628	2.31406	0.0206642	0.19889
ENSG00000144224-UBXN4	147.441	0.436193	0.188485	2.31421	0.0206561	0.19889
ENSG00000123975-CKS2	56.1072	-0.650987	0.28153	-2.31232	0.0207602	0.19907
ENSG00000167799-NUDT8	8.34485	-1.72537	0.746128	-2.31244	0.0207537	0.19907
ENSG00000183049-CAMK1D	73.0932	0.640922	0.277118	2.31281	0.0207329	0.19907
ENSG00000197102-DYNC1H1	207.113	-0.378951	0.163841	-2.31291	0.0207274	0.19907
ENSG00000130309-COLGALT1	97.5083	-0.495422	0.214368	-2.31108	0.0208282	0.19935
ENSG00000156970-BUB1B	60.3723	-0.621658	0.268963	-2.31131	0.0208156	0.19935
ENSG00000172590-MRPL52	90.2578	-0.507316	0.219586	-2.31033	0.0208699	0.199563
ENSG00000126860-EVI2A	24.1938	0.987895	0.427712	2.30972	0.0209036	0.199616
ENSG00000131016-AKAP12	332.39	-0.333019	0.144193	-2.30953	0.0209142	0.199616
ENSG00000116830-TTF2	83.3822	-0.529461	0.229351	-2.30852	0.0209702	0.199965
ENSG00000271270-TMCC1-AS1	15.8098	1.17464	0.508985	2.30781	0.0210096	0.200156
ENSG00000080839-RBL1	26.1365	-0.93073	0.403386	-2.30729	0.0210385	0.200245
ENSG00000165102-HGSNAT	9.93361	1.50104	0.650897	2.30611	0.0211044	0.200687
ENSG00000236287-ZBED5	37.4177	0.75624	0.328001	2.3056	0.0211329	0.200772
ENSG00000100364-KIAA0930	32.8242	-0.841266	0.365145	-2.30393	0.0212268	0.201478
ENSG00000174695-TMEM167A	29.832	-0.836698	0.363298	-2.30306	0.0212753	0.201567
ENSG00000256966-AL513165.2	54.3491	-0.645932	0.280446	-2.30323	0.0212657	0.201567
ENSG00000152147-GEMIN6	18.7967	-1.13749	0.494365	-2.30092	0.0213961	0.202339
ENSG00000199377-RNU5F-1	86.0803	0.638495	0.277489	2.30097	0.0213933	0.202339
ENSG00000205639-MFSD2B	13.9252	-1.23463	0.536888	-2.29961	0.0214702	0.202853
ENSG00000005483-KMT2E	268.672	0.36765	0.160092	2.29649	0.0216477	0.204342
ENSG00000078668-VDAC3	125.155	-0.450791	0.19654	-2.29364	0.0218111	0.205568
ENSG00000127337-YEATS4	119.02	-0.451954	0.197056	-2.29353	0.0218175	0.205568
ENSG00000068137-PLEKHH3	21.4576	1.01247	0.441901	2.29118	0.021953	0.206478
ENSG00000116815-CD58	84.6693	0.517197	0.225736	2.29116	0.0219542	0.206478
ENSG00000198625-MDM4	233.949	0.378899	0.165408	2.2907	0.0219811	0.206542
ENSG00000115232-ITGA4	49.0912	-0.7622	0.332962	-2.28915	0.0220707	0.207195
ENSG00000114023-FAM162A	74.3363	-0.550481	0.240643	-2.28754	0.0221641	0.207882
ENSG00000142453-CARM1	126.625	-0.450198	0.196855	-2.28696	0.0221984	0.208014
ENSG00000278791-MIR6723	80.882	0.534018	0.233573	2.2863	0.0222365	0.208182
ENSG00000095002-MSH2	53.8526	-0.637912	0.279465	-2.28262	0.0224529	0.210016
ENSG00000237441-RGL2	15.7982	1.23429	0.541084	2.28114	0.0225403	0.210642
ENSG00000101003-GINS1	22.4679	-0.955522	0.419194	-2.27943	0.0226418	0.211016
ENSG00000137331-IER3	16.6992	-1.09951	0.482351	-2.27948	0.0226386	0.211016
ENSG00000272273-IER3-AS1	16.6992	-1.09951	0.482351	-2.27948	0.0226386	0.211016
ENSG00000101638-ST8SIA5	13.7728	1.23158	0.540787	2.27739	0.0227628	0.211914
ENSG00000168710-AHCYL1	214.484	-0.37034	0.162636	-2.27712	0.0227793	0.211914
ENSG00000177700-POLR2L	157.058	-0.424863	0.186629	-2.27651	0.0228154	0.212058
ENSG00000135404-CD63	258.856	-0.355119	0.15606	-2.27552	0.0228747	0.212417
ENSG00000140853-NLRC5	65.0161	0.607817	0.267162	2.27509	0.0229004	0.212464
ENSG00000108826-MRPL27	57.4715	-0.618692	0.27211	-2.27369	0.0229848	0.212727
ENSG00000136108-CKAP2	45.9683	-0.680212	0.299095	-2.27423	0.0229522	0.212727
ENSG00000275895-U2AF1L5	373.158	-0.350663	0.154233	-2.27359	0.0229908	0.212727
ENSG00000165480-SKA3	24.099	-0.921156	0.405273	-2.27292	0.0230307	0.212905
ENSG00000175582-RAB6A	28.3121	0.863511	0.380774	2.26778	0.0233426	0.215594
ENSG00000163644-PPM1K	44.8044	0.671509	0.29616	2.26738	0.0233669	0.215625
ENSG00000187187-ZNF546	9.16282	1.52494	0.673223	2.26513	0.0235046	0.216702
ENSG00000153827-TRIP12	81.868	0.520065	0.22992	2.26194	0.0237012	0.218227
ENSG00000188177-ZC3H6	9.35511	1.51093	0.668033	2.26176	0.0237124	0.218227
ENSG00000160058-BSDC1	25.8487	1.02747	0.454461	2.26085	0.0237685	0.218547
ENSG00000265354-TIMM23	36.0842	-0.806343	0.356896	-2.25932	0.0238632	0.219222
ENSG00000143061-IGSF3	11.755	-1.30553	0.578124	-2.25821	0.0239323	0.219661
ENSG00000285077-ARHGAP11B	26.8179	-0.943199	0.417758	-2.25776	0.0239605	0.219724
ENSG00000170860-LSM3	84.8667	-0.508488	0.225419	-2.25575	0.0240864	0.220681
ENSG00000100592-DAAM1	50.9059	0.644594	0.285969	2.25407	0.0241917	0.221056
ENSG00000110492-MDK	119.598	-0.437524	0.194097	-2.25415	0.0241867	0.221056
ENSG00000237940-LINC01238	12.0487	1.29583	0.574865	2.25415	0.024187	0.221056
ENSG00000133961-NUMB	26.0314	0.889348	0.394625	2.25366	0.0242178	0.221098
ENSG00000153317-ASAP1	125.415	0.456366	0.202622	2.25231	0.0243029	0.221678
ENSG00000134452-FBH1	29.7301	0.852312	0.378863	2.24966	0.0244707	0.222662
ENSG00000240053-LY6G5B	13.6363	-1.2397	0.551082	-2.24958	0.0244757	0.222662
ENSG00000263843-AC022211.2	20.6015	-1.01636	0.451758	-2.24979	0.0244623	0.222662
ENSG00000096093-EFHC1	14.4816	1.21392	0.539814	2.24878	0.0245264	0.222926
ENSG00000149657-LSM14B	62.8712	0.584033	0.259884	2.24729	0.0246216	0.223594
ENSG00000008018-PSMB1	176.732	-0.399434	0.177894	-2.24534	0.024746	0.223614
ENSG00000105443-CYTH2	34.1262	0.758094	0.337636	2.2453	0.024749	0.223614
ENSG00000148834-GSTO1	128.761	-0.464603	0.206842	-2.24617	0.0246931	0.223614
ENSG00000163507-CIP2A	74.2798	-0.564008	0.2512	-2.24526	0.0247517	0.223614
ENSG00000196924-FLNA	75.8546	-0.557546	0.248229	-2.24609	0.024698	0.223614
ENSG00000205323-SARNP	118.1	-0.448007	0.199539	-2.24522	0.0247542	0.223614
ENSG00000134684-YARS	97.078	-0.502895	0.224104	-2.24402	0.024831	0.223934
ENSG00000174371-EXO1	18.6249	-1.03082	0.459438	-2.24365	0.024855	0.223934
ENSG00000262074-SNORD3B-2	32.1502	1.04124	0.464054	2.24379	0.0248459	0.223934
ENSG00000189306-RRP7A	49.9704	-0.658088	0.293388	-2.24306	0.0248928	0.224079
ENSG00000281344-HELLPAR	38.3296	-0.758964	0.338458	-2.24242	0.0249344	0.224257
ENSG00000025772-TOMM34	30.8719	-0.818206	0.364969	-2.24185	0.0249713	0.224393
ENSG00000138363-ATIC	130.939	-0.418912	0.186906	-2.2413	0.0250065	0.224513
ENSG00000089289-IGBP1	54.653	0.649847	0.290247	2.23894	0.0251596	0.225645
ENSG00000143575-HAX1	66.14	-0.557977	0.249243	-2.23868	0.0251765	0.225645
ENSG00000134954-ETS1	18.9699	1.01948	0.45567	2.23732	0.0252656	0.226247
ENSG00000227953-LINC01341	20.054	1.0299	0.460455	2.2367	0.0253056	0.226408
ENSG00000119403-PHF19	44.325	-0.707833	0.316605	-2.2357	0.0253716	0.226658
ENSG00000284491-THSD8	32.7232	-0.789792	0.353279	-2.23561	0.0253776	0.226658
ENSG00000184009-ACTG1	2909.21	0.319867	0.143102	2.23524	0.0254017	0.226676
ENSG00000110955-ATP5F1B	307.087	-0.358828	0.160682	-2.23316	0.0255385	0.2277
ENSG00000100889-PCK2	27.9878	-0.848293	0.38066	-2.22848	0.0258486	0.229706
ENSG00000102755-FLT1	66.169	0.574905	0.257953	2.22872	0.0258326	0.229706
ENSG00000119408-NEK6	19.3062	-1.1116	0.498828	-2.22842	0.0258528	0.229706
ENSG00000122042-UBL3	17.3101	1.06429	0.477498	2.22889	0.0258211	0.229706
ENSG00000090861-AARS	92.5515	-0.527206	0.236981	-2.22468	0.0261027	0.231726
ENSG00000130733-YIPF2	127.158	-0.435344	0.195851	-2.22284	0.0262267	0.232426
ENSG00000131669-NINJ1	10.6667	-1.38048	0.621035	-2.22288	0.0262242	0.232426
ENSG00000136522-MRPL47	49.3295	-0.653429	0.294017	-2.22242	0.0262549	0.232476
ENSG00000132846-ZBED3	22.9106	-0.911112	0.410269	-2.22077	0.0263667	0.233065
ENSG00000183691-NOG	15.5352	-1.12623	0.507128	-2.2208	0.0263646	0.233065
ENSG00000178921-PFAS	46.5823	-0.664952	0.299523	-2.22004	0.0264163	0.233302
ENSG00000254741-AC067930.2	296.608	-0.356714	0.160728	-2.21936	0.0264623	0.233508
ENSG00000149503-INCENP	19.4582	-1.02812	0.463346	-2.21891	0.026493	0.233579
ENSG00000020426-MNAT1	13.1146	1.20639	0.543995	2.21766	0.0265783	0.234126
ENSG00000134222-PSRC1	12.9142	-1.22813	0.553876	-2.21733	0.0266006	0.234126
ENSG00000105810-CDK6	56.2189	0.630861	0.284904	2.21429	0.0268087	0.234587
ENSG00000108344-PSMD3	140.089	-0.416926	0.188212	-2.21519	0.026747	0.234587
ENSG00000172965-MIR4435-2HG	12.2631	1.26799	0.572458	2.21498	0.0267611	0.234587
ENSG00000175287-PHYHD1	20.1262	0.972001	0.438655	2.21587	0.0267005	0.234587
ENSG00000224078-SNHG14	68.8335	0.572013	0.258267	2.21482	0.0267727	0.234587
ENSG00000250182-EEF1A1P13	34.545	0.926966	0.418639	2.21424	0.0268126	0.234587
ENSG00000267679-EIF5AP2	31.8256	-0.817338	0.369041	-2.21476	0.0267764	0.234587
ENSG00000094804-CDC6	38.8155	-0.727697	0.328719	-2.21373	0.0268471	0.23469
ENSG00000165704-HPRT1	24.306	-0.900285	0.406953	-2.21226	0.0269487	0.235378
ENSG00000159256-MORC3	11.5807	1.41707	0.64089	2.2111	0.0270289	0.235878
ENSG00000119801-YPEL5	10.4264	1.38057	0.624915	2.20922	0.0271595	0.236735
ENSG00000185896-LAMP1	74.2205	-0.551597	0.249702	-2.20902	0.0271731	0.236735
ENSG00000205208-C4orf46	11.7783	-1.36032	0.615968	-2.20843	0.0272143	0.236893
ENSG00000175166-PSMD2	106.594	-0.461448	0.20899	-2.20799	0.027245	0.23696
ENSG00000101187-SLCO4A1	27.6235	-0.988585	0.448122	-2.20606	0.0273795	0.237929
ENSG00000285976-AL135905.2	73.3638	-0.553966	0.251158	-2.20565	0.0274083	0.237978
ENSG00000113240-CLK4	19.6999	0.979919	0.444371	2.20518	0.0274412	0.238063
ENSG00000130779-CLIP1	67.4747	0.549548	0.249284	2.20451	0.0274888	0.238107
ENSG00000140854-KATNB1	47.9833	-0.637856	0.289349	-2.20445	0.0274925	0.238107
ENSG00000148153-INIP	25.4165	-0.890882	0.404248	-2.2038	0.0275385	0.238304
ENSG00000224578-HNRNPA1P48	132.321	0.438734	0.199223	2.20222	0.0276494	0.239063
ENSG00000277957-SENP3-EIF4A1	230.395	-0.376855	0.171176	-2.20156	0.0276964	0.239268
ENSG00000067082-KLF6	58.5831	0.606529	0.275727	2.19974	0.0278254	0.239378
ENSG00000112679-DUSP22	36.4179	0.727339	0.330648	2.19974	0.0278255	0.239378
ENSG00000113282-CLINT1	89.6718	0.51382	0.233533	2.2002	0.0277928	0.239378
ENSG00000184983-NDUFA6	126.427	-0.437786	0.199007	-2.19986	0.0278172	0.239378
ENSG00000215790-SLC35E2A	57.15	0.608908	0.276671	2.20084	0.0277477	0.239378
ENSG00000160818-GPATCH4	166.874	-0.379423	0.172584	-2.19848	0.0279148	0.239946
ENSG00000213465-ARL2	25.4696	-0.869454	0.395567	-2.198	0.0279494	0.240042
ENSG00000121057-AKAP1	81.0482	-0.499415	0.227299	-2.19717	0.0280084	0.240273
ENSG00000170027-YWHAG	105.338	-0.529279	0.240914	-2.19697	0.0280229	0.240273
ENSG00000197061-HIST1H4C	921.992	-0.633649	0.288504	-2.19633	0.0280685	0.240464
ENSG00000150768-DLAT	21.0413	-1.05028	0.478686	-2.19409	0.0282288	0.241034
ENSG00000162433-AK4	47.3587	-0.702866	0.320258	-2.19468	0.0281863	0.241034
ENSG00000172922-RNASEH2C	135.659	-0.478957	0.218227	-2.19476	0.0281806	0.241034
ENSG00000279020-C18orf15	8.62131	1.58484	0.72228	2.19422	0.0282193	0.241034
ENSG00000155959-VBP1	49.7355	-0.677776	0.309019	-2.19332	0.0282846	0.24131
ENSG00000175097-RAG2	20.6122	0.993477	0.453326	2.19153	0.0284135	0.242209
ENSG00000248527-MTATP6P1	4827.61	0.295929	0.135068	2.19096	0.0284543	0.242356
ENSG00000131148-EMC8	43.5247	-0.681505	0.311232	-2.1897	0.0285462	0.242937
ENSG00000012061-ERCC1	69.0081	-0.540089	0.246718	-2.18909	0.02859	0.243109
ENSG00000131143-COX4I1	443.231	-0.30011	0.137131	-2.18849	0.0286339	0.243282
ENSG00000166402-TUB	24.9275	-0.879942	0.402146	-2.18812	0.028661	0.243311
ENSG00000172725-CORO1B	65.9944	0.549781	0.251303	2.18772	0.0286898	0.243355
ENSG00000103550-KNOP1	133.301	-0.416373	0.190381	-2.18705	0.0287389	0.243505
ENSG00000138658-ZGRF1	23.6951	-0.893101	0.408457	-2.18653	0.0287772	0.243505
ENSG00000165119-HNRNPK	807.891	-0.259988	0.118923	-2.18618	0.0288022	0.243505
ENSG00000185436-IFNLR1	13.1616	1.19704	0.54753	2.18626	0.0287964	0.243505
ENSG00000133302-SLF1	39.3059	-0.713196	0.32632	-2.18557	0.0288468	0.243682
ENSG00000100749-VRK1	60.0135	-0.571296	0.261497	-2.18471	0.0289102	0.244017
ENSG00000115524-SF3B1	137.533	0.414301	0.189775	2.18311	0.0290274	0.244418
ENSG00000116459-ATP5PB	209.409	-0.433145	0.198402	-2.18317	0.0290234	0.244418
ENSG00000198162-MAN1A2	151.3	0.417703	0.191335	2.18309	0.0290289	0.244418
ENSG00000125454-SLC25A19	21.6663	-0.939854	0.430582	-2.18275	0.0290543	0.244431
ENSG00000119203-CPSF3	37.1004	-0.724916	0.332292	-2.18156	0.0291418	0.244967
ENSG00000198064-NPIPB13	49.7896	0.64827	0.297224	2.18108	0.0291773	0.245066
ENSG00000070814-TCOF1	134.858	-0.437715	0.200732	-2.18059	0.0292138	0.245172
ENSG00000184489-PTP4A3	89.089	0.490087	0.224846	2.17966	0.029283	0.245552
ENSG00000210191-MT-TL2	22.8775	-0.940769	0.431968	-2.17787	0.0294157	0.246464
ENSG00000115159-GPD2	30.0333	-0.791276	0.363517	-2.17672	0.0295012	0.246578
ENSG00000116001-TIA1	81.6441	0.507555	0.233126	2.17717	0.0294679	0.246578
ENSG00000182979-MTA1	195.608	0.483764	0.222213	2.17702	0.0294788	0.246578
ENSG00000128951-DUT	307.688	-0.346976	0.159551	-2.17471	0.0296521	0.24751
ENSG00000280987-MATR3	273.691	-0.316075	0.145349	-2.17459	0.0296608	0.24751
ENSG00000075711-DLG1	88.6334	0.486714	0.223938	2.17343	0.0297481	0.248005
ENSG00000225972-MTND1P23	5093.71	0.29296	0.134808	2.17316	0.0297683	0.248005
ENSG00000014138-POLA2	30.9834	-0.816198	0.375699	-2.17248	0.0298196	0.248231
ENSG00000126953-TIMM8A	26.6619	-0.85225	0.392458	-2.17157	0.0298882	0.248602
ENSG00000197912-SPG7	156.092	0.441295	0.203268	2.171	0.029931	0.248756
ENSG00000067715-SYT1	126.521	0.424911	0.195979	2.16814	0.0301479	0.249634
ENSG00000102804-TSC22D1	19.315	0.985979	0.454819	2.16785	0.0301702	0.249634
ENSG00000153310-FAM49B	84.1194	-0.498022	0.229681	-2.16832	0.0301342	0.249634
ENSG00000165813-CCDC186	23.974	0.896181	0.413441	2.16762	0.0301878	0.249634
ENSG00000183060-LYSMD4	21.3943	0.953853	0.439794	2.16886	0.0300929	0.249634
ENSG00000204387-C6orf48	155.528	0.396489	0.182935	2.16737	0.0302065	0.249634
ENSG00000277913-RF02105	14.1354	-1.18771	0.547918	-2.16768	0.0301831	0.249634
ENSG00000145354-CISD2	33.749	-0.766026	0.353545	-2.1667	0.0302574	0.249855
ENSG00000015171-ZMYND11	55.6675	0.597113	0.275638	2.16629	0.0302889	0.249914
ENSG00000171634-BPTF	534.11	0.262728	0.121325	2.1655	0.0303498	0.250215
ENSG00000088986-DYNLL1	451.279	0.333955	0.154267	2.16479	0.0304041	0.250463
ENSG00000120925-RNF170	11.7446	1.27717	0.590199	2.16397	0.030467	0.25078
ENSG00000119720-NRDE2	118.842	-0.471906	0.218123	-2.16349	0.0305036	0.250881
ENSG00000033327-GAB2	18.2555	1.0162	0.470338	2.16057	0.0307284	0.252318
ENSG00000166226-CCT2	231.332	-0.394165	0.182461	-2.16027	0.0307519	0.252318
ENSG00000181104-F2R	20.4657	0.96859	0.448327	2.16045	0.0307375	0.252318
ENSG00000179119-SPTY2D1	16.3862	-1.07411	0.497549	-2.15881	0.030865	0.252927
ENSG00000285396-AC012476.1	13.9512	-1.14069	0.528422	-2.15868	0.0308753	0.252927
ENSG00000006744-ELAC2	56.7664	-0.588955	0.272992	-2.15741	0.0309738	0.252998
ENSG00000085832-EPS15	29.6338	0.793751	0.367902	2.15751	0.0309662	0.252998
ENSG00000090924-PLEKHG2	23.4312	0.926161	0.429466	2.15654	0.0310412	0.252998
ENSG00000109685-NSD2	101.049	-0.462237	0.214454	-2.15541	0.0311299	0.252998
ENSG00000121064-SCPEP1	22.8026	0.887594	0.41159	2.1565	0.0310446	0.252998
ENSG00000140941-MAP1LC3B	44.0702	0.652154	0.302483	2.156	0.0310834	0.252998
ENSG00000169627-BOLA2B	67.5415	-0.582513	0.270224	-2.15567	0.0311096	0.252998
ENSG00000213246-SUPT4H1	92.6684	-0.467935	0.216949	-2.15689	0.0310141	0.252998
ENSG00000261654-AL360270.2	15.3762	1.11065	0.514676	2.15796	0.0309306	0.252998
ENSG00000268400-AC008763.2	83.6642	-0.493919	0.229084	-2.15606	0.0310789	0.252998
ENSG00000168904-LRRC28	10.0087	1.35765	0.630138	2.15453	0.0311987	0.253357
ENSG00000085840-ORC1	10.0284	-1.42144	0.659984	-2.15374	0.0312602	0.253496
ENSG00000159593-NAE1	100.03	-0.457116	0.212249	-2.15368	0.031265	0.253496
ENSG00000172534-HCFC1	157.836	-0.408203	0.189584	-2.15315	0.0313071	0.253637
ENSG00000119707-RBM25	542.394	0.288549	0.134177	2.15051	0.0315152	0.254909
ENSG00000151694-ADAM17	73.2888	0.572423	0.266217	2.15021	0.0315385	0.254909
ENSG00000183048-SLC25A10	11.2208	-1.30867	0.608524	-2.15057	0.0315105	0.254909
ENSG00000101220-C20orf27	37.1167	-0.716149	0.333175	-2.14947	0.0315971	0.254983
ENSG00000182628-SKA2	62.1974	-0.568143	0.264312	-2.14952	0.0315935	0.254983
ENSG00000112640-PPP2R5D	92.4788	-0.508762	0.236813	-2.14837	0.031684	0.255074
ENSG00000146701-MDH2	154.265	-0.39628	0.184506	-2.14779	0.0317304	0.255074
ENSG00000158234-FAIM	27.55	-0.841694	0.391893	-2.14777	0.0317324	0.255074
ENSG00000184752-NDUFA12	30.6783	-0.78353	0.364803	-2.14782	0.0317282	0.255074
ENSG00000265185-SNORD3B-1	35.4191	0.949667	0.442061	2.14827	0.031692	0.255074
ENSG00000125534-PPDPF	177.769	-0.374612	0.174503	-2.14673	0.0318147	0.255137
ENSG00000141873-SLC39A3	10.9128	-1.30094	0.605961	-2.14691	0.0318004	0.255137
ENSG00000169139-UBE2V2	71.4802	-0.548605	0.255517	-2.14704	0.0317904	0.255137
ENSG00000125375-DMAC2L	37.7427	0.7136	0.332574	2.14569	0.0318979	0.255605
ENSG00000061938-TNK2	32.6573	0.734695	0.342594	2.1445	0.0319925	0.255696
ENSG00000110321-EIF4G2	599.69	-0.306794	0.143059	-2.14454	0.0319899	0.255696
ENSG00000166164-BRD7	153.335	-0.388676	0.181192	-2.1451	0.0319447	0.255696
ENSG00000171130-ATP6V0E2	12.6293	1.25819	0.586918	2.14373	0.0320547	0.255696
ENSG00000185641-AC034236.1	277.529	0.367697	0.171511	2.14387	0.0320435	0.255696
ENSG00000198718-TOGARAM1	13.5048	1.15702	0.539737	2.14368	0.0320583	0.255696
ENSG00000101856-PGRMC1	13.2501	-1.16664	0.544338	-2.14322	0.0320955	0.255794
ENSG00000155846-PPARGC1B	25.2022	-0.864685	0.403729	-2.14174	0.032214	0.25643
ENSG00000185920-PTCH1	8.81642	1.42889	0.667203	2.14161	0.0322251	0.25643
ENSG00000168615-ADAM9	8.97935	1.50624	0.703506	2.14105	0.0322702	0.256591
ENSG00000131876-SNRPA1	75.5682	-0.51476	0.240465	-2.14068	0.0322995	0.256625
ENSG00000158417-EIF5B	458.429	-0.271222	0.126796	-2.13904	0.0324321	0.257083
ENSG00000165501-LRR1	50.2726	-0.645548	0.301769	-2.13921	0.0324184	0.257083
ENSG00000284966-AL138689.2	55.25	0.604768	0.282728	2.13904	0.0324321	0.257083
ENSG00000260565-ERVK13-1	10.353	1.34511	0.629503	2.13678	0.0326157	0.258339
ENSG00000204514-ZNF814	63.2999	0.584893	0.273942	2.1351	0.032753	0.259228
ENSG00000083312-TNPO1	117.248	-0.43864	0.205516	-2.13433	0.0328157	0.259518
ENSG00000100412-ACO2	95.5423	-0.498273	0.233489	-2.13403	0.0328402	0.259518
ENSG00000269404-SPIB	21.8844	-0.949539	0.445166	-2.133	0.0329248	0.259987
ENSG00000122484-RPAP2	68.6604	0.577325	0.27087	2.13137	0.0330586	0.260843
ENSG00000234222-LIX1L-AS1	76.1121	-0.521776	0.244982	-2.12985	0.0331837	0.26163
ENSG00000160752-FDPS	89.2053	-0.486269	0.228347	-2.12952	0.0332115	0.261649
ENSG00000132507-EIF5A	130.058	-0.439913	0.206731	-2.12795	0.0333413	0.26247
ENSG00000070614-NDST1	26.0875	-0.838659	0.394391	-2.12646	0.0334646	0.263038
ENSG00000138468-SENP7	37.9642	0.70715	0.332515	2.12667	0.0334474	0.263038
ENSG00000114867-EIF4G1	194.068	-0.352827	0.166023	-2.12517	0.0335727	0.263513
ENSG00000132716-DCAF8	72.0823	0.528771	0.248819	2.12512	0.0335762	0.263513
ENSG00000213860-RPL21P75	221.04	0.358945	0.168945	2.12463	0.0336177	0.263638
ENSG00000213865-C8orf44	12.523	1.20203	0.565908	2.12407	0.0336647	0.263805
ENSG00000132002-DNAJB1	34.7461	-0.716038	0.337186	-2.12357	0.033706	0.263927
ENSG00000120798-NR2C1	22.5962	0.897717	0.422986	2.12233	0.0338099	0.26454
ENSG00000257270-AL928654.2	159.819	0.499382	0.23556	2.11998	0.0340079	0.265887
ENSG00000186193-SAPCD2	74.583	-0.514315	0.242655	-2.11953	0.0340459	0.265982
ENSG00000230606-AC092683.1	91.1811	0.475912	0.224583	2.11909	0.0340825	0.266066
ENSG00000172086-KRCC1	31.9592	0.747928	0.353021	2.11865	0.03412	0.266156
ENSG00000116750-UCHL5	93.3593	-0.466742	0.220558	-2.11619	0.0343287	0.267582
ENSG00000280953-LINC01163	11.9602	1.28161	0.606059	2.11467	0.0344584	0.268389
ENSG00000173113-TRMT112	283.098	-0.35015	0.165609	-2.11431	0.0344885	0.268421
ENSG00000177084-POLE	46.2035	-0.61703	0.291905	-2.1138	0.0345321	0.268557
ENSG00000110074-FOXRED1	15.6046	-1.05698	0.50015	-2.11332	0.0345736	0.268676
ENSG00000151092-NGLY1	58.5174	0.554702	0.262609	2.11228	0.0346628	0.269167
ENSG00000103187-COTL1	30.4989	-0.75039	0.355549	-2.11051	0.0348146	0.269667
ENSG00000134779-TPGS2	52.9649	-0.61849	0.293081	-2.11031	0.034832	0.269667
ENSG00000140990-NDUFB10	109.83	-0.44383	0.210312	-2.11034	0.0348287	0.269667
ENSG00000174243-DDX23	28.6998	-0.815938	0.38664	-2.11033	0.0348302	0.269667
ENSG00000164535-DAGLB	30.4984	0.784708	0.371924	2.10986	0.0348702	0.269667
ENSG00000196584-XRCC2	40.2354	-0.681106	0.322846	-2.1097	0.0348846	0.269667
ENSG00000240489-SETP14	13.0079	-1.20671	0.572181	-2.10896	0.0349483	0.269835
ENSG00000285600-AC023593.1	96.5748	-0.540293	0.256204	-2.10884	0.0349587	0.269835
ENSG00000164182-NDUFAF2	48.862	-0.623789	0.295919	-2.10797	0.0350333	0.270208
ENSG00000171793-CTPS1	127.403	-0.470179	0.223252	-2.10604	0.0352007	0.271296
ENSG00000015479-MATR3	275.983	-0.305533	0.145372	-2.10173	0.0355772	0.273248
ENSG00000051341-POLQ	30.0186	-0.804579	0.382973	-2.10088	0.0356519	0.273248
ENSG00000101150-TPD52L2	59.0027	0.557113	0.265132	2.10127	0.0356176	0.273248
ENSG00000107077-KDM4C	10.1288	1.38662	0.659987	2.10097	0.0356432	0.273248
ENSG00000157741-UBN2	65.3186	0.552986	0.263325	2.10001	0.0357279	0.273248
ENSG00000163510-CWC22	38.2513	0.6946	0.330793	2.0998	0.0357461	0.273248
ENSG00000175482-POLD4	9.71649	1.35589	0.6452	2.1015	0.035597	0.273248
ENSG00000225855-RUSC1-AS1	89.3093	-0.489524	0.232959	-2.10133	0.0356118	0.273248
ENSG00000242088-AC090602.1	18.8969	1.00055	0.476386	2.10029	0.0357029	0.273248
ENSG00000256514-AP003419.1	9.71649	1.35589	0.6452	2.1015	0.035597	0.273248
ENSG00000258449-AC023510.1	59.3707	0.635681	0.302618	2.1006	0.0356759	0.273248
ENSG00000146278-PNRC1	15.1571	1.14526	0.545736	2.09856	0.0358558	0.273883
ENSG00000267383-AC011447.3	73.6063	-0.504819	0.24066	-2.09764	0.0359369	0.274299
ENSG00000176894-PXMP2	29.7009	-0.757242	0.361407	-2.09526	0.0361479	0.275705
ENSG00000077420-APBB1IP	154.047	-0.421223	0.201185	-2.09371	0.0362856	0.27655
ENSG00000051180-RAD51	14.9676	-1.06327	0.508132	-2.09251	0.0363932	0.276761
ENSG00000086232-EIF2AK1	165.313	-0.373444	0.178468	-2.0925	0.036394	0.276761
ENSG00000205609-EIF3CL	144.91	-0.407611	0.194756	-2.09293	0.036355	0.276761
ENSG00000086475-SEPHS1	52.0575	-0.596851	0.285285	-2.09212	0.0364275	0.276812
ENSG00000182022-CHST15	54.7363	0.592493	0.283325	2.09121	0.036509	0.277022
ENSG00000213967-ZNF726	14.1873	-1.12011	0.535574	-2.09143	0.0364898	0.277022
ENSG00000109536-FRG1	69.2571	-0.541602	0.259068	-2.09058	0.036566	0.27725
ENSG00000031698-SARS	87.4792	-0.477771	0.228757	-2.08855	0.0367484	0.277897
ENSG00000047315-POLR2B	113.519	0.459197	0.219863	2.08856	0.0367469	0.277897
ENSG00000102898-NUTF2	225.37	-0.325202	0.155738	-2.08814	0.0367854	0.277897
ENSG00000130706-ADRM1	59.7826	-0.584254	0.279795	-2.08815	0.0367846	0.277897
ENSG00000173511-VEGFB	42.7604	-0.639116	0.306072	-2.08813	0.0367865	0.277897
ENSG00000280119-AC093642.2	14.2711	1.20131	0.575475	2.08751	0.0368423	0.278115
ENSG00000184840-TMED9	146.929	-0.380034	0.182259	-2.08513	0.0370575	0.279534
ENSG00000153944-MSI2	255.674	0.361163	0.173253	2.0846	0.0371057	0.279693
ENSG00000130638-ATXN10	64.7843	-0.526502	0.252663	-2.08381	0.0371777	0.28003
ENSG00000105926-MPP6	120.176	0.437049	0.209769	2.08348	0.0372077	0.280051
ENSG00000073111-MCM2	96.4641	-0.537834	0.258366	-2.08168	0.0373718	0.280211
ENSG00000112245-PTP4A1	72.4777	-0.525526	0.252446	-2.08174	0.0373665	0.280211
ENSG00000128973-CLN6	31.3297	-0.772776	0.371267	-2.08145	0.0373923	0.280211
ENSG00000140263-SORD	46.8309	-0.625393	0.300286	-2.08266	0.0372824	0.280211
ENSG00000197381-ADARB1	23.4215	-0.844327	0.405632	-2.08151	0.0373873	0.280211
ENSG00000258644-SYNJ2BP-COX16	79.0395	-0.513975	0.246823	-2.08236	0.0373094	0.280211
ENSG00000060339-CCAR1	379.182	0.275109	0.132224	2.08062	0.0374685	0.280578
ENSG00000021762-OSBPL5	15.3693	1.05119	0.50545	2.07972	0.0375512	0.280891
ENSG00000100815-TRIP11	67.1981	0.57488	0.276592	2.07844	0.0376685	0.280891
ENSG00000114209-PDCD10	47.7248	-0.644023	0.309755	-2.07914	0.0376046	0.280891
ENSG00000136807-CDK9	11.311	1.21157	0.582896	2.07853	0.0376606	0.280891
ENSG00000141622-RNF165	64.9342	-0.522167	0.251309	-2.07779	0.0377288	0.280891
ENSG00000161981-SNRNP25	40.2862	-0.657325	0.316119	-2.07936	0.0375842	0.280891
ENSG00000213625-LEPROT	19.0079	0.957836	0.460937	2.07802	0.0377074	0.280891
ENSG00000279433-AC018529.3	14.3348	1.1157	0.536913	2.07798	0.0377112	0.280891
ENSG00000068796-KIF2A	86.5596	-0.47599	0.229451	-2.07448	0.0380352	0.28227
ENSG00000070950-RAD18	24.171	-0.867792	0.418118	-2.07547	0.0379426	0.28227
ENSG00000125912-NCLN	53.6761	-0.620464	0.299162	-2.07401	0.0380785	0.28227
ENSG00000126787-DLGAP5	32.6441	-0.734092	0.353916	-2.0742	0.038061	0.28227
ENSG00000163964-PIGX	27.1235	-0.779374	0.375645	-2.07476	0.0380086	0.28227
ENSG00000264558-AC015674.1	139.085	-0.406528	0.195929	-2.07487	0.0379982	0.28227
ENSG00000239323-AL163973.1	19.0398	0.973762	0.469779	2.07281	0.0381903	0.282894
ENSG00000169689-CENPX	57.0153	-0.598476	0.288919	-2.07143	0.0383186	0.28364
ENSG00000139734-DIAPH3	49.6197	-0.655864	0.31677	-2.07047	0.0384079	0.284097
ENSG00000101608-MYL12A	141.58	0.419709	0.202893	2.06862	0.0385817	0.285178
ENSG00000183023-SLC8A1	20.3859	-0.970522	0.469896	-2.0654	0.0388854	0.287216
ENSG00000160767-FAM189B	26.8397	-0.788691	0.382007	-2.0646	0.038961	0.287568
ENSG00000175279-CENPS	45.3804	-0.666794	0.323145	-2.06345	0.03907	0.288166
ENSG00000148835-TAF5	34.5777	-0.753851	0.365432	-2.0629	0.0391217	0.28834
ENSG00000125450-NUP85	74.6065	-0.512676	0.24856	-2.06258	0.0391523	0.288359
ENSG00000285897-AC004687.2	90.7491	-0.450988	0.218729	-2.06186	0.0392212	0.28866
ENSG00000166925-TSC22D4	57.6966	0.551481	0.267513	2.06151	0.0392542	0.288697
ENSG00000112208-BAG2	28.8107	-0.791116	0.383841	-2.06105	0.0392982	0.288814
ENSG00000142168-SOD1	234.055	-0.34696	0.168367	-2.06073	0.0393285	0.28883
ENSG00000177646-ACAD9	16.4653	-1.00462	0.487655	-2.0601	0.0393889	0.288876
ENSG00000189144-ZNF573	11.9044	1.21634	0.590434	2.06008	0.0393909	0.288876
ENSG00000055609-KMT2C	147.057	0.388136	0.188608	2.0579	0.0396002	0.289703
ENSG00000116852-KIF21B	16.5024	-0.995691	0.484006	-2.05719	0.0396683	0.289703
ENSG00000132773-TOE1	31.0904	-0.737097	0.358343	-2.05696	0.0396902	0.289703
ENSG00000140406-TLNRD1	34.0581	-0.750622	0.364938	-2.05685	0.0397007	0.289703
ENSG00000167977-KCTD5	18.314	0.979172	0.475802	2.05794	0.039596	0.289703
ENSG00000169299-PGM2	26.4765	0.796985	0.38716	2.05854	0.039538	0.289703
ENSG00000235174-RPL39P3	118.05	0.468928	0.227966	2.05701	0.0396849	0.289703
ENSG00000240509-RPL34P18	236.558	0.392119	0.190673	2.0565	0.0397341	0.289741
ENSG00000285565-AL671762.1	153.826	0.38268	0.186143	2.05584	0.0397977	0.289999
ENSG00000152253-SPC25	19.6826	-0.934504	0.454648	-2.05545	0.0398359	0.290072
ENSG00000168894-RNF181	52.6388	-0.609187	0.296441	-2.055	0.0398786	0.290177
ENSG00000084676-NCOA1	31.9775	0.751136	0.365851	2.05312	0.0400612	0.290261
ENSG00000125304-TM9SF2	31.7782	0.91692	0.446385	2.0541	0.039966	0.290261
ENSG00000137054-POLR1E	17.3259	-1.00159	0.487814	-2.05322	0.0400512	0.290261
ENSG00000178952-TUFM	135.65	-0.384912	0.187413	-2.05382	0.0399935	0.290261
ENSG00000185825-BCAP31	60.4352	-0.546385	0.266097	-2.05333	0.0400407	0.290261
ENSG00000213190-MLLT11	74.4631	-0.528533	0.257456	-2.05291	0.0400815	0.290261
ENSG00000270629-NBPF14	18.9671	0.920502	0.448403	2.05285	0.0400875	0.290261
ENSG00000142945-KIF2C	39.8016	-0.651505	0.317493	-2.05203	0.0401667	0.29063
ENSG00000198561-CTNND1	34.1175	0.713806	0.347916	2.05166	0.0402026	0.290685
ENSG00000224383-PRR29	29.6968	-0.789452	0.385011	-2.05047	0.040319	0.291322
ENSG00000227311-AL031985.2	28.4792	0.784172	0.382933	2.04781	0.040579	0.292995
ENSG00000167397-VKORC1	36.182	-0.689553	0.336782	-2.04748	0.0406113	0.293022
ENSG00000109919-MTCH2	148.132	-0.373156	0.182336	-2.04653	0.0407045	0.293489
ENSG00000091483-FH	77.1197	-0.54324	0.265581	-2.04548	0.0408074	0.294025
ENSG00000184897-H1FX	198.65	-0.35138	0.171852	-2.04466	0.0408884	0.294402
ENSG00000109736-MFSD10	12.3465	1.16517	0.570146	2.04363	0.0409903	0.29493
ENSG00000127603-MACF1	378.623	0.276713	0.135429	2.04324	0.0410291	0.295002
ENSG00000115457-IGFBP2	61.5316	-0.556628	0.27247	-2.04289	0.0410629	0.295039
ENSG00000178971-CTC1	20.1979	0.925222	0.453096	2.042	0.0411517	0.295471
ENSG00000225131-PSME2P2	13.7364	-1.13016	0.553545	-2.04167	0.0411838	0.295495
ENSG00000008083-JARID2	213.345	0.341729	0.167431	2.04101	0.0412497	0.295762
ENSG00000010256-UQCRC1	72.491	-0.525014	0.257366	-2.03995	0.041355	0.295793
ENSG00000100242-SUN2	73.9014	0.505692	0.247933	2.03963	0.0413872	0.295793
ENSG00000130520-LSM4	110.285	-0.457366	0.224135	-2.04058	0.0412923	0.295793
ENSG00000151948-GLT1D1	22.5884	-0.873839	0.428452	-2.03952	0.0413978	0.295793
ENSG00000271741-AC114490.2	17.0317	1.04563	0.512639	2.03971	0.0413796	0.295793
ENSG00000145332-KLHL8	72.0491	-0.489268	0.240057	-2.03813	0.041537	0.296376
ENSG00000168056-LTBP3	19.1298	0.955726	0.468888	2.03828	0.0415216	0.296376
ENSG00000145012-LPP	41.6751	0.631893	0.31022	2.03692	0.0416582	0.297034
ENSG00000160352-ZNF714	37.1001	-0.680829	0.334432	-2.03578	0.0417729	0.297647
ENSG00000166963-MAP1A	28.0785	0.760884	0.373836	2.03534	0.0418167	0.297753
ENSG00000120008-WDR11	25.3363	0.844189	0.415385	2.0323	0.0421228	0.299705
ENSG00000136527-TRA2B	284.976	-0.294413	0.144885	-2.03204	0.0421492	0.299705
ENSG00000092445-TYRO3	10.1716	-1.31432	0.646921	-2.03165	0.0421893	0.299783
ENSG00000146243-IRAK1BP1	13.54	1.15902	0.570597	2.03125	0.0422297	0.299863
ENSG00000187796-CARD9	30.8543	-0.774988	0.381632	-2.03072	0.0422833	0.300036
ENSG00000176058-TPRN	25.4025	-0.815261	0.401578	-2.03015	0.0423418	0.300244
ENSG00000123562-MORF4L2	147.735	-0.381246	0.187856	-2.02946	0.0424119	0.300379
ENSG00000256167-ATF4P4	21.5922	-0.857533	0.422558	-2.02938	0.0424192	0.300379
ENSG00000101868-POLA1	55.4932	-0.56622	0.279113	-2.02864	0.0424949	0.300502
ENSG00000156738-MS4A1	20.8321	0.938605	0.462651	2.02876	0.0424832	0.300502
ENSG00000126351-THRA	37.9877	0.736832	0.363274	2.02831	0.0425289	0.300536
ENSG00000253729-PRKDC	168.231	-0.389209	0.192073	-2.02636	0.0427275	0.301732
ENSG00000186591-UBE2H	21.3871	0.856594	0.422853	2.02575	0.0427906	0.301763
ENSG00000280778-AC243547.3	56.5692	-0.544155	0.268592	-2.02595	0.0427695	0.301763
ENSG00000092820-EZR	95.9827	0.454502	0.224414	2.02528	0.0428386	0.301895
ENSG00000131473-ACLY	91.478	-0.457128	0.22588	-2.02376	0.0429944	0.302371
ENSG00000139641-ESYT1	57.4402	-0.541197	0.267377	-2.0241	0.0429604	0.302371
ENSG00000197498-RPF2	47.9619	-0.588091	0.290554	-2.02403	0.0429667	0.302371
ENSG00000198554-WDHD1	27.1433	-0.766028	0.37863	-2.02316	0.0430567	0.302603
ENSG00000184992-BRI3BP	52.9315	-0.556112	0.275134	-2.02124	0.0432551	0.303789
ENSG00000143256-PFDN2	84.6651	-0.502381	0.248668	-2.02028	0.0433539	0.304116
ENSG00000165775-FUNDC2	48.1538	-0.61808	0.30599	-2.01993	0.0433902	0.304116
ENSG00000232807-AL137186.2	26.4792	0.811062	0.401496	2.0201	0.0433727	0.304116
ENSG00000188690-UROS	10.0665	-1.26847	0.628339	-2.01876	0.043512	0.304762
ENSG00000013306-SLC25A39	75.6587	-0.519383	0.257389	-2.01789	0.0436028	0.305111
ENSG00000183258-DDX41	41.9503	-0.64508	0.319708	-2.01771	0.0436212	0.305111
ENSG00000183336-BOLA2	71.218	-0.516025	0.255929	-2.01629	0.0437702	0.305737
ENSG00000280128-AL662795.2	27.387	0.786182	0.389901	2.01636	0.0437621	0.305737
ENSG00000118257-NRP2	39.7473	-0.634238	0.314855	-2.01438	0.0439698	0.306923
ENSG00000155366-RHOC	9.1731	1.3611	0.676264	2.01267	0.0441489	0.307965
ENSG00000221914-PPP2R2A	105.697	-0.432337	0.214907	-2.01174	0.0442476	0.308444
ENSG00000102030-NAA10	59.5449	-0.528638	0.262922	-2.01062	0.0443651	0.308845
ENSG00000245970-AP003352.1	2741.65	0.307565	0.152964	2.01071	0.0443561	0.308845
ENSG00000100109-TFIP11	96.0472	0.426266	0.212079	2.00994	0.0444372	0.309138
ENSG00000135451-TROAP	33.7105	-0.685141	0.340963	-2.00943	0.0444917	0.309308
ENSG00000012817-KDM5D	18.3903	0.925348	0.460758	2.00832	0.0446097	0.309722
ENSG00000093009-CDC45	26.66	-0.7882	0.392471	-2.0083	0.0446115	0.309722
ENSG00000113719-ERGIC1	500.498	0.2979	0.148382	2.00765	0.0446805	0.309829
ENSG00000213402-PTPRCAP	58.8176	0.527774	0.26289	2.00759	0.0446871	0.309829
ENSG00000007968-E2F2	43.5356	-0.68327	0.340495	-2.0067	0.0447819	0.310093
ENSG00000103253-HAGHL	24.4171	0.802535	0.400048	2.0061	0.0448459	0.310093
ENSG00000168394-TAP1	36.6319	0.656236	0.327045	2.00656	0.0447963	0.310093
ENSG00000231409-AC018868.1	103.495	0.434544	0.216587	2.00632	0.044822	0.310093
ENSG00000087086-FTL	175.323	-0.401381	0.200156	-2.00535	0.044926	0.310439
ENSG00000138771-SHROOM3	39.9479	0.701002	0.349616	2.00506	0.0449565	0.310441
ENSG00000132359-RAP1GAP2	59.9796	0.540993	0.269957	2.00399	0.0450706	0.310871
ENSG00000182919-C11orf54	23.8849	0.868521	0.433473	2.00363	0.0451094	0.310871
ENSG00000198258-UBL5	295.101	-0.319795	0.1596	-2.00373	0.0450988	0.310871
ENSG00000161888-SPC24	22.1522	-0.854416	0.42659	-2.0029	0.045188	0.311204
ENSG00000106244-PDAP1	111.249	-0.401672	0.200617	-2.00219	0.0452646	0.311315
ENSG00000149474-KAT14	15.1848	-1.00351	0.501135	-2.00247	0.0452345	0.311315
ENSG00000097021-ACOT7	47.032	-0.616384	0.307991	-2.0013	0.0453597	0.311345
ENSG00000184857-TMEM186	9.97404	-1.27846	0.638758	-2.00147	0.0453417	0.311345
ENSG00000259544-AC021739.4	10.6524	1.21413	0.606543	2.00172	0.045315	0.311345
ENSG00000113356-POLR3G	18.8008	-0.926737	0.463436	-1.99971	0.0455316	0.312317
ENSG00000162086-ZNF75A	12.4494	1.10901	0.554766	1.99905	0.0456025	0.312595
ENSG00000112972-HMGCS1	76.2693	-0.480674	0.24055	-1.99823	0.0456918	0.31279
ENSG00000284776-AL121900.2	9.75708	1.45478	0.727992	1.99834	0.0456794	0.31279
ENSG00000175826-CTDNEP1	163.749	-0.362953	0.18176	-1.99687	0.0458388	0.313588
ENSG00000196365-LONP1	52.5335	-0.568663	0.284926	-1.99582	0.045953	0.313951
ENSG00000275700-AATF	49.2104	-0.576982	0.289081	-1.99592	0.0459429	0.313951
ENSG00000136379-ABHD17C	23.6777	-0.811426	0.406755	-1.99488	0.0460563	0.314239
ENSG00000277443-MARCKS	59.527	-0.555307	0.278342	-1.99505	0.0460372	0.314239
ENSG00000100216-TOMM22	135.697	-0.417953	0.2096	-1.99404	0.0461472	0.314443
ENSG00000217128-FNIP1	28.0904	0.783088	0.392686	1.99418	0.0461318	0.314443
ENSG00000042088-TDP1	22.3744	-0.852183	0.427622	-1.99284	0.0462786	0.314509
ENSG00000111196-MAGOHB	38.2442	-0.6716	0.337054	-1.99256	0.0463097	0.314509
ENSG00000131791-PRKAB2	12.315	1.13367	0.568914	1.99269	0.0462951	0.314509
ENSG00000132436-FIGNL1	31.5348	-0.7142	0.358322	-1.99318	0.0462419	0.314509
ENSG00000198055-GRK6	44.182	-0.613516	0.307811	-1.99316	0.0462444	0.314509
ENSG00000133983-COX16	82.4876	-0.474451	0.238249	-1.99141	0.0464357	0.315157
ENSG00000135940-COX5B	186.613	-0.337728	0.169626	-1.99102	0.0464788	0.31524
ENSG00000253204-AC090281.1	20.1503	-0.866817	0.435424	-1.99074	0.0465093	0.31524
ENSG00000136436-CALCOCO2	48.2653	0.606685	0.304925	1.98962	0.0466326	0.315867
ENSG00000189057-FAM111B	85.3701	-0.473779	0.238221	-1.98883	0.0467204	0.316254
ENSG00000079819-EPB41L2	164.941	-0.344238	0.173169	-1.98787	0.046826	0.316552
ENSG00000100142-POLR2F	109.684	-0.422819	0.212686	-1.988	0.046812	0.316552
ENSG00000108622-ICAM2	29.1326	-0.767811	0.386683	-1.98563	0.0470739	0.317517
ENSG00000110536-PTPMT1	54.563	-0.596103	0.300202	-1.98567	0.0470696	0.317517
ENSG00000135968-GCC2	69.2021	0.491766	0.247629	1.9859	0.0470446	0.317517
ENSG00000159140-SON	561.071	0.237979	0.11986	1.98547	0.0470922	0.317517
ENSG00000168092-PAFAH1B2	79.3084	-0.50821	0.256086	-1.98453	0.0471973	0.318017
ENSG00000133059-DSTYK	16.4538	0.986283	0.497471	1.9826	0.0474126	0.318194
ENSG00000134330-IAH1	68.2126	0.544094	0.274322	1.98341	0.0473216	0.318194
ENSG00000138160-KIF11	41.5278	-0.608761	0.30706	-1.98255	0.0474182	0.318194
ENSG00000149806-FAU	1358.89	-0.245094	0.123655	-1.98208	0.0474708	0.318194
ENSG00000167840-ZNF232	32.9282	-0.677286	0.341703	-1.98209	0.0474693	0.318194
ENSG00000185658-BRWD1	98.981	0.415595	0.20966	1.98223	0.047453	0.318194
ENSG00000187713-TMEM203	19.4022	-0.890371	0.448881	-1.98353	0.0473078	0.318194
ENSG00000253626-EIF5AL1	61.3304	-0.535608	0.269992	-1.98379	0.0472788	0.318194
ENSG00000125246-CLYBL	18.0494	0.963007	0.486188	1.98073	0.0476215	0.318788
ENSG00000130311-DDA1	58.4601	-0.528549	0.266832	-1.98083	0.0476103	0.318788
ENSG00000150316-CWC15	119.263	-0.428892	0.216602	-1.9801	0.0476926	0.319057
ENSG00000205572-SERF1B	9.91596	-1.27001	0.641492	-1.97977	0.0477291	0.319093
ENSG00000071082-RPL31	1958.13	0.233699	0.118187	1.97737	0.0479995	0.320182
ENSG00000180879-SSR4	112.914	-0.399716	0.202134	-1.97748	0.0479879	0.320182
ENSG00000198888-MT-ND1	10160	0.251484	0.127154	1.97778	0.047953	0.320182
ENSG00000206053-JPT2	63.8059	-0.500296	0.25303	-1.97722	0.0480164	0.320182
ENSG00000272162-AL024498.2	21.2669	0.844073	0.426998	1.97676	0.048069	0.320325
ENSG00000137106-GRHPR	39.6148	-0.648998	0.328452	-1.97593	0.0481628	0.320535
ENSG00000164040-PGRMC2	44.9936	-0.599299	0.303296	-1.97595	0.0481602	0.320535
ENSG00000100813-ACIN1	115.352	0.424934	0.215144	1.97511	0.0482554	0.320888
ENSG00000116221-MRPL37	76.6541	-0.488538	0.247372	-1.97491	0.0482782	0.320888
ENSG00000166595-CIAO2B	90.8076	-0.436586	0.22112	-1.97443	0.0483325	0.321041
ENSG00000073060-SCARB1	42.474	-0.627822	0.318073	-1.97383	0.0484007	0.321287
ENSG00000184216-IRAK1	86.7176	-0.502434	0.254609	-1.97336	0.0484549	0.32144
ENSG00000004478-FKBP4	17.639	-0.951429	0.482744	-1.97088	0.0487381	0.32311
ENSG00000177981-ASB8	15.5214	0.979958	0.497324	1.97046	0.0487855	0.323216
ENSG00000135930-EIF4E2	97.8281	-0.418409	0.212456	-1.96939	0.0489088	0.323824
ENSG00000110057-UNC93B1	37.222	0.664514	0.337695	1.9678	0.0490916	0.324825
ENSG00000099977-DDT	151.428	-0.363092	0.184596	-1.96696	0.0491884	0.325256
ENSG00000087495-PHACTR3	156.219	0.352748	0.179416	1.96608	0.0492889	0.325712
ENSG00000243749-TMEM35B	16.4571	1.02258	0.520228	1.96564	0.0493399	0.32584
ENSG00000261312-AC002550.1	51.4643	-0.56155	0.28582	-1.9647	0.0494493	0.326353
ENSG00000128524-ATP6V1F	54.5062	-0.528985	0.269694	-1.96143	0.0498291	0.328649
ENSG00000054267-ARID4B	351.465	0.268533	0.136955	1.96074	0.0499089	0.328964
ENSG00000078140-UBE2K	119.371	-0.384179	0.195977	-1.96033	0.0499572	0.329041
ENSG00000150459-SAP18	101.347	-0.434544	0.221743	-1.95968	0.0500335	0.329041
ENSG00000154920-EME1	47.9121	-0.596621	0.304505	-1.95931	0.050076	0.329041
ENSG00000184967-NOC4L	8.96161	-1.28787	0.657319	-1.95928	0.0500805	0.329041
ENSG00000261740-BOLA2-SMG1P6	73.7495	-0.486067	0.247984	-1.96007	0.0499871	0.329041
ENSG00000128050-PAICS	166.028	-0.389649	0.19902	-1.95784	0.0502489	0.329937
ENSG00000150907-FOXO1	30.5087	-0.706806	0.361311	-1.95622	0.0504387	0.330972
ENSG00000139350-NEDD1	33.6186	-0.676694	0.346017	-1.95567	0.0505045	0.331192
ENSG00000089737-DDX24	169.4	-0.331408	0.169566	-1.95445	0.0506482	0.331452
ENSG00000107185-RGP1	25.9572	0.789928	0.404213	1.95424	0.050673	0.331452
ENSG00000135912-TTLL4	18.4009	-0.948999	0.485499	-1.95469	0.0506199	0.331452
ENSG00000139990-DCAF5	38.2174	0.634386	0.324526	1.95481	0.0506058	0.331452
ENSG00000114374-USP9Y	16.0948	1.04501	0.535022	1.95321	0.0507952	0.33183
ENSG00000206337-HCP5	36.3531	0.660942	0.338347	1.95344	0.0507671	0.33183
ENSG00000126698-DNAJC8	158.172	-0.34168	0.175028	-1.95214	0.0509216	0.33192
ENSG00000171497-PPID	30.3288	-0.718827	0.368251	-1.952	0.050938	0.33192
ENSG00000174977-AC026271.1	12.3434	-1.11899	0.573051	-1.95269	0.0508566	0.33192
ENSG00000196199-MPHOSPH8	128.58	0.369321	0.18918	1.95222	0.050912	0.33192
ENSG00000134057-CCNB1	30.3875	-0.725498	0.37178	-1.95142	0.0510075	0.332162
ENSG00000079459-FDFT1	112.973	-0.461082	0.236352	-1.95083	0.0510769	0.332336
ENSG00000080986-NDC80	39.9705	-0.633843	0.325326	-1.94833	0.0513752	0.332336
ENSG00000105373-NOP53	230.285	0.313651	0.160979	1.9484	0.0513676	0.332336
ENSG00000128944-KNSTRN	35.7624	-0.669499	0.343648	-1.94821	0.0513895	0.332336
ENSG00000171503-ETFDH	13.7828	-1.02035	0.523555	-1.94889	0.0513085	0.332336
ENSG00000183808-RBM12B	58.1711	0.525854	0.269678	1.94994	0.0511837	0.332336
ENSG00000189339-SLC35E2B	92.5968	0.429103	0.220118	1.94943	0.0512442	0.332336
ENSG00000196092-PAX5	460.136	0.279045	0.143126	1.94964	0.0512188	0.332336
ENSG00000197442-MAP3K5	50.9009	0.560888	0.287712	1.94948	0.0512382	0.332336
ENSG00000244491-AL021707.5	69.9392	0.490301	0.25162	1.94857	0.0513464	0.332336
ENSG00000249855-EEF1A1P19	14.3029	1.13734	0.583305	1.94981	0.0511983	0.332336
ENSG00000055950-MRPL43	34.2821	-0.671799	0.345057	-1.94692	0.0515438	0.332915
ENSG00000167470-MIDN	77.3491	0.468205	0.240462	1.9471	0.0515224	0.332915
ENSG00000187961-KLHL17	14.8184	-1.06004	0.544974	-1.94512	0.0517603	0.334104
ENSG00000128692-EIF2S2P4	44.2523	-0.587731	0.302248	-1.94453	0.0518314	0.334353
ENSG00000143641-GALNT2	165.726	0.360397	0.185589	1.94191	0.0521477	0.336183
ENSG00000163812-ZDHHC3	21.1643	-0.830915	0.428015	-1.94132	0.052219	0.336221
ENSG00000273149-AL138963.3	33.6747	0.716045	0.368834	1.94138	0.0522127	0.336221
ENSG00000247271-ZBED5-AS1	9.25113	1.26894	0.653871	1.94066	0.0523001	0.336533
ENSG00000101194-SLC17A9	156.058	0.361495	0.186395	1.9394	0.0524521	0.336753
ENSG00000166783-MARF1	42.011	0.611166	0.315124	1.93944	0.0524472	0.336753
ENSG00000169083-AR	92.0459	-0.436596	0.225044	-1.94005	0.0523736	0.336753
ENSG00000169764-UGP2	53.4871	-0.540591	0.278756	-1.9393	0.0524653	0.336753
ENSG00000158863-FAM160B2	26.286	0.75297	0.388507	1.93811	0.0526093	0.337381
ENSG00000228843-AL133410.2	21.3978	0.843624	0.435316	1.93796	0.0526287	0.337381
ENSG00000169203-NPIPB12	61.7383	0.529681	0.273555	1.93629	0.0528324	0.338266
ENSG00000175414-ARL10	13.7637	-1.03379	0.533834	-1.93654	0.0528019	0.338266
ENSG00000101311-FERMT1	25.8513	-0.757032	0.391235	-1.93498	0.0529927	0.338999
ENSG00000145912-NHP2	71.0193	-0.501772	0.259338	-1.93482	0.0530129	0.338999
ENSG00000198862-LTN1	43.3435	0.601022	0.310758	1.93405	0.0531069	0.339389
ENSG00000170632-ARMC10	23.6835	-0.850066	0.439846	-1.93264	0.0532802	0.340285
ENSG00000100410-PHF5A	29.3485	-0.715935	0.370595	-1.93185	0.0533781	0.340488
ENSG00000205250-E2F4	38.2227	0.682622	0.353339	1.93192	0.0533692	0.340488
ENSG00000174749-FAM241A	70.5533	0.503054	0.260508	1.93105	0.0534767	0.340906
ENSG00000114650-SCAP	69.1105	-0.482744	0.250168	-1.92968	0.0536471	0.341569
ENSG00000129128-SPCS3	94.6052	-0.416835	0.215991	-1.92987	0.0536223	0.341569
ENSG00000044524-EPHA3	9.32573	-1.3012	0.674963	-1.92781	0.0538788	0.342181
ENSG00000048544-MRPS10	66.6861	-0.483017	0.250469	-1.92845	0.053799	0.342181
ENSG00000048707-VPS13D	14.979	1.00233	0.520001	1.92756	0.0539096	0.342181
ENSG00000234036-TXNP6	11.2753	1.26639	0.656969	1.92762	0.053902	0.342181
__alignment_not_unique-	234754	0.189279	0.0981623	1.92823	0.0538269	0.342181
ENSG00000120053-GOT1	21.0966	-0.824459	0.427855	-1.92696	0.0539851	0.342389
ENSG00000204267-TAP2	48.8312	-0.578597	0.300294	-1.92677	0.0540089	0.342389
ENSG00000105447-GRWD1	40.2479	-0.611151	0.317263	-1.92632	0.0540641	0.342528
ENSG00000136504-KAT7	38.6397	-0.643754	0.334427	-1.92494	0.0542365	0.342623
ENSG00000138834-MAPK8IP3	26.8179	0.804105	0.417641	1.92535	0.0541854	0.342623
ENSG00000242372-EIF6	27.151	-0.803511	0.417479	-1.92468	0.0542698	0.342623
ENSG00000248794-AC026436.1	118.307	-0.405603	0.210602	-1.92592	0.0541146	0.342623
ENSG00000268027-AC243960.1	11.8607	1.12124	0.582581	1.9246	0.0542789	0.342623
ENSG00000279692-AC110285.7	12.0183	1.09075	0.566541	1.92528	0.0541944	0.342623
ENSG00000204922-UQCC3	32.9348	-0.666398	0.346429	-1.92362	0.0544023	0.343192
ENSG00000100836-PABPN1	569.11	0.291803	0.151861	1.92152	0.0546666	0.343595
ENSG00000111837-MAK	8.39351	1.41443	0.736072	1.92159	0.0546573	0.343595
ENSG00000116288-PARK7	199.19	-0.311979	0.162336	-1.92182	0.0546289	0.343595
ENSG00000118412-CASP8AP2	31.7472	-0.690366	0.359095	-1.92251	0.0545412	0.343595
ENSG00000149308-NPAT	37.4545	-0.658398	0.34243	-1.92272	0.0545153	0.343595
ENSG00000178605-GTPBP6	25.9329	-0.803343	0.417998	-1.92188	0.0546203	0.343595
ENSG00000169567-HINT1	788.097	-0.270308	0.140736	-1.92068	0.0547726	0.343665
ENSG00000188938-FAM120AOS	47.0334	0.571703	0.297643	1.92077	0.0547607	0.343665
ENSG00000280800-FP671120.3	7432.95	0.620769	0.323211	1.92063	0.054778	0.343665
ENSG00000119866-BCL11A	226.431	-0.301774	0.157184	-1.91988	0.0548736	0.344055
ENSG00000261604-AC114947.2	61.0318	-0.504229	0.262735	-1.91915	0.0549652	0.34442
ENSG00000285762-AC253536.7	150.479	-0.355347	0.185254	-1.91816	0.0550908	0.344997
ENSG00000127586-CHTF18	42.5034	-0.706649	0.368463	-1.91783	0.0551329	0.34505
ENSG00000101004-NINL	17.3154	0.904901	0.472045	1.91698	0.0552403	0.345371
ENSG00000259891-AC107375.1	29.2563	0.709364	0.370059	1.91689	0.0552513	0.345371
ENSG00000103202-NME4	139.455	-0.351548	0.18345	-1.91632	0.0553242	0.345617
ENSG00000177963-RIC8A	46.3404	-0.580496	0.302998	-1.91584	0.0553853	0.345788
ENSG00000105327-BBC3	9.06786	-1.30158	0.679534	-1.91541	0.0554407	0.345924
ENSG00000009954-BAZ1B	173.335	-0.335137	0.175065	-1.91436	0.0555739	0.346126
ENSG00000112984-KIF20A	23.1779	-0.893485	0.466724	-1.91437	0.0555723	0.346126
ENSG00000136026-CKAP4	176.346	-0.375664	0.196187	-1.91482	0.055515	0.346126
ENSG00000128595-CALU	75.4317	-0.457217	0.238891	-1.91392	0.0556307	0.34627
ENSG00000137807-KIF23	24.0387	-0.779766	0.407751	-1.91236	0.0558305	0.346819
ENSG00000162073-PAQR4	62.1322	-0.536631	0.280619	-1.91231	0.0558366	0.346819
ENSG00000168300-PCMTD1	23.7229	0.766601	0.400905	1.91217	0.0558538	0.346819
ENSG00000189136-UBE2Q2P1	25.749	0.847107	0.442874	1.91275	0.0557801	0.346819
ENSG00000072364-AFF4	38.8279	0.63976	0.334787	1.91095	0.0560112	0.347587
ENSG00000135999-EPC2	28.8418	0.709725	0.371923	1.90826	0.0563578	0.349176
ENSG00000150779-TIMM8B	125.615	-0.403247	0.211319	-1.90824	0.0563601	0.349176
ENSG00000185624-P4HB	107.205	-0.398658	0.208922	-1.90817	0.056369	0.349176
ENSG00000124508-BTN2A2	10.8891	1.13808	0.596656	1.90743	0.0564651	0.349561
ENSG00000115355-CCDC88A	355.722	0.275936	0.144694	1.90703	0.056517	0.349671
ENSG00000070610-GBA2	16.6872	1.00465	0.527674	1.90392	0.0569205	0.351956
ENSG00000129007-CALML4	18.0192	0.914667	0.480589	1.90322	0.0570118	0.352309
ENSG00000152926-ZNF117	23.8471	0.799096	0.420073	1.90228	0.0571345	0.352665
ENSG00000168216-LMBRD1	13.9685	1.03723	0.545341	1.90199	0.0571723	0.352665
ENSG00000272196-HIST2H2AA4	10.47	1.23505	0.649276	1.9022	0.0571455	0.352665
ENSG00000234883-MIR155HG	14.5203	1.05632	0.555802	1.90053	0.0573641	0.353637
ENSG00000179041-RRS1	40.8911	-0.595033	0.313367	-1.89884	0.0575861	0.354667
ENSG00000285410-GABPB1-IT1	34.4935	0.63638	0.335161	1.89873	0.0576002	0.354667
ENSG00000221823-PPP3R1	65.6372	-0.480994	0.253481	-1.89755	0.0577553	0.35541
__not_aligned-	225344	0.236376	0.124586	1.89729	0.05779	0.35541
ENSG00000215030-RPL13P12	378.704	0.281609	0.148534	1.89592	0.0579705	0.356307
ENSG00000087365-SF3B2	188.697	-0.327752	0.172948	-1.89509	0.0580801	0.356741
ENSG00000100325-ASCC2	23.468	0.794297	0.419358	1.89408	0.0582145	0.356741
ENSG00000107438-PDLIM1	138.783	-0.37989	0.200505	-1.89467	0.0581361	0.356741
ENSG00000129680-MAP7D3	83.1726	-0.44095	0.23278	-1.89427	0.058189	0.356741
ENSG00000275139-AL133492.1	28.2082	0.719443	0.379822	1.89416	0.0582035	0.356741
ENSG00000158470-B4GALT5	21.345	-0.86279	0.45575	-1.89312	0.0583421	0.35731
ENSG00000185946-RNPC3	92.2343	0.53293	0.281814	1.89107	0.0586154	0.358771
ENSG00000147155-EBP	35.6345	-0.635198	0.336398	-1.88823	0.0589949	0.360763
ENSG00000178307-TMEM11	23.2889	-0.793204	0.42027	-1.88737	0.0591111	0.360763
ENSG00000179598-PLD6	18.8658	-0.886836	0.469792	-1.88772	0.0590635	0.360763
ENSG00000232043-AL133230.1	29.9899	0.706657	0.374335	1.88777	0.0590574	0.360763
ENSG00000253731-PCDHGA6	38.2506	0.63883	0.338484	1.88733	0.0591161	0.360763
ENSG00000124733-MEA1	98.6049	-0.446609	0.236777	-1.8862	0.059268	0.361475
ENSG00000086619-ERO1B	54.9263	0.54578	0.289403	1.88589	0.0593104	0.361519
ENSG00000197694-SPTAN1	40.6689	0.611471	0.324302	1.8855	0.0593622	0.361621
ENSG00000162377-COA7	26.9605	-0.739748	0.392452	-1.88494	0.0594379	0.361868
ENSG00000173171-MTX1	26.5991	-0.724539	0.384639	-1.88368	0.0596079	0.362688
ENSG00000148399-DPH7	31.2999	0.67433	0.358049	1.88334	0.059654	0.362754
ENSG00000249353-NPM1P27	43.9873	-0.614211	0.326205	-1.8829	0.0597142	0.362906
ENSG00000114346-ECT2	23.8408	-0.785461	0.417317	-1.88217	0.0598129	0.363291
ENSG00000062194-GPBP1	149.285	0.34489	0.18348	1.87972	0.0601462	0.363483
ENSG00000087448-KLHL42	76.061	0.479519	0.25505	1.88009	0.0600953	0.363483
ENSG00000116455-WDR77	45.2824	-0.557271	0.296442	-1.87986	0.060127	0.363483
ENSG00000132967-HMGB1P5	1147.59	-0.222714	0.11849	-1.8796	0.0601625	0.363483
ENSG00000146592-CREB5	104.217	0.401982	0.213789	1.88028	0.0600703	0.363483
ENSG00000161980-POLR3K	53.8666	-0.533678	0.283686	-1.88123	0.0599408	0.363483
ENSG00000166197-NOLC1	112.478	-0.380368	0.202204	-1.88111	0.0599572	0.363483
ENSG00000166479-TMX3	25.0521	0.766734	0.407537	1.88138	0.0599197	0.363483
ENSG00000177425-PAWR	32.6787	-0.670319	0.356583	-1.87984	0.06013	0.363483
ENSG00000060491-OGFR	31.5715	-0.694948	0.369809	-1.87921	0.0602164	0.363595
ENSG00000132661-NXT1	34.2277	-0.737199	0.392451	-1.87845	0.0603197	0.363922
ENSG00000174851-YIF1A	28.6558	-0.68963	0.367158	-1.87829	0.0603413	0.363922
ENSG00000156876-SASS6	35.2782	-0.626382	0.33362	-1.87753	0.060445	0.364144
ENSG00000163655-GMPS	84.3915	-0.448503	0.238886	-1.87748	0.0604522	0.364144
ENSG00000223697-AF230666.1	19.6583	0.843941	0.449563	1.87725	0.0604843	0.364144
ENSG00000204406-MBD5	39.3503	0.634808	0.338254	1.87672	0.0605567	0.364367
ENSG00000073614-KDM5A	141.896	0.347075	0.184967	1.87642	0.0605973	0.364399
ENSG00000165092-ALDH1A1	51.3924	-0.526682	0.280757	-1.87593	0.0606645	0.36459
ENSG00000077684-JADE1	70.0622	-0.463472	0.247192	-1.87495	0.0607996	0.365188
ENSG00000100281-HMGXB4	93.1893	-0.420277	0.224373	-1.87312	0.0610523	0.366492
ENSG00000145979-TBC1D7	48.1761	0.582003	0.311035	1.87118	0.0613199	0.367669
ENSG00000257390-AC023055.1	86.2782	-0.428907	0.229209	-1.87125	0.0613108	0.367669
ENSG00000105655-ISYNA1	27.1991	-0.737484	0.394228	-1.8707	0.0613863	0.367853
ENSG00000081870-HSPB11	49.5945	-0.578203	0.309179	-1.87013	0.0614664	0.367992
ENSG00000148218-ALAD	8.37613	1.36004	0.727288	1.87002	0.061481	0.367992
ENSG00000183741-CBX6	128.335	-0.359793	0.19244	-1.86963	0.0615346	0.368098
ENSG00000103275-UBE2I	166.52	-0.326916	0.174895	-1.86921	0.0615931	0.368235
ENSG00000139233-LLPH	50.5801	-0.527395	0.282296	-1.86823	0.0617299	0.368838
ENSG00000115464-USP34	281.262	0.278331	0.149039	1.86751	0.0618308	0.369227
ENSG00000105171-POP4	17.1661	-0.906004	0.485641	-1.86558	0.0620997	0.369471
ENSG00000129810-SGO1	28.3229	-0.691183	0.37045	-1.86579	0.0620706	0.369471
ENSG00000164024-METAP1	42.0279	-0.583205	0.312436	-1.86664	0.0619519	0.369471
ENSG00000168090-COPS6	68.3259	-0.468714	0.25115	-1.86627	0.0620032	0.369471
ENSG00000196591-HDAC2	68.6257	-0.47921	0.256892	-1.86542	0.0621231	0.369471
ENSG00000240036-AC104563.1	112.214	0.452717	0.242616	1.86598	0.0620444	0.369471
ENSG00000277967-RF02217	89.5826	1.116	0.5982	1.86559	0.0620989	0.369471
ENSG00000114857-NKTR	662.465	0.260129	0.139516	1.86451	0.0622497	0.37001
ENSG00000123983-ACSL3	59.3351	-0.520224	0.279093	-1.86398	0.062325	0.370244
ENSG00000107036-RIC1	46.6313	0.543538	0.291662	1.86359	0.0623795	0.370354
ENSG00000225339-AL354740.1	149.916	0.339215	0.18213	1.86249	0.0625337	0.371055
ENSG00000174607-UGT8	13.9241	-0.996348	0.535274	-1.86138	0.062691	0.371774
ENSG00000160299-PCNT	90.3953	-0.426635	0.22937	-1.86003	0.0628815	0.372474
ENSG00000170340-B3GNT2	45.2981	-0.599572	0.322339	-1.86007	0.0628761	0.372474
ENSG00000275632-AL035461.2	15.8296	-0.971723	0.522563	-1.85953	0.0629515	0.372674
ENSG00000100591-AHSA1	106.278	-0.386765	0.208047	-1.85903	0.0630232	0.372884
ENSG00000171109-MFN1	18.3475	0.882928	0.475298	1.85763	0.0632217	0.373843
ENSG00000162923-WDR26	39.5724	0.620396	0.334456	1.85494	0.0636046	0.375892
ENSG00000126773-PCNX4	98.448	0.397003	0.214081	1.85446	0.063674	0.376024
ENSG00000131115-ZNF227	13.0162	1.00099	0.539849	1.85421	0.0637093	0.376024
ENSG00000155966-AFF2	52.5195	0.539396	0.29094	1.85398	0.0637426	0.376024
ENSG00000175354-PTPN2	58.1336	-0.490214	0.264479	-1.85351	0.0638097	0.376024
ENSG00000223960-PRKRA-AS1	20.9344	0.834604	0.450236	1.8537	0.0637817	0.376024
ENSG00000051825-MPHOSPH9	77.3333	-0.450977	0.243523	-1.85189	0.0640422	0.377167
ENSG00000186628-FSD2	15.855	0.933445	0.504117	1.85164	0.064077	0.377167
ENSG00000134287-ARF3	42.7939	-0.566758	0.306231	-1.85075	0.0642049	0.377704
ENSG00000102882-MAPK3	13.2368	-1.00165	0.54139	-1.85014	0.0642933	0.378008
ENSG00000132155-RAF1	39.3312	0.587537	0.318175	1.84658	0.0648073	0.380217
ENSG00000134077-THUMPD3	38.6586	-0.604496	0.32735	-1.84664	0.0647998	0.380217
ENSG00000156261-CCT8	234.741	-0.289939	0.156966	-1.84715	0.064726	0.380217
ENSG00000243147-MRPL33	141.974	0.431445	0.233653	1.84652	0.0648168	0.380217
ENSG00000143013-LMO4	74.9524	-0.453088	0.245434	-1.84607	0.0648826	0.380386
ENSG00000106636-YKT6	46.5981	-0.539095	0.292111	-1.84551	0.0649631	0.380641
ENSG00000105875-WDR91	13.2113	1.02312	0.554466	1.84523	0.0650034	0.38066
ENSG00000151247-EIF4E	56.9228	-0.495956	0.26896	-1.84397	0.0651868	0.381084
ENSG00000163918-RFC4	33.4264	-0.634269	0.343964	-1.844	0.0651833	0.381084
ENSG00000197472-ZNF695	9.74051	-1.23554	0.669987	-1.84413	0.0651644	0.381084
ENSG00000144395-CCDC150	26.1248	-0.766944	0.416366	-1.842	0.0654757	0.382555
ENSG00000166451-CENPN	21.0762	-0.816563	0.443367	-1.84173	0.0655146	0.382565
ENSG00000100023-PPIL2	29.2105	0.686864	0.37319	1.84052	0.0656921	0.382805
ENSG00000125901-MRPS26	57.2187	-0.490128	0.26624	-1.84093	0.0656324	0.382805
ENSG00000131149-GSE1	41.4475	0.596394	0.323925	1.84115	0.0656002	0.382805
ENSG00000277791-PSMB3	57.4561	-0.533642	0.289954	-1.84043	0.0657046	0.382805
ENSG00000130433-CACNG6	11.5296	1.1445	0.622339	1.83903	0.0659104	0.383177
ENSG00000248923-MTND5P11	235.591	0.38917	0.211622	1.83899	0.0659174	0.383177
ENSG00000257167-TMPO-AS1	16.8057	-0.918181	0.499192	-1.83934	0.0658658	0.383177
ENSG00000280614-FP236383.2	7491.02	0.613462	0.3335	1.83946	0.065847	0.383177
ENSG00000148296-SURF6	57.6853	-0.526042	0.286131	-1.83847	0.0659936	0.383404
ENSG00000100567-PSMA3	113.594	-0.395284	0.215137	-1.83736	0.0661563	0.383916
ENSG00000143401-ANP32E	83.9827	-0.446838	0.243184	-1.83745	0.0661433	0.383916
ENSG00000125656-CLPP	51.153	-0.512332	0.278888	-1.83705	0.0662023	0.383966
ENSG00000273899-NOL12	40.2057	-0.597341	0.325331	-1.8361	0.0663423	0.384561
ENSG00000178057-NDUFAF3	65.7421	-0.510461	0.278149	-1.83521	0.0664753	0.384898
ENSG00000262831-AC145207.3	78.1464	-0.437981	0.238634	-1.83536	0.0664517	0.384898
ENSG00000236263-AC234582.2	22.4352	-0.771854	0.420816	-1.83419	0.0666264	0.385556
ENSG00000204261-PSMB8-AS1	44.0086	0.568818	0.310208	1.83366	0.0667039	0.385788
ENSG00000163811-WDR43	224.42	-0.291544	0.159102	-1.83244	0.0668864	0.386123
ENSG00000169641-LUZP1	57.4943	0.509194	0.277904	1.83226	0.0669121	0.386123
ENSG00000172172-MRPL13	47.6383	-0.65428	0.357084	-1.83228	0.0669091	0.386123
ENSG00000267680-ZNF224	18.0794	0.892528	0.486983	1.83277	0.0668364	0.386123
ENSG00000175215-CTDSP2	26.7029	0.700782	0.382593	1.83166	0.0670015	0.386207
ENSG00000196275-GTF2IRD2	29.1476	0.666028	0.363596	1.83178	0.0669844	0.386207
ENSG00000004961-HCCS	20.9512	-0.801654	0.437951	-1.83046	0.0671806	0.387022
ENSG00000120129-DUSP1	19.0446	0.837539	0.457713	1.82983	0.067275	0.387198
ENSG00000183765-CHEK2	16.314	-0.977839	0.53441	-1.82976	0.0672865	0.387198
ENSG00000229994-RPL5P4	169.709	0.324562	0.177446	1.82908	0.0673884	0.387568
ENSG00000092853-CLSPN	60.9002	-0.498357	0.272695	-1.82753	0.0676203	0.388251
ENSG00000184232-OAF	20.7768	-0.808805	0.442461	-1.82797	0.0675546	0.388251
ENSG00000205534-SMG1P2	17.6673	0.869332	0.475636	1.82772	0.0675909	0.388251
ENSG00000198901-PRC1	90.0343	-0.413279	0.226213	-1.82695	0.067707	0.388532
ENSG00000136897-MRPL50	13.0872	-1.01077	0.55368	-1.82555	0.0679175	0.389522
ENSG00000012660-ELOVL5	99.6883	-0.396152	0.217039	-1.82525	0.0679626	0.389556
ENSG00000163132-MSX1	69.9099	0.464932	0.254756	1.82501	0.0679991	0.389556
ENSG00000088854-C20orf194	19.7127	0.804928	0.441222	1.82431	0.0681045	0.389943
ENSG00000186575-NF2	38.1414	-0.590348	0.323825	-1.82304	0.0682968	0.390826
ENSG00000135747-ZNF670-ZNF695	8.47839	-1.32202	0.725387	-1.8225	0.0683795	0.391082
ENSG00000256269-HMBS	19.4624	-0.834337	0.458086	-1.82135	0.068553	0.391857
ENSG00000119421-NDUFA8	73.7818	-0.46028	0.252783	-1.82085	0.0686302	0.391878
ENSG00000182180-MRPS16	99.4423	-0.38268	0.210168	-1.82083	0.0686329	0.391878
ENSG00000143442-POGZ	73.5332	0.440202	0.241831	1.82029	0.0687151	0.39213
ENSG00000220583-RPL35P2	27.6342	0.717176	0.394233	1.81917	0.0688856	0.392885
ENSG00000100811-YY1	154.423	-0.333367	0.183338	-1.81832	0.0690153	0.393189
ENSG00000113407-TARS	185.267	-0.340756	0.187397	-1.81836	0.0690085	0.393189
ENSG00000116754-SRSF11	863.499	0.212948	0.117147	1.81779	0.0690964	0.393433
ENSG00000163026-WDCP	11.7297	-1.12205	0.617755	-1.81633	0.0693198	0.394269
ENSG00000240303-ACAD11	8.20128	1.28717	0.708663	1.81633	0.06932	0.394269
ENSG00000179523-EIF3J-DT	11.3761	1.11593	0.614572	1.81579	0.0694029	0.394305
ENSG00000260914-AC026464.4	14.1585	-0.948823	0.522508	-1.8159	0.0693853	0.394305
ENSG00000123064-DDX54	75.4982	-0.442222	0.243653	-1.81496	0.0695294	0.394588
ENSG00000177150-FAM210A	21.8978	-0.774936	0.426918	-1.81519	0.0694948	0.394588
ENSG00000011260-UTP18	40.9622	-0.581122	0.320504	-1.81315	0.0698084	0.395224
ENSG00000038219-BOD1L1	69.373	0.46229	0.254873	1.81381	0.0697074	0.395224
ENSG00000087301-TXNDC16	19.4173	-0.814793	0.449482	-1.81274	0.0698719	0.395224
ENSG00000146729-NIPSNAP2	67.0492	-0.457454	0.252352	-1.81277	0.069868	0.395224
ENSG00000198265-HELZ	62.5153	0.484319	0.267156	1.81286	0.0698527	0.395224
ENSG00000253846-PCDHGA10	34.3384	0.664389	0.366355	1.81351	0.0697526	0.395224
ENSG00000130560-UBAC1	47.3006	-0.586815	0.323783	-1.81237	0.0699287	0.395288
ENSG00000204435-CSNK2B	138.359	-0.370871	0.204656	-1.81217	0.0699602	0.395288
ENSG00000113811-SELENOK	49.4334	-0.538231	0.297175	-1.81116	0.0701169	0.395956
ENSG00000028310-BRD9	107.189	-0.404305	0.22334	-1.81027	0.0702543	0.396515
ENSG00000214050-FBXO16	41.3485	-0.576554	0.318641	-1.80941	0.0703866	0.397044
ENSG00000144580-CNOT9	69.1948	-0.47698	0.263702	-1.80879	0.0704843	0.397377
ENSG00000182934-SRPRA	27.506	0.746326	0.412692	1.80844	0.0705388	0.397466
ENSG00000121879-PIK3CA	29.5544	0.654264	0.361985	1.80743	0.0706945	0.398126
ENSG00000128228-SDF2L1	45.0709	-0.5802	0.321177	-1.80648	0.0708429	0.398308
ENSG00000141543-EIF4A3	51.3031	-0.57951	0.32076	-1.80668	0.0708126	0.398308
ENSG00000279641-AC120057.3	138.671	-0.358534	0.198444	-1.80673	0.070805	0.398308
ENSG00000116198-CEP104	33.6313	0.615287	0.340686	1.80602	0.0709148	0.398494
ENSG00000275029-HMGB1P24	90.918	-0.408684	0.226361	-1.80546	0.0710034	0.398774
ENSG00000110917-MLEC	130.56	-0.345616	0.191527	-1.80453	0.071149	0.399156
ENSG00000273611-ZNHIT3	61.6544	-0.468536	0.259627	-1.80465	0.0711301	0.399156
ENSG00000213186-TRIM59	104.466	-0.422056	0.234022	-1.80349	0.0713112	0.399848
ENSG00000001630-CYP51A1	19.2699	-0.815129	0.452095	-1.803	0.0713878	0.400059
ENSG00000068912-ERLEC1	26.0755	0.703353	0.390256	1.80229	0.0715004	0.400472
ENSG00000085377-PREP	8.8756	-1.2536	0.696002	-1.80114	0.0716802	0.401261
ENSG00000135486-HNRNPA1	652.661	0.253114	0.140557	1.80079	0.0717356	0.401353
ENSG00000280138-AC027290.2	22.1648	0.79074	0.439379	1.79968	0.0719117	0.402119
ENSG00000059758-CDK17	11.812	1.03701	0.57657	1.79858	0.0720851	0.402636
ENSG00000101745-ANKRD12	87.5213	0.396194	0.220283	1.79857	0.0720865	0.402636
ENSG00000254873-AP001267.1	22.3906	0.817355	0.454503	1.79835	0.0721214	0.402636
ENSG00000095585-BLNK	122.885	0.385405	0.21437	1.79785	0.0722011	0.402644
ENSG00000177479-ARIH2	119.33	0.374294	0.208183	1.79791	0.072191	0.402644
ENSG00000168283-BMI1	143.29	0.334144	0.185981	1.79666	0.0723901	0.403156
ENSG00000203879-GDI1	21.3501	0.757412	0.421598	1.79653	0.0724106	0.403156
ENSG00000259357-AL590133.2	16.7414	0.945835	0.526455	1.79661	0.0723976	0.403156
ENSG00000101104-PABPC1L	16.5966	0.904158	0.503563	1.79552	0.0725706	0.403453
ENSG00000117713-ARID1A	137.058	0.34522	0.192256	1.79563	0.0725531	0.403453
ENSG00000244754-N4BP2L2	180.76	0.370621	0.206422	1.79545	0.0725815	0.403453
ENSG00000163382-NAXE	46.0674	-0.529359	0.294946	-1.79477	0.0726908	0.403624
ENSG00000269656-NOP53-AS1	26.3251	0.684321	0.381241	1.79498	0.0726561	0.403624
ENSG00000143570-SLC39A1	20.7451	-0.810514	0.451685	-1.79442	0.0727455	0.40371
ENSG00000124784-RIOK1	87.3538	-0.411872	0.229564	-1.79415	0.0727894	0.403736
ENSG00000153140-CETN3	98.8703	-0.398112	0.221996	-1.79333	0.0729206	0.404246
ENSG00000102054-RBBP7	81.397	-0.413582	0.230666	-1.79299	0.072974	0.404324
ENSG00000143314-MRPL24	66.2126	-0.468801	0.261633	-1.79183	0.0731602	0.404919
ENSG00000240729-AC146507.2	9.2151	1.19781	0.668431	1.79198	0.0731368	0.404919
ENSG00000104903-LYL1	30.1966	0.668419	0.373304	1.79055	0.0733655	0.40506
ENSG00000125347-IRF1	31.4154	-0.635849	0.35508	-1.79072	0.073338	0.40506
ENSG00000162378-ZYG11B	22.3501	0.754567	0.421402	1.79061	0.0733556	0.40506
ENSG00000163516-ANKZF1	41.8309	0.56603	0.316183	1.7902	0.0734217	0.40506
ENSG00000171914-TLN2	32.6335	-0.622954	0.347972	-1.79024	0.0734154	0.40506
ENSG00000252690-AC105339.2	15.3653	0.920442	0.514036	1.79062	0.0733546	0.40506
ENSG00000084623-EIF3I	107.394	-0.390136	0.218043	-1.78927	0.0735718	0.405601
ENSG00000235297-FAUP1	160.631	-0.321566	0.179736	-1.7891	0.0735987	0.405601
ENSG00000277887-SNORA50C	15.7248	-0.951997	0.532362	-1.78825	0.0737356	0.405921
ENSG00000281311-RF00407	15.7248	-0.951997	0.532362	-1.78825	0.0737356	0.405921
ENSG00000116539-ASH1L	130.628	0.348078	0.194743	1.78737	0.0738772	0.406265
ENSG00000142188-TMEM50B	32.0866	0.651289	0.364341	1.78758	0.0738437	0.406265
ENSG00000065491-TBC1D22B	9.86965	1.1327	0.633948	1.78674	0.073979	0.406585
ENSG00000196550-FAM72A	17.8497	-0.834935	0.467352	-1.78652	0.0740143	0.406585
ENSG00000069329-VPS35	72.2229	-0.431107	0.241451	-1.78548	0.0741831	0.406675
ENSG00000072778-ACADVL	74.3166	0.448074	0.251043	1.78485	0.0742859	0.406675
ENSG00000099783-HNRNPM	414.891	-0.258321	0.144686	-1.78539	0.0741982	0.406675
ENSG00000118705-RPN2	92.7615	-0.415685	0.232845	-1.78525	0.0742214	0.406675
ENSG00000123685-BATF3	12.9709	-1.01021	0.565929	-1.78504	0.0742543	0.406675
ENSG00000152936-LMNTD1	14.7267	0.92738	0.519475	1.78523	0.0742248	0.406675
ENSG00000186665-C17orf58	16.6043	-0.944062	0.52897	-1.78472	0.0743074	0.406675
ENSG00000091947-TMEM101	13.9931	0.965689	0.542037	1.78159	0.0748156	0.407814
ENSG00000100297-MCM5	64.2854	-0.452011	0.253576	-1.78255	0.0746599	0.407814
ENSG00000117691-NENF	71.7754	-0.437913	0.245846	-1.78125	0.0748723	0.407814
ENSG00000125170-DOK4	32.0858	0.621151	0.348656	1.78156	0.0748216	0.407814
ENSG00000127564-PKMYT1	64.982	-0.493333	0.276815	-1.78218	0.0747204	0.407814
ENSG00000129657-SEC14L1	25.3117	0.745749	0.418454	1.78215	0.0747244	0.407814
ENSG00000156976-EIF4A2	136.041	0.365505	0.205165	1.78151	0.074829	0.407814
ENSG00000224712-NPIPA3	10.1877	1.08796	0.610735	1.78139	0.0748487	0.407814
ENSG00000229989-MIR181A1HG	19.953	0.849134	0.476696	1.78129	0.0748647	0.407814
ENSG00000089820-ARHGAP4	93.2255	0.40266	0.226105	1.78086	0.0749361	0.407838
ENSG00000094916-CBX5	247.77	-0.270434	0.151876	-1.78062	0.0749743	0.407838
ENSG00000127540-UQCR11	116.908	-0.37391	0.210004	-1.78049	0.0749957	0.407838
ENSG00000006712-PAF1	14.5225	-0.916136	0.514841	-1.77945	0.0751655	0.408229
ENSG00000084463-WBP11	79.1847	-0.423116	0.237796	-1.77932	0.0751865	0.408229
ENSG00000140374-ETFA	106.892	-0.406865	0.228662	-1.77933	0.0751854	0.408229
ENSG00000143543-JTB	108.084	-0.368017	0.206895	-1.77876	0.0752784	0.408512
ENSG00000103111-MON1B	45.1456	0.568796	0.319905	1.77802	0.075401	0.408767
ENSG00000109475-RPL34	2784.26	0.237339	0.133516	1.77761	0.0754685	0.408767
ENSG00000189091-SF3B3	67.1209	-0.456035	0.256524	-1.77775	0.075445	0.408767
ENSG00000235194-PPP1R3E	17.0711	0.855069	0.481049	1.77751	0.0754843	0.408767
ENSG00000010318-PHF7	10.9214	1.09941	0.618938	1.77629	0.0756851	0.409372
ENSG00000074842-MYDGF	49.649	-0.507859	0.285956	-1.776	0.0757321	0.409372
ENSG00000089248-ERP29	64.5407	-0.519643	0.292634	-1.77575	0.0757746	0.409372
ENSG00000157540-DYRK1A	49.9827	0.534286	0.300922	1.7755	0.075816	0.409372
ENSG00000178295-GEN1	38.0079	-0.585363	0.329661	-1.77565	0.0757901	0.409372
ENSG00000185009-AP3M1	18.8396	0.834135	0.469834	1.77538	0.0758346	0.409372
ENSG00000100393-EP300	68.5661	0.457109	0.257564	1.77474	0.0759403	0.40969
ENSG00000125726-CD70	12.1421	-1.02036	0.574997	-1.77454	0.0759733	0.40969
ENSG00000168795-ZBTB5	10.2247	-1.08613	0.612356	-1.77369	0.0761149	0.410239
ENSG00000106028-SSBP1	161.932	-0.335745	0.189392	-1.77275	0.0762708	0.410699
ENSG00000106615-RHEB	41.3132	-0.566258	0.319645	-1.77152	0.0764736	0.410699
ENSG00000109686-SH3D19	140.269	0.752267	0.424612	1.77166	0.0764513	0.410699
ENSG00000140400-MAN2C1	24.6824	0.756163	0.426902	1.77128	0.0765144	0.410699
ENSG00000159069-FBXW5	27.8159	-0.685163	0.386545	-1.77253	0.0763062	0.410699
ENSG00000197976-AKAP17A	52.6216	0.501765	0.283283	1.77125	0.0765197	0.410699
ENSG00000215472-RPL17-C18orf32	799.583	0.217434	0.122708	1.77196	0.0764007	0.410699
ENSG00000262877-AC110285.2	18.415	0.800701	0.452029	1.77135	0.0765027	0.410699
ENSG00000270170-NCBP2-AS2	42.9745	-0.565348	0.319348	-1.77032	0.0766738	0.411312
ENSG00000114480-GBE1	29.465	0.651316	0.36796	1.77007	0.0767151	0.411319
ENSG00000120802-TMPO	163.791	-0.34267	0.193632	-1.7697	0.0767771	0.4114
ENSG00000130489-SCO2	21.0122	-0.768021	0.434032	-1.7695	0.0768102	0.4114
ENSG00000078043-PIAS2	68.3729	0.470889	0.266201	1.76892	0.0769067	0.411496
ENSG00000143799-PARP1	492.153	0.245263	0.138652	1.76892	0.076908	0.411496
ENSG00000094914-AAAS	17.294	-0.880427	0.49804	-1.76778	0.0770971	0.412079
ENSG00000118307-CASC1	50.1045	0.54802	0.309964	1.76801	0.0770589	0.412079
ENSG00000134440-NARS	113.295	-0.369435	0.209046	-1.76724	0.0771872	0.412346
ENSG00000100241-SBF1	110.811	0.385075	0.217942	1.76687	0.07725	0.412468
ENSG00000102908-NFAT5	29.9243	0.646912	0.36623	1.76641	0.0773268	0.412526
ENSG00000148143-ZNF462	26.8416	0.702674	0.397816	1.76633	0.0773411	0.412526
ENSG00000183684-ALYREF	59.2796	-0.483988	0.274049	-1.76606	0.0773854	0.412549
ENSG00000127663-KDM4B	27.9546	0.685851	0.388409	1.76579	0.0774303	0.412574
ENSG00000122376-SHLD2	32.4718	-0.650155	0.368264	-1.76546	0.0774864	0.412659
ENSG00000186185-KIF18B	22.6274	-0.807049	0.45721	-1.76516	0.0775369	0.412714
ENSG00000229097-CALM2P2	11.3144	-1.01478	0.575063	-1.76463	0.0776255	0.412972
ENSG00000047621-C12orf4	21.7905	0.734379	0.416255	1.76425	0.0776891	0.413097
ENSG00000111786-SRSF9	194.023	-0.3406	0.193155	-1.76335	0.0778417	0.413695
ENSG00000166272-WBP1L	13.8569	0.943048	0.535062	1.7625	0.0779845	0.414024
ENSG00000200397-RF00019	9.62168	1.14935	0.652094	1.76255	0.0779764	0.414024
ENSG00000285772-AC000120.2	19.147	-0.799676	0.453777	-1.76227	0.0780243	0.414024
ENSG00000182307-C8orf33	86.3072	-0.389514	0.221123	-1.76153	0.0781488	0.414471
ENSG00000272316-AL021368.2	14.7714	0.932567	0.52993	1.75979	0.0784426	0.415815
ENSG00000177576-C18orf32	12.0953	0.985994	0.560469	1.75923	0.0785385	0.416109
ENSG00000114904-NEK4	14.7903	0.915657	0.520672	1.75861	0.0786446	0.416456
ENSG00000119655-NPC2	37.4127	0.588998	0.335167	1.75733	0.0788622	0.417394
ENSG00000109881-CCDC34	61.7758	-0.494403	0.281386	-1.75703	0.0789134	0.417406
ENSG00000196943-NOP9	26.5631	-0.665429	0.378817	-1.7566	0.0789862	0.417406
ENSG00000250966-AC023886.2	92.7545	-0.435614	0.247954	-1.75683	0.078946	0.417406
ENSG00000002746-HECW1	18.3804	0.871418	0.496233	1.75607	0.0790769	0.417483
ENSG00000154889-MPPE1	11.864	1.00733	0.573717	1.7558	0.0791225	0.417483
ENSG00000236901-MIR600HG	16.7065	0.849027	0.48352	1.75593	0.0791006	0.417483
ENSG00000114686-MRPL3	64.9079	-0.480877	0.273981	-1.75515	0.0792341	0.417657
ENSG00000264940-SNORD3C	32.9173	1.40475	0.800369	1.75513	0.0792366	0.417657
ENSG00000170759-KIF5B	150.894	-0.326574	0.186135	-1.7545	0.0793455	0.418016
ENSG00000100101-Z83844.1	34.3488	-0.613821	0.350067	-1.75344	0.0795263	0.418403
ENSG00000125798-FOXA2	8.71502	-1.17099	0.667842	-1.7534	0.0795331	0.418403
ENSG00000214078-CPNE1	96.0394	0.383314	0.218617	1.75336	0.079541	0.418403
ENSG00000172915-NBEA	12.3644	0.984739	0.561786	1.75287	0.079624	0.418412
ENSG00000225921-NOL7	100.714	-0.377692	0.215454	-1.75301	0.0796005	0.418412
ENSG00000276291-FRG1HP	41.9789	0.576174	0.328777	1.75248	0.0796913	0.418455
ENSG00000285508-AL034430.1	16.0168	-0.857702	0.489458	-1.75235	0.0797134	0.418455
ENSG00000101444-AHCY	77.0875	-0.424598	0.242412	-1.75155	0.0798505	0.418901
ENSG00000147874-HAUS6	48.6587	-0.537697	0.307013	-1.75138	0.0798799	0.418901
ENSG00000109756-RAPGEF2	32.1338	0.62238	0.355422	1.7511	0.0799283	0.418942
ENSG00000228861-RPL23AP12	15.6057	0.956936	0.546568	1.75081	0.0799786	0.418992
ENSG00000100097-LGALS1	38.3033	-0.579585	0.33126	-1.74963	0.0801814	0.419627
ENSG00000152409-JMY	24.95	0.685814	0.391942	1.74978	0.0801557	0.419627
ENSG00000163389-POGLUT1	42.6639	0.54494	0.311552	1.74912	0.080271	0.419669
ENSG00000276550-HERC2P2	32.6954	0.604011	0.345313	1.74917	0.0802618	0.419669
ENSG00000106803-SEC61B	85.6607	0.437491	0.250341	1.74758	0.0805364	0.420416
ENSG00000113758-DBN1	83.6289	-0.398038	0.227761	-1.74761	0.0805312	0.420416
ENSG00000260772-AC012321.1	9.54019	1.14752	0.656466	1.74802	0.0804602	0.420416
ENSG00000129083-COPB1	66.6809	0.462616	0.264805	1.74701	0.0806357	0.420721
ENSG00000143390-RFX5	32.2118	0.643968	0.368778	1.74622	0.0807731	0.421224
ENSG00000203812-HIST2H2AA3	9.04356	1.15006	0.658795	1.7457	0.0808636	0.421482
ENSG00000275764-AC092747.4	11.3766	1.06284	0.608943	1.74538	0.0809184	0.421554
ENSG00000168502-MTCL1	101.003	0.401263	0.229935	1.74511	0.0809657	0.421587
ENSG00000108984-MAP2K6	14.3773	-0.89894	0.515301	-1.74449	0.081073	0.421932
ENSG00000110619-CARS	60.5655	-0.473235	0.27158	-1.74252	0.0814168	0.422679
ENSG00000112983-BRD8	59.7656	0.500209	0.287018	1.74278	0.0813724	0.422679
ENSG00000165338-HECTD2	10.009	1.08136	0.620298	1.74329	0.0812829	0.422679
ENSG00000166200-COPS2	42.0355	0.554004	0.317937	1.74249	0.0814219	0.422679
ENSG00000171291-ZNF439	19.3769	0.787216	0.451719	1.74271	0.0813842	0.422679
ENSG00000076248-UNG	24.5218	-0.723613	0.415514	-1.74149	0.0815982	0.42316
ENSG00000096401-CDC5L	83.2345	-0.40745	0.234029	-1.74103	0.0816791	0.42316
ENSG00000233966-UBE2SP1	19.7033	-0.776929	0.446231	-1.74109	0.0816676	0.42316
ENSG00000258471-AL161668.3	35.379	0.667901	0.383569	1.74128	0.0816347	0.42316
ENSG00000111676-ATN1	13.712	1.06501	0.612065	1.74003	0.0818534	0.423719
ENSG00000226754-AL606760.1	23.2494	-0.724532	0.416411	-1.73994	0.0818693	0.423719
ENSG00000105576-TNPO2	131.038	-0.350117	0.201456	-1.73793	0.0822237	0.424621
ENSG00000126653-NSRP1	102.458	0.377267	0.217085	1.73788	0.0822323	0.424621
ENSG00000141753-IGFBP4	15.0364	-0.876586	0.504498	-1.73754	0.0822912	0.424621
ENSG00000149089-APIP	11.3803	1.17084	0.673816	1.73763	0.0822761	0.424621
ENSG00000168286-THAP11	40.4097	-0.57403	0.330192	-1.73848	0.0821271	0.424621
ENSG00000241846-AC092451.1	14.5883	0.905676	0.521013	1.7383	0.0821581	0.424621
ENSG00000054282-SDCCAG8	39.8169	0.555968	0.320128	1.73671	0.082439	0.424744
ENSG00000070010-UFD1	38.9972	-0.568219	0.327165	-1.7368	0.0824227	0.424744
ENSG00000198246-SLC29A3	8.46177	-1.17842	0.678477	-1.73686	0.0824117	0.424744
ENSG00000256152-AC027290.1	9.96892	1.18526	0.683322	1.73455	0.08282	0.426494
[truncated: 56,742 more rows]

## Sheet: SUPT1_DE_DEXvsDMSO_24h
Differential expression after 24h dexamethasone treatment compared to DMSO in SUP-T1 cell line
	baseMean	log2FoldChange	lfcSE	stat	pvalue	padj
ENSG00000168685-IL7R	691.422	2.43222	0.103661	23.4633	9.68e-122	9.23e-118
ENSG00000096060-FKBP5	1005.82	1.95088	0.0921804	21.1637	2.06e-99	9.84e-96
ENSG00000133639-BTG1	281.927	3.45125	0.165477	20.8564	1.33e-96	4.24e-93
ENSG00000236824-BCYRN1	804.312	-1.90185	0.101923	-18.6598	1.05e-77	2.51e-74
ENSG00000157514-TSC22D3	241.788	7.58994	0.527585	14.3862	6.32e-47	1.21e-43
ENSG00000187514-PTMA	2862.55	-0.916578	0.0650073	-14.0996	3.82e-45	6.07e-42
ENSG00000115053-NCL	1635.83	-0.936264	0.072718	-12.8753	6.2e-38	7.42e-35
ENSG00000172005-MAL	1375.04	0.989788	0.0768768	12.875	6.22e-38	7.42e-35
ENSG00000196230-TUBB	2406.99	-0.884618	0.0734714	-12.0403	2.18e-33	2.31e-30
ENSG00000140319-SRP14	1550.2	0.911671	0.0803024	11.353	7.17e-30	6.84e-27
ENSG00000131747-TOP2A	1469.49	-0.852318	0.0779802	-10.9299	8.29e-28	7.19e-25
ENSG00000123836-PFKFB2	63.9501	3.71582	0.344901	10.7736	4.59e-27	3.65e-24
ENSG00000099901-RANBP1	420.608	-1.16596	0.109722	-10.6265	2.24e-26	1.65e-23
ENSG00000171848-RRM2	201.327	-1.70683	0.161996	-10.5363	5.88e-26	4.01e-23
ENSG00000080824-HSP90AA1	3956.39	-0.666973	0.0652058	-10.2287	1.47e-24	9.38e-22
ENSG00000101849-TBL1X	395.078	1.18208	0.115923	10.1971	2.04e-24	1.22e-21
ENSG00000228716-DHFR	338.189	-1.25012	0.12296	-10.1669	2.79e-24	1.56e-21
ENSG00000168209-DDIT4	81.2998	2.60058	0.25659	10.1352	3.86e-24	1.94e-21
ENSG00000258017-AC011603.2	1625.69	-0.83904	0.0827785	-10.136	3.83e-24	1.94e-21
ENSG00000123416-TUBA1B	1631.18	-0.83877	0.082871	-10.1214	4.44e-24	2.12e-21
ENSG00000214182-PTMAP5	917.994	-1.00904	0.101058	-9.98476	1.78e-23	8.08e-21
ENSG00000269926-DDIT4-AS1	75.9405	2.63274	0.264341	9.95965	2.29e-23	9.93e-21
ENSG00000070081-NUCB2	764.333	-0.88534	0.089245	-9.92034	3.4e-23	1.41e-20
ENSG00000104081-BMF	52.3175	4.30637	0.435808	9.88133	5.02e-23	1.99e-20
ENSG00000069275-NUCKS1	1602.91	-0.739535	0.0754625	-9.80003	1.13e-22	4.3e-20
ENSG00000152518-ZFP36L2	218.332	1.43302	0.146326	9.79334	1.2e-22	4.41e-20
ENSG00000164032-H2AFZ	1113.61	-0.82743	0.0847231	-9.76629	1.57e-22	5.55e-20
ENSG00000170515-PA2G4	750.726	-0.875043	0.0910334	-9.61233	7.09e-22	2.42e-19
ENSG00000119969-HELLS	363.857	-1.15237	0.119989	-9.60401	7.69e-22	2.53e-19
ENSG00000096384-HSP90AB1	2714.28	-0.651552	0.0691012	-9.42896	4.14e-21	1.32e-18
ENSG00000176890-TYMS	326.599	-1.29406	0.138399	-9.35015	8.75e-21	2.69e-18
ENSG00000075624-ACTB	1647.89	-0.690447	0.073949	-9.3368	9.93e-21	2.96e-18
ENSG00000144381-HSPD1	584.816	-0.978369	0.105749	-9.25177	2.21e-20	6.38e-18
ENSG00000101361-NOP56	570.223	-0.95024	0.103935	-9.14262	6.1e-20	1.66e-17
ENSG00000185432-METTL7A	73.8082	2.47787	0.270984	9.14397	6.02e-20	1.66e-17
ENSG00000181163-NPM1	2025.15	-0.628237	0.0689693	-9.10894	8.32e-20	2.21e-17
ENSG00000156802-ATAD2	320.604	-1.12994	0.124207	-9.09724	9.27e-20	2.39e-17
ENSG00000108106-UBE2S	339.261	-1.12889	0.125942	-8.96355	3.14e-19	7.89e-17
ENSG00000161835-GRASP	45.4346	4.97648	0.556781	8.93795	3.96e-19	9.7e-17
ENSG00000084070-SMAP2	90.4989	2.08753	0.237503	8.78947	1.5e-18	3.58e-16
ENSG00000187837-HIST1H1C	311.15	-1.16151	0.132522	-8.76464	1.87e-18	4.36e-16
ENSG00000165732-DDX21	673.296	-0.812958	0.0933915	-8.70484	3.18e-18	7.23e-16
ENSG00000142864-SERBP1	803.411	-0.760854	0.0874506	-8.70038	3.31e-18	7.34e-16
ENSG00000281852-LINC00891	40.3916	4.78343	0.556625	8.59363	8.43e-18	1.83e-15
ENSG00000145220-LYAR	160.871	-1.50624	0.177037	-8.50809	1.77e-17	3.75e-15
ENSG00000108424-KPNB1	963.037	-0.756484	0.0893399	-8.46748	2.51e-17	5.2e-15
ENSG00000130816-DNMT1	691.086	-0.794849	0.0939845	-8.45724	2.74e-17	5.56e-15
ENSG00000101057-MYBL2	151.029	-1.51034	0.179255	-8.42563	3.59e-17	7.13e-15
ENSG00000132199-ENOSF1	349.222	-1.15604	0.137514	-8.4067	4.22e-17	8.21e-15
ENSG00000197744-PTMAP2	527.062	-0.978382	0.117055	-8.35833	6.36e-17	1.21e-14
ENSG00000058453-CROCC	36.3952	4.82033	0.586133	8.22395	1.97e-16	3.68e-14
ENSG00000148773-MKI67	328.047	-0.989098	0.120308	-8.2214	2.01e-16	3.69e-14
ENSG00000104880-ARHGEF18	98.0291	1.81358	0.220751	8.2155	2.11e-16	3.8e-14
ENSG00000167325-RRM1	366.117	-0.982251	0.121595	-8.07806	6.58e-16	1.16e-13
ENSG00000268861-AC008878.3	98.0611	1.80003	0.222934	8.07426	6.79e-16	1.18e-13
ENSG00000091409-ITGA6	39.2189	3.30447	0.409518	8.06918	7.08e-16	1.21e-13
ENSG00000124795-DEK	701.716	-0.760191	0.0942399	-8.06655	7.23e-16	1.21e-13
ENSG00000070814-TCOF1	254.213	-1.10772	0.137588	-8.05103	8.21e-16	1.35e-13
ENSG00000167658-EEF2	1990.61	0.569642	0.0710594	8.01641	1.09e-15	1.76e-13
ENSG00000141556-TBCD	503.713	0.883115	0.110295	8.00687	1.18e-15	1.87e-13
ENSG00000198830-HMGN2	988.248	-0.666512	0.0833047	-8.00088	1.24e-15	1.93e-13
ENSG00000092853-CLSPN	167.728	-1.36594	0.172213	-7.93166	2.16e-15	3.33e-13
ENSG00000166803-PCLAF	265.629	-1.08635	0.137045	-7.92695	2.25e-15	3.4e-13
ENSG00000162607-USP1	257.037	-1.08033	0.136516	-7.91354	2.5e-15	3.73e-13
ENSG00000164104-HMGB2	347.132	-1.19704	0.151329	-7.91016	2.57e-15	3.77e-13
ENSG00000113810-SMC4	628.192	-0.760585	0.0971681	-7.82752	4.98e-15	7.19e-13
ENSG00000065357-DGKA	103.091	1.63076	0.209806	7.77271	7.68e-15	1.09e-12
ENSG00000117724-CENPF	657.313	-0.720099	0.0943496	-7.63225	2.31e-14	3.24e-12
ENSG00000156804-FBXO32	31.9205	3.56314	0.470273	7.57676	3.54e-14	4.9e-12
ENSG00000100316-RPL3	1062.76	0.630939	0.0834046	7.5648	3.88e-14	5.3e-12
ENSG00000136824-SMC2	188.044	-1.14846	0.15186	-7.56266	3.95e-14	5.31e-12
ENSG00000106462-EZH2	336.8	-0.894226	0.118273	-7.56072	4.01e-14	5.31e-12
ENSG00000128951-DUT	334.377	-1.06993	0.143922	-7.43414	1.05e-13	1.38e-11
ENSG00000172183-ISG20	34.7969	5.76244	0.778164	7.40518	1.31e-13	1.69e-11
ENSG00000109971-HSPA8	844.933	-0.636343	0.0861067	-7.39017	1.47e-13	1.87e-11
ENSG00000108405-P2RX1	28.1887	4.43867	0.60209	7.3721	1.68e-13	2.11e-11
ENSG00000103056-SMPD3	300.101	0.900321	0.122814	7.33078	2.29e-13	2.84e-11
ENSG00000088325-TPX2	223.544	-1.08552	0.14832	-7.31876	2.5e-13	3.06e-11
ENSG00000133226-SRRM1	928.666	-0.680403	0.0930098	-7.31539	2.57e-13	3.1e-11
ENSG00000131153-GINS2	143.169	-1.28587	0.176471	-7.28656	3.18e-13	3.79e-11
ENSG00000164292-RHOBTB3	117.028	1.41252	0.194063	7.2787	3.37e-13	3.97e-11
ENSG00000179218-CALR	273.634	-0.9247	0.1271	-7.27538	3.45e-13	4.02e-11
ENSG00000163508-EOMES	31.223	3.74891	0.51779	7.24021	4.48e-13	5.15e-11
ENSG00000132646-PCNA	212.304	-1.21906	0.168609	-7.23008	4.83e-13	5.48e-11
ENSG00000130826-DKC1	421.226	-0.80893	0.112263	-7.20564	5.78e-13	6.49e-11
ENSG00000154127-UBASH3B	56.9041	2.03941	0.284597	7.16597	7.72e-13	8.57e-11
ENSG00000182957-SPATA13	61.0013	1.93688	0.271078	7.14507	8.99e-13	9.87e-11
ENSG00000074800-ENO1	1440.35	-0.591642	0.0831628	-7.11426	1.13e-12	1.22e-10
ENSG00000174500-GCSAM	30.0324	3.4329	0.483291	7.10319	1.22e-12	1.31e-10
ENSG00000176208-ATAD5	146.226	-1.2001	0.170007	-7.05912	1.68e-12	1.78e-10
ENSG00000143476-DTL	87.124	-1.58596	0.225117	-7.04505	1.85e-12	1.94e-10
ENSG00000224411-HSP90AA2P	284.521	-0.9115	0.129578	-7.03436	2e-12	2.08e-10
ENSG00000112118-MCM3	316.913	-1.00716	0.143321	-7.02733	2.11e-12	2.16e-10
ENSG00000186591-UBE2H	123.776	1.28937	0.183589	7.02309	2.17e-12	2.2e-10
ENSG00000142541-RPL13A	1800.2	0.586206	0.0836742	7.00581	2.46e-12	2.47e-10
ENSG00000119335-SET	1264.87	-0.546721	0.078162	-6.99471	2.66e-12	2.64e-10
ENSG00000285600-AC023593.1	194.924	-1.19086	0.170542	-6.98277	2.89e-12	2.85e-10
ENSG00000197081-IGF2R	204.662	1.04124	0.149335	6.97249	3.11e-12	3.03e-10
ENSG00000137309-HMGA1	452.932	-0.733362	0.1056	-6.94471	3.79e-12	3.65e-10
ENSG00000167088-SNRPD1	571.891	-0.805863	0.116062	-6.9434	3.83e-12	3.65e-10
ENSG00000267458-AC092069.1	229.623	-0.950601	0.137224	-6.92739	4.29e-12	4.05e-10
ENSG00000073111-MCM2	195.823	-1.18307	0.171005	-6.91835	4.57e-12	4.27e-10
ENSG00000109881-CCDC34	230.769	-0.964727	0.139563	-6.91248	4.76e-12	4.41e-10
ENSG00000104738-MCM4	122.471	-1.32481	0.191893	-6.90392	5.06e-12	4.64e-10
ENSG00000205542-TMSB4X	2339.08	-0.470475	0.0681987	-6.89859	5.25e-12	4.77e-10
ENSG00000109685-NSD2	256.074	-0.897575	0.13133	-6.83452	8.23e-12	7.41e-10
ENSG00000143970-ASXL2	98.404	1.42443	0.208708	6.82497	8.79e-12	7.84e-10
ENSG00000146918-NCAPG2	98.472	-1.44848	0.212679	-6.81065	9.72e-12	8.58e-10
ENSG00000066279-ASPM	313.778	-0.828495	0.121798	-6.80223	1.03e-11	9.02e-10
ENSG00000179271-GADD45GIP1	304.529	-0.963062	0.142531	-6.75685	1.41e-11	1.22e-09
ENSG00000080345-RIF1	389.444	-0.762192	0.112962	-6.74731	1.51e-11	1.29e-09
ENSG00000257411-AC034102.2	223.684	-0.998544	0.148151	-6.74005	1.58e-11	1.35e-09
ENSG00000164045-CDC25A	75.4046	-1.63272	0.242835	-6.72358	1.77e-11	1.5e-09
ENSG00000106018-VIPR2	173.271	1.06854	0.159654	6.69283	2.19e-11	1.83e-09
ENSG00000141524-TMC6	34.3886	2.79855	0.422962	6.61657	3.68e-11	3.02e-09
ENSG00000173207-CKS1B	184.791	-1.03425	0.156307	-6.61679	3.67e-11	3.02e-09
ENSG00000167553-TUBA1C	269.733	-0.86632	0.131202	-6.60293	4.03e-11	3.29e-09
ENSG00000013810-TACC3	161.436	-1.07758	0.163533	-6.58934	4.42e-11	3.57e-09
ENSG00000143228-NUF2	116.19	-1.27855	0.194279	-6.58102	4.67e-11	3.73e-09
ENSG00000189403-HMGB1	1801.48	-0.490322	0.0745116	-6.58048	4.69e-11	3.73e-09
ENSG00000072274-TFRC	216.403	-0.935388	0.143143	-6.53465	6.38e-11	5.03e-09
ENSG00000258232-AC125611.3	267.418	-0.862156	0.132204	-6.5214	6.97e-11	5.45e-09
ENSG00000143669-LYST	187.692	1.0059	0.154595	6.50667	7.68e-11	5.91e-09
ENSG00000197061-HIST1H4C	239.228	-0.947339	0.145595	-6.50666	7.68e-11	5.91e-09
ENSG00000009954-BAZ1B	321.967	-0.808335	0.124815	-6.47629	9.4e-11	7.18e-09
ENSG00000213977-TAX1BP3	43.3653	2.08244	0.3218	6.47121	9.72e-11	7.36e-09
ENSG00000164754-RAD21	523.461	-0.645515	0.0999274	-6.45984	1.05e-10	7.86e-09
ENSG00000186654-PRR5	47.8404	2.02157	0.31299	6.45891	1.05e-10	7.86e-09
ENSG00000088247-KHSRP	751.897	-0.706529	0.109453	-6.45512	1.08e-10	7.94e-09
ENSG00000167895-TMC8	32.7349	2.66598	0.412984	6.45541	1.08e-10	7.94e-09
ENSG00000100764-PSMC1	367.49	-0.743405	0.11549	-6.43695	1.22e-10	8.88e-09
ENSG00000106415-GLCCI1	199.72	0.993553	0.15488	6.41497	1.41e-10	1.02e-08
ENSG00000142534-RPS11	1790.86	0.44718	0.0699225	6.39537	1.6e-10	1.15e-08
ENSG00000134333-LDHA	462.159	-0.685123	0.107154	-6.39379	1.62e-10	1.15e-08
ENSG00000175711-B3GNTL1	381.058	0.805614	0.126049	6.39127	1.65e-10	1.16e-08
ENSG00000149136-SSRP1	516.174	-0.682229	0.10743	-6.35048	2.15e-10	1.51e-08
ENSG00000123104-ITPR2	364.029	0.726674	0.114476	6.34784	2.18e-10	1.52e-08
ENSG00000094804-CDC6	70.1601	-1.63831	0.258382	-6.34065	2.29e-10	1.58e-08
ENSG00000136938-ANP32B	441.502	-0.666657	0.105316	-6.33006	2.45e-10	1.68e-08
ENSG00000110880-CORO1C	142.175	1.06509	0.169378	6.28822	3.21e-10	2.19e-08
ENSG00000127564-PKMYT1	92.9087	-1.39112	0.222103	-6.26339	3.77e-10	2.55e-08
ENSG00000147162-OGT	169.826	1.03295	0.165053	6.25832	3.89e-10	2.61e-08
ENSG00000162073-PAQR4	91.3958	-1.3998	0.224082	-6.24682	4.19e-10	2.8e-08
ENSG00000048740-CELF2	158.12	1.07598	0.17242	6.24046	4.36e-10	2.89e-08
ENSG00000167670-CHAF1A	142.701	-1.07525	0.172392	-6.23723	4.45e-10	2.93e-08
ENSG00000198771-RCSD1	90.1922	1.44023	0.231005	6.23462	4.53e-10	2.96e-08
ENSG00000145386-CCNA2	204.077	-0.923025	0.14817	-6.22952	4.68e-10	3.04e-08
ENSG00000065328-MCM10	82.713	-1.47026	0.23613	-6.2265	4.77e-10	3.08e-08
ENSG00000140470-ADAMTS17	116.868	1.204	0.193577	6.21975	4.98e-10	3.19e-08
ENSG00000183684-ALYREF	186.018	-1.01865	0.164032	-6.21009	5.3e-10	3.37e-08
ENSG00000166851-PLK1	122.096	-1.18741	0.19239	-6.17189	6.75e-10	4.26e-08
ENSG00000121966-CXCR4	347.613	0.726899	0.118057	6.15717	7.41e-10	4.65e-08
ENSG00000172995-ARPP21	158.64	1.01369	0.164708	6.1545	7.53e-10	4.7e-08
ENSG00000089685-BIRC5	141.871	-1.06098	0.172584	-6.14763	7.87e-10	4.87e-08
ENSG00000109805-NCAPG	154.461	-1.05159	0.171384	-6.13587	8.47e-10	5.21e-08
ENSG00000074695-LMAN1	317.912	-0.732393	0.119388	-6.13458	8.54e-10	5.22e-08
ENSG00000113368-LMNB1	176.592	-1.08271	0.176983	-6.1176	9.5e-10	5.77e-08
ENSG00000135821-GLUL	104.62	1.22706	0.200817	6.11034	9.94e-10	6e-08
ENSG00000080644-CHRNA3	56.4534	1.68092	0.275789	6.09494	1.09e-09	6.56e-08
ENSG00000167513-CDT1	96.6256	-1.30471	0.214088	-6.09426	1.1e-09	6.56e-08
ENSG00000122565-CBX3	1423.01	-0.532802	0.08779	-6.06906	1.29e-09	7.63e-08
ENSG00000157388-CACNA1D	30.7695	2.49088	0.410521	6.06762	1.3e-09	7.65e-08
ENSG00000118058-KMT2A	634.973	-0.583642	0.0963348	-6.05847	1.37e-09	8e-08
ENSG00000179262-RAD23A	216.464	-1.07667	0.177699	-6.05893	1.37e-09	8e-08
ENSG00000011304-PTBP1	437.753	-0.646319	0.107483	-6.01321	1.82e-09	1.05e-07
ENSG00000093009-CDC45	71.1229	-1.47515	0.24618	-5.99217	2.07e-09	1.19e-07
ENSG00000100906-NFKBIA	106.129	1.21268	0.202881	5.97729	2.27e-09	1.3e-07
ENSG00000126457-PRMT1	249.961	-0.881002	0.147551	-5.97084	2.36e-09	1.34e-07
ENSG00000228519-AC097263.1	105.783	-1.27749	0.214205	-5.96387	2.46e-09	1.39e-07
ENSG00000162434-JAK1	206.375	0.998785	0.167788	5.95266	2.64e-09	1.48e-07
ENSG00000055044-NOP58	359.155	-0.69251	0.116396	-5.94963	2.69e-09	1.5e-07
ENSG00000198755-RPL10A	1348.05	0.452895	0.0762266	5.94142	2.83e-09	1.57e-07
ENSG00000163808-KIF15	103.737	-1.18621	0.19978	-5.93759	2.89e-09	1.6e-07
ENSG00000083457-ITGAE	93.8217	1.23163	0.207468	5.93648	2.91e-09	1.6e-07
ENSG00000100351-GRAP2	23.6775	2.87852	0.485645	5.92721	3.08e-09	1.68e-07
ENSG00000083454-P2RX5	25.8925	7.26312	1.22633	5.92265	3.17e-09	1.72e-07
ENSG00000276043-UHRF1	157.293	-1.02012	0.172292	-5.92085	3.2e-09	1.73e-07
ENSG00000092201-SUPT16H	503.63	-0.602089	0.10177	-5.91616	3.3e-09	1.76e-07
ENSG00000187051-RPS19BP1	134.672	1.04315	0.176302	5.91684	3.28e-09	1.76e-07
ENSG00000102606-ARHGEF7	136.213	1.05582	0.178653	5.90987	3.42e-09	1.82e-07
ENSG00000114554-PLXNA1	39.7869	2.06252	0.349861	5.89526	3.74e-09	1.97e-07
ENSG00000150753-CCT5	376.39	-0.657032	0.111517	-5.89176	3.82e-09	2e-07
ENSG00000128050-PAICS	256.171	-0.8149	0.138443	-5.88617	3.95e-09	2.06e-07
ENSG00000127589-TUBBP1	201.698	-0.855762	0.145499	-5.88156	4.06e-09	2.11e-07
ENSG00000125835-SNRPB	308.476	-0.75406	0.128276	-5.87841	4.14e-09	2.14e-07
ENSG00000165272-AQP3	77.1055	1.80003	0.306279	5.8771	4.18e-09	2.14e-07
ENSG00000163803-PLB1	18.0951	4.18417	0.716476	5.83993	5.22e-09	2.66e-07
ENSG00000145390-USP53	31.0865	2.27161	0.389283	5.83536	5.37e-09	2.72e-07
ENSG00000232573-RPL3P4	486.183	0.649057	0.111377	5.82755	5.62e-09	2.84e-07
ENSG00000132780-NASP	566.467	-0.678901	0.116533	-5.82582	5.68e-09	2.85e-07
ENSG00000273344-PAXIP1-AS1	65.817	1.45574	0.249899	5.82532	5.7e-09	2.85e-07
ENSG00000119705-SLIRP	529.517	-0.631612	0.10905	-5.79193	6.96e-09	3.46e-07
ENSG00000059728-MXD1	65.9048	1.51583	0.262055	5.7844	7.28e-09	3.6e-07
ENSG00000138182-KIF20B	196.955	-0.868181	0.150918	-5.75267	8.78e-09	4.32e-07
ENSG00000198901-PRC1	149.413	-1.00574	0.175007	-5.74683	9.09e-09	4.45e-07
ENSG00000115484-CCT4	308.565	-0.697255	0.12138	-5.74438	9.23e-09	4.49e-07
ENSG00000139618-BRCA2	131.665	-1.0768	0.187842	-5.73249	9.9e-09	4.79e-07
ENSG00000136982-DSCC1	39.9711	-2.02514	0.355282	-5.70009	1.2e-08	5.77e-07
ENSG00000108055-SMC3	427.371	-0.68051	0.119995	-5.67114	1.42e-08	6.8e-07
ENSG00000100354-TNRC6B	225.214	0.873003	0.153966	5.67012	1.43e-08	6.81e-07
ENSG00000169926-KLF13	263.606	0.85624	0.15119	5.66334	1.48e-08	7.05e-07
ENSG00000170312-CDK1	93.263	-1.27047	0.224841	-5.65053	1.6e-08	7.56e-07
ENSG00000172115-CYCS	345.642	-0.680085	0.120423	-5.64746	1.63e-08	7.65e-07
ENSG00000169607-CKAP2L	96.4575	-1.16902	0.207194	-5.64214	1.68e-08	7.86e-07
ENSG00000144136-SLC20A1	140.349	-1.00115	0.17762	-5.63647	1.74e-08	8.08e-07
ENSG00000071082-RPL31	2861.03	0.44266	0.0785692	5.63402	1.76e-08	8.15e-07
ENSG00000116161-CACYBP	254.385	-0.814576	0.145372	-5.60337	2.1e-08	9.69e-07
ENSG00000106153-CHCHD2	1408.29	-0.517369	0.0925234	-5.59176	2.25e-08	1.02e-06
ENSG00000145592-RPL37	3863.4	0.438691	0.0784612	5.59118	2.26e-08	1.02e-06
ENSG00000145715-RASA1	102.116	1.16265	0.207891	5.59258	2.24e-08	1.02e-06
ENSG00000159388-BTG2	28.3558	2.47906	0.44433	5.57931	2.41e-08	1.09e-06
ENSG00000132967-HMGB1P5	1187.95	-0.476795	0.0855577	-5.57279	2.51e-08	1.13e-06
ENSG00000198176-TFDP1	179.637	-0.875459	0.157153	-5.57073	2.54e-08	1.14e-06
ENSG00000139116-KIF21A	136.256	0.960289	0.172434	5.56901	2.56e-08	1.14e-06
ENSG00000144468-RHBDD1	76.147	1.28525	0.231214	5.55869	2.72e-08	1.21e-06
ENSG00000135624-CCT7	418.512	-0.595122	0.107408	-5.54077	3.01e-08	1.33e-06
ENSG00000174718-KIAA1551	257.846	0.815288	0.147314	5.53434	3.12e-08	1.37e-06
ENSG00000113580-NR3C1	155.9	0.905796	0.163716	5.53272	3.15e-08	1.38e-06
ENSG00000151725-CENPU	127.429	-1.06926	0.193727	-5.51939	3.4e-08	1.48e-06
ENSG00000133112-TPT1	3323.17	0.398777	0.0722829	5.5169	3.45e-08	1.5e-06
ENSG00000072501-SMC1A	344.904	-0.63691	0.115518	-5.51353	3.52e-08	1.51e-06
ENSG00000167552-TUBA1A	441.015	-0.654263	0.118656	-5.51397	3.51e-08	1.51e-06
ENSG00000179958-DCTPP1	101.804	-1.16855	0.212512	-5.49874	3.83e-08	1.64e-06
ENSG00000123636-BAZ2B	177.334	0.883007	0.160703	5.49463	3.92e-08	1.67e-06
ENSG00000170776-AKAP13	118.927	1.05493	0.1922	5.48871	4.05e-08	1.72e-06
ENSG00000196584-XRCC2	47.6115	-1.72428	0.314293	-5.48623	4.11e-08	1.73e-06
ENSG00000138778-CENPE	228.499	-0.768462	0.140213	-5.48068	4.24e-08	1.78e-06
ENSG00000236498-AC107081.2	248.29	-0.730717	0.133342	-5.48003	4.25e-08	1.78e-06
ENSG00000089289-IGBP1	118.249	1.05306	0.192478	5.47104	4.47e-08	1.86e-06
ENSG00000198712-MT-CO2	14001.9	0.348112	0.063628	5.47105	4.47e-08	1.86e-06
ENSG00000069849-ATP1B3	277.547	-0.731241	0.133721	-5.4684	4.54e-08	1.88e-06
ENSG00000269968-AC006064.4	2000.77	-0.395957	0.0724719	-5.4636	4.67e-08	1.92e-06
ENSG00000179115-FARSA	113.646	-1.14325	0.209312	-5.46194	4.71e-08	1.93e-06
ENSG00000197728-RPS26	367.862	-0.674288	0.123541	-5.45801	4.81e-08	1.96e-06
ENSG00000189057-FAM111B	53.4898	-1.5558	0.285366	-5.45194	4.98e-08	2.02e-06
ENSG00000124766-SOX4	1275.35	0.414283	0.0761824	5.43803	5.39e-08	2.18e-06
ENSG00000105486-LIG1	52.539	-1.52513	0.280893	-5.42958	5.65e-08	2.27e-06
ENSG00000157212-PAXIP1	96.509	1.11676	0.205696	5.42917	5.66e-08	2.27e-06
ENSG00000133119-RFC3	87.7132	-1.19266	0.219969	-5.42195	5.9e-08	2.35e-06
ENSG00000257542-OR7E47P	19.1612	2.96046	0.546043	5.42166	5.9e-08	2.35e-06
ENSG00000197451-HNRNPAB	569.985	-0.735302	0.135779	-5.41543	6.11e-08	2.42e-06
ENSG00000100297-MCM5	145.713	-0.933995	0.172544	-5.41309	6.19e-08	2.44e-06
ENSG00000156508-EEF1A1	7823.57	0.386638	0.0714616	5.41043	6.29e-08	2.47e-06
ENSG00000111640-GAPDH	2027.03	-0.395522	0.0731606	-5.40622	6.44e-08	2.52e-06
ENSG00000153944-MSI2	300.537	0.694667	0.128574	5.40288	6.56e-08	2.55e-06
ENSG00000035928-RFC1	345.964	-0.626696	0.116101	-5.39785	6.74e-08	2.62e-06
ENSG00000134690-CDCA8	132.537	-1.03095	0.191519	-5.383	7.33e-08	2.83e-06
ENSG00000271980-AC012640.4	297.127	-0.656801	0.122106	-5.37896	7.49e-08	2.88e-06
ENSG00000264558-AC015674.1	173.79	-0.903486	0.168544	-5.36052	8.3e-08	3.18e-06
ENSG00000198826-ARHGAP11A	86.7707	-1.21731	0.227464	-5.35166	8.71e-08	3.33e-06
ENSG00000092621-PHGDH	114.603	-1.01957	0.19083	-5.34282	9.15e-08	3.48e-06
ENSG00000231419-LINC00689	79.3078	1.27055	0.238046	5.3374	9.43e-08	3.57e-06
ENSG00000105202-FBL	712.404	-0.493038	0.0925426	-5.32768	9.95e-08	3.75e-06
ENSG00000175866-BAIAP2	122.621	0.998443	0.187676	5.32003	1.04e-07	3.9e-06
ENSG00000166508-MCM7	296.289	-0.688985	0.129828	-5.3069	1.12e-07	4.17e-06
ENSG00000117395-EBNA1BP2	206.059	-0.762672	0.144013	-5.29585	1.18e-07	4.42e-06
ENSG00000101868-POLA1	76.2824	-1.2313	0.232657	-5.29234	1.21e-07	4.48e-06
ENSG00000225921-NOL7	222.219	-0.752736	0.142241	-5.29198	1.21e-07	4.48e-06
ENSG00000223745-CCDC18-AS1	50.5408	1.73236	0.327944	5.28249	1.27e-07	4.7e-06
ENSG00000166598-HSP90B1	472.085	-0.606418	0.114842	-5.28046	1.29e-07	4.73e-06
ENSG00000249992-TMEM158	91.7302	-1.10866	0.210242	-5.27324	1.34e-07	4.9e-06
ENSG00000173218-VANGL1	126.774	-0.959118	0.181986	-5.27028	1.36e-07	4.96e-06
ENSG00000213639-PPP1CB	228.507	0.80052	0.152389	5.25312	1.5e-07	5.43e-06
ENSG00000102172-SMS	182.077	-0.800563	0.152434	-5.25187	1.51e-07	5.44e-06
ENSG00000104419-NDRG1	24.565	2.34938	0.44739	5.2513	1.51e-07	5.44e-06
ENSG00000142945-KIF2C	66.5071	-1.32616	0.252774	-5.24644	1.55e-07	5.56e-06
ENSG00000100632-ERH	427.678	-0.576597	0.110459	-5.22001	1.79e-07	6.39e-06
ENSG00000184990-SIVA1	409.614	-0.629704	0.120647	-5.2194	1.8e-07	6.39e-06
ENSG00000116062-MSH6	207.853	-0.768738	0.147386	-5.21583	1.83e-07	6.49e-06
ENSG00000061273-HDAC7	258.063	0.884991	0.169839	5.21076	1.88e-07	6.65e-06
ENSG00000091651-ORC6	80.9187	-1.22718	0.235697	-5.20661	1.92e-07	6.77e-06
ENSG00000160818-GPATCH4	239.447	-0.720647	0.138444	-5.20533	1.94e-07	6.79e-06
ENSG00000188612-SUMO2	370.971	-0.622104	0.119528	-5.20469	1.94e-07	6.79e-06
ENSG00000137804-NUSAP1	224.993	-0.742657	0.143527	-5.17435	2.29e-07	7.96e-06
ENSG00000123737-EXOSC9	235.034	-0.721296	0.140225	-5.14384	2.69e-07	9.31e-06
ENSG00000198355-PIM3	104.674	-1.05239	0.204592	-5.14384	2.69e-07	9.31e-06
ENSG00000075218-GTSE1	91.3188	-1.1302	0.219759	-5.14292	2.71e-07	9.32e-06
ENSG00000188229-TUBB4B	97.5221	-1.06385	0.207888	-5.1174	3.1e-07	1.06e-05
ENSG00000140600-SH3GL3	88.2149	1.12859	0.220992	5.10693	3.27e-07	1.12e-05
ENSG00000166272-WBP1L	65.2927	1.29051	0.253264	5.0955	3.48e-07	1.19e-05
ENSG00000152253-SPC25	58.852	-1.42395	0.279568	-5.09339	3.52e-07	1.19e-05
ENSG00000284378-MIR1244-1	490.887	-0.568646	0.111922	-5.08074	3.76e-07	1.27e-05
ENSG00000116830-TTF2	112.532	-1.00751	0.198745	-5.06938	3.99e-07	1.35e-05
ENSG00000123374-CDK2	155.128	-0.858946	0.16965	-5.06304	4.13e-07	1.39e-05
ENSG00000064886-CHI3L2	140.971	-0.886815	0.175318	-5.05831	4.23e-07	1.42e-05
ENSG00000108671-PSMD11	522.041	-0.568718	0.112537	-5.05359	4.34e-07	1.44e-05
ENSG00000165480-SKA3	41.0294	-1.64997	0.326474	-5.05393	4.33e-07	1.44e-05
ENSG00000106554-CHCHD3	152.494	-0.849595	0.168563	-5.04023	4.65e-07	1.54e-05
ENSG00000122566-HNRNPA2B1	1292.4	-0.470748	0.0935425	-5.03245	4.84e-07	1.6e-05
ENSG00000285920-AC087721.2	194.623	-0.763403	0.151703	-5.03224	4.85e-07	1.6e-05
ENSG00000114796-KLHL24	19.9964	2.50418	0.498424	5.0242	5.06e-07	1.66e-05
ENSG00000213598-AL049873.1	500.972	0.553361	0.11035	5.01458	5.31e-07	1.74e-05
ENSG00000184640-40057	180.513	0.801711	0.160408	4.99796	5.79e-07	1.89e-05
ENSG00000168439-STIP1	85.5473	-1.13662	0.227604	-4.99386	5.92e-07	1.92e-05
ENSG00000067225-PKM	322.648	-0.670884	0.134375	-4.99261	5.96e-07	1.93e-05
ENSG00000120437-ACAT2	314.03	-0.621625	0.1246	-4.98896	6.07e-07	1.95e-05
ENSG00000241666-AL031733.2	39.7541	1.65663	0.332052	4.98907	6.07e-07	1.95e-05
ENSG00000107581-EIF3A	561.124	-0.480434	0.0964503	-4.98116	6.32e-07	2.02e-05
ENSG00000269292-AC093503.2	381.137	-0.564618	0.113359	-4.98079	6.33e-07	2.02e-05
ENSG00000175390-EIF3F	276.103	0.627054	0.12593	4.9794	6.38e-07	2.03e-05
ENSG00000166197-NOLC1	217.415	-0.71576	0.143833	-4.97633	6.48e-07	2.05e-05
ENSG00000089048-ESF1	458.061	-0.52502	0.105536	-4.97481	6.53e-07	2.06e-05
ENSG00000125089-SH3TC1	192.722	0.753434	0.151469	4.9742	6.55e-07	2.06e-05
ENSG00000100749-VRK1	135.898	-0.908054	0.182672	-4.97096	6.66e-07	2.09e-05
ENSG00000125977-EIF2S2	632.871	-0.460164	0.0925982	-4.96947	6.71e-07	2.1e-05
ENSG00000169679-BUB1	50.9943	-1.47466	0.297171	-4.96233	6.97e-07	2.17e-05
ENSG00000172179-PRL	66.9203	1.31817	0.265666	4.96176	6.99e-07	2.17e-05
ENSG00000143933-CALM2	636.559	-0.528361	0.106527	-4.95986	7.05e-07	2.19e-05
ENSG00000007968-E2F2	101.697	-1.02664	0.207298	-4.9525	7.33e-07	2.26e-05
ENSG00000117450-PRDX1	765.073	-0.451687	0.091471	-4.93803	7.89e-07	2.43e-05
ENSG00000167526-RPL13	2315.13	0.323421	0.065513	4.93675	7.94e-07	2.44e-05
ENSG00000144554-FANCD2	130.508	-0.909133	0.184653	-4.92346	8.5e-07	2.6e-05
ENSG00000178567-EPM2AIP1	111.907	0.976176	0.198527	4.91709	8.78e-07	2.68e-05
ENSG00000115541-HSPE1	432.793	-0.555909	0.113239	-4.90918	9.15e-07	2.78e-05
ENSG00000155463-OXA1L	138.348	0.848404	0.17326	4.89672	9.75e-07	2.95e-05
ENSG00000119801-YPEL5	20.992	2.34974	0.48028	4.89243	9.96e-07	3.01e-05
ENSG00000231167-YBX1P2	95.341	-1.09783	0.225332	-4.87205	1.1e-06	3.32e-05
ENSG00000134802-SLC43A3	73.9875	-1.20267	0.247442	-4.8604	1.17e-06	3.52e-05
ENSG00000180198-RCC1	118.746	-0.908233	0.186921	-4.85891	1.18e-06	3.53e-05
ENSG00000155926-SLA	140.727	0.842995	0.173765	4.85135	1.23e-06	3.66e-05
ENSG00000198157-HMGN5	302.859	-0.622485	0.128703	-4.83659	1.32e-06	3.93e-05
ENSG00000078687-TNRC6C	253.122	0.686543	0.142115	4.83092	1.36e-06	4.03e-05
ENSG00000284946-AC068831.7	119.716	-0.904841	0.187377	-4.82898	1.37e-06	4.05e-05
ENSG00000116649-SRM	188.92	-0.719967	0.149159	-4.82685	1.39e-06	4.09e-05
ENSG00000085117-CD82	72.4354	-1.19815	0.248366	-4.82413	1.41e-06	4.13e-05
ENSG00000178999-AURKB	105.13	-1.04169	0.216165	-4.81897	1.44e-06	4.22e-05
ENSG00000064012-CASP8	119.628	0.90106	0.187151	4.81461	1.47e-06	4.3e-05
ENSG00000171611-PTCRA	142.344	0.855631	0.177838	4.8113	1.5e-06	4.36e-05
ENSG00000184900-SUMO3	215.381	-0.681227	0.141792	-4.8044	1.55e-06	4.5e-05
ENSG00000077152-UBE2T	116.275	-0.946469	0.197153	-4.80069	1.58e-06	4.57e-05
ENSG00000121152-NCAPH	74.9059	-1.12172	0.234486	-4.78374	1.72e-06	4.96e-05
ENSG00000100162-CENPM	55.056	-1.32013	0.27643	-4.77563	1.79e-06	5.15e-05
ENSG00000132341-RAN	1045.22	-0.392171	0.0822582	-4.76756	1.86e-06	5.34e-05
ENSG00000146731-CCT6A	399.569	-0.583635	0.122905	-4.74866	2.05e-06	5.85e-05
ENSG00000161980-POLR3K	87.6699	-1.04751	0.221546	-4.72816	2.27e-06	6.45e-05
ENSG00000106948-AKNA	76.1677	1.08719	0.230222	4.72233	2.33e-06	6.62e-05
ENSG00000160201-U2AF1	687.867	-0.462817	0.0981133	-4.71717	2.39e-06	6.77e-05
ENSG00000105373-NOP53	297.621	0.659341	0.140361	4.69747	2.63e-06	7.44e-05
ENSG00000163714-U2SURP	505.204	-0.469753	0.100053	-4.69506	2.67e-06	7.49e-05
ENSG00000163950-SLBP	67.2472	-1.16108	0.247305	-4.69491	2.67e-06	7.49e-05
ENSG00000117399-CDC20	102.497	-0.937487	0.201093	-4.66196	3.13e-06	8.76e-05
ENSG00000100591-AHSA1	210.03	-0.7979	0.171502	-4.65242	3.28e-06	9.15e-05
ENSG00000132507-EIF5A	206.293	-0.724339	0.155761	-4.65031	3.31e-06	9.22e-05
ENSG00000198727-MT-CYB	8631.03	0.33669	0.0725144	4.64308	3.43e-06	9.52e-05
ENSG00000138398-PPIG	473.814	-0.49419	0.106483	-4.64101	3.47e-06	9.59e-05
ENSG00000120438-TCP1	414.505	-0.522299	0.112774	-4.63137	3.63e-06	0.000100181
ENSG00000171490-RSL1D1	211.22	-0.672321	0.145218	-4.62973	3.66e-06	0.000100684
ENSG00000221978-CCNL2	168.805	0.745835	0.161174	4.62751	3.7e-06	0.000101477
ENSG00000143977-SNRPG	703.73	-0.428328	0.0931869	-4.59644	4.3e-06	0.000117501
ENSG00000004455-AK2	232.459	-0.620657	0.13524	-4.5893	4.45e-06	0.000120117
ENSG00000114770-ABCC5	78.6378	1.02835	0.224097	4.58888	4.46e-06	0.000120117
ENSG00000135486-HNRNPA1	785.409	0.48974	0.10669	4.59031	4.43e-06	0.000120117
ENSG00000163507-CIP2A	71.6276	-1.11979	0.243986	-4.58957	4.44e-06	0.000120117
ENSG00000168918-INPP5D	162.153	0.792149	0.172597	4.58958	4.44e-06	0.000120117
ENSG00000100201-DDX17	572.47	0.466083	0.101735	4.58133	4.62e-06	0.000123839
ENSG00000236439-AC099336.2	204.205	0.723076	0.157821	4.58161	4.61e-06	0.000123839
ENSG00000198554-WDHD1	38.1934	-1.50081	0.327759	-4.57902	4.67e-06	0.000124864
ENSG00000153707-PTPRD	33.34	1.59867	0.349186	4.57829	4.69e-06	0.000124953
ENSG00000129292-PHF20L1	276.722	0.592629	0.129706	4.56901	4.9e-06	0.000130248
ENSG00000124733-MEA1	286.097	-0.568981	0.124624	-4.56558	4.98e-06	0.000132028
ENSG00000130706-ADRM1	147.26	-0.788328	0.173322	-4.54835	5.41e-06	0.000142913
ENSG00000092470-WDR76	97.6197	-0.921645	0.202945	-4.54135	5.59e-06	0.000145331
ENSG00000132763-MMACHC	666.92	-0.45355	0.0998656	-4.5416	5.58e-06	0.000145331
ENSG00000143365-RORC	43.4559	1.40768	0.309969	4.54135	5.59e-06	0.000145331
ENSG00000155506-LARP1	498.903	-0.470919	0.103641	-4.54377	5.53e-06	0.000145331
ENSG00000164985-PSIP1	251.239	-0.605659	0.133304	-4.54345	5.53e-06	0.000145331
ENSG00000185338-SOCS1	14.995	2.89517	0.637359	4.54245	5.56e-06	0.000145331
ENSG00000244270-RPL32P29	29.5685	1.70106	0.376175	4.52198	6.13e-06	0.000158853
ENSG00000105821-DNAJC2	189.032	-0.682643	0.151505	-4.50573	6.61e-06	0.000171043
ENSG00000217555-CKLF	149.706	-0.769122	0.170755	-4.50426	6.66e-06	0.000171772
ENSG00000011426-ANLN	53.9127	-1.28044	0.28433	-4.50335	6.69e-06	0.000172037
ENSG00000125944-HNRNPR	395.044	-0.53425	0.118711	-4.50042	6.78e-06	0.000173495
ENSG00000168496-FEN1	92.6224	-0.941949	0.209283	-4.50083	6.77e-06	0.000173495
ENSG00000108344-PSMD3	325.98	-0.656624	0.145996	-4.49754	6.87e-06	0.000175391
ENSG00000126351-THRA	133.703	0.82061	0.182714	4.49122	7.08e-06	0.000180191
ENSG00000134453-RBM17	245.928	-0.617389	0.13752	-4.48945	7.14e-06	0.000181214
ENSG00000127337-YEATS4	134.562	-0.780723	0.173952	-4.48816	7.18e-06	0.000181834
ENSG00000125148-MT2A	59.9159	-1.1823	0.263709	-4.48337	7.35e-06	0.000185327
ENSG00000136104-RNASEH2B	352.326	-0.518578	0.115677	-4.48297	7.36e-06	0.000185327
ENSG00000117322-CR2	33.3673	1.63782	0.365765	4.47781	7.54e-06	0.000188374
ENSG00000132846-ZBED3	82.3053	1.0293	0.229853	4.47808	7.53e-06	0.000188374
ENSG00000189339-SLC35E2B	143.75	0.7868	0.1757	4.4781	7.53e-06	0.000188374
ENSG00000120802-TMPO	205.296	-0.730198	0.163093	-4.47717	7.56e-06	0.000188442
ENSG00000262526-AC120057.2	149.322	0.758579	0.169651	4.47141	7.77e-06	0.000193092
ENSG00000198899-MT-ATP6	18914.2	0.304225	0.0681032	4.46712	7.93e-06	0.000196494
ENSG00000172116-CD8B	218.934	0.631675	0.141512	4.46375	8.05e-06	0.000199091
ENSG00000168488-ATXN2L	93.6479	-1.04376	0.233865	-4.4631	8.08e-06	0.000199181
ENSG00000227081-AC005912.1	190.196	0.793279	0.177802	4.46158	8.14e-06	0.000200079
ENSG00000092841-MYL6	459.092	0.46438	0.104264	4.45388	8.43e-06	0.00020686
ENSG00000166582-CENPV	87.0728	-0.958999	0.215404	-4.45209	8.5e-06	0.000208064
ENSG00000284791-SMIM41	14.0736	2.69916	0.608401	4.43648	9.14e-06	0.000223153
ENSG00000139734-DIAPH3	60.9842	-1.18146	0.266386	-4.43516	9.2e-06	0.000223953
ENSG00000175309-PHYKPL	326.922	-0.580904	0.131116	-4.43045	9.4e-06	0.000228315
ENSG00000257529-RPL36A-HNRNPH2	955.292	0.364175	0.0823231	4.42372	9.7e-06	0.000234951
ENSG00000214106-PAXIP1-AS2	79.532	1.0368	0.235263	4.40699	1.05e-05	0.000253201
ENSG00000109674-NEIL3	43.1492	-1.36022	0.309287	-4.39793	1.09e-05	0.00026334
ENSG00000103342-GSPT1	202.568	-0.682129	0.155328	-4.39153	1.13e-05	0.000270534
ENSG00000113649-TCERG1	535.437	-0.449318	0.102522	-4.38266	1.17e-05	0.00028038
ENSG00000129351-ILF3	557.017	-0.43816	0.0999723	-4.38281	1.17e-05	0.00028038
ENSG00000115232-ITGA4	114.068	-0.849258	0.193994	-4.37775	1.2e-05	0.000286051
ENSG00000160014-CALM3	629.376	-0.416299	0.0953227	-4.36726	1.26e-05	0.00029898
ENSG00000184992-BRI3BP	59.7522	-1.27797	0.292643	-4.36701	1.26e-05	0.00029898
ENSG00000164463-CREBRF	30.5613	1.67416	0.38363	4.36401	1.28e-05	0.000302366
ENSG00000198918-RPL39	1637.33	0.333157	0.0763754	4.3621	1.29e-05	0.00030426
ENSG00000154920-EME1	94.0577	-0.895893	0.205534	-4.35885	1.31e-05	0.000308046
ENSG00000265241-RBM8A	377.692	-0.485888	0.11161	-4.35346	1.34e-05	0.00031494
ENSG00000170296-GABARAP	149.08	0.742818	0.170668	4.3524	1.35e-05	0.00031569
ENSG00000146670-CDCA5	44.8664	-1.33113	0.30601	-4.34994	1.36e-05	0.000318481
ENSG00000100941-PNN	475.131	-0.454938	0.104605	-4.34909	1.37e-05	0.000318928
ENSG00000112029-FBXO5	48.458	-1.26091	0.290054	-4.34716	1.38e-05	0.000320971
ENSG00000123485-HJURP	51.2604	-1.21169	0.278813	-4.3459	1.39e-05	0.000322023
ENSG00000171530-TBCA	816.436	-0.368047	0.0848741	-4.33639	1.45e-05	0.000335461
ENSG00000051180-RAD51	47.3564	-1.27737	0.29485	-4.33227	1.48e-05	0.000340974
ENSG00000126814-TRMT5	169.784	-0.69494	0.160754	-4.323	1.54e-05	0.000354466
ENSG00000142507-PSMB6	313.999	-0.526746	0.12186	-4.32254	1.54e-05	0.000354466
ENSG00000159055-MIS18A	79.1694	-1.0501	0.242958	-4.32212	1.55e-05	0.000354466
ENSG00000130520-LSM4	204.476	-0.626742	0.145056	-4.32068	1.56e-05	0.000355928
ENSG00000130402-ACTN4	260.425	-0.594225	0.137618	-4.31794	1.57e-05	0.000359513
ENSG00000203760-CENPW	111.991	-0.829895	0.192327	-4.31502	1.6e-05	0.000363436
ENSG00000136720-HS6ST1	204.92	-0.65177	0.15113	-4.31264	1.61e-05	0.000366504
ENSG00000131462-TUBG1	91.2061	-0.922936	0.214263	-4.30749	1.65e-05	0.000374234
ENSG00000112742-TTK	57.7692	-1.14168	0.265709	-4.29673	1.73e-05	0.000391931
ENSG00000104904-OAZ1	561.743	-0.462727	0.107716	-4.29581	1.74e-05	0.000392637
ENSG00000198625-MDM4	127.026	0.803343	0.187164	4.29218	1.77e-05	0.000398163
ENSG00000172965-MIR4435-2HG	84.733	0.946624	0.220686	4.28947	1.79e-05	0.000402112
ENSG00000008988-RPS20	1743.35	0.331612	0.0773682	4.28616	1.82e-05	0.000407189
ENSG00000143870-PDIA6	244.984	-0.567427	0.132448	-4.28413	1.83e-05	0.00040847
ENSG00000259781-HMGB1P6	338.927	-0.514323	0.120051	-4.28422	1.83e-05	0.00040847
ENSG00000285396-AC012476.1	46.1528	-1.29565	0.302447	-4.2839	1.84e-05	0.00040847
ENSG00000156876-SASS6	78.3218	-1.0142	0.236928	-4.28063	1.86e-05	0.000413565
ENSG00000077684-JADE1	127.214	-0.757209	0.177	-4.27803	1.89e-05	0.000417452
ENSG00000145050-MANF	160.507	-0.685752	0.160534	-4.2717	1.94e-05	0.000428473
ENSG00000156467-UQCRB	686.003	0.40113	0.0939254	4.27074	1.95e-05	0.000429345
ENSG00000110108-TMEM109	79.8015	-1.01802	0.238416	-4.26993	1.96e-05	0.000429909
ENSG00000170485-NPAS2	61.64	1.15578	0.270825	4.26763	1.98e-05	0.000433326
ENSG00000248527-MTATP6P1	4581.73	0.299219	0.0701217	4.26714	1.98e-05	0.000433326
ENSG00000101972-STAG2	369.453	-0.514726	0.120651	-4.26623	1.99e-05	0.000434096
ENSG00000187741-FANCA	101.972	-0.894403	0.209994	-4.25918	2.05e-05	0.000446985
ENSG00000112640-PPP2R5D	276.137	-0.54222	0.127497	-4.2528	2.11e-05	0.000458873
ENSG00000277978-AC010542.5	110.716	-0.82633	0.194481	-4.2489	2.15e-05	0.000465872
ENSG00000198938-MT-CO3	21833	0.296758	0.0698539	4.24827	2.15e-05	0.000466135
ENSG00000086061-DNAJA1	214.734	-0.688819	0.162574	-4.23697	2.27e-05	0.000489104
ENSG00000197785-ATAD3A	40.9464	-1.37556	0.325265	-4.22904	2.35e-05	0.00050552
ENSG00000280987-MATR3	411.263	-0.464412	0.10994	-4.22424	2.4e-05	0.000515244
ENSG00000164649-CDCA7L	78.933	-0.957522	0.226847	-4.22101	2.43e-05	0.0005215
ENSG00000174231-PRPF8	219.42	-0.621977	0.147377	-4.22031	2.44e-05	0.000521958
ENSG00000153187-HNRNPU	877.659	-0.37479	0.0888427	-4.21858	2.46e-05	0.000524796
ENSG00000163346-PBXIP1	13.2617	2.79192	0.663184	4.20988	2.56e-05	0.000544215
ENSG00000091436-MAP3K20	64.5322	-1.03781	0.246961	-4.20232	2.64e-05	0.000560197
ENSG00000105011-ASF1B	78.1762	-0.999841	0.237899	-4.2028	2.64e-05	0.000560197
ENSG00000177410-ZFAS1	366.992	0.524685	0.124963	4.19871	2.68e-05	0.000567947
ENSG00000227751-AC004824.1	439.723	-0.528407	0.125913	-4.19662	2.71e-05	0.00057194
ENSG00000187764-SEMA4D	78.9381	0.951617	0.227048	4.19126	2.77e-05	0.000584326
ENSG00000183199-HSP90AB3P	211.498	-0.610265	0.14575	-4.18706	2.83e-05	0.000593951
ENSG00000171241-SHCBP1	27.4284	-1.64968	0.394583	-4.18083	2.9e-05	0.000609108
ENSG00000152818-UTRN	99.3631	0.829721	0.198493	4.18011	2.91e-05	0.00060971
ENSG00000163482-STK36	30.0764	1.59951	0.382847	4.17793	2.94e-05	0.000614228
ENSG00000136492-BRIP1	34.9331	-1.43284	0.343025	-4.17705	2.95e-05	0.000615247
ENSG00000167004-PDIA3	146.604	-0.707825	0.169756	-4.16967	3.05e-05	0.000634145
ENSG00000244398-AC116533.1	601.158	0.464526	0.111549	4.16433	3.12e-05	0.000647753
ENSG00000158417-EIF5B	782.247	-0.374683	0.0901186	-4.15767	3.22e-05	0.000665491
ENSG00000197299-BLM	62.6316	-1.0558	0.25421	-4.15325	3.28e-05	0.000676999
ENSG00000163918-RFC4	53.0333	-1.17506	0.283298	-4.14778	3.36e-05	0.000691866
ENSG00000015479-MATR3	412.013	-0.45478	0.109687	-4.14616	3.38e-05	0.00069379
ENSG00000163349-HIPK1	84.596	0.947381	0.228486	4.14634	3.38e-05	0.00069379
ENSG00000163399-ATP1A1	123.813	-0.805998	0.19451	-4.14374	3.42e-05	0.000699658
ENSG00000224032-EPB41L4A-AS1	86.2013	0.931223	0.224759	4.14321	3.42e-05	0.00069978
ENSG00000139675-HNRNPA1L2	175.281	0.707539	0.170887	4.14039	3.47e-05	0.000706921
ENSG00000275895-U2AF1L5	675.876	-0.426133	0.102957	-4.13895	3.49e-05	0.000709839
ENSG00000168078-PBK	21.8413	-1.86941	0.452356	-4.13261	3.59e-05	0.000728169
ENSG00000134001-EIF2S1	104.296	-0.823104	0.199261	-4.13077	3.62e-05	0.000732456
ENSG00000112312-GMNN	374.927	-0.520068	0.125956	-4.12896	3.64e-05	0.000736698
ENSG00000123136-DDX39A	179.841	-0.634661	0.153766	-4.12745	3.67e-05	0.000739969
ENSG00000130204-TOMM40	138.766	-0.740616	0.17969	-4.12164	3.76e-05	0.000757286
ENSG00000151465-CDC123	132.648	-0.730446	0.177499	-4.11522	3.87e-05	0.000777051
ENSG00000172534-HCFC1	304.239	-0.563669	0.137	-4.11438	3.88e-05	0.000778225
ENSG00000173674-EIF1AX	278.414	-0.533839	0.130051	-4.10484	4.05e-05	0.000808575
ENSG00000198431-TXNRD1	107.957	-0.817298	0.199118	-4.10458	4.05e-05	0.000808575
ENSG00000164308-ERAP2	47.901	1.2151	0.296411	4.09939	4.14e-05	0.000825207
ENSG00000063244-U2AF2	155.083	-0.713353	0.174075	-4.09797	4.17e-05	0.000828539
ENSG00000076248-UNG	55.2069	-1.17221	0.286092	-4.09733	4.18e-05	0.000829113
ENSG00000137812-KNL1	113.919	-0.813923	0.198784	-4.09452	4.23e-05	0.0008375
ENSG00000105176-URI1	243.945	-0.545461	0.133269	-4.09293	4.26e-05	0.000839769
ENSG00000120694-HSPH1	215.863	-0.614721	0.150174	-4.0934	4.25e-05	0.000839769
ENSG00000166295-ANAPC16	123.153	0.759967	0.185729	4.09181	4.28e-05	0.000842085
ENSG00000100028-SNRPD3	224.511	-0.622658	0.152488	-4.08332	4.44e-05	0.00087166
ENSG00000020633-RUNX3	120.573	-0.81412	0.199485	-4.08111	4.48e-05	0.000876663
ENSG00000139514-SLC7A1	95.279	-0.865305	0.21203	-4.08104	4.48e-05	0.000876663
ENSG00000171858-RPS21	2800.84	0.300852	0.0738256	4.07517	4.6e-05	0.000897228
ENSG00000102898-NUTF2	301.06	-0.532298	0.130681	-4.07326	4.64e-05	0.000902785
ENSG00000188873-RPL10AP2	614.839	0.404595	0.099448	4.06841	4.73e-05	0.0009199
ENSG00000054598-FOXC1	21.2148	1.83414	0.451877	4.05893	4.93e-05	0.00095609
ENSG00000188163-FAM166A	60.9985	-1.04315	0.257155	-4.05649	4.98e-05	0.000964172
ENSG00000144736-SHQ1	60.7964	-1.04272	0.257174	-4.05454	5.02e-05	0.000970305
ENSG00000148019-CEP78	69.8005	-0.958958	0.237474	-4.03816	5.39e-05	0.00103846
ENSG00000233639-PANTR1	17.7994	1.9974	0.494782	4.03693	5.42e-05	0.00104185
ENSG00000257553-AC034102.4	152.371	-0.700512	0.173581	-4.03565	5.45e-05	0.0010454
ENSG00000173113-TRMT112	479.719	-0.415055	0.103048	-4.02777	5.63e-05	0.00107889
ENSG00000081237-PTPRC	230.168	0.565392	0.140413	4.02663	5.66e-05	0.00107983
ENSG00000143321-HDGF	198.582	-0.610291	0.151549	-4.02701	5.65e-05	0.00107983
ENSG00000166801-FAM111A	88.8053	-0.879883	0.218677	-4.02368	5.73e-05	0.00109127
ENSG00000267541-MTCO2P2	540.264	0.409577	0.101898	4.01947	5.83e-05	0.00110872
ENSG00000124207-CSE1L	100.704	-0.796815	0.19861	-4.01196	6.02e-05	0.00114234
ENSG00000196419-XRCC6	344.76	-0.475249	0.118691	-4.00408	6.23e-05	0.00117872
ENSG00000130309-COLGALT1	96.0908	-0.836021	0.209309	-3.99419	6.49e-05	0.00122657
ENSG00000113460-BRIX1	109.638	-0.805409	0.202045	-3.9863	6.71e-05	0.00126559
ENSG00000197756-RPL37A	6151.47	0.266806	0.0670556	3.97887	6.92e-05	0.00130319
ENSG00000153563-CD8A	203.702	0.592867	0.149118	3.97582	7.01e-05	0.00131483
ENSG00000166226-CCT2	333.341	-0.474436	0.119329	-3.97587	7.01e-05	0.00131483
ENSG00000065911-MTHFD2	90.9375	-0.857785	0.216273	-3.96622	7.3e-05	0.00136357
ENSG00000154640-BTG3	44.5961	-1.2071	0.304342	-3.96627	7.3e-05	0.00136357
ENSG00000132361-CLUH	121.675	-0.75357	0.190165	-3.96271	7.41e-05	0.00138105
ENSG00000279865-AC006511.3	254.352	0.636331	0.160599	3.96222	7.43e-05	0.00138119
ENSG00000263146-LINC01896	25.5945	1.65559	0.418557	3.95546	7.64e-05	0.00141805
ENSG00000131016-AKAP12	63.7173	-0.982221	0.2484	-3.95419	7.68e-05	0.00141931
ENSG00000163938-GNL3	131.845	-0.716892	0.181312	-3.95392	7.69e-05	0.00141931
ENSG00000169813-HNRNPF	244.546	-0.52408	0.132549	-3.95386	7.69e-05	0.00141931
ENSG00000108829-LRRC59	125.201	-0.709529	0.179955	-3.94281	8.05e-05	0.0014835
ENSG00000138495-COX17	255.019	-0.525158	0.133213	-3.94224	8.07e-05	0.00148411
ENSG00000161010-MRNIP	103.539	0.770159	0.195409	3.94127	8.1e-05	0.00148726
ENSG00000172757-CFL1	1071.91	-0.314414	0.0798178	-3.93914	8.18e-05	0.00149767
ENSG00000175567-UCP2	99.8214	0.791898	0.201098	3.93787	8.22e-05	0.00150276
ENSG00000121211-MND1	86.4416	-0.867988	0.22118	-3.92436	8.7e-05	0.0015866
ENSG00000104131-EIF3J	488.26	-0.411515	0.104925	-3.922	8.78e-05	0.00159912
ENSG00000111445-RFC5	44.0354	-1.17388	0.299347	-3.92148	8.8e-05	0.00159956
ENSG00000188486-H2AFX	58.9397	-1.07196	0.273623	-3.91766	8.94e-05	0.00162203
ENSG00000127184-COX7C	799.705	0.389302	0.0994645	3.91398	9.08e-05	0.0016438
ENSG00000147874-HAUS6	63.2112	-0.98727	0.252358	-3.91219	9.15e-05	0.00165294
ENSG00000183955-KMT5A	88.9294	-0.901302	0.230567	-3.90907	9.27e-05	0.00167123
ENSG00000179362-HMGN2P46	102.975	-0.847364	0.217248	-3.90045	9.6e-05	0.00172766
ENSG00000186480-INSIG1	157.828	0.656601	0.168354	3.90013	9.61e-05	0.00172766
ENSG00000283041-AC008038.1	232.672	0.623934	0.160026	3.89895	9.66e-05	0.00173284
ENSG00000136167-LCP1	635.147	-0.400701	0.102794	-3.8981	9.7e-05	0.00173564
ENSG00000055332-EIF2AK2	60.6596	-1.06866	0.274437	-3.894	9.86e-05	0.00176197
ENSG00000136108-CKAP2	65.2217	-0.983019	0.252571	-3.89204	9.94e-05	0.00177291
ENSG00000168393-DTYMK	90.565	-0.823775	0.212072	-3.88442	0.000102577	0.00182609
ENSG00000112578-BYSL	71.703	-0.929397	0.239503	-3.88052	0.000104231	0.0018521
ENSG00000185811-IKZF1	208.434	0.558461	0.144002	3.87815	0.000105253	0.00186678
ENSG00000004660-CAMKK1	14.4387	2.25392	0.581296	3.8774	0.000105578	0.00186906
ENSG00000139343-SNRPF	300.431	-0.512538	0.132204	-3.87687	0.00010581	0.0018697
ENSG00000141076-UTP4	160.691	-0.691661	0.178458	-3.87576	0.000106294	0.00187479
ENSG00000127663-KDM4B	68.3457	0.956441	0.246814	3.87514	0.000106562	0.00187605
ENSG00000149925-ALDOA	274.728	-0.556061	0.143588	-3.87261	0.000107675	0.00189215
ENSG00000164597-COG5	42.4676	1.22306	0.31612	3.86897	0.000109296	0.0019171
ENSG00000179051-RCC2	463.995	-0.479352	0.12396	-3.86697	0.000110194	0.0019293
ENSG00000196924-FLNA	167.825	-0.700015	0.181238	-3.8624	0.00011228	0.00196223
ENSG00000285043-AC093512.2	274.562	-0.554637	0.143963	-3.85263	0.000116858	0.0020385
ENSG00000164096-C4orf3	70.1345	1.18316	0.307236	3.85099	0.000117639	0.00204838
ENSG00000253729-PRKDC	169.65	-0.649527	0.168832	-3.84717	0.00011949	0.00207681
ENSG00000144354-CDCA7	175.639	-0.62685	0.162997	-3.84577	0.000120175	0.00208493
ENSG00000102445-RUBCNL	184.746	0.584924	0.152165	3.84402	0.000121036	0.00209605
ENSG00000118705-RPN2	167.842	-0.667843	0.173824	-3.84206	0.000122006	0.00210902
ENSG00000138385-SSB	452.095	-0.447006	0.11653	-3.83597	0.000125071	0.00215421
ENSG00000147403-RPL10	882.981	0.341122	0.0889228	3.83616	0.000124975	0.00215421
ENSG00000094916-CBX5	350.986	-0.444738	0.116129	-3.82968	0.000128312	0.00220604
ENSG00000153363-LINC00467	42.3311	1.18495	0.309521	3.82835	0.000129007	0.002214
ENSG00000113916-BCL6	73.8972	0.900765	0.235822	3.81968	0.000133627	0.00228917
ENSG00000127022-CANX	618.029	-0.351156	0.0920671	-3.81413	0.000136662	0.00233696
ENSG00000025770-NCAPH2	39.9625	-1.3184	0.345941	-3.81106	0.00013837	0.00236194
ENSG00000260342-AC138811.2	1019.71	0.427762	0.112278	3.80984	0.000139055	0.0023694
ENSG00000180628-PCGF5	334.642	-0.455276	0.119581	-3.80726	0.000140515	0.00239
ENSG00000108179-PPIF	85.8909	-0.822825	0.216275	-3.80453	0.000142072	0.0024122
ENSG00000137845-ADAM10	209.465	0.557364	0.146531	3.80373	0.000142535	0.00241575
ENSG00000122515-ZMIZ2	56.2613	1.03388	0.271924	3.80209	0.000143483	0.00242751
ENSG00000213707-HMGB1P10	164.756	-0.619406	0.163051	-3.79884	0.000145376	0.00245517
ENSG00000169230-PRELID1	361.955	-0.492	0.129604	-3.79619	0.000146938	0.00247717
ENSG00000180385-EMC3-AS1	42.6759	-1.18214	0.311482	-3.79523	0.000147506	0.00248236
ENSG00000227097-RPS28P7	180.569	0.582782	0.153669	3.79244	0.000149173	0.00250599
ENSG00000111206-FOXM1	42.8589	-1.25594	0.331597	-3.78755	0.000152138	0.00255132
ENSG00000087586-AURKA	118.592	-0.753836	0.199262	-3.78314	0.000154861	0.00259242
ENSG00000149554-CHEK1	46.3591	-1.18243	0.312615	-3.78237	0.00015534	0.00259589
ENSG00000134419-RPS15A	2172.78	0.298844	0.0790315	3.78133	0.000155992	0.00260039
ENSG00000249353-NPM1P27	58.3205	-1.02304	0.270569	-3.78107	0.000156154	0.00260039
ENSG00000124831-LRRFIP1	224.265	-0.52903	0.14004	-3.7777	0.000158281	0.00263122
ENSG00000249565-SERBP1P5	65.8687	-0.924109	0.244718	-3.77622	0.000159229	0.00264237
ENSG00000128944-KNSTRN	58.391	-1.01805	0.269645	-3.77552	0.000159677	0.00264521
ENSG00000166483-WEE1	50.9885	-1.06435	0.282284	-3.77049	0.000162928	0.00269438
ENSG00000125166-GOT2	208.548	-0.543114	0.144094	-3.76917	0.000163792	0.00270399
ENSG00000111247-RAD51AP1	69.8771	-0.924989	0.24577	-3.76364	0.000167459	0.00275974
ENSG00000186174-BCL9L	16.4499	2.07282	0.551698	3.75716	0.000171853	0.00282728
ENSG00000123505-AMD1	160.795	-0.610035	0.162477	-3.7546	0.000173618	0.00285141
ENSG00000058668-ATP2B4	48.5005	1.10174	0.293562	3.75302	0.000174719	0.00286455
ENSG00000006634-DBF4	83.642	-0.898866	0.239557	-3.75221	0.000175283	0.00286886
ENSG00000233913-RPL10P9	167.391	0.601036	0.160329	3.74877	0.000177706	0.00290355
ENSG00000188807-TMEM201	23.9083	-1.60654	0.42916	-3.74344	0.000181518	0.00296077
ENSG00000162604-TM2D1	90.6969	0.800233	0.214142	3.73693	0.000186278	0.00303321
ENSG00000101412-E2F1	36.6691	-1.24782	0.334059	-3.73533	0.000187471	0.00304743
ENSG00000197956-S100A6	96.0427	0.778221	0.208372	3.73476	0.000187895	0.00304914
ENSG00000155959-VBP1	99.6209	-0.77724	0.208357	-3.73033	0.000191227	0.00309794
ENSG00000145675-PIK3R1	239.775	0.516482	0.138502	3.72905	0.000192204	0.00310324
ENSG00000255508-AP002990.1	1015.8	0.295725	0.0792989	3.72924	0.000192056	0.00310324
ENSG00000148229-POLE3	287.38	-0.471809	0.126572	-3.72761	0.000193306	0.00311575
ENSG00000115758-ODC1	133.909	-0.669995	0.179852	-3.72526	0.000195117	0.00313964
ENSG00000123975-CKS2	44.6288	-1.10287	0.296155	-3.72398	0.000196107	0.00315025
ENSG00000102054-RBBP7	161.975	-0.587275	0.157881	-3.71974	0.000199428	0.00319822
ENSG00000120616-EPC1	214.841	0.517999	0.139288	3.71891	0.000200082	0.00320332
ENSG00000133169-BEX1	520.035	0.361071	0.0971151	3.71797	0.00020083	0.00320991
ENSG00000242125-SNHG3	197.196	-0.588555	0.158344	-3.71693	0.000201658	0.00321776
ENSG00000108953-YWHAE	705.889	-0.331566	0.0892159	-3.71645	0.000202043	0.00321853
ENSG00000088205-DDX18	359.202	-0.427028	0.114924	-3.71575	0.0002026	0.00322201
ENSG00000166750-SLFN5	59.173	0.969769	0.26102	3.7153	0.000202962	0.00322241
ENSG00000108468-CBX1	139.493	-0.65441	0.176405	-3.7097	0.000207504	0.00328904
ENSG00000254772-EEF1G	1012.17	0.295528	0.079683	3.7088	0.000208245	0.00329532
ENSG00000071539-TRIP13	40.081	-1.24026	0.335383	-3.69803	0.000217283	0.00343091
ENSG00000115165-CYTIP	41.7931	1.12506	0.304256	3.69773	0.000217533	0.00343091
ENSG00000178177-LCORL	155.492	-0.615525	0.166487	-3.69713	0.000218053	0.00343343
ENSG00000150867-PIP4K2A	79.131	0.867717	0.234735	3.69658	0.000218522	0.00343516
ENSG00000149187-CELF1	511.642	-0.366004	0.0990897	-3.69366	0.000221049	0.00346916
ENSG00000087087-SRRT	265.127	-0.493911	0.133821	-3.69084	0.000223514	0.00350208
ENSG00000068489-PRR11	107.293	-0.744229	0.201749	-3.68888	0.000225241	0.00352337
ENSG00000108384-RAD51C	76.6076	-0.851068	0.230827	-3.68704	0.000226877	0.00354315
ENSG00000126067-PSMB2	333.964	-0.433243	0.117606	-3.68387	0.000229723	0.00358173
ENSG00000109475-RPL34	2808.69	0.246302	0.0668821	3.68262	0.000230846	0.00359336
ENSG00000260570-AC133550.1	56.3028	-1.2587	0.342238	-3.67784	0.00023522	0.00365549
ENSG00000120915-EPHX2	32.1432	1.348	0.367128	3.67175	0.000240896	0.00373761
ENSG00000197471-SPN	293.156	-0.529958	0.144375	-3.67069	0.000241897	0.00374704
ENSG00000267523-AC008735.2	117.929	-0.728939	0.19867	-3.6691	0.000243405	0.00376429
ENSG00000090889-KIF4A	60.6466	-0.947987	0.258776	-3.66334	0.000248943	0.00384372
ENSG00000241343-RPL36A	1458.35	0.269363	0.0737627	3.65175	0.000260461	0.00401506
ENSG00000080986-NDC80	64.1718	-0.91309	0.2502	-3.64944	0.000262814	0.00403828
ENSG00000258092-AC005841.1	39.3186	-1.2392	0.339522	-3.64983	0.000262412	0.00403828
ENSG00000106263-EIF3B	244.621	-0.494425	0.135676	-3.64417	0.000268261	0.00411535
ENSG00000185104-FAF1	128.22	-0.68137	0.187454	-3.63486	0.000278126	0.00425984
ENSG00000138081-FBXO11	152.332	-0.633382	0.174277	-3.63435	0.000278686	0.00426157
ENSG00000143401-ANP32E	168.086	-0.572883	0.157772	-3.63108	0.000282235	0.00430893
ENSG00000100216-TOMM22	199.66	-0.545694	0.150356	-3.62933	0.000284152	0.00433128
ENSG00000213347-MXD3	412.354	-0.453956	0.125095	-3.62889	0.000284642	0.00433183
ENSG00000173230-GOLGB1	193.52	0.54142	0.149227	3.62817	0.000285432	0.00433693
ENSG00000147649-MTDH	827.779	-0.308735	0.0852267	-3.62251	0.000291758	0.004426
ENSG00000108064-TFAM	145.393	-0.610855	0.168713	-3.62066	0.000293847	0.00445061
ENSG00000102753-KPNA3	120.461	-0.764911	0.21167	-3.61369	0.000301866	0.00456483
ENSG00000113240-CLK4	41.0132	1.12776	0.312574	3.60797	0.000308604	0.00465934
ENSG00000141858-SAMD1	139.941	-0.637734	0.176949	-3.60405	0.0003133	0.00472276
ENSG00000124562-SNRPC	298.975	-0.492426	0.136755	-3.60079	0.000317256	0.00477485
ENSG00000110958-PTGES3	264.747	-0.45675	0.126886	-3.5997	0.000318582	0.00478725
ENSG00000153310-FAM49B	137.607	-0.613007	0.170329	-3.59895	0.000319507	0.00478799
ENSG00000255717-SNHG1	187.519	-0.554627	0.154112	-3.59884	0.000319634	0.00478799
ENSG00000103275-UBE2I	252.982	-0.511781	0.14224	-3.59801	0.000320659	0.00479581
ENSG00000174780-SRP72	371.062	-0.410781	0.114185	-3.59752	0.000321269	0.00479741
ENSG00000068724-TTC7A	66.3518	-0.890372	0.24755	-3.59673	0.000322239	0.00480438
ENSG00000167470-MIDN	268.728	0.485613	0.135052	3.59576	0.000323446	0.00481485
ENSG00000198408-OGA	147.493	0.594882	0.165633	3.59157	0.000328695	0.00488536
ENSG00000165304-MELK	31.2654	-1.29524	0.360692	-3.59097	0.000329447	0.00488541
ENSG00000274810-NPHP3-ACAD11	14.0233	2.09612	0.583754	3.59075	0.000329722	0.00488541
ENSG00000137818-RPLP1	2991.19	0.224165	0.0624567	3.58913	0.00033179	0.00490843
ENSG00000175334-BANF1	184.824	-0.547074	0.152489	-3.58763	0.000333698	0.00492902
ENSG00000138180-CEP55	48.0199	-1.06327	0.296475	-3.58636	0.000335332	0.0049455
ENSG00000162063-CCNF	61.7479	-0.947031	0.264552	-3.57975	0.000343918	0.0050643
ENSG00000177084-POLE	55.5771	-0.959873	0.268507	-3.57486	0.000350419	0.00515208
ENSG00000184207-PGP	75.5761	-0.825431	0.231067	-3.57225	0.000353928	0.00519566
ENSG00000259020-AL049872.1	39.1505	-1.15292	0.322829	-3.5713	0.000355211	0.00520649
ENSG00000090273-NUDC	183.719	-0.5575	0.156142	-3.57047	0.000356335	0.00521495
ENSG00000069345-DNAJA2	79.4599	-0.799594	0.224147	-3.56728	0.000360711	0.00524681
ENSG00000111913-RIPOR2	42.5961	1.11153	0.311565	3.56756	0.000360319	0.00524681
ENSG00000123933-MXD4	38.0832	1.16702	0.327138	3.56735	0.000360605	0.00524681
ENSG00000134057-CCNB1	101.139	-0.732376	0.205301	-3.56733	0.000360643	0.00524681
ENSG00000100526-CDKN3	94.45	-0.796695	0.223373	-3.56666	0.000361558	0.00525112
ENSG00000125347-IRF1	66.1733	-0.948118	0.266056	-3.5636	0.000365804	0.00530471
ENSG00000107959-PITRM1	38.5434	1.15247	0.323486	3.56265	0.000367124	0.00531578
ENSG00000080608-PUM3	144.716	-0.628906	0.17666	-3.55998	0.000370887	0.00536213
ENSG00000224861-YBX1P1	104.63	-0.700659	0.197043	-3.55587	0.000376734	0.00543842
ENSG00000234287-AC099560.2	261.421	0.496269	0.139741	3.55135	0.000383259	0.00552426
ENSG00000053372-MRTO4	114.156	-0.765519	0.215592	-3.55077	0.00038411	0.00552817
ENSG00000251562-MALAT1	4574.81	0.251574	0.0708731	3.54964	0.000385754	0.00554348
ENSG00000172336-POP7	100.308	-0.771106	0.217306	-3.54848	0.000387462	0.00555964
ENSG00000100380-ST13	198.802	-0.537241	0.151445	-3.54743	0.00038901	0.00557348
ENSG00000154839-SKA1	26.4273	-1.41502	0.398972	-3.54668	0.000390122	0.00558102
ENSG00000048471-SNX29	33.6148	1.25519	0.354094	3.5448	0.000392908	0.00560408
ENSG00000174371-EXO1	28.1705	-1.38369	0.390337	-3.54486	0.000392816	0.00560408
ENSG00000132600-PRMT7	144.591	0.591624	0.166982	3.54304	0.000395542	0.00563323
ENSG00000108518-PFN1	334.192	-0.445878	0.125952	-3.54006	0.000400032	0.00568022
ENSG00000171320-ESCO2	29.4335	-1.38654	0.391666	-3.54011	0.000399961	0.00568022
ENSG00000170860-LSM3	164.197	-0.559466	0.158171	-3.53711	0.000404535	0.00573562
ENSG00000164109-MAD2L1	23.1689	-1.48562	0.420708	-3.53124	0.000413619	0.00585572
ENSG00000130332-LSM7	145.229	-0.708497	0.200827	-3.52789	0.000418886	0.0059215
ENSG00000240342-RPS2P5	450.4	0.390561	0.110875	3.52254	0.000427438	0.00603345
ENSG00000075415-SLC25A3	398.19	0.407132	0.115624	3.52118	0.000429625	0.00605537
ENSG00000101773-RBBP8	136.839	-0.637231	0.180995	-3.52072	0.000430384	0.00605711
ENSG00000175279-CENPS	55.1215	-0.94808	0.269376	-3.51954	0.000432295	0.00607505
ENSG00000089006-SNX5	166.436	-0.564557	0.160505	-3.51738	0.000435824	0.00611563
ENSG00000006625-GGCT	114.976	-0.684349	0.194619	-3.51636	0.00043751	0.00613028
ENSG00000106261-ZKSCAN1	109.013	0.702836	0.200021	3.51381	0.000441722	0.00617599
ENSG00000198134-PTMAP9	54.3846	-0.969767	0.276003	-3.51361	0.000442067	0.00617599
ENSG00000215440-NPEPL1	24.6191	1.42789	0.406812	3.50995	0.000448189	0.00625236
ENSG00000115816-CEBPZ	223.947	-0.499673	0.142496	-3.50658	0.000453902	0.00632282
ENSG00000196352-CD55	38.0939	1.15462	0.329407	3.50514	0.000456372	0.00634796
ENSG00000166289-PLEKHF1	44.7659	1.06124	0.303045	3.50194	0.000461879	0.00641521
ENSG00000125885-MCM8	69.9125	-0.869579	0.248545	-3.49868	0.000467572	0.00646605
ENSG00000154025-SLC5A10	31.3636	1.25227	0.357922	3.49872	0.000467497	0.00646605
ENSG00000174442-ZWILCH	81.1866	-0.777662	0.222249	-3.49906	0.000466909	0.00646605
ENSG00000230457-PA2G4P4	68.9873	-0.931485	0.266385	-3.49676	0.000470945	0.00650326
ENSG00000261061-AC092718.4	22.1972	-1.55761	0.445717	-3.49462	0.000474742	0.00654623
ENSG00000224078-SNHG14	62.6017	0.872459	0.249889	3.49138	0.000480525	0.0066164
ENSG00000161011-SQSTM1	128.38	0.613855	0.175912	3.48955	0.000483838	0.00665243
ENSG00000138795-LEF1	895.015	0.368913	0.105753	3.48844	0.000485855	0.00667055
ENSG00000167721-TSR1	117.037	-0.664804	0.190608	-3.48781	0.000486997	0.00667662
ENSG00000072571-HMMR	115.54	-0.67595	0.193917	-3.48576	0.000490738	0.00671826
ENSG00000163811-WDR43	348.169	-0.406502	0.116647	-3.48489	0.000492336	0.00673047
ENSG00000142676-RPL11	2433.15	0.250193	0.0718921	3.48011	0.000501199	0.00684183
ENSG00000110104-CCDC86	95.8487	-0.758861	0.21809	-3.47957	0.000502213	0.00684588
ENSG00000124784-RIOK1	255.874	-0.471081	0.13543	-3.4784	0.000504417	0.00685738
ENSG00000125637-PSD4	76.0869	0.804177	0.231203	3.47823	0.000504732	0.00685738
ENSG00000234428-AC023051.1	25.5555	1.39403	0.400817	3.47798	0.000505213	0.00685738
ENSG00000256813-AP000777.3	94.6691	-0.765031	0.220117	-3.47556	0.000509786	0.00690962
ENSG00000127914-AKAP9	352.732	0.411729	0.118604	3.47146	0.00051763	0.00700599
ENSG00000139168-ZCRB1	125.28	-0.634584	0.183216	-3.46359	0.000533014	0.007204
ENSG00000153044-CENPH	68.8618	-0.880177	0.25426	-3.46173	0.000536723	0.00724386
ENSG00000005194-CIAPIN1	79.6533	0.781065	0.225917	3.45731	0.000545605	0.00734703
ENSG00000183336-BOLA2	148.91	-0.56602	0.163724	-3.45716	0.000545907	0.00734703
ENSG00000171793-CTPS1	146.017	-0.602688	0.174502	-3.45376	0.000552832	0.00742975
ENSG00000106628-POLD2	197.022	-0.503841	0.145942	-3.45235	0.000555731	0.00744774
ENSG00000114867-EIF4G1	220.013	-0.47836	0.138558	-3.45241	0.000555594	0.00744774
ENSG00000164466-SFXN1	139.931	-0.599498	0.173839	-3.44857	0.000563558	0.00754203
ENSG00000076382-SPAG5	53.7263	-1.00673	0.292024	-3.44744	0.00056593	0.00756317
ENSG00000142856-ITGB3BP	91.8097	-0.764136	0.221751	-3.44592	0.000569115	0.0075951
ENSG00000104325-DECR1	49.4359	1.03349	0.300071	3.44414	0.000572884	0.00763473
ENSG00000143549-TPM3	377.599	-0.395119	0.114893	-3.43901	0.000583844	0.00776994
ENSG00000146963-LUC7L2	272.165	-0.445846	0.12969	-3.43778	0.000586505	0.00779447
ENSG00000178691-SUZ12	207.018	-0.496802	0.144557	-3.43672	0.000588806	0.00781417
ENSG00000167468-GPX4	82.3456	-0.763412	0.222187	-3.43589	0.000590606	0.00782717
ENSG00000010810-FYN	85.0934	0.738652	0.21503	3.43511	0.000592313	0.00782935
ENSG00000263809-AC135178.2	471.87	0.436327	0.127022	3.43507	0.000592412	0.00782935
ENSG00000103540-CCP110	102.826	-0.687135	0.200255	-3.43129	0.000600712	0.00792806
ENSG00000231500-RPS18	2056.79	0.279688	0.081553	3.42952	0.000604644	0.00796894
ENSG00000273270-AC090114.2	18.1391	1.68403	0.491293	3.42776	0.000608577	0.00800971
ENSG00000076003-MCM6	155.609	-0.561707	0.163908	-3.42696	0.000610382	0.0080224
ENSG00000174799-CEP135	89.8611	-0.759597	0.221759	-3.42533	0.000614053	0.00805955
ENSG00000111674-ENO2	68.1753	-0.869146	0.253847	-3.4239	0.000617286	0.00808099
ENSG00000124380-SNRNP27	225.952	-0.479369	0.140008	-3.42386	0.00061738	0.00808099
ENSG00000131470-PSMC3IP	31.6489	-1.22123	0.356843	-3.42232	0.000620892	0.00809365
ENSG00000135316-SYNCRIP	266.009	-0.463661	0.135476	-3.42245	0.000620596	0.00809365
ENSG00000213585-VDAC1	312.411	-0.413308	0.120755	-3.42271	0.000620011	0.00809365
ENSG00000198056-PRIM1	26.3993	-1.36189	0.398121	-3.4208	0.000624366	0.00812783
ENSG00000040275-SPDL1	114.917	-0.633639	0.185287	-3.41976	0.000626761	0.0081479
ENSG00000141543-EIF4A3	114.249	-0.645981	0.188957	-3.41868	0.000629263	0.00816929
ENSG00000184220-CMSS1	99.3417	-0.712646	0.208533	-3.41742	0.000632166	0.00819582
ENSG00000105968-H2AFV	513.591	-0.349673	0.102337	-3.41688	0.000633432	0.00820109
ENSG00000050393-MCUR1	93.0814	-0.719673	0.210656	-3.41634	0.000634679	0.00820611
ENSG00000100422-CERK	57.9556	0.957075	0.280272	3.41481	0.000638273	0.00824141
ENSG00000168566-SNRNP48	246.399	-0.449216	0.131599	-3.41352	0.000641283	0.00826909
ENSG00000160683-CXCR5	14.665	1.95021	0.572035	3.40925	0.000651408	0.00838831
ENSG00000101182-PSMA7	698.95	-0.335369	0.0984579	-3.40622	0.000658697	0.00845934
ENSG00000171960-PPIH	98.6552	-0.706843	0.207494	-3.40657	0.000657842	0.00845934
ENSG00000137038-DMAC1	85.7955	0.738352	0.216858	3.40477	0.000662202	0.00849292
ENSG00000177733-HNRNPA0	202.352	-0.491272	0.14433	-3.40382	0.0006645	0.00851095
ENSG00000213160-KLHL23	75.0767	-0.78761	0.231482	-3.40247	0.00066779	0.00854162
ENSG00000085840-ORC1	19.4861	-1.67595	0.492863	-3.40044	0.000672764	0.00857166
ENSG00000138286-FAM149B1	80.7923	-0.75863	0.223082	-3.40068	0.000672183	0.00857166
ENSG00000159259-CHAF1B	25.4725	-1.36455	0.40129	-3.40042	0.000672833	0.00857166
ENSG00000261740-BOLA2-SMG1P6	151.672	-0.550914	0.162077	-3.3991	0.00067609	0.00860167
ENSG00000121210-TMEM131L	152.979	0.562808	0.165665	3.39727	0.000680615	0.00864771
ENSG00000198744-MTCO3P12	1032.59	0.369631	0.108818	3.39677	0.000681866	0.00865208
ENSG00000120699-EXOSC8	141.991	-0.613523	0.180653	-3.39615	0.000683419	0.00866027
ENSG00000176619-LMNB2	50.6817	-0.95571	0.28152	-3.39482	0.000686746	0.00869089
ENSG00000004478-FKBP4	61.7504	-0.878156	0.258763	-3.39367	0.000689629	0.00871581
ENSG00000104442-ARMC1	63.2255	-0.841897	0.248421	-3.38899	0.000701513	0.00885428
ENSG00000111142-METAP2	519.793	-0.346771	0.1024	-3.38644	0.000708053	0.00892502
ENSG00000100142-POLR2F	224.019	-0.485964	0.14354	-3.38556	0.000710343	0.00894207
ENSG00000197976-AKAP17A	60.471	0.85922	0.253821	3.38514	0.00071141	0.0089437
ENSG00000067955-CBFB	71.0539	-0.81244	0.240215	-3.38214	0.000719238	0.00901835
ENSG00000100027-YPEL1	47.1586	1.00426	0.296907	3.38239	0.000718575	0.00901835
ENSG00000213430-HSPD1P1	21.6429	-1.46909	0.434428	-3.38168	0.000720447	0.00902165
ENSG00000012048-BRCA1	77.026	-0.77796	0.230193	-3.3796	0.000725924	0.00907833
ENSG00000100129-EIF3L	439.99	0.357918	0.105956	3.378	0.000730145	0.00910177
ENSG00000163655-GMPS	89.2771	-0.73644	0.218023	-3.37781	0.00073066	0.00910177
ENSG00000164134-NAA15	87.6053	-0.71273	0.210991	-3.37801	0.000730117	0.00910177
ENSG00000153094-BCL2L11	20.6847	1.52085	0.450823	3.3735	0.00074219	0.00923335
ENSG00000115241-PPM1G	230.623	-0.466295	0.1383	-3.37162	0.000747265	0.00928438
ENSG00000113569-NUP155	43.0208	-1.05201	0.31224	-3.36922	0.000753812	0.00935354
ENSG00000100714-MTHFD1	152.387	-0.583677	0.173349	-3.36706	0.000759731	0.00940253
ENSG00000170779-CDCA4	32.0013	-1.18833	0.352906	-3.36728	0.000759143	0.00940253
ENSG00000063046-EIF4B	229.537	0.48078	0.142848	3.36567	0.000763574	0.00942565
ENSG00000154016-GRAP	30.4092	1.21887	0.362118	3.36596	0.000762789	0.00942565
ENSG00000267679-EIF5AP2	43.3618	-1.10523	0.329129	-3.35805	0.000784942	0.00967689
ENSG00000170144-HNRNPA3	492.198	-0.39252	0.11699	-3.35516	0.000793192	0.00976598
ENSG00000215252-GOLGA8B	204.462	0.483914	0.144252	3.35465	0.000794644	0.00977125
ENSG00000166275-BORCS7	35.466	1.10964	0.331263	3.34973	0.000808891	0.00993364
ENSG00000111669-TPI1	288.954	-0.428478	0.127996	-3.34759	0.000815167	0.00999784
ENSG00000151835-SACS	41.5825	-1.05429	0.31501	-3.34685	0.000817346	0.0100117
ENSG00000112306-RPS12	2744.57	0.227156	0.0679722	3.3419	0.000832066	0.0101789
ENSG00000161996-WDR90	80.3264	-0.752739	0.225638	-3.33604	0.000849802	0.0103826
ENSG00000176842-IRX5	22.6942	-1.45354	0.43685	-3.32731	0.000876895	0.0106999
ENSG00000122406-RPL5	2871.11	0.220365	0.066237	3.32692	0.00087813	0.0107013
ENSG00000102401-ARMCX3	55.2025	0.943701	0.283848	3.32467	0.000885247	0.0107574
ENSG00000165416-SUGT1	175.599	-0.510897	0.153681	-3.32439	0.000886118	0.0107574
ENSG00000185825-BCAP31	97.7315	-0.6775	0.203789	-3.32452	0.000885718	0.0107574
ENSG00000153207-AHCTF1	76.7112	-0.777323	0.233982	-3.32215	0.000893255	0.0108303
ENSG00000170759-KIF5B	210.854	-0.47135	0.141904	-3.32161	0.000894994	0.0108376
ENSG00000113108-APBB3	27.7753	1.39998	0.421752	3.31945	0.000901942	0.0109036
ENSG00000239672-NME1	190.71	-0.529169	0.159426	-3.31921	0.000902732	0.0109036
ENSG00000204899-MZT1	53.806	-0.904702	0.272941	-3.31465	0.000917595	0.0110691
ENSG00000147526-TACC1	138.43	-0.598795	0.180785	-3.3122	0.000925647	0.0111504
ENSG00000188554-NBR1	64.4727	0.827494	0.249855	3.31189	0.000926669	0.0111504
ENSG00000224631-RPS27AP16	516.238	0.369025	0.111475	3.31037	0.000931741	0.0111973
ENSG00000108654-DDX5	664.445	0.320919	0.096988	3.30885	0.0009368	0.011244
ENSG00000213740-SERBP1P1	37.3826	-1.08661	0.32858	-3.30699	0.000943033	0.0113045
ENSG00000186185-KIF18B	37.7004	-1.09764	0.331991	-3.30624	0.000945564	0.0113207
ENSG00000099800-TIMM13	234.168	-0.451761	0.136678	-3.30529	0.000948786	0.011345
ENSG00000166347-CYB5A	44.5131	-1.03849	0.314386	-3.30323	0.000955775	0.0114143
ENSG00000103995-CEP152	96.4797	-0.68258	0.206684	-3.30252	0.000958192	0.0114288
ENSG00000102900-NUP93	130.185	-0.615366	0.186355	-3.30212	0.000959583	0.0114311
ENSG00000275700-AATF	108.53	-0.6255	0.189639	-3.29838	0.000972458	0.0115701
ENSG00000138031-ADCY3	23.9395	-1.37622	0.417414	-3.297	0.000977227	0.0116123
ENSG00000138160-KIF11	53.2574	-0.923192	0.280049	-3.29654	0.000978828	0.0116169
ENSG00000168298-HIST1H1E	19.1634	-1.69667	0.515938	-3.28852	0.00100716	0.0119308
ENSG00000240409-MTATP8P1	164.267	-0.567742	0.172653	-3.28835	0.00100778	0.0119308
ENSG00000179008-C14orf39	76.3615	-0.805125	0.245039	-3.2857	0.00101729	0.0120065
ENSG00000241360-PDXP	39.3188	-1.08815	0.331196	-3.28552	0.00101795	0.0120065
ENSG00000285304-Z83844.3	39.3188	-1.08815	0.331196	-3.28552	0.00101795	0.0120065
ENSG00000242028-HYPK	217.325	-0.460818	0.140357	-3.2832	0.00102637	0.0120909
ENSG00000142168-SOD1	471.639	-0.336771	0.102627	-3.28151	0.00103252	0.0121332
ENSG00000162613-FUBP1	238.816	-0.539458	0.164405	-3.28127	0.0010334	0.0121332
ENSG00000224578-HNRNPA1P48	178.466	0.530815	0.161776	3.28117	0.00103378	0.0121332
ENSG00000204516-MICB	44.7029	-0.975668	0.297753	-3.27677	0.00105001	0.0123085
ENSG00000145604-SKP2	72.9187	-0.786436	0.240526	-3.26965	0.00107679	0.012607
ENSG00000155016-CYP2U1	23.147	1.40796	0.431084	3.26609	0.00109044	0.0127512
ENSG00000198885-ITPRIPL1	29.0547	-1.33496	0.409081	-3.26332	0.00110116	0.0128608
ENSG00000111196-MAGOHB	45.8163	-0.962908	0.295104	-3.26295	0.0011026	0.0128619
ENSG00000117650-NEK2	34.4926	-1.11604	0.342189	-3.26147	0.00110837	0.0128977
ENSG00000138303-ASCC1	38.7736	1.04925	0.321704	3.26155	0.00110806	0.0128977
ENSG00000189306-RRP7A	68.7753	-0.798243	0.244804	-3.26075	0.00111119	0.0129148
ENSG00000089157-RPLP0	1962.53	0.215855	0.0662637	3.25751	0.00112395	0.01304
ENSG00000106344-RBM28	96.5984	-0.657072	0.201722	-3.25732	0.0011247	0.01304
ENSG00000067533-RRP15	93.1789	-0.690942	0.212186	-3.2563	0.00112873	0.0130708
ENSG00000279738-AL022311.1	446.96	0.342394	0.105166	3.25575	0.00113092	0.0130803
ENSG00000107937-GTPBP4	149.986	-0.547655	0.168315	-3.25376	0.00113888	0.0131564
ENSG00000118193-KIF14	95.8635	-0.766939	0.235901	-3.2511	0.0011496	0.0132481
ENSG00000160049-DFFA	91.6685	-0.70897	0.218051	-3.2514	0.00114838	0.0132481
ENSG00000079277-MKNK1	45.1108	1.02711	0.316065	3.24966	0.00115543	0.0132993
ENSG00000089280-FUS	632.055	-0.301413	0.0927653	-3.24921	0.00115727	0.0133045
ENSG00000255872-AL138752.2	130.787	-0.568328	0.175073	-3.24623	0.00116945	0.0134283
ENSG00000183648-NDUFB1	257.472	0.418374	0.128919	3.24525	0.00117347	0.0134583
ENSG00000178921-PFAS	53.2464	-0.910728	0.280767	-3.24371	0.00117984	0.013515
ENSG00000106605-BLVRA	58.4921	0.867341	0.267486	3.24256	0.00118459	0.0135532
ENSG00000166788-SAAL1	46.4949	-0.953279	0.294371	-3.23836	0.00120218	0.0137216
ENSG00000225630-MTND2P28	1275.7	-0.305993	0.094486	-3.23851	0.00120158	0.0137216
ENSG00000184661-CDCA2	39.0802	-1.05561	0.326307	-3.23501	0.00121639	0.0138671
ENSG00000071626-DAZAP1	565.877	-0.310937	0.0961576	-3.23362	0.0012223	0.0139179
ENSG00000127804-METTL16	48.9036	-0.910388	0.281671	-3.2321	0.00122884	0.0139591
ENSG00000213551-DNAJC9	70.5148	-0.802392	0.248236	-3.23237	0.00122768	0.0139591
ENSG00000111203-ITFG2	67.1421	-0.862214	0.266844	-3.23115	0.00123292	0.0139828
ENSG00000169288-MRPL1	81.6473	-0.714997	0.221297	-3.23093	0.00123386	0.0139828
ENSG00000128708-HAT1	61.4986	-0.91828	0.284706	-3.22536	0.00125814	0.0142241
ENSG00000237039-AC018738.1	134.159	0.589597	0.182787	3.2256	0.00125711	0.0142241
ENSG00000109519-GRPEL1	80.2341	-0.743414	0.230558	-3.22442	0.00126229	0.0142542
ENSG00000130023-ERMARD	32.3387	1.20365	0.373517	3.22248	0.00127084	0.0143338
ENSG00000154889-MPPE1	32.6387	1.13844	0.353419	3.22122	0.00127645	0.0143801
ENSG00000033627-ATP6V0A1	33.751	1.13134	0.351257	3.22082	0.00127826	0.0143835
ENSG00000178977-LINC00324	24.9447	-1.33392	0.414269	-3.21994	0.0012822	0.0144107
ENSG00000186660-ZFP91	191.108	-0.477838	0.148429	-3.21931	0.00128499	0.0144251
ENSG00000160298-C21orf58	38.1336	-1.03349	0.321074	-3.21884	0.0012871	0.0144318
ENSG00000116478-HDAC1	327.871	-0.387468	0.120446	-3.21694	0.00129564	0.0145105
ENSG00000250802-ZBED3-AS1	19.6745	1.53507	0.477327	3.21597	0.00130006	0.0145429
ENSG00000111665-CDCA3	31.1766	-1.18751	0.369502	-3.21382	0.00130984	0.0146332
ENSG00000251503-CENPS-CORT	46.6984	-0.991777	0.308627	-3.21352	0.00131119	0.0146332
ENSG00000047346-FAM214A	27.016	1.25146	0.389705	3.2113	0.00132134	0.0147293
ENSG00000169136-ATF5	46.2032	-0.939143	0.29253	-3.21041	0.00132544	0.0147577
ENSG00000253626-EIF5AL1	91.3413	-0.820654	0.255747	-3.20885	0.00133267	0.0148209
ENSG00000079616-KIF22	94.8395	-0.66632	0.207688	-3.20828	0.00133532	0.0148331
ENSG00000158050-DUSP2	68.6571	0.784673	0.244822	3.20508	0.00135027	0.0149817
ENSG00000239779-WBP1	33.9474	1.07263	0.334762	3.20416	0.00135457	0.015012
ENSG00000168675-LDLRAD4	185.099	0.473747	0.14795	3.20209	0.00136437	0.015103
ENSG00000139112-GABARAPL1	28.1379	1.22194	0.381899	3.19962	0.00137607	0.0152149
ENSG00000105877-DNAH11	62.4025	-0.82128	0.256884	-3.19708	0.00138824	0.015314
ENSG00000267694-AP005131.5	21.0001	1.3881	0.434166	3.19717	0.00138783	0.015314
ENSG00000227507-LTB	75.0054	-0.758826	0.237807	-3.19093	0.00141815	0.0156259
ENSG00000210077-MT-TV	81.1505	0.712762	0.223563	3.1882	0.00143163	0.0157562
ENSG00000236656-AL365440.2	38.5449	1.07397	0.336961	3.18722	0.00143648	0.0157913
ENSG00000164209-SLC25A46	67.6013	0.803598	0.252176	3.18665	0.00143929	0.015804
ENSG00000284491-THSD8	68.7536	-0.810344	0.254331	-3.18618	0.00144163	0.0158116
ENSG00000139990-DCAF5	119.447	0.595656	0.187129	3.18313	0.00145691	0.0159608
ENSG00000131508-UBE2D2	312.666	-0.379892	0.119383	-3.18214	0.00146192	0.0159973
ENSG00000267503-AP005131.3	17.3228	1.54285	0.485642	3.17692	0.00148847	0.0162692
ENSG00000111602-TIMELESS	66.9226	-0.777686	0.244916	-3.17531	0.00149675	0.0163409
ENSG00000144224-UBXN4	489.453	0.322652	0.101787	3.16987	0.00152509	0.0166313
ENSG00000157193-LRP8	73.6606	-0.750159	0.2367	-3.16924	0.00152836	0.0166479
ENSG00000104889-RNASEH2A	76.0334	-0.785289	0.24787	-3.16815	0.00153411	0.0166915
ENSG00000135698-MPHOSPH6	143.491	-0.544656	0.171987	-3.16684	0.00154104	0.0167478
ENSG00000117632-STMN1	1090.33	-0.267579	0.0845288	-3.16554	0.00154796	0.0168039
ENSG00000136450-SRSF1	294.565	-0.402952	0.127326	-3.16473	0.00155227	0.0168315
ENSG00000104687-GSR	64.6398	0.791423	0.250153	3.16376	0.00155744	0.0168685
ENSG00000104147-OIP5	50.6647	-0.889188	0.281201	-3.16211	0.00156631	0.0169225
ENSG00000132128-LRRC41	121.388	-0.602928	0.190669	-3.16218	0.00156593	0.0169225
ENSG00000140941-MAP1LC3B	76.4448	0.730332	0.230983	3.16184	0.00156775	0.0169225
ENSG00000264229-RNU4ATAC	47.4467	0.93146	0.294858	3.15901	0.00158307	0.0170685
ENSG00000142230-SAE1	193.202	-0.482244	0.152676	-3.15862	0.0015852	0.0170722
ENSG00000226360-RPL10AP6	205.894	0.471896	0.149488	3.15676	0.00159535	0.0171622
ENSG00000005483-KMT2E	474.983	0.336958	0.106778	3.15569	0.00160117	0.0172054
ENSG00000160957-RECQL4	31.9635	-1.19505	0.378777	-3.15501	0.00160491	0.0172261
ENSG00000251474-RPL32P3	30.1742	1.12946	0.358271	3.15252	0.00161869	0.0173545
ENSG00000176974-SHMT1	67.9005	-0.771173	0.244743	-3.15095	0.00162743	0.0174286
ENSG00000048162-NOP16	101.984	-0.624825	0.198368	-3.14983	0.00163364	0.0174755
ENSG00000265784-AC006441.3	341.593	0.379608	0.120535	3.14936	0.00163629	0.0174843
ENSG00000155189-AGPAT5	73.7248	-0.747554	0.23742	-3.14865	0.00164025	0.017507
ENSG00000234222-LIX1L-AS1	101.538	-0.659578	0.209603	-3.14679	0.00165071	0.0175989
ENSG00000145214-DGKQ	31.2171	1.12253	0.356827	3.14586	0.00165598	0.0176354
ENSG00000124097-HMGB1P1	136.213	-0.54107	0.172035	-3.14511	0.00166023	0.017661
ENSG00000001461-NIPAL3	42.0307	0.987734	0.314177	3.14387	0.00166727	0.0177161
ENSG00000151849-CENPJ	88.3691	-0.656996	0.209165	-3.14104	0.00168347	0.0178684
ENSG00000138658-ZGRF1	56.4043	-0.851633	0.271252	-3.13964	0.00169157	0.0179344
ENSG00000164687-FABP5	63.9048	-0.776222	0.247502	-3.13623	0.00171134	0.0181239
ENSG00000172053-QARS	197.124	0.500855	0.159769	3.13488	0.00171927	0.0181876
ENSG00000255276-RRM1-AS1	38.4318	-1.01053	0.322744	-3.13106	0.00174175	0.018405
ENSG00000072110-ACTN1	73.9466	-0.742571	0.237212	-3.13041	0.0017456	0.0184254
ENSG00000284803-AC245033.4	1120.37	0.297883	0.0952218	3.1283	0.00175818	0.0185377
ENSG00000258427-RBM8B	122.764	-0.572897	0.183275	-3.1259	0.00177265	0.0186695
ENSG00000112081-SRSF3	553.374	-0.300321	0.0961152	-3.12459	0.0017805	0.0186904
ENSG00000123395-ATG101	103.499	0.610249	0.195298	3.12471	0.0017798	0.0186904
ENSG00000141232-TOB1	14.7982	1.64981	0.527906	3.12521	0.00177681	0.0186904
ENSG00000116670-MAD2L2	108.234	-0.620293	0.198611	-3.12315	0.00178924	0.0187615
ENSG00000177954-RPS27	1290.38	0.598735	0.191795	3.12175	0.00179782	0.0188279
ENSG00000237945-LINC00649	52.5028	0.850842	0.272578	3.12147	0.00179952	0.0188279
ENSG00000257663-AC025259.1	103.064	0.609246	0.195348	3.11878	0.00181603	0.0189798
ENSG00000284526-AC015802.6	176.144	-0.510616	0.163974	-3.114	0.00184572	0.019269
ENSG00000203875-SNHG5	81.656	0.718644	0.230972	3.11139	0.00186206	0.0194184
ENSG00000128245-YWHAH	84.3856	-0.709216	0.228049	-3.10993	0.0018713	0.0194509
ENSG00000135916-ITM2C	254.899	0.451649	0.145227	3.10995	0.0018712	0.0194509
ENSG00000197921-HES5	152.505	-0.520018	0.167189	-3.11036	0.00186858	0.0194509
ENSG00000101596-SMCHD1	151.399	-0.539446	0.173525	-3.10875	0.00187881	0.0195078
ENSG00000143119-CD53	39.8259	0.960403	0.309119	3.10691	0.00189056	0.0196084
ENSG00000166887-VPS39	22.6001	1.33391	0.429537	3.10545	0.00189988	0.0196837
ENSG00000106105-GARS	201.43	-0.443525	0.142849	-3.10485	0.00190379	0.0197027
ENSG00000149636-DSN1	63.4732	-0.79316	0.255894	-3.09956	0.00193808	0.020036
ENSG00000002834-LASP1	354.866	0.359856	0.116249	3.09557	0.00196435	0.0202636
ENSG00000152495-CAMK4	86.0673	0.721545	0.233079	3.09571	0.00196339	0.0202636
ENSG00000213741-RPS29	7748.56	0.202976	0.0655947	3.0944	0.0019721	0.0203216
ENSG00000121579-NAA50	79.9779	-0.708604	0.229038	-3.09382	0.00197594	0.0203277
ENSG00000138092-CENPO	51.2479	-0.862071	0.278656	-3.09367	0.00197695	0.0203277
ENSG00000138468-SENP7	48.8088	0.872433	0.28211	3.09252	0.00198463	0.0203846
ENSG00000070423-RNF126	142.684	-0.604005	0.195338	-3.0921	0.00198744	0.0203916
ENSG00000166432-ZMAT1	60.409	0.777168	0.251566	3.08931	0.00200619	0.0205618
ENSG00000146909-NOM1	73.6749	-0.701899	0.227394	-3.08671	0.00202385	0.0207206
ENSG00000070761-CFAP20	64.5384	-0.752315	0.243994	-3.08334	0.00204692	0.0209343
ENSG00000183576-SETD3	65.2408	-0.75465	0.245128	-3.0786	0.00207976	0.0212474
ENSG00000150787-PTS	29.5982	-1.24887	0.405852	-3.07715	0.00208992	0.0213284
ENSG00000206053-JPT2	92.9948	-0.641981	0.208682	-3.07636	0.00209545	0.0213619
ENSG00000136861-CDK5RAP2	70.5053	-0.743406	0.241744	-3.07518	0.00210375	0.0214236
ENSG00000097046-CDC7	40.4792	-0.942293	0.306655	-3.07281	0.00212053	0.0215485
ENSG00000175768-TOMM5	145.348	-0.511813	0.166554	-3.07295	0.00211957	0.0215485
ENSG00000067445-TRO	43.1147	0.955709	0.3112	3.07105	0.00213308	0.0216531
ENSG00000108107-RPL28	834.076	0.334579	0.108979	3.07013	0.00213965	0.0216966
ENSG00000285016-AC017002.6	46.9617	0.875729	0.28531	3.0694	0.0021449	0.0217268
ENSG00000117877-CD3EAP	62.7647	-0.807957	0.263473	-3.06657	0.00216534	0.0219105
ENSG00000185650-ZFP36L1	168.851	0.512766	0.167324	3.06451	0.00218025	0.0220381
ENSG00000141404-GNAL	23.3063	1.3449	0.43943	3.06057	0.0022092	0.022307
ENSG00000250471-GMPSP1	31.5939	-1.07455	0.351526	-3.05681	0.00223702	0.0225641
ENSG00000227077-AC107983.1	140.169	0.557997	0.182648	3.05504	0.00225027	0.0226738
ENSG00000112242-E2F3	119.756	-0.598605	0.196057	-3.05323	0.00226395	0.0227636
ENSG00000137970-RPL7P9	235.558	0.423343	0.138646	3.05342	0.00226249	0.0227636
ENSG00000205339-IPO7	132.012	-0.579501	0.189942	-3.05094	0.00228129	0.0229138
ENSG00000284681-AC007240.1	18.742	-1.50135	0.492291	-3.04973	0.00229051	0.0229822
ENSG00000185222-TCEAL9	96.4942	-0.628923	0.206267	-3.04907	0.0022955	0.0229896
ENSG00000185641-AC034236.1	273.163	0.412497	0.135289	3.049	0.00229606	0.0229896
ENSG00000197102-DYNC1H1	288.623	0.403323	0.132313	3.04825	0.00230176	0.0230224
ENSG00000051596-THOC3	79.1729	-0.705544	0.231544	-3.04713	0.00231041	0.0230788
ENSG00000065978-YBX1	1293.12	-0.596114	0.195647	-3.04689	0.00231223	0.0230788
ENSG00000170549-IRX1	101.25	-0.60139	0.197471	-3.04546	0.00232324	0.0231644
ENSG00000186468-RPS23	4158.24	0.215202	0.0707703	3.04085	0.0023591	0.0234974
ENSG00000163597-SNHG16	198.536	-0.463585	0.152501	-3.03988	0.00236673	0.0235488
ENSG00000214391-TUBAP2	80.1689	-0.66823	0.219949	-3.03812	0.00238062	0.0236623
ENSG00000138036-DYNC2LI1	20.181	1.35364	0.445837	3.03619	0.00239592	0.0237896
ENSG00000233426-EIF3FP3	21.3941	1.4328	0.472279	3.0338	0.00241497	0.0239539
ENSG00000101546-RBFA	41.0929	-0.939256	0.309853	-3.03129	0.00243507	0.0241282
ENSG00000068024-HDAC4	133.148	0.570415	0.188424	3.0273	0.0024675	0.0243905
ENSG00000126088-UROD	46.1526	0.872132	0.288109	3.02709	0.00246921	0.0243905
ENSG00000140332-TLE3	67.648	-0.765554	0.252867	-3.0275	0.00246589	0.0243905
ENSG00000182481-KPNA2	184.045	-0.46184	0.152784	-3.02282	0.00250431	0.0247116
ENSG00000154719-MRPL39	38.1232	-1.0341	0.342411	-3.02004	0.00252739	0.0249136
ENSG00000105281-SLC1A5	32.0246	-1.07734	0.35677	-3.01971	0.00253017	0.0249153
ENSG00000205744-DENND1C	26.1224	1.19667	0.396361	3.01913	0.00253498	0.0249369
ENSG00000113013-HSPA9	212.077	-0.426701	0.141355	-3.01865	0.00253906	0.0249512
ENSG00000161547-SRSF2	431.019	-0.339963	0.112645	-3.018	0.0025445	0.024979
ENSG00000205581-HMGN1	441.134	-0.326732	0.108299	-3.01694	0.00255337	0.0250404
ENSG00000167302-TEPSIN	40.6343	0.996222	0.330382	3.01537	0.00256669	0.0251451
ENSG00000105993-DNAJB6	160.894	-0.481115	0.159649	-3.01358	0.00258185	0.0252486
ENSG00000135521-LTV1	169.223	-0.490113	0.162649	-3.01332	0.00258405	0.0252486
ENSG00000141562-NARF	67.5653	0.742895	0.246548	3.01319	0.00258519	0.0252486
ENSG00000064393-HIPK2	57.5023	0.781662	0.259599	3.01103	0.0026036	0.0254024
ENSG00000083312-TNPO1	146.703	-0.497006	0.165144	-3.00953	0.00261656	0.0255028
ENSG00000188529-SRSF10	505.725	0.320605	0.106588	3.0079	0.00263063	0.0255892
ENSG00000204568-MRPS18B	157.094	-0.488822	0.162531	-3.00757	0.00263347	0.0255892
ENSG00000269220-LINC00528	22.9676	1.41878	0.471722	3.00767	0.00263258	0.0255892
ENSG00000165501-LRR1	76.8828	-0.726623	0.241889	-3.00396	0.00266494	0.0258686
ENSG00000171612-SLC25A33	37.9171	-0.989054	0.329632	-3.00048	0.00269554	0.026139
ENSG00000137656-BUD13	34.8409	-1.04282	0.348	-2.9966	0.00273011	0.0264474
ENSG00000085999-RAD54L	91.049	-0.660705	0.220559	-2.99559	0.00273912	0.0264909
ENSG00000166963-MAP1A	475.383	0.308475	0.10298	2.99548	0.00274016	0.0264909
ENSG00000161888-SPC24	26.342	-1.14599	0.382922	-2.99275	0.0027648	0.0267022
ENSG00000140525-FANCI	174.599	-0.476111	0.159113	-2.99228	0.00276902	0.0267159
ENSG00000168061-SAC3D1	62.669	-0.802194	0.268212	-2.9909	0.00278156	0.0268097
ENSG00000067334-DNTTIP2	149.277	-0.487999	0.163267	-2.98897	0.0027992	0.0269525
ENSG00000225178-RPSAP58	156.791	0.539966	0.180742	2.9875	0.00281268	0.0270551
ENSG00000243279-PRAF2	22.3991	1.27905	0.428346	2.98601	0.00282641	0.0271597
ENSG00000111540-RAB5B	51.4952	0.840008	0.281494	2.98411	0.00284406	0.0273019
ENSG00000169100-SLC25A6	326.703	0.391576	0.131301	2.98229	0.00286104	0.0274373
ENSG00000123545-NDUFAF4	30.866	-1.13049	0.379228	-2.98102	0.00287288	0.0275232
ENSG00000128284-APOL3	13.4874	1.66931	0.560574	2.97785	0.00290275	0.0277814
ENSG00000160613-PCSK7	76.5918	0.66967	0.225262	2.97285	0.00295053	0.0282104
ENSG00000126005-MMP24OS	21.4923	1.32259	0.445244	2.97048	0.00297338	0.0284004
ENSG00000010292-NCAPD2	115.581	-0.553145	0.186441	-2.96686	0.00300863	0.0287083
ENSG00000124177-CHD6	52.687	0.869537	0.293219	2.96548	0.00302208	0.0288079
ENSG00000126787-DLGAP5	51.2402	-0.813346	0.274402	-2.96407	0.00303604	0.0289121
ENSG00000168411-RFWD3	83.209	-0.692673	0.233772	-2.96303	0.00304631	0.028981
ENSG00000198743-SLC5A3	74.5927	0.671334	0.227053	2.95673	0.00310918	0.0295496
ENSG00000109756-RAPGEF2	29.7135	1.12108	0.379298	2.95567	0.00311989	0.0296219
ENSG00000005302-MSL3	63.1096	0.750481	0.254061	2.95394	0.00313744	0.0297589
ENSG00000054282-SDCCAG8	64.95	0.726364	0.24618	2.95054	0.00317219	0.0299693
ENSG00000105576-TNPO2	116.818	-0.567737	0.192406	-2.95072	0.00317033	0.0299693
ENSG00000108474-PIGL	103.076	-0.614097	0.208114	-2.95078	0.00316976	0.0299693
ENSG00000215908-CROCCP2	40.3432	0.937369	0.317632	2.95112	0.00316624	0.0299693
ENSG00000213337-ANKRD39	56.2631	-0.780263	0.264609	-2.94874	0.00319077	0.030115
ENSG00000134308-YWHAQ	469.261	-0.311815	0.105795	-2.94735	0.00320512	0.0302206
ENSG00000138363-ATIC	221.859	-0.405891	0.137751	-2.94655	0.0032134	0.0302687
ENSG00000205544-TMEM256	40.6873	0.953897	0.323883	2.94519	0.00322758	0.0303724
ENSG00000139684-ESD	168.719	-0.499425	0.169665	-2.9436	0.00324421	0.0304988
ENSG00000196262-PPIA	2436.93	-0.218475	0.0742993	-2.94047	0.00327719	0.0307785
ENSG00000279281-AC015883.1	35.2939	1.01379	0.345055	2.93806	0.0033027	0.0309875
ENSG00000152217-SETBP1	22.2849	-1.27679	0.434641	-2.93758	0.00330787	0.0310056
ENSG00000166681-BEX3	489.552	0.320322	0.109125	2.93536	0.00333158	0.0311972
ENSG00000234589-AC125807.1	231.803	0.463149	0.157881	2.93354	0.00335125	0.0313506
ENSG00000219665-ZNF433-AS1	34.2725	0.984457	0.335756	2.93206	0.00336726	0.0314695
ENSG00000228451-SDAD1P1	17.2816	1.42509	0.487362	2.9241	0.00345452	0.0322535
ENSG00000136699-SMPD4	176.889	-0.503264	0.172259	-2.92154	0.003483	0.0324732
ENSG00000213024-NUP62	105.34	-0.580656	0.198761	-2.92138	0.00348487	0.0324732
ENSG00000130724-CHMP2A	85.4932	0.653193	0.223917	2.91712	0.00353275	0.0328873
ENSG00000031691-CENPQ	48.49	-0.886483	0.303947	-2.91657	0.00353907	0.032914
ENSG00000124802-EEF1E1	48.3478	-0.855711	0.293483	-2.91571	0.00354876	0.0329721
ENSG00000168010-ATG16L2	87.6565	0.620303	0.212849	2.91429	0.00356502	0.0330909
ENSG00000148400-NOTCH1	599.984	0.286931	0.0984913	2.91326	0.00357672	0.0331672
ENSG00000109046-WSB1	165.216	0.472353	0.162179	2.91253	0.00358509	0.0332125
ENSG00000138760-SCARB2	20.2126	1.29345	0.444286	2.91129	0.0035994	0.0333016
ENSG00000248508-SRP14-AS1	19.9893	1.31809	0.452781	2.91109	0.00360168	0.0333016
ENSG00000218175-AC016739.1	356.528	0.330958	0.113785	2.90864	0.00363005	0.0335314
ENSG00000163945-UVSSA	53.0163	0.783581	0.269435	2.90824	0.00363468	0.0335417
ENSG00000178464-RPL10P16	147.65	0.486594	0.167496	2.90512	0.00367116	0.0338456
ENSG00000155380-SLC16A1	177.237	-0.443222	0.152632	-2.90385	0.003686	0.0339496
ENSG00000123219-CENPK	43.3594	-0.882148	0.304117	-2.90069	0.00372347	0.0341629
ENSG00000182378-PLCXD1	32.9901	-0.988285	0.340665	-2.90104	0.00371921	0.0341629
ENSG00000218426-AL590867.2	295.048	0.357222	0.123132	2.90113	0.00371818	0.0341629
ENSG00000269228-RPS27AP19	214.625	0.454633	0.156727	2.90079	0.00372221	0.0341629
ENSG00000108406-DHX40	88.6341	0.633256	0.218446	2.89892	0.00374453	0.034292
ENSG00000163817-SLC6A20	16.3152	1.4441	0.498154	2.8989	0.00374474	0.034292
ENSG00000263513-FAM72C	22.4157	-1.21769	0.420148	-2.89824	0.00375266	0.0343316
ENSG00000124172-ATP5F1E	1114.55	0.22142	0.0764477	2.89635	0.00377526	0.0345053
ENSG00000139726-DENR	123.559	-0.520007	0.1796	-2.89535	0.00378731	0.0345823
ENSG00000174748-RPL15	1168.81	0.222213	0.0767881	2.89384	0.00380561	0.0347162
ENSG00000134884-ARGLU1	495.893	0.299914	0.103683	2.8926	0.00382069	0.0348205
ENSG00000123338-NCKAP1L	124.576	0.57651	0.199364	2.89174	0.00383113	0.0348823
ENSG00000148840-PPRC1	33.7992	-1.01391	0.350659	-2.89143	0.00383489	0.0348833
ENSG00000090621-PABPC4	419.206	-0.337356	0.116703	-2.89072	0.00384356	0.0349288
ENSG00000100401-RANGAP1	107.599	-0.595293	0.205996	-2.88983	0.00385456	0.0349954
ENSG00000170542-SERPINB9	36.1609	0.948189	0.328278	2.88837	0.00387243	0.0351243
ENSG00000074370-ATP2A3	97.9494	0.591486	0.204932	2.88625	0.00389864	0.0353284
ENSG00000197448-GSTK1	70.2961	0.684988	0.237353	2.88594	0.00390244	0.0353293
ENSG00000033100-CHPF2	44.6635	0.853555	0.296239	2.88131	0.00396027	0.0358189
ENSG00000102547-CAB39L	38.2438	-0.929489	0.323096	-2.87682	0.00401704	0.0362979
ENSG00000163964-PIGX	60.7362	-0.743792	0.258712	-2.87498	0.00404049	0.0364753
ENSG00000064419-TNPO3	137.325	-0.51179	0.178402	-2.86875	0.00412096	0.0371447
ENSG00000141030-COPS3	169.046	-0.442097	0.154114	-2.86864	0.00412244	0.0371447
ENSG00000166888-STAT6	58.4223	0.7415	0.258538	2.86805	0.0041301	0.0371787
ENSG00000136045-PWP1	159.688	-0.461373	0.161	-2.86566	0.00416135	0.0374247
ENSG00000165119-HNRNPK	1185.96	-0.223609	0.0780387	-2.86536	0.00416536	0.0374255
ENSG00000141682-PMAIP1	58.2864	-0.752386	0.262608	-2.86505	0.00416939	0.0374264
ENSG00000157456-CCNB2	153.815	-0.487962	0.170447	-2.86284	0.00419857	0.0376176
ENSG00000255152-MSH5-SAPCD1	54.1967	-0.822863	0.287418	-2.86295	0.00419714	0.0376176
ENSG00000113141-IK	326.85	0.357974	0.125201	2.8592	0.00424715	0.0380172
ENSG00000256238-SUPT16HP1	35.3378	-0.948849	0.332042	-2.85761	0.00426839	0.0381715
ENSG00000160752-FDPS	167.478	-0.450225	0.157569	-2.85731	0.00427248	0.0381722
ENSG00000189159-JPT1	266.626	-0.374947	0.131282	-2.85604	0.0042896	0.0382894
ENSG00000212907-MT-ND4L	848.941	-0.284083	0.0994799	-2.85568	0.00429452	0.0382975
ENSG00000070756-PABPC1	2728.49	-0.252186	0.088323	-2.85527	0.00430007	0.0383112
ENSG00000181350-LRRC75A	532.767	0.309842	0.108685	2.85083	0.00436057	0.0388139
ENSG00000131779-PEX11B	41.9276	0.900502	0.315999	2.8497	0.00437607	0.0389157
ENSG00000111581-NUP107	79.6776	-0.639509	0.224478	-2.84887	0.00438743	0.0389566
ENSG00000167747-C19orf48	49.9689	-0.809902	0.284299	-2.84877	0.00438885	0.0389566
ENSG00000102974-CTCF	207.224	-0.409427	0.143804	-2.84711	0.00441175	0.0391235
ENSG00000266412-NCOA4	86.2358	0.618787	0.217369	2.84671	0.00441736	0.0391369
ENSG00000164609-SLU7	161.096	0.454895	0.159913	2.84464	0.00444622	0.039356
ENSG00000125257-ABCC4	15.4091	-1.57089	0.552462	-2.84343	0.00446313	0.0394691
ENSG00000173221-GLRX	49.3348	0.840463	0.295783	2.84149	0.00449037	0.0396733
ENSG00000100811-YY1	241.396	-0.389649	0.137268	-2.83859	0.00453134	0.0398141
ENSG00000116221-MRPL37	154.314	-0.470909	0.165824	-2.83982	0.0045139	0.0398141
ENSG00000153029-MR1	36.7857	1.01233	0.356614	2.83872	0.00452951	0.0398141
ENSG00000185658-BRWD1	105.592	0.595438	0.209753	2.83876	0.00452893	0.0398141
ENSG00000229119-AC026403.1	397.14	0.342547	0.120632	2.83962	0.00451678	0.0398141
ENSG00000233966-UBE2SP1	34.6373	-0.949706	0.334485	-2.83931	0.00452111	0.0398141
ENSG00000204463-BAG6	83.0124	-0.611955	0.215902	-2.83442	0.00459093	0.0403005
ENSG00000105197-TIMM50	94.613	-0.601329	0.21222	-2.83352	0.00460389	0.0403771
ENSG00000081870-HSPB11	89.6505	-0.603148	0.213009	-2.83157	0.00463207	0.040587
ENSG00000180776-ZDHHC20	35.3671	-0.932607	0.329457	-2.83074	0.00464405	0.0406546
ENSG00000143882-ATP6V1C2	179.819	-0.43245	0.153005	-2.82638	0.00470776	0.0411746
ENSG00000257151-PWAR6	23.9261	1.1401	0.403548	2.8252	0.00472516	0.0412889
ENSG00000130726-TRIM28	154.585	-0.483269	0.171298	-2.82121	0.00478425	0.0417669
ENSG00000139644-TMBIM6	357.797	-0.321398	0.114	-2.81927	0.00481323	0.0419816
ENSG00000237649-KIFC1	58.2565	-0.723677	0.256781	-2.81827	0.00482835	0.042075
ENSG00000011260-UTP18	71.6651	-0.672385	0.238662	-2.81731	0.00484281	0.0421625
ENSG00000074181-NOTCH3	233.482	0.424543	0.151214	2.80757	0.00499174	0.0434195
ENSG00000168259-DNAJC7	217.202	-0.451708	0.161121	-2.80353	0.00505467	0.0439268
ENSG00000158321-AUTS2	76.1638	0.651347	0.232438	2.80224	0.00507489	0.0440624
ENSG00000223642-AC008277.1	33.6988	1.06286	0.379592	2.80001	0.00511012	0.044328
ENSG00000122034-GTF3A	268.815	-0.368921	0.131801	-2.79907	0.00512503	0.0444169
ENSG00000169180-XPO6	116.373	-0.535771	0.191437	-2.79869	0.00513111	0.0444293
ENSG00000164182-NDUFAF2	55.7881	-0.732695	0.261932	-2.79728	0.00515355	0.0445728
ENSG00000242372-EIF6	141.692	-0.50292	0.179803	-2.79706	0.00515703	0.0445728
ENSG00000204438-GPANK1	64.2706	-0.726552	0.259976	-2.79469	0.00519489	0.0448594
ENSG00000163002-NUP35	30.1476	-1.05012	0.375812	-2.79427	0.00520171	0.0448777
ENSG00000003402-CFLAR	44.0396	0.869773	0.311511	2.79211	0.00523651	0.0451371
ENSG00000110172-CHORDC1	79.096	-0.633596	0.22709	-2.79007	0.0052697	0.0453413
ENSG00000123473-STIL	36.5044	-0.979077	0.350899	-2.7902	0.00526761	0.0453413
ENSG00000113721-PDGFRB	172.006	0.476796	0.170921	2.78958	0.00527772	0.0453694
ENSG00000166411-IDH3A	185.459	-0.422368	0.151467	-2.78852	0.00529499	0.0454411
ENSG00000215559-ANKRD20A11P	68.8739	-0.722183	0.258988	-2.78848	0.00529558	0.0454411
ENSG00000141867-BRD4	321.635	-0.347653	0.124854	-2.78448	0.00536132	0.0459225
ENSG00000213080-AL354714.2	15.6676	-1.52777	0.548667	-2.78451	0.00536079	0.0459225
ENSG00000160654-CD3G	896.127	-0.248811	0.0893978	-2.78318	0.00538283	0.0460654
ENSG00000123989-CHPF	15.0851	1.48527	0.533821	2.78234	0.00539692	0.0461447
ENSG00000115163-CENPA	32.3247	-1.13097	0.406638	-2.78126	0.00541478	0.0462559
ENSG00000273749-CYFIP1	121.126	0.50883	0.183009	2.78035	0.00542995	0.046344
ENSG00000258725-PRC1-AS1	40.9363	-0.925895	0.333141	-2.77928	0.00544788	0.0464555
ENSG00000148444-COMMD3	74.9983	0.693045	0.249418	2.77865	0.00545857	0.0465051
ENSG00000135451-TROAP	34.5026	-0.991172	0.356984	-2.77652	0.00549446	0.0467274
ENSG00000138758-40787	64.7515	-0.689142	0.248194	-2.77663	0.00549256	0.0467274
ENSG00000198498-TMA16	293.498	-0.342818	0.123492	-2.77604	0.00550252	0.0467542
ENSG00000175097-RAG2	40.4344	0.900581	0.324868	2.77214	0.00556886	0.0472758
ENSG00000117614-SYF2	148.633	0.461197	0.16646	2.77063	0.00559488	0.0473012
ENSG00000135245-HILPDA	25.4228	-1.0947	0.395071	-2.7709	0.00559009	0.0473012
ENSG00000213171-LINGO4	22.5604	1.17142	0.422666	2.77151	0.00557969	0.0473012
ENSG00000280143-AP000892.3	34.2738	1.00791	0.363715	2.77117	0.00558555	0.0473012
ENSG00000285827-AP001267.5	537.187	-0.279697	0.100954	-2.77052	0.00559664	0.0473012
ENSG00000196504-PRPF40A	650.631	-0.255319	0.0921737	-2.76997	0.00560609	0.0473392
ENSG00000221823-PPP3R1	88.4579	-0.639008	0.230769	-2.76904	0.00562211	0.0474325
ENSG00000169047-IRS1	33.9398	0.967654	0.349579	2.76805	0.00563924	0.0475159
ENSG00000178538-CA8	34.4135	-0.933443	0.337264	-2.76769	0.00564547	0.0475159
ENSG00000240036-AC104563.1	128.165	0.503165	0.181805	2.76761	0.00564693	0.0475159
ENSG00000267059-AC005943.1	184.343	0.421937	0.152539	2.76609	0.00567334	0.047696
ENSG00000074356-NCBP3	154.099	0.48458	0.175403	2.76267	0.0057331	0.048156
ENSG00000135913-USP37	61.2762	-0.697317	0.252619	-2.76035	0.00577389	0.048456
ENSG00000261236-BOP1	72.2278	-0.660166	0.239396	-2.75764	0.00582209	0.0488176
ENSG00000135968-GCC2	167.529	0.451455	0.163786	2.75638	0.00584454	0.0489628
ENSG00000087157-PGS1	25.0185	1.10522	0.401041	2.75588	0.00585353	0.0489951
ENSG00000258153-HSPE1P4	56.9298	-0.746786	0.271068	-2.75498	0.00586963	0.0490868
ENSG00000088305-DNMT3B	22.5031	-1.15595	0.419642	-2.75461	0.00587615	0.0490982
ENSG00000197989-SNHG12	79.5038	-0.617329	0.224288	-2.7524	0.00591611	0.0493889
ENSG00000130517-PGPEP1	49.7393	0.77527	0.281841	2.75074	0.00594608	0.0495957
ENSG00000082515-MRPL22	108.577	-0.544315	0.197964	-2.74956	0.00596754	0.0497312
ENSG00000242088-AC090602.1	39.8902	0.846316	0.307849	2.74913	0.00597535	0.0497529
ENSG00000186501-TMEM222	16.1662	-1.38143	0.502575	-2.7487	0.0059833	0.0497756
ENSG00000147050-KDM6A	28.2162	1.06985	0.389343	2.74784	0.00599901	0.0498629
ENSG00000116455-WDR77	64.2725	-0.685382	0.249549	-2.74648	0.00602382	0.0500255
ENSG00000139793-MBNL2	16.0707	1.44959	0.528267	2.74404	0.00606872	0.0502447
ENSG00000145349-CAMK2D	15.7884	1.42889	0.520751	2.74391	0.00607128	0.0502447
ENSG00000164919-COX6C	927.137	0.24138	0.0879557	2.74433	0.00606339	0.0502447
ENSG00000240759-RPS27P21	58.2945	0.694635	0.253134	2.74414	0.00606697	0.0502447
ENSG00000250479-CHCHD10	89.9502	-0.572735	0.208767	-2.74341	0.00608046	0.0502771
ENSG00000135241-PNPLA8	42.1233	0.948497	0.345827	2.74269	0.00609376	0.0503435
ENSG00000065268-WDR18	100.785	-0.550509	0.200799	-2.74159	0.00611426	0.050405
ENSG00000184205-TSPYL2	26.898	1.03488	0.377437	2.74185	0.00610942	0.050405
ENSG00000263606-AP000919.1	14.5897	-1.43832	0.524657	-2.74144	0.00611706	0.050405
ENSG00000163683-SMIM14	39.4022	0.906969	0.331094	2.73931	0.00615688	0.0506894
ENSG00000143815-LBR	197.436	-0.406702	0.1485	-2.73874	0.00616752	0.0507065
ENSG00000164663-USP49	72.4522	-0.631984	0.230766	-2.73863	0.0061696	0.0507065
ENSG00000244754-N4BP2L2	227.486	0.379464	0.138667	2.73652	0.00620936	0.0509894
ENSG00000174547-MRPL11	123.717	-0.497562	0.181878	-2.7357	0.00622482	0.0510724
ENSG00000134398-ERN2	21.0878	-1.20744	0.441416	-2.73539	0.00623068	0.0510766
ENSG00000233927-RPS28	2642.63	0.210873	0.0771199	2.73435	0.00625031	0.0511935
ENSG00000099783-HNRNPM	674.61	-0.260655	0.0953587	-2.73342	0.00626812	0.0512954
ENSG00000164683-HEY1	126.012	0.507449	0.185888	2.72987	0.00633587	0.0518053
ENSG00000177885-GRB2	112.358	-0.523539	0.191884	-2.72841	0.00636408	0.0519914
ENSG00000274049-INO80B-WBP1	50.1896	0.756482	0.27742	2.72685	0.0063943	0.0521937
ENSG00000204472-AIF1	155.333	-0.461194	0.169226	-2.72532	0.00642393	0.0523907
ENSG00000128228-SDF2L1	78.1552	-0.671211	0.246368	-2.72443	0.00644128	0.0524873
ENSG00000198937-CCDC167	56.0642	-0.70795	0.260063	-2.72223	0.00648435	0.0527933
ENSG00000089597-GANAB	167.205	-0.447299	0.164438	-2.72017	0.00652478	0.0530771
ENSG00000255245-FXYD6-FXYD2	21.5109	-1.17168	0.430882	-2.71926	0.0065428	0.0531783
ENSG00000234498-RPL13AP20	269.498	0.406714	0.149682	2.71719	0.00658389	0.0534668
ENSG00000258643-BCL2L2-PABPN1	703.528	-0.252879	0.0932208	-2.71269	0.0066739	0.0541517
ENSG00000264350-SNRPGP2	82.2628	-0.614345	0.226652	-2.71052	0.00671784	0.0544619
ENSG00000069493-CLEC2D	238.267	-0.380954	0.140581	-2.70985	0.0067313	0.0545246
ENSG00000188610-FAM72B	25.4492	-1.08626	0.401163	-2.70777	0.00677363	0.0547745
ENSG00000270181-BIVM-ERCC5	97.2906	0.61932	0.228698	2.70803	0.00676842	0.0547745
ENSG00000275066-SYNRG	127.341	0.485502	0.179583	2.70349	0.00686154	0.0554384
ENSG00000137731-FXYD2	22.8617	-1.12164	0.414954	-2.70304	0.00687076	0.0554659
ENSG00000099817-POLR2E	261.588	-0.392858	0.145405	-2.70182	0.0068961	0.0556235
ENSG00000171314-PGAM1	219.619	-0.380841	0.141029	-2.70045	0.0069246	0.0558062
ENSG00000136238-RAC1	606.552	-0.267486	0.099087	-2.6995	0.00694434	0.055918
ENSG00000135045-C9orf40	32.5698	-0.968688	0.358967	-2.69855	0.00696431	0.0560316
ENSG00000235175-RPL26P37	51.1032	0.789349	0.292572	2.69797	0.00697637	0.0560813
ENSG00000219747-AL133260.1	170.813	0.433616	0.160789	2.6968	0.00700088	0.0562309
ENSG00000100410-PHF5A	52.46	-0.722783	0.268091	-2.69603	0.00701708	0.0563137
ENSG00000184887-BTBD6	33.3905	-0.92845	0.344437	-2.69556	0.00702698	0.0563457
ENSG00000106052-TAX1BP1	216.229	0.382622	0.142014	2.69426	0.00705448	0.0565188
ENSG00000138623-SEMA7A	40.4914	0.840636	0.312063	2.69381	0.00706414	0.0565486
ENSG00000100281-HMGXB4	132.65	-0.467796	0.173983	-2.68874	0.00717217	0.0573037
ENSG00000230590-FTX	208.446	0.382437	0.142247	2.68854	0.00717647	0.0573037
ENSG00000259316-AC087632.1	28.7847	-1.11203	0.413558	-2.68894	0.00716786	0.0573037
ENSG00000229344-MTCO2P12	1792.32	0.283952	0.105642	2.68787	0.0071909	0.0573708
ENSG00000167720-SRR	82.279	-0.617437	0.229849	-2.68628	0.00722535	0.0575975
ENSG00000085231-AK6	83.2581	-0.594269	0.221285	-2.68554	0.00724126	0.0576762
ENSG00000145388-METTL14	68.4849	0.745111	0.277663	2.68351	0.00728542	0.057883
ENSG00000188042-ARL4C	323.984	-0.313693	0.116891	-2.68363	0.00728268	0.057883
ENSG00000270757-HSPE1-MOB4	241.998	-0.434852	0.162017	-2.68399	0.00727492	0.057883
ENSG00000174444-RPL4	1638.91	0.203336	0.0758061	2.68232	0.00731143	0.0580413
ENSG00000080815-PSEN1	33.0328	0.923187	0.344445	2.68022	0.00735747	0.0583582
ENSG00000077380-DYNC1I2	258.936	0.352148	0.131441	2.67914	0.00738115	0.0584703
ENSG00000235552-RPL6P27	930.804	0.220026	0.0821294	2.67902	0.00738385	0.0584703
ENSG00000254662-AP000781.1	44.5329	-0.823478	0.307557	-2.67748	0.00741778	0.0586902
ENSG00000234818-AC007314.1	14.9369	-1.40041	0.52318	-2.67672	0.00743457	0.0587744
ENSG00000198919-DZIP3	32.4804	1.0169	0.380184	2.67476	0.00747832	0.0590713
ENSG00000087502-ERGIC2	89.8365	-0.589784	0.220554	-2.6741	0.00749301	0.0591384
ENSG00000006025-OSBPL7	18.5945	1.22529	0.458446	2.67271	0.00752413	0.0593349
ENSG00000257621-PSMA3-AS1	117.536	0.505707	0.189265	2.67195	0.00754113	0.0594199
ENSG00000100836-PABPN1	817.138	-0.24216	0.0907586	-2.66818	0.00762634	0.0600417
ENSG00000187634-SAMD11	47.6241	-0.761507	0.285615	-2.6662	0.00767143	0.0603469
ENSG00000179456-ZBTB18	60.0675	0.683016	0.256286	2.66506	0.00769754	0.0605024
ENSG00000088832-FKBP1A	197.047	-0.414311	0.155572	-2.66315	0.00774135	0.0607617
ENSG00000143368-SF3B4	106.135	-0.507647	0.190625	-2.66306	0.00774326	0.0607617
ENSG00000143256-PFDN2	112.369	-0.523366	0.196601	-2.66207	0.00776618	0.0608914
ENSG00000096401-CDC5L	184.111	-0.395989	0.148917	-2.65912	0.0078344	0.0613759
ENSG00000124593-AL365205.1	376.052	-0.311053	0.117128	-2.65566	0.0079154	0.0619596
ENSG00000150593-PDCD4	25.3765	1.05913	0.398982	2.65459	0.00794044	0.0621047
ENSG00000152348-ATG10	3720.49	0.210802	0.0794591	2.65296	0.00797882	0.0623538
ENSG00000112655-PTK7	76.8183	0.60179	0.227134	2.64949	0.00806136	0.0629472
ENSG00000165733-BMS1	186.548	-0.421782	0.159355	-2.64682	0.00812534	0.0633431
ENSG00000224877-NDUFAF8	302.63	-0.370561	0.13999	-2.64706	0.0081195	0.0633431
ENSG00000260260-SNHG19	163.38	0.425974	0.160977	2.64618	0.00814062	0.0634105
ENSG00000254373-AC112191.2	31.7318	0.992613	0.375192	2.64562	0.00815424	0.0634647
ENSG00000152795-HNRNPDL	733.618	-0.247885	0.0937943	-2.64286	0.00822094	0.0638796
ENSG00000155561-NUP205	59.0706	-0.718596	0.27188	-2.64306	0.00821605	0.0638796
ENSG00000160124-CCDC58	85.5029	-0.612535	0.231825	-2.64223	0.00823619	0.0639461
ENSG00000107742-SPOCK2	25.288	1.03577	0.392094	2.64165	0.00825038	0.0640042
ENSG00000115850-LCT	27.2653	1.10538	0.418618	2.64054	0.00827737	0.0641614
ENSG00000115677-HDLBP	177.706	-0.431329	0.163408	-2.63958	0.00830077	0.0642906
ENSG00000141424-SLC39A6	75.9272	-0.607111	0.23006	-2.63893	0.00831693	0.0643634
ENSG00000099810-MTAP	34.2153	-0.883167	0.334708	-2.63862	0.00832447	0.0643696
ENSG00000125753-VASP	26.6444	1.03347	0.391772	2.63794	0.00834103	0.0644454
ENSG00000214425-LRRC37A4P	55.8297	-0.784543	0.297831	-2.63419	0.00843385	0.0651099
ENSG00000158545-ZC3H18	156.646	-0.434617	0.165053	-2.6332	0.00845844	0.0652469
ENSG00000160208-RRP1B	222.248	-0.381236	0.144865	-2.63166	0.00849699	0.0654913
ENSG00000168807-SNTB2	66.3979	0.680576	0.258721	2.63054	0.00852482	0.0656361
ENSG00000174177-CTU2	25.9306	-1.03858	0.394845	-2.63036	0.00852953	0.0656361
ENSG00000255112-CHMP1B	34.791	0.980632	0.373005	2.62901	0.00856345	0.065844
ENSG00000103495-MAZ	118.92	-0.508144	0.193377	-2.62774	0.00859545	0.0659837
ENSG00000237729-AC002075.2	119.38	0.494967	0.188349	2.62793	0.00859069	0.0659837
ENSG00000077514-POLD3	67.1513	-0.647505	0.246512	-2.62667	0.00862244	0.0660412
ENSG00000161533-ACOX1	37.6004	0.835575	0.318118	2.62662	0.00862369	0.0660412
ENSG00000228929-RPS13P2	109.071	0.577591	0.219893	2.6267	0.00862183	0.0660412
ENSG00000125266-EFNB2	52.9929	0.740007	0.281827	2.62575	0.00864581	0.0661044
ENSG00000185347-TEDC1	17.6381	-1.32679	0.505296	-2.62577	0.00864523	0.0661044
ENSG00000272760-AC093726.1	14.797	1.51918	0.578636	2.62545	0.00865336	0.0661092
ENSG00000134899-ERCC5	98.6181	0.595583	0.227054	2.62309	0.00871351	0.0665154
ENSG00000228300-C19orf24	67.2671	-0.633954	0.241852	-2.62125	0.0087608	0.066823
ENSG00000070950-RAD18	33.359	-0.884123	0.337427	-2.62019	0.00878799	0.06687
ENSG00000109084-TMEM97	106.61	-0.532747	0.203291	-2.62062	0.00877704	0.06687
ENSG00000260007-AC107871.1	39.303	-0.815833	0.311358	-2.62024	0.00878678	0.06687
ENSG00000146109-ABT1	132.141	-0.543824	0.207599	-2.61959	0.00880352	0.0669348
ENSG00000134480-CCNH	114.214	0.511233	0.195279	2.61796	0.00884561	0.0672013
ENSG00000131351-HAUS8	29.8738	-0.938702	0.358723	-2.61679	0.00887609	0.0673792
ENSG00000064490-RFXANK	55.2579	0.705859	0.269961	2.61467	0.00893134	0.0677447
ENSG00000060971-ACAA1	34.8963	0.885715	0.338791	2.61434	0.00893989	0.0677557
ENSG00000003756-RBM5	112.933	0.501075	0.191757	2.61307	0.00897322	0.0679543
ENSG00000164587-RPS14	3332.23	0.170743	0.0653644	2.61217	0.00899686	0.0680794
ENSG00000181722-ZBTB20	24.6032	1.09877	0.420822	2.61101	0.00902755	0.0682574
ENSG00000215790-SLC35E2A	29.4535	1.02153	0.3914	2.60994	0.00905574	0.0684163
ENSG00000166340-TPP1	40.8261	0.795782	0.305099	2.60827	0.00910004	0.0686966
ENSG00000148303-RPL7A	1380.69	0.207776	0.0796752	2.60779	0.00911295	0.0687397
ENSG00000111364-DDX55	108.481	-0.49836	0.191145	-2.60724	0.0091275	0.0687951
ENSG00000008226-DLEC1	33.7247	0.901901	0.345987	2.60675	0.00914059	0.0688394
ENSG00000238045-AC009133.1	119.045	-0.503644	0.193243	-2.60628	0.00915314	0.0688796
ENSG00000084463-WBP11	127.022	-0.512332	0.196644	-2.60537	0.00917743	0.0689536
ENSG00000197324-LRP10	27.2465	1.05511	0.404955	2.60551	0.00917378	0.0689536
ENSG00000205100-HSP90AA4P	17.7885	-1.23958	0.475876	-2.60484	0.00919178	0.0690071
ENSG00000169627-BOLA2B	142.318	-0.45034	0.172997	-2.60317	0.00923671	0.0692899
ENSG00000183763-TRAIP	15.8649	-1.32181	0.508086	-2.60155	0.00928022	0.0695616
ENSG00000113263-ITK	61.5142	0.664464	0.255444	2.60121	0.00928967	0.0695778
ENSG00000162944-RFTN2	69.9301	0.654505	0.251681	2.60053	0.00930789	0.0696595
ENSG00000137310-TCF19	34.084	-0.887168	0.341283	-2.59951	0.00933576	0.0697822
ENSG00000182923-CEP63	59.733	-0.694669	0.267245	-2.59938	0.00933935	0.0697822
ENSG00000183134-PTGDR2	67.1542	-0.659164	0.25361	-2.59912	0.00934623	0.0697822
ENSG00000106266-SNX8	27.6289	-1.00889	0.388239	-2.59864	0.00935937	0.0698257
ENSG00000163535-SGO2	77.8677	-0.589997	0.227186	-2.59698	0.00940477	0.0701096
ENSG00000009790-TRAF3IP3	40.2256	0.81807	0.315651	2.59169	0.00955047	0.0710847
ENSG00000166037-CEP57	128.835	-0.485505	0.187314	-2.59193	0.00954382	0.0710847
ENSG00000070759-TESK2	18.4125	-1.27491	0.492155	-2.59046	0.00958482	0.0712848
ENSG00000105063-PPP6R1	174.881	-0.425071	0.164238	-2.58814	0.00964953	0.0717091
ENSG00000225855-RUSC1-AS1	162.662	-0.409952	0.158412	-2.58788	0.00965691	0.0717091
ENSG00000134684-YARS	120.906	-0.470969	0.18204	-2.58718	0.00967663	0.0717679
ENSG00000196550-FAM72A	22.0842	-1.08852	0.420756	-2.58706	0.00967986	0.0717679
ENSG00000181544-FANCB	16.0306	-1.37813	0.533024	-2.5855	0.00972386	0.0720381
ENSG00000099622-CIRBP	261.393	0.358642	0.138741	2.58498	0.00973838	0.0720897
ENSG00000132963-POMP	533.486	-0.2665	0.103136	-2.58398	0.00976668	0.0722432
ENSG00000143033-MTF2	436.997	0.273569	0.105894	2.58341	0.0097829	0.0723071
ENSG00000060558-GNA15	77.5748	-0.581489	0.225257	-2.58144	0.00983885	0.0726643
ENSG00000254870-ATP6V1G2-DDX39B	199.182	-0.432816	0.167772	-2.57978	0.00988619	0.0729575
ENSG00000139496-NUP58	63.7042	-0.661854	0.256653	-2.57879	0.00991467	0.0731111
ENSG00000058804-NDC1	46.408	-0.78524	0.304642	-2.57759	0.00994933	0.0732145
ENSG00000164855-TMEM184A	61.7942	-0.638564	0.247741	-2.57754	0.00995057	0.0732145
ENSG00000231414-AC016700.2	85.0835	0.575985	0.223466	2.5775	0.00995171	0.0732145
ENSG00000134697-GNL2	255.057	-0.375855	0.145861	-2.57679	0.00997213	0.0732518
ENSG00000158710-TAGLN2	128.389	-0.463599	0.179911	-2.57682	0.0099715	0.0732518
ENSG00000166946-CCNDBP1	54.9771	0.674668	0.261862	2.57643	0.00998278	0.0732736
ENSG00000005059-MCUB	17.5386	-1.21818	0.473047	-2.57517	0.0100191	0.0734839
ENSG00000230734-RPL10P3	307.777	0.37223	0.144724	2.57199	0.0101115	0.0741042
ENSG00000279423-AL445363.3	18.7618	1.33238	0.518507	2.56964	0.0101804	0.0745521
ENSG00000234851-RPL23AP42	436.622	-0.387552	0.15087	-2.56877	0.010206	0.074682
ENSG00000049541-RFC2	15.631	-1.31512	0.51205	-2.56835	0.0102184	0.074716
ENSG00000177600-RPLP2	1748.47	0.226788	0.0883276	2.56757	0.0102413	0.0748258
ENSG00000148459-PDSS1	33.6394	-0.908708	0.354031	-2.56675	0.0102658	0.0748994
ENSG00000162521-RBBP4	265.009	-0.345849	0.134752	-2.56657	0.0102711	0.0748994
ENSG00000169689-CENPX	78.917	-0.62407	0.243191	-2.56617	0.0102828	0.0748994
ENSG00000182473-EXOC7	78.1627	0.597126	0.232688	2.56621	0.0102815	0.0748994
ENSG00000198965-OR10R2	19.2774	1.24073	0.483757	2.56478	0.0103243	0.0751442
ENSG00000111667-USP5	45.4295	-0.743917	0.290183	-2.56361	0.010359	0.075282
ENSG00000166451-CENPN	67.5701	-0.614778	0.239793	-2.56378	0.0103538	0.075282
ENSG00000245910-SNHG6	307.017	0.365398	0.142592	2.56254	0.0103911	0.075458
ENSG00000118402-ELOVL4	178.375	-0.389015	0.151947	-2.5602	0.0104611	0.0758521
ENSG00000217930-PAM16	35.8235	-0.850015	0.332012	-2.5602	0.0104613	0.0758521
ENSG00000086712-TXLNG	83.2112	-0.577954	0.225929	-2.55812	0.010524	0.076191
ENSG00000173812-EIF1	953.095	0.204607	0.0799794	2.55825	0.01052	0.076191
ENSG00000092199-HNRNPC	846.825	-0.237517	0.0928608	-2.55777	0.0105345	0.0762096
ENSG00000089195-TRMT6	104.916	-0.526274	0.205824	-2.55691	0.0105607	0.0763412
ENSG00000224864-AC011447.1	141.865	0.43993	0.172342	2.55266	0.0106905	0.0772209
ENSG00000127084-FGD3	41.0158	0.775775	0.304	2.55189	0.010714	0.0772804
ENSG00000152234-ATP5F1A	443.95	0.29547	0.115786	2.55186	0.0107149	0.0772804
ENSG00000165959-CLMN	56.7519	0.668642	0.262063	2.55146	0.0107274	0.0773116
ENSG00000038219-BOD1L1	447.316	0.293575	0.115148	2.54954	0.0107865	0.077655
ENSG00000155438-NIFK	169.38	-0.433124	0.169893	-2.54939	0.0107913	0.077655
ENSG00000108561-C1QBP	219.547	-0.374583	0.14698	-2.54853	0.0108178	0.0777868
ENSG00000162783-IER5	26.1183	-0.980194	0.38473	-2.54775	0.0108422	0.0779035
ENSG00000172661-WASHC2C	39.9026	0.784783	0.308117	2.54703	0.0108643	0.0779508
ENSG00000260266-PPIAP46	297.515	-0.345502	0.13565	-2.54701	0.0108651	0.0779508
ENSG00000270800-RPS10-NUDT3	1017.47	0.229084	0.0899686	2.54626	0.0108883	0.0780586
ENSG00000156471-PTDSS1	126.483	0.457991	0.179919	2.54554	0.0109109	0.0781621
ENSG00000198380-GFPT1	40.7503	-0.805957	0.316697	-2.54489	0.0109314	0.0782498
ENSG00000001626-CFTR	153.427	0.469155	0.184374	2.54458	0.010941	0.0782604
ENSG00000184481-FOXO4	17.6896	1.21422	0.477423	2.54327	0.0109821	0.0784365
ENSG00000198517-MAFK	61.9296	-0.629686	0.247568	-2.54349	0.0109751	0.0784365
ENSG00000071794-HLTF	94.6765	-0.525768	0.206787	-2.54255	0.0110046	0.0785383
ENSG00000258644-SYNJ2BP-COX16	85.5025	-0.55138	0.216928	-2.54177	0.0110293	0.078656
ENSG00000151240-DIP2C	15.5616	1.32508	0.521392	2.54143	0.01104	0.0786738
ENSG00000100897-DCAF11	169.51	0.39745	0.156579	2.53834	0.0111379	0.0792528
ENSG00000136950-ARPC5L	64.6133	-0.626413	0.246759	-2.53856	0.0111308	0.0792528
ENSG00000146950-SHROOM2	27.3287	0.97166	0.38302	2.53684	0.0111859	0.0795347
ENSG00000154380-ENAH	63.7193	-0.624888	0.246422	-2.53584	0.0112176	0.0797013
ENSG00000103335-PIEZO1	28.9149	-0.931783	0.367608	-2.53472	0.0112536	0.0798975
ENSG00000128059-PPAT	45.5078	-0.749426	0.295743	-2.53404	0.0112755	0.0799932
ENSG00000130305-NSUN5	118.026	-0.510429	0.201548	-2.53255	0.0113236	0.0802154
ENSG00000133943-DGLUCY	44.7073	0.742082	0.293007	2.53264	0.0113207	0.0802154
ENSG00000137807-KIF23	39.5788	-0.786685	0.310781	-2.53132	0.0113635	0.0804382
ENSG00000106615-RHEB	85.3114	-0.638269	0.2522	-2.53081	0.01138	0.0804953
ENSG00000110031-LPXN	27.4262	0.947822	0.374644	2.52993	0.0114085	0.0806372
ENSG00000127837-AAMP	150.957	-0.428416	0.169616	-2.5258	0.0115434	0.0814695
ENSG00000163939-PBRM1	183.463	-0.414906	0.164255	-2.526	0.0115371	0.0814695
ENSG00000143797-MBOAT2	19.5427	-1.14254	0.452616	-2.5243	0.0115928	0.0817577
ENSG00000203930-LINC00632	329.054	0.35007	0.138755	2.52294	0.011638	0.0820158
ENSG00000088833-NSFL1C	96.3011	-0.516053	0.204614	-2.52208	0.0116663	0.082068
ENSG00000188243-COMMD6	141.955	0.446996	0.177243	2.52193	0.0116712	0.082068
ENSG00000277734-TRAC	80.2717	0.576763	0.228676	2.52218	0.0116629	0.082068
ENSG00000223551-TMSB4XP4	302.848	-0.30354	0.120393	-2.52124	0.0116942	0.0821692
ENSG00000133316-WDR74	37.0206	-0.838804	0.332862	-2.51997	0.0117363	0.0824048
ENSG00000132824-SERINC3	99.382	0.501738	0.199357	2.51678	0.0118433	0.0830948
ENSG00000244560-AC004890.2	33.1761	0.856733	0.340479	2.51626	0.0118607	0.0831555
ENSG00000189308-LIN54	20.0422	-1.1949	0.47501	-2.51553	0.0118854	0.0832674
ENSG00000170160-CCDC144A	92.095	0.516086	0.205226	2.51472	0.0119125	0.0833965
ENSG00000204406-MBD5	58.7008	0.664725	0.264392	2.51416	0.0119315	0.0834682
ENSG00000115875-SRSF7	334.563	-0.317436	0.126316	-2.51303	0.01197	0.0836172
ENSG00000133983-COX16	87.1169	-0.542273	0.215786	-2.51302	0.0119704	0.0836172
ENSG00000246223-LINC01550	84.0119	0.573542	0.228285	2.51239	0.0119916	0.0837041
ENSG00000084072-PPIE	48.7581	-0.708048	0.281901	-2.51169	0.0120155	0.08381
ENSG00000068745-IP6K2	81.8787	0.554675	0.221092	2.5088	0.0121144	0.0843858
ENSG00000213757-AC020898.1	79.5229	0.56269	0.224291	2.50875	0.0121158	0.0843858
ENSG00000134285-FKBP11	17.9636	-1.16764	0.465497	-2.50838	0.0121286	0.0844136
ENSG00000119688-ABCD4	41.5807	0.81807	0.326224	2.50769	0.0121522	0.0845163
ENSG00000100426-ZBED4	79.6911	0.562886	0.224502	2.50726	0.012167	0.0845576
ENSG00000165512-ZNF22	161.522	-0.401882	0.160306	-2.50698	0.0121769	0.0845649
ENSG00000119655-NPC2	43.284	0.778192	0.310448	2.50667	0.0121873	0.0845758
ENSG00000126602-TRAP1	152.329	-0.432106	0.172428	-2.50601	0.0122103	0.0846732
ENSG00000133026-MYH10	192.256	-0.374334	0.149407	-2.50546	0.0122293	0.0847438
ENSG00000214736-TOMM6	360.015	-0.301476	0.120393	-2.50409	0.0122767	0.0850106
ENSG00000204946-ZNF783	45.4199	0.723064	0.288801	2.50367	0.0122912	0.0850488
ENSG00000231409-AC018868.1	142.799	0.457146	0.182686	2.50236	0.012337	0.085304
ENSG00000080839-RBL1	31.9189	-0.909934	0.363721	-2.50173	0.0123587	0.0853644
ENSG00000260874-AC106820.5	16.5601	-1.21621	0.486176	-2.50159	0.0123636	0.0853644
ENSG00000159335-PTMS	29.5998	-0.899304	0.359641	-2.50056	0.0123997	0.0855519
ENSG00000116750-UCHL5	107.622	-0.494252	0.197706	-2.49994	0.0124216	0.0856407
ENSG00000156136-DCK	27.722	-0.999516	0.400153	-2.49784	0.0124954	0.0860876
ENSG00000154144-TBRG1	72.3415	0.604088	0.241947	2.49677	0.0125329	0.0862374
ENSG00000171084-FAM86JP	16.5561	1.25173	0.501353	2.49671	0.0125352	0.0862374
ENSG00000095380-NANS	35.1601	-0.868883	0.348289	-2.49472	0.0126058	0.0865979
ENSG00000124767-GLO1	108.999	-0.511436	0.204987	-2.49496	0.0125971	0.0865979
ENSG00000236735-RPL31P63	62.2182	0.694281	0.278404	2.49379	0.0126388	0.0867619
ENSG00000105379-ETFB	138.728	0.428468	0.171966	2.49159	0.0127171	0.0871558
ENSG00000175322-ZNF519	30.1795	-0.900448	0.361457	-2.49116	0.0127327	0.0871558
ENSG00000180353-HCLS1	96.3984	0.50771	0.203787	2.49138	0.0127247	0.0871558
ENSG00000225489-AL354707.1	47.8906	0.744103	0.298682	2.49129	0.012728	0.0871558
ENSG00000146247-PHIP	303.189	-0.300132	0.12051	-2.49051	0.012756	0.0872532
ENSG00000018699-TTC27	19.0343	-1.1548	0.463759	-2.49009	0.0127711	0.0872934
ENSG00000069424-KCNAB2	51.1038	0.708336	0.284511	2.48966	0.0127866	0.0873367
ENSG00000100350-FOXRED2	74.5578	-0.596331	0.239815	-2.48662	0.0128962	0.0880223
ENSG00000143799-PARP1	322.514	-0.321141	0.129206	-2.4855	0.0129368	0.0882366
ENSG00000147155-EBP	63.0304	-0.631279	0.25406	-2.48477	0.0129637	0.0883568
ENSG00000232713-AC010733.1	29.2836	0.971201	0.391167	2.48283	0.0130343	0.0887744
ENSG00000037474-NSUN2	108.327	-0.47608	0.191838	-2.48168	0.0130763	0.0889972
ENSG00000164332-UBLCP1	67.6601	0.624298	0.251711	2.48021	0.0131304	0.0891743
ENSG00000165704-HPRT1	52.8458	-0.704314	0.283966	-2.48028	0.013128	0.0891743
ENSG00000168538-TRAPPC11	20.4589	1.06534	0.429481	2.48052	0.0131192	0.0891743
ENSG00000226806-AC011893.1	153.701	0.407596	0.164384	2.47954	0.0131553	0.0892798
ENSG00000196642-RABL6	102.379	-0.48909	0.197299	-2.47892	0.0131779	0.08937
ENSG00000137100-DCTN3	59.8824	0.639144	0.257873	2.47852	0.0131929	0.0894078
__no_feature-	486643	0.178154	0.0719073	2.47755	0.0132286	0.0895866
ENSG00000102144-PGK1	282.787	-0.32459	0.131038	-2.47707	0.0132464	0.0896436
ENSG00000278540-ACACA	37.8021	-0.804262	0.324732	-2.47669	0.0132606	0.0896755
ENSG00000176715-ACSF3	51.777	0.695775	0.280974	2.4763	0.0132753	0.0897115
ENSG00000157778-PSMG3	229.411	-0.368974	0.149057	-2.47538	0.0133093	0.0898142
ENSG00000204822-MRPL53	87.2844	0.528848	0.21364	2.47542	0.013308	0.0898142
ENSG00000104549-SQLE	63.1766	-0.648252	0.262159	-2.47275	0.0134079	0.0903852
ENSG00000197771-MCMBP	31.1921	-0.874966	0.353863	-2.47262	0.0134128	0.0903852
ENSG00000184445-KNTC1	36.8621	-0.865568	0.350338	-2.47067	0.013486	0.0908142
ENSG00000013573-DDX11	29.6139	-0.933125	0.377726	-2.47037	0.0134972	0.0908256
ENSG00000128159-TUBGCP6	56.7174	0.6618	0.267924	2.4701	0.0135075	0.0908304
ENSG00000143862-ARL8A	40.4786	0.761741	0.308874	2.46618	0.0136561	0.0917651
ENSG00000168772-CXXC4	31.9758	0.870203	0.353071	2.46467	0.013714	0.0920891
ENSG00000173692-PSMD1	394.975	-0.279374	0.113408	-2.46345	0.0137606	0.092288
ENSG00000205502-C2CD4B	13.3846	-1.3432	0.545263	-2.46339	0.0137629	0.092288
ENSG00000154978-VOPP1	223.313	0.341254	0.138549	2.46306	0.0137758	0.0923095
ENSG00000119333-WDR34	48.8815	-0.741625	0.301263	-2.46172	0.0138274	0.0925901
ENSG00000112144-ICK	15.0281	1.41145	0.57346	2.46129	0.0138437	0.0926344
ENSG00000118855-MFSD1	21.3078	1.0878	0.442116	2.46045	0.0138763	0.0927222
ENSG00000269570-AP001350.1	25.2353	-0.980274	0.398394	-2.46056	0.0138719	0.0927222
ENSG00000151414-NEK7	32.7235	-0.856559	0.348402	-2.45854	0.0139504	0.0931527
ENSG00000196305-IARS	72.1006	-0.639076	0.260166	-2.45642	0.0140329	0.0935834
ENSG00000239559-RPL37P2	56.8816	0.640051	0.260567	2.45638	0.0140346	0.0935834
ENSG00000151353-TMEM18	74.1144	-0.622748	0.253651	-2.45514	0.0140831	0.093832
ENSG00000165916-PSMC3	135.223	-0.440105	0.179275	-2.45492	0.0140915	0.093832
ENSG00000128973-CLN6	25.5095	-0.976508	0.398039	-2.4533	0.0141554	0.0941261
ENSG00000171105-INSR	46.0049	0.7343	0.29931	2.45331	0.0141548	0.0941261
ENSG00000105053-VRK3	47.1128	0.71337	0.29081	2.45304	0.0141653	0.0941266
ENSG00000113742-CPEB4	16.0944	1.20025	0.48946	2.4522	0.0141986	0.094282
ENSG00000158092-NCK1	25.4101	1.00689	0.410967	2.45005	0.0142838	0.0947159
ENSG00000213988-ZNF90	143.351	0.421858	0.172177	2.45015	0.0142798	0.0947159
ENSG00000105404-RABAC1	55.929	0.638979	0.261062	2.44761	0.0143808	0.0951693
ENSG00000149809-TM7SF2	22.2731	1.03747	0.423863	2.44766	0.0143789	0.0951693
ENSG00000168397-ATG4B	117.975	0.446929	0.182601	2.44758	0.0143821	0.0951693
ENSG00000164039-BDH2	38.0845	0.776914	0.317643	2.44587	0.0144502	0.0955533
ENSG00000129515-SNX6	80.9273	0.54321	0.222118	2.44559	0.0144616	0.0955626
ENSG00000103426-CORO7-PAM16	35.9361	-0.806476	0.329834	-2.4451	0.0144812	0.0956259
ENSG00000105364-MRPL4	80.9666	-0.550478	0.225226	-2.44411	0.014521	0.0958226
ENSG00000074706-IPCEF1	17.0324	1.16562	0.477214	2.44256	0.0145836	0.096169
ENSG00000230155-FO393401.1	17.0297	1.21277	0.496915	2.4406	0.0146629	0.0966048
ENSG00000284922-AP000812.5	77.3916	-0.559381	0.229214	-2.44043	0.0146699	0.0966048
ENSG00000136522-MRPL47	87.2887	-0.530607	0.217638	-2.43803	0.0147676	0.0971811
ENSG00000166986-MARS	127.077	-0.450796	0.184968	-2.43715	0.0148033	0.0973491
ENSG00000179454-KLHL28	34.4302	0.8297	0.340511	2.43663	0.0148248	0.0974234
ENSG00000214753-HNRNPUL2	165.846	-0.427985	0.175665	-2.43636	0.0148358	0.0974284
ENSG00000084093-REST	180.513	0.384611	0.157956	2.43493	0.0148948	0.0977487
ENSG00000055070-SZRD1	97.3757	-0.493464	0.202694	-2.43453	0.0149111	0.0977884
ENSG00000099194-SCD	35.1777	-0.817457	0.335919	-2.4335	0.0149538	0.0978276
ENSG00000123609-NMI	83.9657	-0.578774	0.237871	-2.43314	0.0149684	0.0978276
ENSG00000136527-TRA2B	378.168	-0.284763	0.117034	-2.43317	0.0149673	0.0978276
ENSG00000230076-RPL10P6	45.4473	0.758738	0.311765	2.43368	0.014946	0.0978276
ENSG00000285338-AC091564.7	88.5078	0.518755	0.213145	2.43381	0.0149409	0.0978276
ENSG00000130755-GMFG	175.411	0.383704	0.157804	2.43152	0.0150357	0.0982003
ENSG00000111845-PAK1IP1	41.4626	-0.744142	0.306159	-2.43058	0.0150749	0.0983684
ENSG00000149480-MTA2	141.493	-0.419612	0.172651	-2.4304	0.015082	0.0983684
ENSG00000182459-TEX19	28.5813	-0.920413	0.378956	-2.42881	0.0151485	0.098734
ENSG00000182796-TMEM198B	15.4218	1.30944	0.539336	2.42788	0.0151874	0.0989205
ENSG00000204410-MSH5	27.8187	-0.95848	0.394968	-2.42673	0.0152357	0.0991675
ENSG00000198624-CCDC69	81.5723	0.538911	0.222221	2.42511	0.0153039	0.0994753
ENSG00000236565-HNRNPA3P5	15.5097	-1.26975	0.523576	-2.42515	0.015302	0.0994753
ENSG00000067208-EVI5	62.5169	0.608742	0.251298	2.42239	0.0154189	0.100051
ENSG00000080823-MOK	21.1522	1.09691	0.452935	2.42178	0.0154448	0.100051
ENSG00000135250-SRPK2	545.737	0.256715	0.105985	2.42218	0.0154276	0.100051
ENSG00000170315-UBB	521.034	-0.25326	0.10457	-2.42192	0.0154389	0.100051
ENSG00000188921-HACD4	39.1499	0.782875	0.323254	2.42186	0.0154413	0.100051
ENSG00000172667-ZMAT3	38.399	0.83779	0.346025	2.42118	0.0154701	0.100146
ENSG00000115239-ASB3	91.0344	0.524084	0.216491	2.42081	0.0154858	0.10018
ENSG00000225648-SBDSP1	23.1788	-0.987306	0.407901	-2.42045	0.0155013	0.100212
ENSG00000084453-SLCO1A2	49.5776	0.695869	0.287617	2.41943	0.0155451	0.100427
ENSG00000075303-SLC25A40	17.3897	-1.15501	0.477698	-2.41786	0.015612	0.100723
ENSG00000284135-MIR3654	34.8744	0.872773	0.360937	2.41807	0.0156029	0.100723
ENSG00000221983-UBA52	1780.87	0.19829	0.0820216	2.41753	0.015626	0.100746
ENSG00000020426-MNAT1	55.4469	-0.66189	0.273869	-2.41681	0.0156572	0.10076
ENSG00000164631-ZNF12	28.1228	0.881305	0.364621	2.41705	0.0156471	0.10076
ENSG00000249590-AC004832.3	65.358	-0.595967	0.246599	-2.41675	0.01566	0.10076
ENSG00000105193-RPS16	3729.72	0.143979	0.0596148	2.41515	0.0157286	0.101065
ENSG00000266049-AP001011.1	28.9412	-0.91466	0.378713	-2.41518	0.0157276	0.101065
ENSG00000030582-GRN	38.7593	0.774018	0.320734	2.41327	0.01581	0.10152
ENSG00000119720-NRDE2	251.442	-0.336966	0.139666	-2.41265	0.0158372	0.101626
ENSG00000164306-PRIMPOL	22.8172	-1.00822	0.417988	-2.41208	0.0158618	0.101716
ENSG00000127445-PIN1	101.623	-0.47994	0.199003	-2.41173	0.0158771	0.101745
ENSG00000077721-UBE2A	169.237	-0.377237	0.15647	-2.41093	0.015912	0.101901
ENSG00000135829-DHX9	214.319	-0.404491	0.167864	-2.40963	0.0159687	0.102195
ENSG00000204592-HLA-E	22.2876	0.986206	0.409635	2.40753	0.016061	0.102717
ENSG00000161381-PLXDC1	17.0575	1.26523	0.52561	2.40716	0.0160773	0.102752
ENSG00000065970-FOXJ2	25.5528	-0.932491	0.387679	-2.40532	0.0161584	0.103202
ENSG00000188878-FBF1	13.6348	1.3065	0.543589	2.40347	0.0162401	0.103585
ENSG00000276570-AC010327.5	164.68	-0.404436	0.168254	-2.40372	0.0162293	0.103585
ENSG00000213390-ARHGAP19	41.721	-0.725036	0.302043	-2.40044	0.0163756	0.104379
ENSG00000170075-GPR37L1	38.3197	0.760622	0.317055	2.39902	0.0164389	0.104713
ENSG00000215319-EIF5P1	38.025	-0.803665	0.335316	-2.39674	0.0165418	0.105298
ENSG00000151466-SCLT1	125.547	-0.426502	0.178044	-2.39549	0.0165983	0.105587
ENSG00000074842-MYDGF	66.3073	-0.607	0.253473	-2.39473	0.0166327	0.105649
ENSG00000146083-RNF44	104.662	0.466924	0.194995	2.39454	0.0166412	0.105649
ENSG00000165525-NEMF	261.049	0.311148	0.129925	2.39483	0.016628	0.105649
ENSG00000160131-VMA21	104.924	-0.464819	0.194281	-2.39251	0.0167337	0.106165
ENSG00000163389-POGLUT1	38.633	0.764547	0.319659	2.39175	0.0167681	0.106313
ENSG00000205937-RNPS1	247.262	-0.326512	0.136596	-2.39035	0.0168322	0.106649
ENSG00000218283-MORF4L1P1	56.0673	-0.689124	0.288555	-2.38819	0.0169315	0.107207
ENSG00000242114-MTFP1	65.0634	-0.594848	0.249266	-2.3864	0.0170143	0.10766
ENSG00000213432-RPL17P34	158.508	0.381635	0.160076	2.38408	0.0171217	0.108267
ENSG00000158828-PINK1	26.6288	0.906558	0.380346	2.38351	0.0171484	0.108364
ENSG00000163468-CCT3	377.188	-0.270995	0.113712	-2.38317	0.017164	0.108391
ENSG00000086015-MAST2	17.9651	-1.1033	0.463094	-2.38245	0.0171976	0.10846
ENSG00000166170-BAG5	73.7417	-0.548978	0.230407	-2.38265	0.0171886	0.10846
ENSG00000162062-TEDC2	21.4282	-1.10139	0.462451	-2.38164	0.0172357	0.108628
ENSG00000120948-TARDBP	216.974	-0.370283	0.15549	-2.38139	0.0172472	0.108629
ENSG00000186919-ZACN	68.006	0.60531	0.254223	2.38102	0.0172648	0.108668
ENSG00000146263-MMS22L	28.4834	-0.877063	0.368458	-2.38036	0.0172958	0.108791
ENSG00000092964-DPYSL2	33.0737	-0.821861	0.34537	-2.37965	0.0173289	0.108928
ENSG00000256690-AP001160.1	34.4602	-0.821359	0.345212	-2.37929	0.0173461	0.108964
ENSG00000120254-MTHFD1L	24.0255	-0.971639	0.408476	-2.37869	0.0173742	0.109069
ENSG00000048828-FAM120A	541.87	-0.238996	0.100493	-2.37823	0.017396	0.109134
ENSG00000073536-NLE1	22.6955	-0.984639	0.414064	-2.37798	0.0174076	0.109135
ENSG00000157216-SSBP3	375.544	-0.284281	0.119684	-2.37527	0.0175363	0.109799
ENSG00000184154-LRTOMT	83.6521	-0.529643	0.222983	-2.37526	0.0175365	0.109799
ENSG00000107077-KDM4C	24.8318	0.940186	0.396125	2.37346	0.0176223	0.110191
ENSG00000183513-COA5	50.2052	0.65042	0.274033	2.37351	0.01762	0.110191
ENSG00000106624-AEBP1	111.153	0.49015	0.20659	2.37258	0.0176643	0.110358
ENSG00000157306-ZFHX2-AS1	51.5226	0.648248	0.273271	2.37218	0.0176836	0.110358
ENSG00000214485-RPL7P1	182.972	0.36009	0.151783	2.3724	0.0176729	0.110358
ENSG00000163781-TOPBP1	123.531	-0.42526	0.179357	-2.37102	0.0177392	0.11056
ENSG00000218208-RPS27AP11	252.932	0.332422	0.140188	2.37125	0.0177281	0.11056
ENSG00000247556-OIP5-AS1	190.98	-0.355118	0.149866	-2.36957	0.0178089	0.110922
ENSG00000162341-TPCN2	37.008	0.763251	0.32228	2.36828	0.017871	0.111236
ENSG00000136878-USP20	15.0632	1.22739	0.518417	2.36757	0.0179054	0.111378
ENSG00000099797-TECR	37.4985	-0.768336	0.324707	-2.36625	0.0179694	0.111703
ENSG00000233406-AL162430.1	102.91	0.476456	0.201495	2.3646	0.0180494	0.112092
ENSG00000253719-ATXN7L3B	83.9533	0.518389	0.21924	2.36448	0.0180555	0.112092
ENSG00000128654-MTX2	28.2085	-0.994973	0.421184	-2.36233	0.0181607	0.112672
ENSG00000210196-MT-TP	83.64	-0.527651	0.223525	-2.36059	0.0182459	0.113127
ENSG00000066379-ZNRD1	59.9326	0.647337	0.274397	2.35912	0.0183182	0.113428
ENSG00000161981-SNRNP25	94.7311	-0.487637	0.206695	-2.35921	0.0183139	0.113428
ENSG00000101557-USP14	140.839	-0.401349	0.170214	-2.35791	0.0183781	0.113725
ENSG00000123415-SMUG1	14.8673	1.22776	0.521039	2.35636	0.0184551	0.114127
ENSG00000123983-ACSL3	63.2328	-0.596457	0.253227	-2.35543	0.0185014	0.114288
ENSG00000279078-SND1-IT1	30.5805	0.837547	0.355592	2.35536	0.0185049	0.114288
ENSG00000090971-NAT14	69.1739	0.584048	0.24816	2.35352	0.0185968	0.114781
ENSG00000125691-RPL23	3136.31	0.150664	0.0640429	2.35254	0.0186455	0.115006
ENSG00000151746-BICD1	57.3986	0.609079	0.259062	2.35109	0.0187183	0.115307
ENSG00000164611-PTTG1	65.2955	-0.604284	0.257018	-2.35113	0.0187164	0.115307
ENSG00000144034-TPRKB	102.29	-0.4773	0.203198	-2.34894	0.018827	0.115826
ENSG00000253954-HMGN1P38	24.4285	-0.946985	0.403115	-2.34917	0.0188153	0.115826
ENSG00000091483-FH	88.5759	-0.510369	0.21756	-2.34588	0.0189825	0.116674
ENSG00000185480-PARPBP	32.679	-0.801044	0.341493	-2.34571	0.0189908	0.116674
ENSG00000275964-AL355001.2	13.804	1.24735	0.531806	2.3455	0.0190014	0.116674
ENSG00000138821-SLC39A8	46.2063	-0.679933	0.289935	-2.34512	0.0190209	0.116715
ENSG00000145982-FARS2	55.8276	0.609577	0.259959	2.34489	0.0190325	0.116715
ENSG00000137337-MDC1	61.2916	-0.613228	0.261584	-2.34428	0.0190637	0.116756
ENSG00000160214-RRP1	41.7198	-0.742506	0.316723	-2.34434	0.0190607	0.116756
ENSG00000100938-GMPR2	57.0246	0.621838	0.265423	2.34282	0.0191386	0.117065
ENSG00000119820-YIPF4	71.5498	0.612214	0.261304	2.34292	0.0191335	0.117065
ENSG00000146677-AC004453.1	225.082	0.327387	0.139757	2.34254	0.0191529	0.117077
ENSG00000105447-GRWD1	68.5668	-0.559554	0.23891	-2.34212	0.0191747	0.117135
ENSG00000172301-COPRS	67.2378	-0.620888	0.265293	-2.34038	0.019264	0.117605
ENSG00000179833-SERTAD2	77.2234	0.519727	0.222096	2.3401	0.0192784	0.117618
ENSG00000198563-DDX39B	208.65	-0.387301	0.165589	-2.33894	0.0193387	0.11791
ENSG00000143390-RFX5	32.461	0.856831	0.366471	2.33806	0.0193841	0.117935
ENSG00000160299-PCNT	151.547	-0.41273	0.176539	-2.3379	0.0193922	0.117935
ENSG00000163428-LRRC58	134.456	-0.398865	0.170571	-2.33841	0.019366	0.117935
ENSG00000170919-TPT1-AS1	29.2361	0.852166	0.36445	2.33822	0.0193757	0.117935
ENSG00000169714-CNBP	104.953	-0.45315	0.193895	-2.33709	0.0194347	0.118119
ENSG00000062822-POLD1	33.285	-0.830672	0.355582	-2.33609	0.0194863	0.118313
ENSG00000110046-ATG2A	32.302	0.845729	0.362042	2.336	0.0194915	0.118313
ENSG00000178971-CTC1	26.1692	0.888399	0.38044	2.33519	0.0195335	0.118493
ENSG00000154710-RABGEF1	29.8528	0.825786	0.353708	2.33466	0.0195614	0.118587
ENSG00000272746-AP005131.7	14.5589	1.19795	0.51334	2.33365	0.0196143	0.118831
ENSG00000249286-AMD1P3	27.2594	-0.905887	0.388372	-2.33252	0.0196731	0.119112
ENSG00000112984-KIF20A	30.8001	-0.818696	0.35133	-2.33028	0.0197916	0.119753
ENSG00000125991-ERGIC3	81.4489	0.509547	0.218772	2.32913	0.0198524	0.120045
ENSG00000119778-ATAD2B	91.0816	0.498152	0.214053	2.32724	0.0199526	0.120575
ENSG00000125454-SLC25A19	23.9071	-0.935021	0.402133	-2.32515	0.0200637	0.121135
ENSG00000234337-AC026462.1	15.2328	-1.17321	0.504601	-2.32503	0.0200706	0.121135
ENSG00000073712-FERMT2	27.9967	-0.871369	0.374922	-2.32414	0.0201181	0.121268
ENSG00000244313-AC024293.1	887.129	0.234617	0.100944	2.32422	0.0201137	0.121268
ENSG00000127946-HIP1	14.5634	1.19154	0.513095	2.32226	0.020219	0.121799
ENSG00000121851-POLR3GL	56.3921	0.610757	0.263304	2.31959	0.0203631	0.12259
ENSG00000087191-PSMC5	210.526	-0.339522	0.146443	-2.31845	0.0204247	0.122883
ENSG00000213553-RPLP0P6	468.534	0.235962	0.101804	2.31782	0.0204591	0.123013
ENSG00000110107-PRPF19	148.799	-0.4062	0.1753	-2.31717	0.0204943	0.123146
ENSG00000071462-BUD23	109.881	-0.456018	0.196822	-2.3169	0.0205091	0.123158
ENSG00000170581-STAT2	16.9831	1.1736	0.506832	2.31556	0.0205824	0.123521
ENSG00000116001-TIA1	97.4729	0.479641	0.207267	2.31412	0.0206613	0.123894
ENSG00000123342-MMP19	14.7042	1.29056	0.55773	2.31395	0.0206706	0.123894
ENSG00000173992-CCS	22.0473	0.955018	0.412805	2.31348	0.0206961	0.123969
ENSG00000237550-RPL9P9	776.838	0.231502	0.100106	2.31256	0.0207468	0.124195
ENSG00000102977-ACD	60.2016	-0.628683	0.271904	-2.31215	0.0207696	0.124253
ENSG00000165819-METTL3	71.7203	0.542507	0.234787	2.31063	0.0208533	0.124676
ENSG00000148672-GLUD1	65.7903	-0.566251	0.245172	-2.3096	0.0209102	0.124937
ENSG00000113407-TARS	267.737	-0.305185	0.132232	-2.30794	0.0210023	0.125382
ENSG00000153048-CARHSP1	54.2634	-0.668315	0.289591	-2.30779	0.0210109	0.125382
ENSG00000143653-SCCPDH	111.27	-0.436089	0.188984	-2.30755	0.0210244	0.125384
ENSG00000153140-CETN3	288.855	-0.302393	0.131094	-2.30669	0.0210724	0.125513
ENSG00000174437-ATP2A2	113.393	-0.426781	0.185001	-2.30692	0.0210595	0.125513
ENSG00000280778-AC243547.3	95.2146	-0.494788	0.21453	-2.30638	0.0210895	0.125537
ENSG00000237441-RGL2	19.1125	1.09434	0.47466	2.30552	0.0211374	0.125744
ENSG00000120008-WDR11	33.6487	0.767535	0.332989	2.30499	0.0211674	0.125844
ENSG00000125514-LINC00029	14.0349	1.30259	0.565222	2.30456	0.0211914	0.125908
ENSG00000125124-BBS2	20.6653	1.01014	0.438389	2.30421	0.0212106	0.125928
ENSG00000141456-PELP1	65.7546	-0.579309	0.251433	-2.30403	0.0212212	0.125928
ENSG00000024526-DEPDC1	40.8797	-0.742256	0.322332	-2.30277	0.0212919	0.126269
ENSG00000107949-BCCIP	135.355	-0.427967	0.185915	-2.30195	0.0213382	0.126308
ENSG00000135972-MRPS9	82.0734	-0.519609	0.225713	-2.30208	0.0213304	0.126308
ENSG00000138346-DNA2	16.2669	-1.15117	0.500053	-2.30209	0.0213302	0.126308
ENSG00000204351-SKIV2L	66.513	0.569435	0.247427	2.30142	0.0213677	0.126404
ENSG00000186481-ANKRD20A5P	38.1893	0.736347	0.320082	2.30049	0.0214202	0.126637
ENSG00000122033-MTIF3	67.4748	-0.552726	0.24039	-2.29929	0.0214884	0.126961
ENSG00000162924-REL	74.5006	-0.55465	0.241288	-2.2987	0.0215217	0.127079
ENSG00000280634-THRIL	15.3374	-1.25137	0.544457	-2.29838	0.0215401	0.127109
ENSG00000084092-NOA1	53.4273	0.623004	0.271221	2.29703	0.0216168	0.127481
ENSG00000245532-NEAT1	171.717	0.371597	0.161788	2.29681	0.0216298	0.127481
ENSG00000138434-ITPRID2	48.0813	-0.67184	0.292612	-2.29601	0.0216753	0.12767
ENSG00000105856-HBP1	36.7226	0.792026	0.345017	2.29562	0.0216979	0.127708
ENSG00000120800-UTP20	36.3233	-0.747299	0.325593	-2.2952	0.0217218	0.127708
ENSG00000204482-LST1	15.9825	-1.20596	0.525401	-2.29531	0.0217151	0.127708
ENSG00000056050-HPF1	44.6942	-0.680653	0.296709	-2.29401	0.0217898	0.128029
ENSG00000012061-ERCC1	86.8664	-0.489998	0.213669	-2.29326	0.0218332	0.128204
ENSG00000279557-AC010435.1	34.324	-0.801584	0.349658	-2.29248	0.0218779	0.128388
ENSG00000178966-RMI1	26.4135	-0.87681	0.382724	-2.29098	0.0219649	0.128819
ENSG00000129353-SLC44A2	44.8272	0.686764	0.299876	2.29016	0.022012	0.129016
ENSG00000218227-AC136632.1	208.624	0.411496	0.179783	2.28885	0.0220878	0.129381
ENSG00000149929-HIRIP3	45.8825	-0.671399	0.2934	-2.28834	0.022118	0.129478
ENSG00000067365-METTL22	27.8399	0.873603	0.381806	2.28808	0.022133	0.129487
ENSG00000162889-MAPKAPK2	47.5168	0.694832	0.303771	2.28735	0.0221751	0.129654
ENSG00000151287-TEX30	18.49	-1.1007	0.481611	-2.28545	0.0222866	0.130226
ENSG00000132016-C19orf57	15.5879	-1.16603	0.510375	-2.28466	0.0223327	0.130345
ENSG00000179588-ZFPM1	14.6106	1.18656	0.519399	2.2845	0.0223424	0.130345
ENSG00000249222-ATP5MGL	17.8791	1.10533	0.483858	2.2844	0.0223479	0.130345
ENSG00000243960-AL390195.1	37.344	-0.751284	0.328933	-2.284	0.0223715	0.130403
ENSG00000140538-NTRK3	18.3724	1.12768	0.493859	2.28341	0.0224062	0.130525
ENSG00000144746-ARL6IP5	98.661	0.461525	0.202311	2.28127	0.0225325	0.131181
ENSG00000155858-LSM11	13.9921	-1.25277	0.549429	-2.28014	0.0225995	0.13149
ENSG00000283795-MIR4426	44.1139	0.748606	0.328366	2.27979	0.02262	0.13153
ENSG00000182899-RPL35A	1527.25	0.159838	0.0701206	2.27947	0.0226393	0.131561
ENSG00000197345-MRPL21	233.633	-0.34644	0.152038	-2.27865	0.0226879	0.131764
ENSG00000108651-UTP6	64.171	-0.644996	0.283169	-2.27778	0.02274	0.131986
ENSG00000135637-CCDC142	92.7344	0.472166	0.207328	2.27739	0.0227632	0.132041
ENSG00000066583-ISOC1	36.936	-0.741397	0.325681	-2.27645	0.0228192	0.132243
ENSG00000100138-SNU13	221.606	-0.322223	0.141553	-2.27634	0.0228258	0.132243
ENSG00000119326-CTNNAL1	71.4689	-0.529996	0.232894	-2.27569	0.0228643	0.132305
ENSG00000174282-ZBTB4	34.0832	0.765489	0.336347	2.27589	0.0228524	0.132305
ENSG00000257923-CUX1	134.93	0.417551	0.183519	2.27524	0.0228914	0.132382
ENSG00000084774-CAD	80.3023	-0.501323	0.220479	-2.2738	0.0229783	0.132803
ENSG00000259529-AL136295.5	33.1356	0.790321	0.347657	2.27328	0.0230095	0.132904
ENSG00000148688-RPP30	71.3955	-0.545396	0.239942	-2.27303	0.0230243	0.132909
ENSG00000139350-NEDD1	85.26	-0.496961	0.218761	-2.2717	0.0231044	0.133188
ENSG00000170606-HSPA4	211.551	-0.332805	0.146511	-2.27154	0.0231145	0.133188
ENSG00000232346-Z74021.1	289.401	0.303456	0.133572	2.27186	0.0230952	0.133188
ENSG00000079134-THOC1	81.9437	-0.495859	0.218363	-2.2708	0.023159	0.133364
ENSG00000213300-HNRNPA3P6	46.1024	-0.714652	0.314779	-2.27033	0.0231877	0.133373
ENSG00000270898-GPR75-ASB3	79.7602	0.519079	0.228638	2.27031	0.0231887	0.133373
ENSG00000116205-TCEANC2	27.0493	0.851741	0.375576	2.26782	0.0233399	0.134162
ENSG00000197343-ZNF655	58.6316	0.578214	0.255032	2.26722	0.0233767	0.134293
ENSG00000137210-TMEM14B	86.1791	-0.520182	0.229648	-2.26513	0.0235046	0.134865
ENSG00000142539-AC020909.1	14.7339	-1.22836	0.542263	-2.26525	0.0234975	0.134865
ENSG00000100023-PPIL2	52.729	0.646498	0.285526	2.26424	0.0235596	0.134937
ENSG00000137154-RPS6	4394.45	0.143282	0.0632779	2.26433	0.0235541	0.134937
ENSG00000185129-PURA	244.154	-0.339939	0.150126	-2.26436	0.0235522	0.134937
ENSG00000100664-EIF5	287.916	-0.278958	0.123329	-2.26189	0.023704	0.135683
ENSG00000169139-UBE2V2	112.636	-0.436047	0.1928	-2.26166	0.0237185	0.135685
ENSG00000124789-NUP153	40.4322	-0.711964	0.314831	-2.26142	0.0237332	0.135688
ENSG00000087269-NOP14	194.642	-0.337394	0.149375	-2.25871	0.0239017	0.136569
ENSG00000188636-RTL6	20.6715	1.01489	0.449649	2.25708	0.0240032	0.137067
ENSG00000147324-MFHAS1	17.9868	-1.05279	0.466604	-2.25628	0.0240528	0.137186
ENSG00000180667-YOD1	21.0261	1.02562	0.454524	2.25647	0.0240411	0.137186
ENSG00000077312-SNRPA	80.3099	-0.496715	0.220221	-2.25553	0.0241003	0.137293
ENSG00000235508-RPS2P7	82.7204	0.492545	0.218351	2.25575	0.0240862	0.137293
ENSG00000064607-SUGP2	170.213	0.390015	0.173009	2.2543	0.024177	0.137402
ENSG00000132002-DNAJB1	66.6602	-0.552581	0.245109	-2.25443	0.0241692	0.137402
ENSG00000147684-NDUFB9	619.571	-0.227503	0.100901	-2.25471	0.0241517	0.137402
ENSG00000159593-NAE1	134.712	-0.39921	0.177069	-2.25455	0.0241616	0.137402
ENSG00000132424-PNISR	339.927	0.281109	0.124746	2.25346	0.02423	0.13762
ENSG00000125482-TTF1	165.558	-0.35677	0.158371	-2.25275	0.0242752	0.137795
ENSG00000169857-AVEN	20.6901	-0.978415	0.434797	-2.25028	0.024431	0.138515
ENSG00000231607-DLEU2	52.9865	-0.623553	0.277073	-2.2505	0.0244175	0.138515
ENSG00000196756-SNHG17	134.217	-0.385705	0.171488	-2.24917	0.0245019	0.138834
ENSG00000051341-POLQ	23.3447	-1.00758	0.448225	-2.24793	0.0245806	0.139198
ENSG00000235724-AC009299.3	16.5913	1.10731	0.49287	2.24666	0.024662	0.139576
ENSG00000173064-HECTD4	33.7023	0.759615	0.338186	2.24615	0.0246947	0.139678
ENSG00000123213-NLN	37.319	-0.73629	0.328058	-2.24439	0.0248072	0.139953
ENSG00000134569-LRP4	23.7219	-0.917966	0.409009	-2.24437	0.0248088	0.139953
ENSG00000135686-KLHL36	19.1341	1.024	0.456174	2.24476	0.0247834	0.139953
ENSG00000157379-DHRS1	28.783	0.85776	0.382204	2.24424	0.0248167	0.139953
ENSG00000257379-AC023509.1	51.1685	-0.633244	0.282063	-2.24504	0.0247654	0.139953
ENSG00000141522-ARHGDIA	111.557	-0.425104	0.189461	-2.24375	0.0248483	0.140011
ENSG00000175061-LRRC75A-AS1	554.902	0.246125	0.1097	2.24363	0.0248563	0.140011
ENSG00000167671-UBXN6	48.0035	0.664055	0.296048	2.24307	0.0248926	0.140133
ENSG00000169740-ZNF32	19.379	1.02415	0.456688	2.24256	0.0249252	0.140234
ENSG00000258554-AC025162.1	40.023	-0.730919	0.326164	-2.24095	0.025029	0.140735
ENSG00000182141-ZNF708	30.9415	0.788604	0.352134	2.2395	0.0251233	0.141182
ENSG00000183605-SFXN4	59.6746	-0.607135	0.271231	-2.23845	0.025192	0.141484
ENSG00000240509-RPL34P18	301.927	0.295501	0.132034	2.23807	0.0252167	0.14154
ENSG00000188938-FAM120AOS	194.91	0.339663	0.151939	2.23553	0.0253827	0.142388
ENSG00000074696-HACD3	177.906	-0.355403	0.159075	-2.23419	0.0254709	0.142738
ENSG00000089009-RPL6	1227.86	0.176029	0.0787911	2.23412	0.025475	0.142738
ENSG00000117118-SDHB	65.8989	-0.565094	0.253086	-2.23282	0.0255609	0.143096
ENSG00000226245-ZNF32-AS1	17.3635	1.07215	0.480203	2.2327	0.025569	0.143096
ENSG00000110200-ANAPC15	79.0868	-0.506474	0.226907	-2.23208	0.0256098	0.143157
ENSG00000185163-DDX51	39.9093	-0.69877	0.313058	-2.23208	0.0256096	0.143157
ENSG00000180370-PAK2	128.356	-0.415637	0.186324	-2.23072	0.0256997	0.143575
ENSG00000103091-WDR59	95.037	0.457764	0.205517	2.22738	0.0259219	0.144732
ENSG00000151422-FER	49.3635	0.622521	0.279554	2.22683	0.0259584	0.144851
ENSG00000242071-RPL7AP6	370.045	0.25061	0.112576	2.22615	0.0260039	0.14502
ENSG00000070476-ZXDC	24.9193	0.859262	0.386257	2.22458	0.0261091	0.145259
ENSG00000139718-SETD1B	46.1549	0.65996	0.296648	2.22473	0.0260996	0.145259
ENSG00000144231-POLR2D	86.8547	-0.485012	0.218044	-2.22438	0.026123	0.145259
ENSG00000152117-AC073869.1	104.975	-0.494903	0.22241	-2.22518	0.0260691	0.145259
ENSG00000180902-D2HGDH	34.9439	0.727137	0.326803	2.225	0.0260811	0.145259
ENSG00000167005-NUDT21	170.711	-0.443042	0.199359	-2.22233	0.0262608	0.145856
ENSG00000250186-AC091180.3	138.274	-0.378741	0.17041	-2.22253	0.0262472	0.145856
ENSG00000103168-TAF1C	85.5303	0.487505	0.21948	2.22119	0.0263384	0.146117
ENSG00000184924-PTRHD1	80.6881	0.489586	0.220405	2.2213	0.0263307	0.146117
ENSG00000148153-INIP	34.7106	-0.775885	0.349508	-2.21993	0.0264234	0.146418
ENSG00000175550-DRAP1	67.6313	-0.527732	0.237719	-2.21998	0.0264202	0.146418
ENSG00000120539-MASTL	15.042	-1.30429	0.587609	-2.21966	0.0264417	0.146424
ENSG00000122545-39326	313.793	-0.272123	0.12262	-2.21924	0.0264705	0.146424
__not_aligned-	197252	0.177105	0.0797973	2.21943	0.0264574	0.146424
ENSG00000126524-SBDS	47.9182	-0.640267	0.288856	-2.21656	0.0266531	0.147349
ENSG00000184110-EIF3C	328.661	-0.27355	0.123429	-2.21625	0.0266741	0.147379
ENSG00000115761-NOL10	70.3782	-0.532236	0.240233	-2.2155	0.0267256	0.147579
ENSG00000125450-NUP85	120.445	-0.426169	0.192572	-2.21303	0.0268953	0.148358
ENSG00000285505-AC010616.2	27.6534	0.84505	0.381858	2.213	0.0268979	0.148358
ENSG00000179222-MAGED1	212.906	0.31466	0.14221	2.21264	0.0269226	0.148409
ENSG00000177606-JUN	40.0921	0.708797	0.320405	2.21219	0.0269536	0.148494
ENSG00000167258-CDK12	182.443	-0.349211	0.157888	-2.21177	0.0269825	0.148567
ENSG00000134049-IER3IP1	59.0515	-0.567882	0.256822	-2.21119	0.0270225	0.148616
ENSG00000186166-CCDC84	332.095	0.278069	0.125749	2.21129	0.0270154	0.148616
ENSG00000257093-KIAA1147	14.7223	1.20429	0.544742	2.21076	0.0270525	0.148695
ENSG00000007255-TRAPPC6A	48.2167	0.622804	0.281886	2.20942	0.0271454	0.148937
ENSG00000101266-CSNK2A1	180.615	-0.337456	0.152748	-2.20923	0.0271589	0.148937
ENSG00000186432-KPNA4	71.491	-0.531232	0.240428	-2.20953	0.0271379	0.148937
ENSG00000265401-AC093484.3	503.139	-0.237667	0.107567	-2.20947	0.0271416	0.148937
ENSG00000143314-MRPL24	61.3891	-0.558606	0.252889	-2.2089	0.0271819	0.148977
ENSG00000119682-AREL1	37.657	0.71048	0.32184	2.20755	0.0272754	0.149404
ENSG00000078304-PPP2R5C	364.453	0.252112	0.114328	2.20517	0.0274422	0.150231
ENSG00000009694-TENM1	15.6826	1.08713	0.493412	2.20328	0.0275749	0.150871
ENSG00000108788-MLX	65.0155	-0.546757	0.248315	-2.20187	0.0276748	0.151331
ENSG00000076554-TPD52	47.6818	-0.649706	0.295238	-2.20062	0.027763	0.151466
ENSG00000116898-MRPS15	177.084	-0.348169	0.158201	-2.2008	0.0277502	0.151466
ENSG00000181026-AEN	33.8532	-0.776495	0.352848	-2.20065	0.0277607	0.151466
ENSG00000238103-RPL9P7	403.223	0.287145	0.13046	2.20102	0.0277347	0.151466
ENSG00000213420-GPC2	16.7037	1.04786	0.476246	2.20025	0.0277893	0.151523
ENSG00000111237-VPS29	80.6877	-0.489011	0.222294	-2.19984	0.0278181	0.151594
ENSG00000122484-RPAP2	111.46	0.419924	0.191021	2.19832	0.0279266	0.152024
ENSG00000134809-TIMM10	133.754	-0.390417	0.177619	-2.19806	0.0279449	0.152024
ENSG00000179950-PUF60	59.6134	-0.555156	0.252563	-2.19809	0.0279427	0.152024
ENSG00000063660-GPC1	51.3941	-0.612957	0.279088	-2.19629	0.0280713	0.152625
ENSG00000263244-AC087190.3	38.4155	0.713395	0.325177	2.19386	0.0282452	0.153483
ENSG00000185608-MRPL40	56.9729	0.601818	0.274442	2.19288	0.028316	0.15378
ENSG00000122417-ODF2L	52.9114	0.613211	0.279785	2.19172	0.0283997	0.154147
ENSG00000267165-CHMP1B-AS1	16.2113	1.10757	0.505428	2.19136	0.028426	0.154202
ENSG00000014138-POLA2	47.369	-0.67009	0.305965	-2.19009	0.0285179	0.154561
ENSG00000149313-AASDHPPT	63.7109	-0.544318	0.248548	-2.18999	0.0285246	0.154561
ENSG00000129534-MIS18BP1	66.7181	-0.56992	0.260289	-2.18956	0.0285558	0.154642
ENSG00000100997-ABHD12	22.2879	-0.941112	0.43029	-2.18716	0.0287311	0.155415
ENSG00000144134-RABL2A	20.1065	0.981586	0.448782	2.18722	0.0287263	0.155415
ENSG00000163374-YY1AP1	59.8095	0.585073	0.267661	2.18588	0.0288245	0.155832
ENSG00000013275-PSMC4	225.375	-0.313121	0.143341	-2.18445	0.0289289	0.156131
ENSG00000087338-GMCL1	84.0875	-0.497109	0.227543	-2.18468	0.0289125	0.156131
ENSG00000103740-ACSBG1	164.062	-0.348029	0.159309	-2.18461	0.0289172	0.156131
ENSG00000166337-TAF10	93.1706	0.451243	0.206642	2.18369	0.0289848	0.156344
ENSG00000106144-CASP2	194.955	-0.325448	0.149054	-2.18343	0.0290041	0.15636
ENSG00000163166-IWS1	209.075	-0.311378	0.142634	-2.18306	0.0290315	0.156392
ENSG00000262413-AC145207.2	110.775	-0.415203	0.190207	-2.18291	0.0290428	0.156392
ENSG00000144674-GOLGA4	345.766	0.260151	0.119211	2.18227	0.0290895	0.156555
ENSG00000182628-SKA2	144.119	-0.36763	0.16857	-2.18088	0.0291922	0.157019
ENSG00000083799-CYLD	21.2759	0.934137	0.428547	2.17978	0.029274	0.157193
ENSG00000126777-KTN1	568.081	-0.206531	0.0947474	-2.17981	0.0292719	0.157193
ENSG00000178458-H3F3AP6	169.662	0.367934	0.168783	2.17993	0.0292628	0.157193
ENSG00000259746-HSPE1P3	64.2011	-0.562724	0.258409	-2.17765	0.0294318	0.157952
ENSG00000131148-EMC8	108.413	-0.411873	0.189157	-2.17742	0.0294496	0.157958
ENSG00000139921-TMX1	85.7619	-0.502733	0.230995	-2.17638	0.0295267	0.158194
ENSG00000225528-Z82206.1	23.8109	0.86246	0.396273	2.17643	0.0295232	0.158194
ENSG00000141582-CBX4	74.9394	-0.499632	0.229675	-2.17539	0.0296012	0.158505
ENSG00000069943-PIGB	16.4078	1.07404	0.493842	2.17487	0.0296397	0.158621
ENSG00000132716-DCAF8	143.067	0.380362	0.174937	2.17428	0.0296843	0.158771
ENSG00000137411-VARS2	82.6737	-0.534957	0.246111	-2.17364	0.029732	0.158848
ENSG00000269293-ZSCAN16-AS1	78.5198	0.491866	0.226271	2.17379	0.0297207	0.158848
ENSG00000133318-RTN3	194.401	-0.328089	0.150971	-2.17319	0.0297658	0.15894
ENSG00000110344-UBE4A	117.939	0.4105	0.188937	2.17268	0.0298041	0.158966
ENSG00000158109-TPRG1L	19.9963	0.980673	0.451359	2.17271	0.0298021	0.158966
ENSG00000137720-C11orf1	41.7155	0.676199	0.311281	2.17231	0.0298325	0.159029
ENSG00000089057-SLC23A2	23.1286	-0.87671	0.403897	-2.17063	0.0299592	0.159526
ENSG00000180817-PPA1	167.53	-0.345624	0.159226	-2.17065	0.0299578	0.159526
ENSG00000034510-TMSB10	458.356	0.238113	0.109739	2.16982	0.0300205	0.159585
ENSG00000103550-KNOP1	167.169	-0.414408	0.190986	-2.16983	0.0300199	0.159585
ENSG00000141994-DUS3L	37.4863	-0.689918	0.317941	-2.16995	0.0300103	0.159585
ENSG00000166912-MTMR10	70.457	0.517298	0.23857	2.16833	0.0301339	0.160099
ENSG00000035687-ADSS	61.6231	-0.55675	0.256853	-2.16758	0.0301907	0.160133
ENSG00000115234-SNX17	72.8243	0.508864	0.234741	2.16777	0.0301763	0.160133
ENSG00000227615-AP001324.1	337.572	0.289362	0.133489	2.16768	0.0301833	0.160133
ENSG00000102934-PLLP	63.233	0.556688	0.256894	2.16699	0.0302354	0.160281
ENSG00000094880-CDC23	37.677	-0.745247	0.344028	-2.16624	0.030293	0.160467
ENSG00000139083-ETV6	23.3432	0.869804	0.401595	2.16587	0.0303209	0.160467
ENSG00000260280-SLX1B-SULT1A4	31.182	0.779904	0.360081	2.16591	0.0303179	0.160467
ENSG00000101003-GINS1	38.9447	-0.742849	0.343047	-2.16545	0.0303536	0.160551
ENSG00000059145-UNKL	27.2742	0.828589	0.382748	2.16484	0.0303999	0.160707
ENSG00000186812-ZNF397	73.3359	0.507745	0.23457	2.16458	0.03042	0.160724
ENSG00000131943-C19orf12	20.4973	0.925772	0.428006	2.16299	0.030542	0.161279
ENSG00000188452-CERKL	86.8661	-0.47234	0.218528	-2.16146	0.0306597	0.161811
ENSG00000081059-TCF7	677.718	0.199228	0.092205	2.16071	0.030718	0.161886
ENSG00000100243-CYB5R3	120.596	-0.39413	0.182416	-2.16062	0.0307248	0.161886
ENSG00000101187-SLCO4A1	19.4916	-0.996321	0.461087	-2.16081	0.0307102	0.161886
ENSG00000144320-LNPK	45.7168	-0.619895	0.286938	-2.16038	0.0307432	0.161894
ENSG00000125686-MED1	215.625	-0.330911	0.153213	-2.15981	0.0307872	0.161947
ENSG00000126215-XRCC3	17.9739	-1.02328	0.47377	-2.15987	0.0307826	0.161947
ENSG00000124225-PMEPA1	192.325	-0.349728	0.161979	-2.1591	0.0308428	0.16215
ENSG00000116209-TMEM59	84.7717	0.484482	0.224433	2.15869	0.0308741	0.162225
ENSG00000244879-GABPB1-AS1	133.737	0.440172	0.204018	2.15751	0.0309658	0.162617
ENSG00000196247-ZNF107	77.235	0.478925	0.222078	2.15656	0.0310397	0.162916
ENSG00000160193-WDR4	70.2637	-0.520531	0.24143	-2.15603	0.0310813	0.163044
ENSG00000214706-IFRD2	28.2845	-0.85681	0.397619	-2.15485	0.0311733	0.163437
ENSG00000181513-ACBD4	23.9523	0.877399	0.407337	2.15399	0.0312413	0.163704
ENSG00000178802-MPI	35.5931	0.710125	0.330037	2.15165	0.0314247	0.164574
ENSG00000173273-TNKS	22.6244	0.879298	0.408812	2.15086	0.0314872	0.164811
ENSG00000146938-NLGN4X	31.6628	0.746327	0.347109	2.15012	0.0315457	0.164956
ENSG00000229994-RPL5P4	193.772	0.314446	0.146249	2.15007	0.0315494	0.164956
ENSG00000158805-ZNF276	62.289	-0.593195	0.276052	-2.14885	0.031646	0.165288
ENSG00000182472-CAPN12	142.407	-0.398748	0.185565	-2.14883	0.0316476	0.165288
ENSG00000215712-TMEM242	15.2326	1.11828	0.520589	2.14811	0.0317049	0.165497
ENSG00000049239-H6PD	16.1655	1.13113	0.526773	2.14727	0.0317715	0.165754
ENSG00000103111-MON1B	85.7249	0.459966	0.214361	2.14576	0.0318925	0.166113
ENSG00000169710-FASN	118.089	-0.40335	0.187969	-2.14583	0.0318867	0.166113
ENSG00000185619-PCGF3	99.1194	0.432299	0.201429	2.14616	0.0318602	0.166113
ENSG00000159579-RSPRY1	53.4863	0.580654	0.270707	2.14495	0.0319567	0.166356
ENSG00000100479-POLE2	26.9895	-0.850744	0.396803	-2.144	0.0320332	0.166663
ENSG00000173848-NET1	48.2925	-0.711744	0.332055	-2.14345	0.032077	0.166801
ENSG00000105755-ETHE1	34.0395	0.751611	0.350719	2.14306	0.0321084	0.166873
ENSG00000140650-PMM2	68.6936	-0.541014	0.252482	-2.14279	0.0321303	0.166896
ENSG00000114686-MRPL3	101.459	-0.451616	0.210785	-2.14255	0.0321495	0.166905
ENSG00000144589-STK11IP	25.6756	0.84473	0.394595	2.14075	0.032294	0.167564
ENSG00000068796-KIF2A	159.648	-0.363893	0.170108	-2.13918	0.032421	0.167949
ENSG00000178105-DDX10	101.673	-0.458219	0.214189	-2.13932	0.0324099	0.167949
ENSG00000263276-AC020978.7	166.177	-0.342905	0.160281	-2.1394	0.0324031	0.167949
ENSG00000005175-RPAP3	73.063	-0.48772	0.22805	-2.13866	0.0324634	0.167986
ENSG00000170089-AC106795.1	83.1721	-0.59684	0.279056	-2.13878	0.0324533	0.167986
ENSG00000231527-CR769775.1	29.0404	0.792869	0.370783	2.13837	0.0324871	0.168017
ENSG00000134318-ROCK2	67.3788	-0.523598	0.244907	-2.13795	0.0325208	0.168101
ENSG00000264281-AC016596.1	32.1624	0.80422	0.376254	2.13744	0.032562	0.168222
ENSG00000108773-KAT2A	58.9086	0.550317	0.257505	2.13711	0.0325888	0.168224
ENSG00000203668-CHML	27.9099	-0.845716	0.395748	-2.13701	0.0325976	0.168224
ENSG00000136930-PSMB7	377.225	-0.289342	0.135525	-2.13497	0.0327634	0.168859
ENSG00000171222-SCAND1	18.697	0.96397	0.451462	2.13522	0.0327431	0.168859
ENSG00000204253-HNRNPCP2	47.9186	-0.619494	0.290183	-2.13484	0.0327738	0.168859
ENSG00000115204-MPV17	49.9581	0.590456	0.276695	2.13396	0.032846	0.16914
ENSG00000182831-C16orf72	88.5595	0.449545	0.210695	2.13362	0.0328735	0.16919
ENSG00000196449-YRDC	37.3809	-0.75305	0.353022	-2.13315	0.0329123	0.169299
ENSG00000118263-KLF7	55.9872	0.57249	0.268433	2.13271	0.0329487	0.169304
ENSG00000172986-GXYLT2	100.55	-0.42247	0.198087	-2.13275	0.0329451	0.169304
ENSG00000102409-BEX4	52.5339	0.575129	0.269787	2.13179	0.0330239	0.169599
ENSG00000188690-UROS	26.6236	0.822173	0.385731	2.13147	0.0330505	0.169644
ENSG00000235559-NOP56P1	26.2856	-0.82055	0.385029	-2.13114	0.0330776	0.169691
ENSG00000136159-NUDT15	23.0766	-0.909298	0.426981	-2.1296	0.033205	0.170254
ENSG00000157326-DHRS4	65.4034	-0.532533	0.250095	-2.12932	0.0332278	0.170279
ENSG00000134371-CDC73	179.481	0.327754	0.153957	2.12886	0.0332655	0.17029
ENSG00000213626-LBH	40.4694	0.661896	0.310913	2.12888	0.033264	0.17029
ENSG00000070413-DGCR2	28.4963	0.767486	0.36102	2.12589	0.0335128	0.171463
ENSG00000150991-UBC	367.504	-0.253223	0.119135	-2.12551	0.0335438	0.17153
ENSG00000235225-AC016712.1	30.8399	0.741573	0.349091	2.1243	0.0336454	0.171957
ENSG00000116138-DNAJC16	22.0571	0.874403	0.411819	2.12327	0.0337313	0.172304
ENSG00000108588-CCDC47	69.7991	-0.518743	0.24456	-2.12112	0.0339113	0.173131
ENSG00000147679-UTP23	86.8794	-0.496921	0.234364	-2.1203	0.0339809	0.173328
ENSG00000167202-TBC1D2B	36.9525	0.680496	0.320986	2.12002	0.0340044	0.173328
ENSG00000183431-SF3A3	166.724	-0.34483	0.16264	-2.1202	0.0339894	0.173328
ENSG00000029725-RABEP1	161.515	-0.338169	0.159585	-2.11905	0.034086	0.173559
ENSG00000033867-SLC4A7	108.346	0.402136	0.189759	2.11919	0.0340745	0.173559
ENSG00000174013-FBXO45	52.2528	-0.567561	0.267925	-2.11836	0.0341448	0.173765
ENSG00000102241-HTATSF1	120.677	-0.423341	0.200016	-2.11653	0.0342997	0.173955
ENSG00000112146-FBXO9	93.6109	0.440843	0.208382	2.11555	0.0343827	0.173955
ENSG00000112294-ALDH5A1	98.2496	0.435868	0.205897	2.11693	0.0342662	0.173955
ENSG00000113648-H2AFY	216.711	-0.310294	0.146575	-2.11696	0.0342632	0.173955
ENSG00000116237-ICMT	43.4918	-0.657986	0.311	-2.11571	0.0343696	0.173955
ENSG00000117593-DARS2	19.1642	-0.938752	0.443617	-2.11613	0.0343337	0.173955
ENSG00000138433-CIR1	176.013	0.32823	0.15513	2.11584	0.0343588	0.173955
ENSG00000149657-LSM14B	49.3343	-0.61162	0.289102	-2.11559	0.03438	0.173955
ENSG00000159128-IFNGR2	14.5806	-1.13803	0.537651	-2.11667	0.0342876	0.173955
ENSG00000170264-FAM161A	30.8255	-0.73941	0.349502	-2.11561	0.034378	0.173955
ENSG00000263126-AC040162.3	75.5876	-0.527428	0.249147	-2.11693	0.0342655	0.173955
ENSG00000135951-TSGA10	17.0212	1.05033	0.49664	2.11488	0.0344403	0.174155
ENSG00000117543-DPH5	35.1487	0.684342	0.323688	2.11421	0.0344977	0.174352
ENSG00000180011-ZADH2	14.2004	1.13088	0.534991	2.11383	0.0345299	0.174423
ENSG00000120756-PLS1	21.7637	-0.876047	0.414817	-2.11189	0.034696	0.175169
ENSG00000119242-CCDC92	18.2644	0.963365	0.45621	2.11167	0.0347146	0.17517
ENSG00000259431-THTPA	42.9808	0.633982	0.300274	2.11135	0.0347424	0.175218
ENSG00000216937-CCDC7	21.4558	0.902065	0.427338	2.11089	0.0347814	0.175322
ENSG00000214653-HNRNPA3P3	16.2358	-1.05478	0.499798	-2.11041	0.0348228	0.175438
ENSG00000105401-CDC37	302.787	-0.260069	0.123301	-2.10922	0.0349255	0.175769
ENSG00000265936-AC091042.1	208.06	0.317694	0.150614	2.10932	0.0349168	0.175769
ENSG00000198001-IRAK4	52.5292	0.569192	0.269889	2.10899	0.0349458	0.175779
ENSG00000074071-MRPS34	172.674	-0.361811	0.171642	-2.10793	0.0350367	0.176143
ENSG00000173575-CHD2	380.791	0.284532	0.134998	2.10768	0.0350586	0.176161
ENSG00000038358-EDC4	74.8392	-0.525332	0.249313	-2.10712	0.0351069	0.176311
ENSG00000162923-WDR26	66.5419	0.555078	0.263617	2.10562	0.0352376	0.176781
ENSG00000198805-PNP	55.0416	-0.56693	0.26922	-2.10583	0.0352193	0.176781
ENSG00000120256-LRP11	16.9568	-1.01506	0.482371	-2.10432	0.0353505	0.177254
ENSG00000129355-CDKN2D	19.2537	-0.972619	0.462304	-2.10385	0.0353914	0.177366
ENSG00000124614-RPS10	1493.97	0.156959	0.0746486	2.10264	0.0354975	0.177758
ENSG00000157741-UBN2	74.4177	0.512141	0.243584	2.10253	0.0355069	0.177758
ENSG00000176563-CNTD1	104.04	0.409098	0.194667	2.10153	0.0355944	0.178039
ENSG00000213315-AL122020.1	73.6964	0.488172	0.232301	2.10146	0.0356003	0.178039
ENSG00000284966-AL138689.2	34.0545	0.765451	0.364307	2.10112	0.0356306	0.178097
ENSG00000253738-OTUD6B-AS1	76.3337	0.475596	0.22644	2.10032	0.035701	0.178355
ENSG00000198039-ZNF273	19.6285	-0.945726	0.450543	-2.09908	0.0358097	0.178711
ENSG00000226221-RPL26P19	318.045	0.308769	0.147096	2.09909	0.0358086	0.178711
ENSG00000138074-SLC5A6	51.3211	-0.599664	0.285928	-2.09725	0.0359712	0.179236
ENSG00000164087-POC1A	34.8693	-0.715546	0.341144	-2.09749	0.0359501	0.179236
ENSG00000273142-LINC02604	18.0544	0.970129	0.46257	2.09726	0.0359705	0.179236
ENSG00000198646-NCOA6	60.4859	-0.544918	0.259948	-2.09626	0.0360592	0.179581
ENSG00000065413-ANKRD44	19.2155	0.947359	0.45204	2.09574	0.0361051	0.179622
ENSG00000141298-SSH2	57.2369	0.541045	0.258161	2.09577	0.0361029	0.179622
ENSG00000075702-WDR62	17.8671	-1.04754	0.500172	-2.09436	0.0362281	0.18014
ENSG00000257069-KCNK4-TEX40	13.517	-1.18983	0.568286	-2.09372	0.0362845	0.180327
ENSG00000285410-GABPB1-IT1	38.8643	0.655017	0.312881	2.0935	0.0363042	0.18033
ENSG00000189091-SF3B3	65.339	-0.519656	0.24833	-2.0926	0.0363848	0.180637
ENSG00000145736-GTF2H2	53.9969	-0.575332	0.275202	-2.09058	0.0365656	0.18144
ENSG00000136448-NMT1	267.853	-0.267311	0.127917	-2.08972	0.0366431	0.181541
ENSG00000221821-C6orf226	17.0279	1.01411	0.485236	2.08992	0.0366247	0.181541
ENSG00000266302-AC098850.3	55.5026	0.547242	0.261867	2.08977	0.0366382	0.181541
ENSG00000187122-SLIT1	128.041	-0.413265	0.197852	-2.08875	0.0367301	0.181878
ENSG00000138668-HNRNPD	897.229	-0.18197	0.0871345	-2.08838	0.0367637	0.18195
ENSG00000275029-HMGB1P24	80.2782	-0.480366	0.230046	-2.08813	0.0367861	0.181966
ENSG00000141568-FOXK2	107.817	-0.422468	0.202346	-2.08785	0.0368117	0.181998
ENSG00000136122-BORA	26.8683	-0.792594	0.379679	-2.08754	0.0368396	0.182009
ENSG00000225416-AC104843.1	45.0947	0.616779	0.295477	2.0874	0.036852	0.182009
ENSG00000105220-GPI	191.316	-0.319901	0.153306	-2.08668	0.0369171	0.182142
ENSG00000177830-CHID1	55.7118	-0.544686	0.261027	-2.0867	0.036915	0.182142
ENSG00000082898-XPO1	105.677	-0.427999	0.205164	-2.08613	0.0369665	0.182291
ENSG00000133657-ATP13A3	29.5243	-0.747819	0.358602	-2.08538	0.0370353	0.182536
ENSG00000129810-SGO1	32.9537	-0.746994	0.358267	-2.08502	0.0370676	0.182602
ENSG00000100418-DESI1	46.0315	-0.594457	0.285274	-2.08381	0.0371774	0.183048
ENSG00000110274-CEP164	26.0062	0.800054	0.3842	2.08239	0.037307	0.183496
ENSG00000142192-APP	75.4062	-0.479204	0.230106	-2.08253	0.0372938	0.183496
ENSG00000134758-RNF138	55.2423	-0.577382	0.277423	-2.08124	0.0374122	0.18373
ENSG00000143106-PSMA5	58.6926	-0.588203	0.282598	-2.08141	0.037396	0.18373
ENSG00000268043-NBPF12	29.5714	0.786719	0.377986	2.08135	0.0374022	0.18373
ENSG00000135945-REV1	59.7254	-0.547255	0.263003	-2.0808	0.0374526	0.183834
ENSG00000104714-ERICH1	57.3787	0.541664	0.260358	2.08046	0.0374832	0.183889
ENSG00000265681-RPL17	627.849	0.234253	0.112614	2.08014	0.0375123	0.183938
ENSG00000109083-IFT20	43.9164	0.623754	0.299897	2.07989	0.0375356	0.183957
ENSG00000126453-BCL2L12	83.8509	-0.464181	0.223353	-2.07824	0.0376873	0.184485
ENSG00000175048-ZDHHC14	17.2566	-0.985695	0.474328	-2.07809	0.0377012	0.184485
ENSG00000239305-RNF103	22.6697	0.869875	0.418563	2.07824	0.037687	0.184485
ENSG00000164818-DNAAF5	44.7815	-0.61726	0.297095	-2.07765	0.0377415	0.184587
ENSG00000118596-SLC16A7	22.9341	-0.856946	0.41252	-2.07735	0.0377697	0.184618
ENSG00000215784-FAM72D	23.0315	-0.871	0.419322	-2.07716	0.0377865	0.184618
ENSG00000079387-SENP1	21.4877	-0.938874	0.45217	-2.07638	0.0378593	0.184879
ENSG00000283429-MIR1244-3	67.5911	-0.49876	0.240263	-2.07589	0.0379038	0.185002
ENSG00000174842-GLMN	39.2588	-0.644198	0.310507	-2.07466	0.0380176	0.185462
ENSG00000063177-RPL18	1818.21	0.16348	0.0788384	2.0736	0.038116	0.185752
ENSG00000108528-SLC25A11	77.0811	-0.519505	0.250524	-2.07367	0.03811	0.185752
ENSG00000055483-USP36	98.1021	-0.431714	0.208344	-2.07212	0.0382544	0.186236
ENSG00000133265-HSPBP1	29.0751	-0.758847	0.366208	-2.07217	0.0382493	0.186236
ENSG00000119318-RAD23B	123.602	-0.400933	0.193537	-2.07161	0.038302	0.186373
ENSG00000106399-RPA3	183.133	-0.334769	0.161623	-2.07129	0.0383319	0.186423
ENSG00000127586-CHTF18	39.8129	-0.67642	0.326724	-2.07031	0.0384234	0.186678
ENSG00000259357-AL590133.2	34.6266	-0.840152	0.405805	-2.07034	0.0384209	0.186678
ENSG00000054267-ARID4B	495.295	0.206502	0.0997584	2.07002	0.0384502	0.186713
ENSG00000170629-DPY19L2P2	19.6639	0.995298	0.480967	2.06937	0.0385117	0.186917
ENSG00000071051-NCK2	28.1342	0.848481	0.410223	2.06834	0.0386079	0.187098
ENSG00000204569-PPP1R10	178.824	0.3206	0.154988	2.06855	0.0385883	0.187098
ENSG00000258471-AL161668.3	99.3862	-0.410329	0.198383	-2.06836	0.0386058	0.187098
ENSG00000144580-CNOT9	99.6635	-0.407205	0.196969	-2.06736	0.0387003	0.187451
ENSG00000179564-LSMEM2	24.8542	-0.862675	0.417347	-2.06704	0.0387301	0.1875
ENSG00000106400-ZNHIT1	79.8005	0.475571	0.230168	2.0662	0.03881	0.187792
ENSG00000159199-ATP5MC1	187.813	-0.322695	0.156248	-2.06527	0.0388976	0.18812
ENSG00000188976-NOC2L	59.7305	-0.533043	0.258264	-2.06395	0.0390227	0.188504
ENSG00000241741-RPL7AP30	83.8481	0.443074	0.214664	2.06403	0.0390149	0.188504
ENSG00000285565-AL671762.1	237.729	0.291018	0.141011	2.0638	0.0390363	0.188504
ENSG00000143252-SDHC	197.147	0.304423	0.147523	2.06356	0.0390593	0.18852
ENSG00000126581-BECN1	115.653	0.381223	0.184904	2.06174	0.0392324	0.18926
ENSG00000196998-WDR45	18.3694	0.935771	0.453954	2.06138	0.039267	0.189297
ENSG00000215472-RPL17-C18orf32	657.948	0.233651	0.113354	2.06124	0.0392798	0.189297
ENSG00000132950-ZMYM5	19.7708	0.935126	0.453981	2.05984	0.0394142	0.189755
ENSG00000133773-CCDC59	130.313	-0.3699	0.179644	-2.05907	0.0394876	0.189755
ENSG00000138764-CCNG2	14.808	1.10771	0.537902	2.05932	0.0394635	0.189755
ENSG00000154310-TNIK	40.3389	0.681865	0.331064	2.05962	0.0394349	0.189755
ENSG00000163319-MRPS18C	156.152	-0.336719	0.163519	-2.0592	0.0394746	0.189755
ENSG00000187609-EXD3	27.1772	-0.762327	0.370279	-2.05879	0.0395141	0.189755
ENSG00000213983-AP1G2	46.2685	0.5901	0.286614	2.05887	0.0395067	0.189755
ENSG00000166436-TRIM66	29.0272	0.767996	0.373136	2.05822	0.039569	0.189923
ENSG00000213760-ATP6V1G2	15.3007	1.0237	0.497458	2.05787	0.0396027	0.189956
ENSG00000250261-CCDC74BP1	18.5217	0.943582	0.458554	2.05773	0.0396157	0.189956
ENSG00000103121-CMC2	72.7403	-0.498416	0.242343	-2.05666	0.0397194	0.190358
ENSG00000088682-COQ9	37.407	0.663588	0.322718	2.05624	0.0397591	0.190452
ENSG00000268575-AL031282.2	79.4402	0.455635	0.221711	2.05508	0.0398709	0.190892
ENSG00000164329-TENT2	40.4357	0.638776	0.310923	2.05445	0.039932	0.191089
ENSG00000254788-CKLF-CMTM1	63.1039	-0.602606	0.293492	-2.05323	0.0400508	0.191561
ENSG00000092098-RNF31	28.3721	0.765814	0.373066	2.05276	0.040096	0.191639
ENSG00000140265-ZSCAN29	62.4505	0.50509	0.246137	2.05207	0.040163	0.191639
ENSG00000162757-C1orf74	36.7878	0.66088	0.321982	2.05254	0.0401173	0.191639
[truncated: 56,742 more rows]

## Sheet: NR3C1 bound genes
NR3C1 bound genes after dexamethasone addition
697-NR3C1-genes (266)	SUPT1-NR3C1-genes (408)	overlapping genes (76)
SKI	MTOR	SMAP2
NPHP4	CROCC	AMY2B
AL357509.1	SMAP2	SLC25A38P1
STK40	SHISAL2A	GLUL
SMAP2	AL603840.1	ITPKB
AGBL4	LINC01767	CAMK1D
LINC01748	AC119674.2	DNAJB12
NEGR1	AC119674.1	AL451069.2
AMY2B	LINC01358	STIM1
AC241644.2	JAK1	FAM168A
INTS3	SLC35D1	ZBTB16
SLC25A38P1	TGFBR3	HSPA8
GLUL	AC099566.1	LINC01619
SYT2	AMY2B	CRADD
LINC02257	RAP1A	LINC00426
ITPKB	LRIG2	NFKBIA
DISC1	HIPK1	TDRD9
TSNAX-DISC1	AL512638.2	KLF13
SLC35F3	CD101	SRP14-AS1
CHRM3	BCL9	ADAMTS7P4
KIF26B	GABPB2	ISG20
WDR37	GBA	AC007220.1
GDI2	SLC25A38P1	AC135050.5
CAMK1D	GLUL	KAT8
FAM171A1	LINC01221	AC009022.1
MALRD1	RNU6-487P	PDXDC2P
RASSF4	PFKFB2	GSE1
DNAJB12	CD55	AC135782.2
TSPAN14	HHAT	P2RX1
SLC16A12	ITPKB	RAB11FIP4
SORCS3	EXOC8	GPATCH8
DOCK1	SPRTN	ANKFN1
AL451069.2	EDARADD	AC008109.1
STIM1	AKT3	LDLRAD4
LINC02546	SMYD3	KIF3C
THEM7P	DIP2C	MAP4K3
AHNAK	PITRM1-AS1	MIR4435-2HG
LRP5	PITRM1	LYPD6B
FAM168A	CAMK1D	TANC1
TSKU	PIP4K2A	SPAG16
RSF1	SELENOOLP	CU639417.3
ZBTB16	PARD3	PIK3IP1
HSPA8	CCDC6	AC092691.1
AP001122.1	DNAJB12	GSK3B
YBX3	SAMD8	SLC9A9
CPNE8	ANKRD1	SCFD2
LINC02354	HECTD2	AC021180.1
GRASP	EXOC6	C4orf22
LINC01619	WBP1L	LPCAT1
CRADD	CASP7	AC137810.1
LINC02452	PWWP2B	SPEF2
ALDH1L2	AL451069.2	RFESD
C12orf45	PNPLA2	SMIM3
AC007637.1	STIM1	AC022217.3
ACACB	PARVA	DUSP1
EP400	TEAD1	ZDHHC20P1
AC127070.4	PDE3B	FKBP5
CHFR	SLC1A2	CCND3
LINC00426	C11orf74	AL157371.2
CLYBL	FAM168A	AC005165.1
AL355974.2	UVRAG	IKZF1
COL4A2	DDX10	AUTS2
AL161668.3	COLCA2	PTPRN2
NDRG2	COLCA1	DLGAP2
TPPP2	ZBTB16	NBN
NFKBIA	JHY	DECR1
TDRD9	HSPA8	ZFPM2
IGHV3-37	JAM3	TG
KLF13	NCAPD3	ST3GAL1
SRP14-AS1	ERC1	TLE1
CORO2B	PDE3A	AKNA
AC009269.2	LMNTD1	ASTN2
UACA	AC022367.1	MAP3K15
ADAMTS7P4	ITPR2	GPR173
ISG20	MRPS35	TSC22D3
NARFL	AC023050.1
CIITA	FGD4
AC007220.1	TMEM117
MPV17L	OSBPL8
AC140504.1	LINC01619
AC135050.5	CRADD
KAT8	AC145422.1
AC002519.2	LINC01072
AC087564.1	MIPEP
SMPD3	AL359736.1
AC009022.1	SPATA13
PDXDC2P	KATNAL1
GSE1	AL356750.1
AC092127.1	LINC00426
AC135782.2	WBP4
DPEP1	ELF1
ABR	RUBCNL
P2RX5	DLEU1
P2RX5-TAX1BP3	GUCY1B2
P2RX1	KIAA0391
AC129492.3	AL121594.1
PER1	NFKBIA
MED9	SAMD4A
KCNJ12	LINC02284
AC003101.3	SYNE2
RAB11FIP4	ESR2
GPATCH8	SIPA1L1
EFTUD2	RGS6
PHB	VRTN
AC091180.3	CLMN
AC091180.5	PPP2R5C
TMEM100	TDRD9
ANKFN1	KLF13
GALK1	SRP14-AS1
PRCD	CASC4
CYGB	ZNF280D
BAHCC1	AC090517.4
AC008109.1	ADAM10
LDLRAD4	TRIP4
AP005131.1	ZNF609
KIAA1328	CIB2
DYM	ADAMTS7P4
OR7A5	NTRK3
OR7C1	ISG20
PRX	WDR24
CEACAM4	Z92544.2
LILRA2	CLEC16A
RNF144A	AC007220.1
LINC00298	PDXDC1
LINC00299	ZKSCAN2
KIF3C	AC008741.2
BABAM2	AC135050.5
MAP4K3	KAT8
THNSL2	SNTB2
MIR4435-2HG	AC009022.1
LYPD6B	PDXDC2P
FMNL2	AC009145.2
TANC1	WWOX
TLK1	GSE1
NFE2L2	ZFPM1
AC019080.1	AC135782.2
SPAG16	AC005696.3
PID1	P2RX1
SP100	ZNF624
AC104667.1	AC098850.2
CFAP61	TOM1L2
CTNNBL1	RAB11FIP4
ZHX3	GGNBP2
ZMYND8	AC099811.2
ZNF831	RAB5C
FP565260.6	GPATCH8
CU639417.3	AC005920.4
AP001341.1	TOB1-AS1
ZNF70	NME1
CASTOR1	NME1-NME2
AC004997.1	ANKFN1
PIK3IP1	MSI2
SYN3	PRKCA
TIMP3	FBF1
ATP2B2	TBCD
LRRC3B	AC008109.1
MYL3	LDLRAD4
NISCH	GREB1L
STAB1	AC023421.2
LINC00971	SLC14A1
AC092691.1	MIR3188
GSK3B	JUND
SLC9A9	ERF
MED12L	AC006486.1
LINC00578	OPA3
ST6GAL1	SAE1
LPP	SEC1P
XXYLT1	YWHAQ
SPON2	AC092687.1
AC098829.1	KIF3C
SCFD2	MAP4K3
AC021180.1	SLC8A1
SHROOM3	SLC8A1-AS1
C4orf22	MTA3
PPIAP76	XPO1
SLC10A7	PCBP1-AS1
FBXW7	TMEM150A
LPCAT1	USP39
NSUN2	CD8B
MYO10	CYTOR
AC137810.1	AC133644.3
SPEF2	AFF3
AC025470.2	NPAS2
RFESD	IL1R1
HMHB1	NCK2
AC008696.2	BCL2L11
PDE6A	MIR4435-2HG
SMIM3	AC017002.6
AC022217.3	ANAPC1
DUSP1	LINC01120
MIR8089	MGAT5
BTNL9	LCT
ZDHHC20P1	LYPD6B
ANKS1A	RIF1
FKBP5	CYTIP
TBC1D22B	TANC1
CCND3	RBMS1
AL157371.2	AC007277.1
KCNQ5	MYO3B
PRKN	AC078883.4
AFDN	ITGA6
CYTH3	LNPK
AC005165.1	PPP1R1C
GHRHR	CASP8
IKZF1	CDK15
DDC	CD28
FIGNL1	AC007879.2
AUTS2	AC007879.3
GTF2IP4	MYOSLID
GTF2IRD2P1	AC009226.1
GTF2IRD2	SPAG16
CASTOR2	AC068051.1
AC211486.4	IRS1
GTF2IP1	TRIP12
AC002456.1	FBXO36
CDK14	GPR55
STAG3	AC097713.1
CPED1	COPS9
AC009365.1	LINC01706
AKR1B1	CST2
CALD1	RALGAPB
DPP6	ADA
PTPRN2	ADNP
DLGAP2	ADNP-AS1
BLK	CU639417.3
AC123777.1	MIR6724-1
PDGFRL	FP671120.1
CSGALNACT1	FP236383.1
AC011726.1	MIR6724-3
BNIP3L	TEKT4P2
PTK2B	LINC01692
PAG1	AP000146.1
NBN	AP000317.2
DECR1	TRAPPC10
STK3	PIK3IP1
BAALC	FAM83F
ZFPM2	GRAMD4
SNTB1	PPARG
AC104316.1	AC093496.1
TG	SATB1-AS1
ST3GAL1	TRIM71
SCRIB	DCLK3
CCDC171	LINC02033
LINGO2	TRANK1
TLE1	CTNNB1
LINC00484	FHIT
AL158071.3	ZBTB20
PTPN3	AC092691.1
HSDL2	GSK3B
AKNA	KALRN
ASTN2	AC022296.1
GSN-AS1	IL20RB
GSN	IL20RB-AS1
FPGS	SLC9A9
MIR6722	SKIL
AL355987.1	TNIK
LCN6	TBL1XR1
PRKX	MCF2L2
SHROOM2	SENP2
MAP3K15	AC133473.1
GPR173	BCL6
TSC22D3	MUC4
AMOT	UVSSA
PLS3-AS1	SCFD2
TTTY14	AC058822.1
	FIP1L1
	AC021180.1
	C4orf22
	MAPK10
	FAM13A
	AC097478.1
	GRID2
	BMPR1B
	CXXC4-AS1
	CXXC4
	CAMK2D
	USP53
	AC097474.1
	ELF2
	MND1
	GLRB
	C4orf46
	ETFDH
	GALNT7
	AC078881.1
	ENPP6
	MTNR1A
	AC018709.1
	FAT1
	LPCAT1
	AC137810.1
	SPEF2
	IL7R
	NIPBL
	PIK3R1
	RASA1
	CCNH
	ADGRV1
	RFESD
	AC009126.1
	ERAP2
	EFNA5
	CAMK4
	STARD4-AS1
	ZNF608
	LINC02240
	MEGF10
	FSTL4
	GNPDA1
	ARHGAP26
	NDST1
	SMIM3
	AC022217.3
	DUSP1
	AC106795.3
	GMDS
	SLC22A23
	AL022097.1
	FARS2
	BMP6
	CASC15
	RIPOR2
	HIST1H1D
	ZDHHC20P1
	PRRC2A
	SNORA38
	FKBP5
	DNAH8
	CCND3
	TRERF1
	AL157371.2
	SUPT3H
	RUNX2
	PRIM2
	FAM46A
	SESN1
	ARHGAP18
	AL035634.1
	SNX9
	AIRN
	IGF2R
	MIOS
	IGF2BP3
	AC005165.1
	AOAH
	BLVRA
	GCK
	IKZF1
	VKORC1L1
	AUTS2
	AC211486.3
	CCDC71L
	AC004917.1
	AC006387.1
	PRKAR2B
	CFTR
	ZNF800
	CNPY1
	AC009403.2
	UBE3C
	PTPRN2
	DLGAP2
	GSR
	SPIDR
	TOX
	TPD52
	NBN
	DECR1
	VPS13B
	ZFPM2
	MED30
	FBXO32
	CCDC26
	AC011257.1
	TG
	SLA
	ST3GAL1
	BNC2
	PIP5K1B
	TRPM3
	TLE1
	RMI1
	SEMA4D
	ROR2
	SUSD3
	WNK2
	PALM2-AKAP2
	PALM2
	AKNA
	TNFSF8
	ASTN2
	RABGAP1
	RALGPS1
	STXBP1
	AK8
	AL162417.1
	RALGDS
	P2RY8
	NLGN4X
	AC003684.1
	MAP3K15
	CASK
	GPR173
	XKRX
	TSC22D3
	GRIA3
	ZNF280C

## Sheet: 697_DE of NR3C1 bound genes
NR3C1 target genes: differential expression after dexamethasone treatment compared to DMSO
This table shows the genes that are bound by NR3C1 (based on ChIP-seq) and are up or donwregulated upon dexamethasone treatment
Downregulated
	gene name	baseMean	log2FoldChange	lfcSE	stat	pvalue	padj
ENSG00000250186-AC091180.3	AC091180.3	103.437	-0.662952	0.216293	-3.06506	0.00217624	0.0408601		significant
ENSG00000109971-HSPA8	HSPA8	764.944	-0.416006	0.136349	-3.05104	0.00228051	0.0424307
ENSG00000167085-PHB	PHB	105.463	-0.648983	0.215083	-3.01737	0.00254981	0.0457775
ENSG00000112576-CCND3	CCND3	221.109	-0.467766	0.15813	-2.95811	0.00309536	0.0528163		not significant
ENSG00000257950-P2RX5-TAX1BP3	P2RX5-TAX1BP3	119.984	-0.559407	0.207551	-2.69528	0.00703295	0.0963542
ENSG00000132436-FIGNL1	FIGNL1	31.5348	-0.7142	0.358322	-1.99318	0.0462419	0.314509
ENSG00000108883-EFTUD2	EFTUD2	55.9368	-0.418538	0.281422	-1.48722	0.136956	0.534423
ENSG00000157087-ATP2B2	ATP2B2	26.179	-0.538998	0.393122	-1.37107	0.170353	0.57992
ENSG00000132792-CTNNBL1	CTNNBL1	45.1148	-0.435402	0.326921	-1.33183	0.182917	0.602059
ENSG00000144893-MED12L	MED12L	27.5662	-0.436879	0.38671	-1.12974	0.258588	0.698336
ENSG00000150477-KIAA1328	KIAA1328	8.51674	-0.719317	0.660047	-1.0898	0.275803	0.714993
ENSG00000151131-C12orf45	C12orf45	37.8003	-0.322509	0.331685	-0.972336	0.330884	0.76306
ENSG00000185811-IKZF1	IKZF1	72.521	-0.181661	0.243074	-0.747349	0.454853	0.848434
ENSG00000104375-STK3	STK3	25.9036	-0.292864	0.399156	-0.733708	0.463127	0.851554
ENSG00000103510-KAT8	KAT8	16.1378	-0.251591	0.498123	-0.505078	0.613504	0.917471
ENSG00000173950-XXYLT1	XXYLT1	25.337	-0.188561	0.392642	-0.480236	0.63106	0.924738
ENSG00000185760-KCNQ5	KCNQ5	20.6983	-0.197471	0.43613	-0.452781	0.650706	0.92666
ENSG00000148719-DNAJB12	DNAJB12	17.9987	-0.188097	0.460137	-0.408785	0.682697	0.936975
ENSG00000134871-COL4A2	COL4A2	17.8782	-0.179521	0.451718	-0.397417	0.69106	0.938635
ENSG00000164989-CCDC171	CCDC171	11.5195	-0.229038	0.591321	-0.387333	0.69851	0.939242
ENSG00000057608-GDI2	GDI2	226.903	-0.0580985	0.160198	-0.362667	0.716854	0.943471
ENSG00000196182-STK40	STK40	14.3496	-0.174489	0.51763	-0.337092	0.736047	0.948071
ENSG00000104320-NBN	NBN	60.788	-0.0865028	0.277279	-0.31197	0.755063	0.953818
ENSG00000108479-GALK1	GALK1	18.1007	-0.0687574	0.447234	-0.153739	0.877816	0.979476
ENSG00000180900-SCRIB	SCRIB	45.5319	-0.0409365	0.296997	-0.137835	0.890371	0.98128
ENSG00000151692-RNF144A	RNF144A	8.91687	-0.0176914	0.640849	-0.0276061	0.977976	0.996376
ENSG00000187792-ZNF70	ZNF70	11.574	-0.00699479	0.562062	-0.0124449	0.990071	0.998122
ENSG00000229694-LINC00484	LINC00484	0.925904	-2.21158	2.15088	-1.02822	0.303845	NA
ENSG00000100234-TIMP3	TIMP3	0.296112	-1.76504	3.72576	-0.47374	0.635685	NA
ENSG00000148219-ASTN2	ASTN2	1.22145	-1.41018	1.79459	-0.785792	0.431989	NA
ENSG00000231705-AL451069.2	AL451069.2	0.591658	-1.01231	2.57503	-0.393126	0.694226	NA
ENSG00000132437-DDC	DDC	0.122864	-0.928292	4.08047	-0.227496	0.820038	NA
ENSG00000137831-UACA	UACA	0.148056	-0.928292	4.08047	-0.227496	0.820038	NA
ENSG00000156395-SORCS3	SORCS3	0.122864	-0.928292	4.08047	-0.227496	0.820038	NA
ENSG00000253736-AC022217.3	AC022217.3	0.122864	-0.928292	4.08047	-0.227496	0.820038	NA
ENSG00000184194-GPR173	GPR173	0.95053	-0.845627	2.03564	-0.415411	0.677841	NA
ENSG00000172164-SNTB1	SNTB1	7.42781	-0.720832	0.710519	-1.01451	0.310337	NA
ENSG00000070159-PTPN3	PTPN3	1.2553	-0.611633	1.65127	-0.370402	0.711083	NA
ENSG00000185345-PRKN	PRKN	1.22022	-0.580665	1.74508	-0.332743	0.739328	NA
ENSG00000136010-ALDH1L2	ALDH1L2	1.40712	-0.549171	1.77316	-0.309713	0.756779	NA
ENSG00000106034-CPED1	CPED1	1.90523	-0.382878	1.41407	-0.270763	0.786573	NA
ENSG00000175449-RFESD	RFESD	1.89983	-0.352982	1.34854	-0.261751	0.793514	NA
ENSG00000153395-LPCAT1	LPCAT1	4.10893	-0.29304	0.936657	-0.312858	0.754389	NA
ENSG00000143772-ITPKB	ITPKB	5.15373	-0.198638	0.860794	-0.230761	0.817501	NA
ENSG00000180815-MAP3K15	MAP3K15	6.8401	-0.140305	0.725323	-0.193438	0.846616	NA
ENSG00000182704-TSKU	TSKU	7.64488	-0.136567	0.695814	-0.19627	0.844399	NA
ENSG00000120519-SLC10A7	SLC10A7	6.17224	-0.0023131	0.772821	-0.00299306	0.997612	NA
upregulated
ENSG00000109670-FBXW7	FBXW7	1314.33	1.95516	0.114114	17.1334	8.37e-66	6.88e-62		significant
ENSG00000096060-FKBP5	FKBP5	281.548	2.53318	0.170425	14.8639	5.65e-50	9.69e-47
ENSG00000165810-BTNL9	BTNL9	66.9968	2.64103	0.311325	8.48321	2.19e-17	8.05e-15
ENSG00000161835-GRASP	GRASP	37.3309	4.13567	0.495755	8.34216	7.29e-17	2.5e-14
ENSG00000157514-TSC22D3	TSC22D3	40.4754	6.02079	0.78408	7.6788	1.61e-14	4.59e-12
ENSG00000076641-PAG1	PAG1	41.0575	2.70788	0.366056	7.39745	1.39e-13	3.49e-11
ENSG00000148180-GSN	GSN	32.2058	5.30966	0.7181	7.39403	1.42e-13	3.49e-11
ENSG00000066923-STAG3	STAG3	27.4776	3.65825	0.52377	6.98446	2.86e-12	5.77e-10
ENSG00000010327-STAB1	STAB1	63.3716	1.95538	0.280907	6.96096	3.38e-12	6.44e-10
ENSG00000172183-ISG20	ISG20	21.4981	4.21986	0.663934	6.35585	2.07e-10	3.33e-08
ENSG00000106948-AKNA	AKNA	53.6325	1.78574	0.297097	6.01064	1.85e-09	2.38e-07
ENSG00000008256-CYTH3	CYTH3	32.3416	2.28605	0.397736	5.74766	9.05e-09	9.6e-07
ENSG00000100100-PIK3IP1	PIK3IP1	18.617	5.27882	0.927579	5.69096	1.26e-08	1.33e-06
ENSG00000084070-SMAP2	SMAP2	37.829	1.95832	0.352803	5.55075	2.84e-08	2.81e-06
ENSG00000108219-TSPAN14	TSPAN14	97.6827	1.23783	0.223611	5.53564	3.1e-08	3.04e-06
ENSG00000179583-CIITA	CIITA	104.636	1.19583	0.216419	5.52551	3.29e-08	3.19e-06
ENSG00000100906-NFKBIA	NFKBIA	115.873	1.1872	0.217395	5.46103	4.73e-08	4.51e-06
ENSG00000168675-LDLRAD4	LDLRAD4	69.2648	1.43172	0.262242	5.45952	4.77e-08	4.51e-06
ENSG00000256235-SMIM3	SMIM3	10.2939	6.85792	1.29388	5.30028	1.16e-07	9.83e-06
ENSG00000015413-DPEP1	DPEP1	15.568	5.61907	1.09607	5.12655	2.95e-07	2.17e-05
ENSG00000126016-AMOT	AMOT	168.963	0.891795	0.176001	5.06698	4.04e-07	2.89e-05
ENSG00000083454-P2RX5	P2RX5	54.2118	1.35832	0.287072	4.73165	2.23e-06	0.000135583
ENSG00000105227-PRX	PRX	11.3972	6.02235	1.28001	4.70491	2.54e-06	0.000151932
ENSG00000127530-OR7C1	OR7C1	11.5828	5.12133	1.12362	4.5579	5.17e-06	0.000293708
ENSG00000085662-AKR1B1	AKR1B1	253.735	0.690363	0.154724	4.4619	8.12e-06	0.000428628
ENSG00000104213-PDGFRL	PDGFRL	10.5022	3.37892	0.790786	4.27287	1.93e-05	0.0008864
ENSG00000179796-LRRC3B	LRRC3B	14.2468	2.73026	0.653502	4.17789	2.94e-05	0.00128273
ENSG00000204003-AL355987.1	AL355987.1	23.7972	1.79007	0.443384	4.03729	5.41e-05	0.00209941
ENSG00000010322-NISCH	NISCH	46.645	1.24745	0.318048	3.92222	8.77e-05	0.00321258
ENSG00000135821-GLUL	GLUL	87.9179	0.830956	0.221895	3.74481	0.000180527	0.00557528
ENSG00000072609-CHFR	CHFR	26.2691	1.52041	0.417246	3.64391	0.000268529	0.00769608
ENSG00000101040-ZMYND8	ZMYND8	218.788	0.673589	0.1876	3.59056	0.000329969	0.0091758
ENSG00000120899-PTK2B	PTK2B	107.829	0.766469	0.21603	3.54798	0.000388201	0.0105947
ENSG00000104325-DECR1	DECR1	78.6221	0.764065	0.232847	3.28141	0.00103291	0.0233062
ENSG00000169372-CRADD	CRADD	15.1046	1.80871	0.55622	3.25179	0.00114682	0.0253756
ENSG00000174306-ZHX3	ZHX3	23.0955	1.30659	0.424213	3.08004	0.00206972	0.0395823
ENSG00000136573-BLK	BLK	24.7239	1.28944	0.426058	3.02644	0.00247453	0.0449831
ENSG00000162946-DISC1	DISC1	15.9955	1.69749	0.56155	3.02287	0.00250391	0.0451978
ENSG00000267136-AP005131.1	AP005131.1	11.3643	1.87688	0.645735	2.90659	0.00365397	0.0599612		not significant
ENSG00000130396-AFDN	AFDN	99.7908	0.637599	0.220939	2.88585	0.00390353	0.0631196
ENSG00000067066-SP100	SP100	65.1798	0.747746	0.261405	2.86049	0.00422982	0.0672653
ENSG00000047056-WDR37	WDR37	8.88034	1.89805	0.695682	2.72832	0.00636571	0.0901301
ENSG00000158321-AUTS2	AUTS2	282.698	0.395732	0.14641	2.70291	0.00687356	0.094929
ENSG00000122786-CALD1	CALD1	373.912	0.37355	0.152882	2.44339	0.0145501	0.160456
ENSG00000169926-KLF13	KLF13	21.9653	1.04678	0.435956	2.40112	0.0163449	0.173583
ENSG00000267206-LCN6	LCN6	12.4522	1.35027	0.578506	2.33406	0.0195925	0.193463
ENSG00000159842-ABR	ABR	18.3232	1.14811	0.492643	2.3305	0.0197796	0.194626
ENSG00000183049-CAMK1D	CAMK1D	73.0932	0.640922	0.277118	2.31281	0.0207329	0.19907
ENSG00000172965-MIR4435-2HG	MIR4435-2HG	12.2631	1.26799	0.572458	2.21498	0.0267611	0.234587
ENSG00000145012-LPP	LPP	41.6751	0.631893	0.31022	2.03692	0.0416581	0.297034
ENSG00000138771-SHROOM3	SHROOM3	39.9479	0.701002	0.349616	2.00506	0.0449565	0.310441
ENSG00000125246-CLYBL	CLYBL	18.0494	0.963007	0.486188	1.98073	0.0476215	0.318788
ENSG00000131149-GSE1	GSE1	41.4475	0.596394	0.323925	1.84115	0.0656002	0.382805
ENSG00000196275-GTF2IRD2	GTF2IRD2	29.1476	0.666028	0.363596	1.83178	0.0669844	0.386207
ENSG00000120129-DUSP1	DUSP1	19.0446	0.837539	0.457713	1.82983	0.067275	0.387198
ENSG00000065491-TBC1D22B	TBC1D22B	9.86965	1.1327	0.633948	1.78674	0.073979	0.406585
ENSG00000258471-AL161668.3	AL161668.3	35.379	0.667901	0.383569	1.74128	0.0816347	0.42316
ENSG00000145555-MYO10	MYO10	48.5142	0.484472	0.284268	1.70428	0.0883286	0.43651
ENSG00000183943-PRKX	PRKX	43.708	0.532506	0.317753	1.67585	0.0937674	0.450727
ENSG00000266074-BAHCC1	BAHCC1	61.0976	0.450601	0.271794	1.65788	0.0973417	0.458288
ENSG00000148468-FAM171A1	FAM171A1	53.9494	0.439215	0.276324	1.58949	0.111949	0.489939
ENSG00000162337-LRP5	LRP5	11.0331	0.996608	0.629771	1.58249	0.113537	0.493738
ENSG00000082701-GSK3B	GSK3B	23.9925	0.627418	0.412208	1.52209	0.127986	0.521526
ENSG00000179094-PER1	PER1	16.1087	0.764402	0.510292	1.49797	0.134141	0.530632
ENSG00000115183-TANC1	TANC1	11.4816	0.866476	0.581084	1.49114	0.135926	0.532244
ENSG00000158497-HMHB1	HMHB1	18.3915	0.675121	0.46577	1.44947	0.147206	0.547975
ENSG00000165795-NDRG2	NDRG2	9.28523	0.948842	0.687201	1.38073	0.167361	0.577471
ENSG00000238121-LINC00426	LINC00426	11.7249	0.736201	0.562404	1.30902	0.190526	0.61163
ENSG00000143624-INTS3	INTS3	13.8189	0.628053	0.5397	1.16371	0.244542	0.683536
ENSG00000277053-GTF2IP1	GTF2IP1	91.7519	0.244266	0.221195	1.1043	0.269461	0.707267
ENSG00000037474-NSUN2	NSUN2	59.2496	0.323252	0.303717	1.06432	0.287183	0.727274
ENSG00000048649-RSF1	RSF1	162.402	0.18551	0.182979	1.01383	0.310662	0.747385
ENSG00000150760-DOCK1	DOCK1	18.4142	0.446972	0.451053	0.990954	0.321708	0.756211
ENSG00000058091-CDK14	CDK14	41.9068	0.298028	0.30753	0.9691	0.332495	0.76379
ENSG00000157933-SKI	SKI	21.5235	0.399454	0.429143	0.93082	0.351947	0.781591
ENSG00000054965-FAM168A	FAM168A	10.1888	0.582941	0.630978	0.92387	0.355554	0.784003
ENSG00000141627-DYM	DYM	16.7598	0.446586	0.48815	0.914854	0.360268	0.786505
ENSG00000011566-MAP4K3	MAP4K3	15.2965	0.459467	0.505579	0.908794	0.363459	0.788599
ENSG00000198586-TLK1	TLK1	86.6728	0.184761	0.2251	0.820796	0.411762	0.824888
ENSG00000186566-GPATCH8	GPATCH8	97.553	0.177815	0.218601	0.813423	0.415975	0.828809
ENSG00000158019-BABAM2	BABAM2	21.7795	0.360901	0.453266	0.796222	0.425903	0.835007
ENSG00000064999-ANKS1A	ANKS1A	12.6805	0.426775	0.550254	0.775598	0.437987	0.842011
ENSG00000131697-NPHP4	NPHP4	9.52052	0.476589	0.616378	0.773209	0.439399	0.842097
ENSG00000008513-ST3GAL1	ST3GAL1	12.929	0.396327	0.536077	0.73931	0.459719	0.850263
ENSG00000196781-TLE1	TLE1	37.6987	0.219479	0.320533	0.684731	0.493514	0.86512
ENSG00000136877-FPGS	FPGS	94.5409	0.129922	0.224134	0.579662	0.562142	0.896991
ENSG00000116044-NFE2L2	NFE2L2	52.1145	0.158322	0.30616	0.517123	0.605071	0.914237
ENSG00000240038-AMY2B	AMY2B	19.4859	0.229122	0.4513	0.507693	0.611669	0.917147
ENSG00000131242-RAB11FIP4	RAB11FIP4	11.4294	0.202547	0.570829	0.354829	0.722718	0.94425
ENSG00000141026-MED9	MED9	17.0903	0.140634	0.465204	0.302306	0.762419	0.956433
ENSG00000073849-ST6GAL1	ST6GAL1	12.4032	0.124574	0.547087	0.227704	0.819876	0.967051
ENSG00000233369-GTF2IP4	GTF2IP4	90.8625	0.0467162	0.232984	0.200512	0.84108	0.972903
ENSG00000119471-HSDL2	HSDL2	20.1087	0.0847353	0.438713	0.193145	0.846845	0.974085
ENSG00000183495-EP400	EP400	92.6656	0.0413122	0.222068	0.186034	0.852418	0.975484
ENSG00000104765-BNIP3L	BNIP3L	18.2458	0.0847882	0.478621	0.177151	0.85939	0.976182
ENSG00000157827-FMNL2	FMNL2	101.628	0.0264953	0.213255	0.124242	0.901123	0.985507
ENSG00000255185-PDXDC2P	PDXDC2P	9.2595	0.0793834	0.63887	0.124256	0.901113	0.985507
ENSG00000184178-SCFD2	SCFD2	27.1765	0.0295771	0.377036	0.0784465	0.937473	0.993067
ENSG00000184185-KCNJ12	KCNJ12	16.4085	0.0313592	0.476763	0.0657752	0.947557	0.993328
ENSG00000237422-AL158071.3	AL158071.3	0.547592	0.00187703	2.60242	0.000721263	0.999425	NA
ENSG00000167323-STIM1	STIM1	2.64388	0.0302015	1.16338	0.0259602	0.979289	NA
ENSG00000263620-AC129492.3	AC129492.3	0.286392	0.0334918	3.51493	0.00952843	0.992398	NA
ENSG00000285367-AC087564.1	AC087564.1	0.358134	0.0334932	3.24785	0.0103124	0.991772	NA
ENSG00000223969-AC002456.1	AC002456.1	0.37186	0.0334934	3.21636	0.0104135	0.991691	NA
ENSG00000280433-FP565260.6	FP565260.6	7.22458	0.176267	0.737585	0.238978	0.811123	NA
ENSG00000152779-SLC16A12	SLC16A12	1.09728	0.462029	3.90047	0.118455	0.905707	NA
ENSG00000103056-SMPD3	SMPD3	5.21886	0.472998	0.847125	0.558356	0.576601	NA
ENSG00000108405-P2RX1	P2RX1	6.53301	0.576318	0.822128	0.701008	0.483298	NA
ENSG00000176728-TTTY14	TTTY14	3.69549	0.624613	0.995129	0.62767	0.53022	NA
ENSG00000245008-AP001122.1	AP001122.1	2.13118	0.647168	1.31643	0.491608	0.622997	NA
ENSG00000132915-PDE6A	PDE6A	1.91035	0.656198	1.43944	0.45587	0.648483	NA
ENSG00000139117-CPNE8	CPNE8	5.63853	0.716147	0.827399	0.865539	0.386743	NA
ENSG00000270106-TSNAX-DISC1	TSNAX-DISC1	7.52278	0.724605	0.788309	0.919189	0.357997	NA
ENSG00000076555-ACACB	ACACB	0.776053	0.736845	2.08152	0.353993	0.723344	NA
ENSG00000155093-PTPRN2	PTPRN2	2.49683	0.848671	1.29093	0.657411	0.510917	NA
ENSG00000156968-MPV17L	MPV17L	5.1219	0.85614	0.920808	0.92977	0.35249	NA
ENSG00000186094-AGBL4	AGBL4	1.35118	0.857279	1.66683	0.514317	0.60703	NA
ENSG00000248508-SRP14-AS1	SRP14-AS1	3.25578	0.920268	1.09077	0.843685	0.398845	NA
ENSG00000144115-THNSL2	THNSL2	0.210078	0.995261	4.08047	0.243908	0.807302	NA
ENSG00000250961-AC025470.2	AC025470.2	0.156719	0.995261	4.08047	0.243908	0.807302	NA
ENSG00000262039-AC091180.5	AC091180.5	0.156719	0.995261	4.08047	0.243908	0.807302	NA
ENSG00000105352-CEACAM4	CEACAM4	0.138336	0.995261	4.08047	0.243908	0.807302	NA
ENSG00000233916-ZDHHC20P1	ZDHHC20P1	0.138336	0.995261	4.08047	0.243908	0.807302	NA
ENSG00000235641-LINC00484	LINC00484	0.138336	0.995261	4.08047	0.243908	0.807302	NA
ENSG00000239998-LILRA2	LILRA2	0.600321	1.02343	2.57144	0.397998	0.690631	NA
ENSG00000147408-CSGALNACT1	CSGALNACT1	0.489661	1.0295	2.72158	0.378274	0.705227	NA
ENSG00000084731-KIF3C	KIF3C	4.68256	1.11746	1.01399	1.10203	0.270447	NA
ENSG00000213963-AC019080.1	AC019080.1	2.02441	1.1333	1.35562	0.836	0.403155	NA
ENSG00000198010-DLGAP2	DLGAP2	0.65368	1.17363	2.65292	0.442389	0.658207	NA
ENSG00000214544-GTF2IRD2P1	GTF2IRD2P1	3.64537	1.28601	1.13532	1.13273	0.257328	NA
ENSG00000278949-AC127070.4	AC127070.4	0.992557	1.42303	2.06737	0.688328	0.491246	NA
ENSG00000124203-ZNF831	ZNF831	1.51719	1.45205	1.64719	0.881531	0.37803	NA
ENSG00000263033-AC007220.1	AC007220.1	0.276672	1.70292	3.82798	0.444861	0.65642	NA
ENSG00000235865-GSN-AS1	GSN-AS1	1.55835	1.86302	1.66389	1.11968	0.262849	NA
ENSG00000164929-BAALC	BAALC	3.46023	1.9558	1.12842	1.73322	0.0830565	NA
ENSG00000160808-MYL3	MYL3	0.366797	2.00416	3.17138	0.631952	0.527418	NA
ENSG00000150556-LYPD6B	LYPD6B	4.71892	2.07599	0.977552	2.12367	0.0336982	NA
ENSG00000161544-CYGB	CYGB	0.913267	2.16374	2.19983	0.983591	0.325316	NA
ENSG00000275830-AL355974.2	AL355974.2	0.420156	2.17157	3.26303	0.665506	0.505727	NA
ENSG00000133019-CHRM3	CHRM3	0.433391	2.31578	2.94604	0.786064	0.43183	NA
ENSG00000124942-AHNAK	AHNAK	0.48675	2.4444	2.83112	0.863405	0.387915	NA
ENSG00000143858-SYT2	SYT2	1.88623	2.44444	1.63272	1.49715	0.134353	NA
ENSG00000103647-CORO2B	CORO2B	6.60199	2.51664	0.879761	2.8606	0.00422841	NA
ENSG00000239282-CASTOR1	CASTOR1	2.9877	2.52376	1.3042	1.93511	0.0529772	NA
ENSG00000183780-SLC35F3	SLC35F3	1.22492	2.6518	1.89793	1.39721	0.162352	NA
ENSG00000130226-DPP6	DPP6	0.625086	2.81626	2.58665	1.08877	0.276257	NA
ENSG00000109906-ZBTB16	ZBTB16	1.43499	2.89106	1.80452	1.60212	0.10913	NA
ENSG00000042832-TG	TG	0.728446	3.06185	2.42224	1.26406	0.206209	NA
ENSG00000172260-NEGR1	NEGR1	1.74892	3.10998	1.71822	1.81001	0.0702946	NA
ENSG00000162849-KIF26B	KIF26B	0.765211	3.12027	2.41739	1.29076	0.196786	NA
ENSG00000248751-AC004997.1	AC004997.1	2.10148	3.5293	1.66826	2.11555	0.0343827	NA
ENSG00000271826-PLS3-AS1	PLS3-AS1	4.13737	3.54857	1.30239	2.72465	0.00643693	NA
ENSG00000214140-PRCD	PRCD	1.28873	3.85746	1.96132	1.96677	0.0492101	NA
ENSG00000242641-LINC00971	LINC00971	1.30711	3.87142	3.74795	1.03294	0.30163	NA
ENSG00000181804-SLC9A9	SLC9A9	1.4654	4.02719	3.46041	1.16379	0.244509	NA
ENSG00000159674-SPON2	SPON2	6.55453	4.27917	1.20617	3.54775	0.000388543	NA
ENSG00000218052-ADAMTS7P4	ADAMTS7P4	1.79722	4.29967	1.74925	2.45801	0.0139708	NA
ENSG00000249881-AC008696.2	AC008696.2	1.77548	4.31781	1.7403	2.48108	0.0130986	NA
ENSG00000257242-LINC01619	LINC01619	3.8309	4.38412	1.45878	3.00534	0.00265284	NA
ENSG00000166292-TMEM100	TMEM100	2.75412	4.9289	1.56313	3.15321	0.00161483	NA
ENSG00000156414-TDRD9	TDRD9	2.9057	5.02721	1.53488	3.27531	0.00105547	NA
ENSG00000188269-OR7A5	OR7A5	3.79937	5.39132	1.47011	3.6673	0.000245122	NA
ENSG00000107551-RASSF4	RASSF4	5.83134	6.02037	1.38061	4.36065	1.3e-05	NA
ENSG00000060138-YBX3	YBX3	0	NA	NA	NA	NA	NA
ENSG00000089101-CFAP61	CFAP61	0	NA	NA	NA	NA	NA
ENSG00000106128-GHRHR	GHRHR	0	NA	NA	NA	NA	NA
ENSG00000144451-SPAG16	SPAG16	0	NA	NA	NA	NA	NA
ENSG00000146950-SHROOM2	SHROOM2	0	NA	NA	NA	NA	NA
ENSG00000152582-SPEF2	SPEF2	0	NA	NA	NA	NA	NA
ENSG00000153823-PID1	PID1	0	NA	NA	NA	NA	NA
ENSG00000153930-ANKFN1	ANKFN1	0	NA	NA	NA	NA	NA
ENSG00000169946-ZFPM2	ZFPM2	0	NA	NA	NA	NA	NA
ENSG00000174482-LINGO2	LINGO2	0	NA	NA	NA	NA	NA
ENSG00000179636-TPPP2	TPPP2	0	NA	NA	NA	NA	NA
ENSG00000185666-SYN3	SYN3	0	NA	NA	NA	NA	NA
ENSG00000186205-36951	36951	0	NA	NA	NA	NA	NA
ENSG00000204740-MALRD1	MALRD1	0	NA	NA	NA	NA	NA
ENSG00000222042-AP001341.1	AP001341.1	0	NA	NA	NA	NA	NA
ENSG00000223561-AC005165.1	AC005165.1	0	NA	NA	NA	NA	NA
ENSG00000225881-AC009365.1	AC009365.1	0	NA	NA	NA	NA	NA
ENSG00000226476-LINC01748	LINC01748	0	NA	NA	NA	NA	NA
ENSG00000227107-AC104667.1	AC104667.1	0	NA	NA	NA	NA	NA
ENSG00000227160-THEM7P	THEM7P	0	NA	NA	NA	NA	NA
ENSG00000228221-LINC00578	LINC00578	0	NA	NA	NA	NA	NA
ENSG00000229785-SLC25A38P1	SLC25A38P1	0	NA	NA	NA	NA	NA
ENSG00000234190-AC241644.2	AC241644.2	0	NA	NA	NA	NA	NA
ENSG00000235665-LINC00298	LINC00298	0	NA	NA	NA	NA	NA
ENSG00000236790-LINC00299	LINC00299	0	NA	NA	NA	NA	NA
ENSG00000238042-LINC02257	LINC02257	0	NA	NA	NA	NA	NA
ENSG00000239268-AC092691.1	AC092691.1	0	NA	NA	NA	NA	NA
ENSG00000241183-AC009022.1	AC009022.1	0	NA	NA	NA	NA	NA
ENSG00000248969-AC137810.1	AC137810.1	0	NA	NA	NA	NA	NA
ENSG00000249252-AC098829.1	AC098829.1	0	NA	NA	NA	NA	NA
ENSG00000250484-PPIAP76	PPIAP76	0	NA	NA	NA	NA	NA
ENSG00000250532-AC021180.1	AC021180.1	0	NA	NA	NA	NA	NA
ENSG00000251203-AC011726.1	AC011726.1	0	NA	NA	NA	NA	NA
ENSG00000253359-IGHV3-37	IGHV3-37	0	NA	NA	NA	NA	NA
ENSG00000253607-AC104316.1	AC104316.1	0	NA	NA	NA	NA	NA
ENSG00000254813-AC123777.1	AC123777.1	0	NA	NA	NA	NA	NA
ENSG00000255117-LINC02546	LINC02546	0	NA	NA	NA	NA	NA
ENSG00000256139-AC007637.1	AC007637.1	0	NA	NA	NA	NA	NA
ENSG00000257488-LINC02354	LINC02354	0	NA	NA	NA	NA	NA
ENSG00000259532-AC009269.2	AC009269.2	0	NA	NA	NA	NA	NA
ENSG00000259989-AC135782.2	AC135782.2	0	NA	NA	NA	NA	NA
ENSG00000260417-AC092127.1	AC092127.1	0	NA	NA	NA	NA	NA
ENSG00000261130-AC140504.1	AC140504.1	0	NA	NA	NA	NA	NA
ENSG00000261457-AC002519.2	AC002519.2	0	NA	NA	NA	NA	NA
ENSG00000262766-AC135050.5	AC135050.5	0	NA	NA	NA	NA	NA
ENSG00000266602-AC008109.1	AC008109.1	0	NA	NA	NA	NA	NA
ENSG00000274070-CASTOR2	CASTOR2	0	NA	NA	NA	NA	NA
ENSG00000275121-AC211486.4	AC211486.4	0	NA	NA	NA	NA	NA
ENSG00000277912-MIR8089	MIR8089	0	NA	NA	NA	NA	NA
ENSG00000278756-MIR6722	MIR6722	0	NA	NA	NA	NA	NA
ENSG00000278977-AC003101.3	AC003101.3	0	NA	NA	NA	NA	NA
ENSG00000280013-CU639417.3	CU639417.3	0	NA	NA	NA	NA	NA
ENSG00000283422-LINC02452	LINC02452	0	NA	NA	NA	NA	NA
ENSG00000283573-AL157371.2	AL157371.2	0	NA	NA	NA	NA	NA
ENSG00000284653-AL357509.1	AL357509.1	0	NA	NA	NA	NA	NA

## Sheet: SUPT1_DE of NR3C1 bound genes
NR3C1 target genes: differential expression after dexamethasone treatment compared to DMSO
This table shows the genes that are bound by NR3C1 (based on ChIP-seq) and are up or donwregulated upon dexamethasone treatment
Downregulated
	gene name	baseMean	log2FoldChange	lfcSE	stat	pvalue	padj
ENSG00000109971-HSPA8	HSPA8	844.933	-0.636343	0.0861067	-7.39017	1.47e-13	1.87e-11		significant
ENSG00000080345-RIF1	RIF1	389.444	-0.762192	0.112962	-6.74731	1.51e-11	1.29e-09
ENSG00000121211-MND1	MND1	86.4416	-0.867988	0.22118	-3.92436	8.7e-05	0.0015866
ENSG00000239672-NME1	NME1	190.71	-0.529169	0.159426	-3.31921	0.000902732	0.0109036
ENSG00000142230-SAE1	SAE1	193.202	-0.482244	0.152676	-3.15862	0.0015852	0.0170722
ENSG00000134308-YWHAQ	YWHAQ	469.261	-0.311815	0.105795	-2.94735	0.00320512	0.0302206
ENSG00000178966-RMI1	RMI1	26.4135	-0.87681	0.382724	-2.29098	0.0219649	0.128819		not significant
ENSG00000076554-TPD52	TPD52	47.6818	-0.649706	0.295238	-2.20062	0.027763	0.151466
ENSG00000144320-LNPK	LNPK	45.7168	-0.619895	0.286938	-2.16038	0.0307432	0.161894
ENSG00000178105-DDX10	DDX10	101.673	-0.458219	0.214189	-2.13932	0.0324099	0.167949
ENSG00000082898-XPO1	XPO1	105.677	-0.427999	0.205164	-2.08613	0.0369665	0.182291
ENSG00000112576-CCND3	CCND3	454.042	-0.200808	0.106937	-1.87782	0.0604057	0.250753
ENSG00000009335-UBE3C	UBE3C	85.9217	-0.409436	0.218726	-1.87191	0.0612186	0.252217
ENSG00000168883-USP39	USP39	86.0798	-0.406536	0.228026	-1.78285	0.0746112	0.282975
ENSG00000151503-NCAPD3	NCAPD3	59.5829	-0.452724	0.259302	-1.74593	0.0808224	0.297649
ENSG00000011052-NME1-NME2	NME1-NME2	567.844	-0.179186	0.102843	-1.74232	0.081453	0.298703
ENSG00000091039-OSBPL8	OSBPL8	113.601	-0.320286	0.189536	-1.68984	0.0910586	0.319794
ENSG00000146143-PRIM2	PRIM2	21.6905	-0.719158	0.447224	-1.60805	0.107824	0.353185
ENSG00000205208-C4orf46	C4orf46	20.0939	-0.703371	0.439229	-1.60138	0.109294	0.35581
ENSG00000177565-TBL1XR1	TBL1XR1	60.4456	-0.378543	0.256707	-1.47461	0.140317	0.40863
ENSG00000165806-CASP7	CASP7	20.0795	-0.629649	0.432876	-1.45457	0.145788	0.418923
ENSG00000061794-MRPS35	MRPS35	70.5203	-0.375138	0.258168	-1.45307	0.146203	0.419151
ENSG00000153107-ANAPC1	ANAPC1	77.4349	-0.320144	0.223797	-1.43051	0.15257	0.429001
ENSG00000204469-PRRC2A	PRRC2A	31.4546	-0.447409	0.360267	-1.24188	0.21428	0.513734
ENSG00000258790-AL121594.1	AL121594.1	290.17	-0.143951	0.124338	-1.15775	0.246968	0.553654
ENSG00000196715-VKORC1L1	VKORC1L1	49.2458	-0.369498	0.322776	-1.14475	0.252313	0.560634
ENSG00000255185-PDXDC2P	PDXDC2P	19.6055	-0.508299	0.456968	-1.11233	0.265997	0.578033
ENSG00000186153-WWOX	WWOX	21.3324	-0.457645	0.423932	-1.07953	0.280354	0.59398
ENSG00000137266-SLC22A23	SLC22A23	25.2832	-0.438358	0.405824	-1.08017	0.280068	0.59398
ENSG00000164758-MED30	MED30	14.2881	-0.574217	0.538034	-1.06725	0.285859	0.599224
ENSG00000115183-TANC1	TANC1	18.4502	-0.523204	0.507504	-1.03094	0.302571	0.618229
ENSG00000143458-GABPB2	GABPB2	34.3	-0.343648	0.338587	-1.01495	0.31013	0.627634
ENSG00000054654-SYNE2	SYNE2	368.587	-0.114229	0.119062	-0.959409	0.337353	0.653078
ENSG00000104320-NBN	NBN	44.9094	-0.303975	0.317373	-0.957782	0.338173	0.653869
ENSG00000048405-ZNF800	ZNF800	47.3902	-0.275573	0.298565	-0.922992	0.356011	0.671707
ENSG00000100890-KIAA0391	KIAA0391	66.8311	-0.214764	0.243154	-0.883239	0.377107	0.68934
ENSG00000138190-EXOC6	EXOC6	28.5358	-0.250264	0.357468	-0.7001	0.483865	0.764346
ENSG00000148719-DNAJB12	DNAJB12	26.0624	-0.227488	0.377372	-0.602823	0.546627	0.803921
ENSG00000054965-FAM168A	FAM168A	20.0743	-0.241198	0.438136	-0.55051	0.58197	0.822804
ENSG00000196781-TLE1	TLE1	43.7647	-0.152848	0.293607	-0.520587	0.602654	0.835144
ENSG00000185420-SMYD3	SMYD3	41.1425	-0.149307	0.299818	-0.49799	0.618491	0.842182
ENSG00000105722-ERF	ERF	15.5839	-0.22483	0.518784	-0.433378	0.66474	0.86916
ENSG00000116473-RAP1A	RAP1A	43.886	-0.121059	0.292239	-0.414246	0.678694	0.876384
ENSG00000166086-JAM3	JAM3	26.8586	-0.14114	0.376344	-0.375028	0.70764	0.889865
ENSG00000148498-PARD3	PARD3	43.1803	-0.105431	0.29354	-0.35917	0.719468	0.894844
ENSG00000120688-WBP4	WBP4	57.5271	-0.0901118	0.254385	-0.354233	0.723164	0.896923
ENSG00000083857-FAT1	FAT1	35.2743	-0.0967413	0.352757	-0.274244	0.783897	0.921249
ENSG00000171503-ETFDH	ETFDH	56.0096	-0.0384914	0.259308	-0.148439	0.881996	0.957247
ENSG00000125741-OPA3	OPA3	21.0596	-0.0293856	0.421656	-0.0696909	0.94444	0.980507
ENSG00000234810-AL603840.1	AL603840.1	1.42163	-3.89663	1.84154	-2.11596	0.0343481	NA
ENSG00000071909-MYO3B	MYO3B	1.38198	-2.56479	1.84362	-1.39117	0.164173	NA
ENSG00000124575-HIST1H1D	HIST1H1D	7.6609	-2.32767	0.813843	-2.86009	0.00423518	NA
ENSG00000277379-MIR6724-3	MIR6724-3	0.46168	-2.28092	2.89296	-0.788436	0.430442	NA
ENSG00000231705-AL451069.2	AL451069.2	0.452815	-2.25843	2.91225	-0.775493	0.438048	NA
ENSG00000268643-AC006486.1	AC006486.1	0.314075	-1.72051	3.65738	-0.470422	0.638054	NA
ENSG00000160145-KALRN	KALRN	1.03503	-1.29263	1.9488	-0.663295	0.507142	NA
ENSG00000148677-ANKRD1	ANKRD1	2.97239	-1.056	1.13395	-0.931257	0.351721	NA
ENSG00000153395-LPCAT1	LPCAT1	13.0843	-1.0066	0.580746	-1.73329	0.0830447	NA
ENSG00000069702-TGFBR3	TGFBR3	3.00149	-0.963556	1.12855	-0.853801	0.393215	NA
ENSG00000282278-AC058822.1	AC058822.1	2.78892	-0.830037	1.19402	-0.695164	0.486952	NA
ENSG00000106633-GCK	GCK	0.165903	-0.822357	4.08047	-0.201535	0.84028	NA
ENSG00000237352-LINC01358	LINC01358	0.147889	-0.822357	4.08047	-0.201535	0.84028	NA
ENSG00000259719-LINC02284	LINC02284	0.157037	-0.822357	4.08047	-0.201535	0.84028	NA
ENSG00000134256-CD101	CD101	0.606224	-0.785134	2.58436	-0.303802	0.761279	NA
ENSG00000259456-ADNP-AS1	ADNP-AS1	1.02828	-0.756616	1.98903	-0.380394	0.703653	NA
ENSG00000186197-EDARADD	EDARADD	8.77399	-0.709744	0.67047	-1.05858	0.289793	NA
ENSG00000260971-AC119674.1	AC119674.1	1.62564	-0.650375	1.57259	-0.41357	0.679189	NA
ENSG00000182183-SHISAL2A	SHISAL2A	0.739256	-0.588604	2.19897	-0.267672	0.788952	NA
ENSG00000155093-PTPRN2	PTPRN2	1.32868	-0.587217	1.62035	-0.362402	0.717052	NA
ENSG00000153832-FBXO36	FBXO36	3.56359	-0.569879	1.03611	-0.550015	0.582309	NA
ENSG00000005249-PRKAR2B	PRKAR2B	8.63157	-0.555335	0.686235	-0.80925	0.418372	NA
ENSG00000145113-MUC4	MUC4	1.02285	-0.482444	1.93561	-0.249246	0.803171	NA
ENSG00000183023-SLC8A1	SLC8A1	1.60191	-0.461399	1.53975	-0.299658	0.764438	NA
ENSG00000184349-EFNA5	EFNA5	12.1676	-0.316914	0.559655	-0.566266	0.571213	NA
ENSG00000080546-SESN1	SESN1	3.60593	-0.228513	1.04869	-0.217903	0.827505	NA
ENSG00000267261-AC099811.2	AC099811.2	8.03519	-0.225412	0.676257	-0.333322	0.738891	NA
ENSG00000053524-MCF2L2	MCF2L2	4.97003	-0.155627	0.841916	-0.184848	0.853348	NA
ENSG00000273598-AC211486.3	AC211486.3	2.32963	-0.153535	1.21546	-0.126319	0.899479	NA
ENSG00000136854-STXBP1	STXBP1	9.5702	-0.151718	0.63121	-0.240361	0.810051	NA
ENSG00000056277-ZNF280C	ZNF280C	5.71905	-0.111992	0.782393	-0.143141	0.886179	NA
ENSG00000237399-PITRM1-AS1	PITRM1-AS1	2.07112	-0.111477	1.35871	-0.082046	0.93461	NA
ENSG00000284686-AC119674.2	AC119674.2	12.8214	-0.0995791	0.543657	-0.183165	0.854668	NA
ENSG00000145416-36951	36951	4.3398	-0.0791539	0.950638	-0.083264	0.933642	NA
ENSG00000136828-RALGPS1	RALGPS1	4.73914	-0.0746072	0.955205	-0.0781059	0.937744	NA
ENSG00000227028-SLC8A1-AS1	SLC8A1-AS1	1.6199	-0.0615049	1.56007	-0.0394244	0.968552	NA
ENSG00000240038-AMY2B	AMY2B	10.3146	-0.0593299	0.609736	-0.0973043	0.922485	NA
ENSG00000197566-ZNF624	ZNF624	4.28848	-0.0488682	0.994759	-0.0491257	0.960819	NA
ENSG00000020577-SAMD4A	SAMD4A	5.98294	-0.0179414	0.801299	-0.0223904	0.982137	NA
upregulated
ENSG00000168685-IL7R	IL7R	691.422	2.43222	0.103661	23.4633	9.68e-122	9.23e-118		significant
ENSG00000096060-FKBP5	FKBP5	1005.82	1.95088	0.0921804	21.1637	2.06e-99	9.84e-96
ENSG00000157514-TSC22D3	TSC22D3	241.788	7.58994	0.527585	14.3862	6.32e-47	1.21e-43
ENSG00000123836-PFKFB2	PFKFB2	63.9501	3.71582	0.344901	10.7736	4.59e-27	3.65e-24
ENSG00000084070-SMAP2	SMAP2	90.4989	2.08753	0.237503	8.78947	1.5e-18	3.58e-16
ENSG00000058453-CROCC	CROCC	36.3952	4.82033	0.586133	8.22395	1.97e-16	3.68e-14
ENSG00000091409-ITGA6	ITGA6	39.2189	3.30447	0.409518	8.06918	7.08e-16	1.21e-13
ENSG00000141556-TBCD	TBCD	503.713	0.883115	0.110295	8.00687	1.18e-15	1.87e-13
ENSG00000156804-FBXO32	FBXO32	31.9205	3.56314	0.470273	7.57676	3.54e-14	4.9e-12
ENSG00000172183-ISG20	ISG20	34.7969	5.76244	0.778164	7.40518	1.31e-13	1.69e-11
ENSG00000108405-P2RX1	P2RX1	28.1887	4.43867	0.60209	7.3721	1.68e-13	2.11e-11
ENSG00000182957-SPATA13	SPATA13	61.0013	1.93688	0.271078	7.14507	8.99e-13	9.87e-11
ENSG00000197081-IGF2R	IGF2R	204.662	1.04124	0.149335	6.97249	3.11e-12	3.03e-10
ENSG00000123104-ITPR2	ITPR2	364.029	0.726674	0.114476	6.34784	2.18e-10	1.52e-08
ENSG00000135821-GLUL	GLUL	104.62	1.22706	0.200817	6.11034	9.94e-10	6e-08
ENSG00000100906-NFKBIA	NFKBIA	106.129	1.21268	0.202881	5.97729	2.27e-09	1.3e-07
ENSG00000162434-JAK1	JAK1	206.375	0.998785	0.167788	5.95266	2.64e-09	1.48e-07
ENSG00000145390-USP53	USP53	31.0865	2.27161	0.389283	5.83536	5.37e-09	2.72e-07
ENSG00000169926-KLF13	KLF13	263.606	0.85624	0.15119	5.66334	1.48e-08	7.05e-07
ENSG00000145715-RASA1	RASA1	102.116	1.16265	0.207891	5.59258	2.24e-08	1.02e-06
ENSG00000153944-MSI2	MSI2	300.537	0.694667	0.128574	5.40288	6.56e-08	2.55e-06
ENSG00000166272-WBP1L	WBP1L	65.2927	1.29051	0.253264	5.0955	3.48e-07	1.19e-05
ENSG00000155926-SLA	SLA	140.727	0.842995	0.173765	4.85135	1.23e-06	3.66e-05
ENSG00000064012-CASP8	CASP8	119.628	0.90106	0.187151	4.81461	1.47e-06	4.3e-05
ENSG00000106948-AKNA	AKNA	76.1677	1.08719	0.230222	4.72233	2.33e-06	6.62e-05
ENSG00000172116-CD8B	CD8B	218.934	0.631675	0.141512	4.46375	8.05e-06	0.000199091
ENSG00000172965-MIR4435-2HG	MIR4435-2HG	84.733	0.946624	0.220686	4.28947	1.79e-05	0.000402112
ENSG00000170485-NPAS2	NPAS2	61.64	1.15578	0.270825	4.26763	1.98e-05	0.000433326
ENSG00000187764-SEMA4D	SEMA4D	78.9381	0.951617	0.227048	4.19126	2.77e-05	0.000584326
ENSG00000163349-HIPK1	HIPK1	84.596	0.947381	0.228486	4.14634	3.38e-05	0.00069379
ENSG00000164308-ERAP2	ERAP2	47.901	1.2151	0.296411	4.09939	4.14e-05	0.000825207
ENSG00000185811-IKZF1	IKZF1	208.434	0.558461	0.144002	3.87815	0.000105253	0.00186678
ENSG00000102445-RUBCNL	RUBCNL	184.746	0.584924	0.152165	3.84402	0.000121036	0.00209605
ENSG00000113916-BCL6	BCL6	73.8972	0.900765	0.235822	3.81968	0.000133627	0.00228917
ENSG00000137845-ADAM10	ADAM10	209.465	0.557364	0.146531	3.80373	0.000142535	0.00241575
ENSG00000145675-PIK3R1	PIK3R1	239.775	0.516482	0.138502	3.72905	0.000192204	0.00310324
ENSG00000115165-CYTIP	CYTIP	41.7931	1.12506	0.304256	3.69773	0.000217533	0.00343091
ENSG00000150867-PIP4K2A	PIP4K2A	79.131	0.867717	0.234735	3.69658	0.000218522	0.00343516
ENSG00000111913-RIPOR2	RIPOR2	42.5961	1.11153	0.311565	3.56756	0.000360319	0.00524681
ENSG00000107959-PITRM1	PITRM1	38.5434	1.15247	0.323486	3.56265	0.000367124	0.00531578
ENSG00000196352-CD55	CD55	38.0939	1.15462	0.329407	3.50514	0.000456372	0.00634796
ENSG00000104325-DECR1	DECR1	49.4359	1.03349	0.300071	3.44414	0.000572884	0.00763473
ENSG00000153094-BCL2L11	BCL2L11	20.6847	1.52085	0.450823	3.3735	0.00074219	0.00923335
ENSG00000106605-BLVRA	BLVRA	58.4921	0.867341	0.267486	3.24256	0.00118459	0.0135532
ENSG00000168675-LDLRAD4	LDLRAD4	185.099	0.473747	0.14795	3.20209	0.00136437	0.015103
ENSG00000104687-GSR	GSR	64.6398	0.791423	0.250153	3.16376	0.00155744	0.0168685
ENSG00000152495-CAMK4	CAMK4	86.0673	0.721545	0.233079	3.09571	0.00196339	0.0202636
ENSG00000285016-AC017002.6	AC017002.6	46.9617	0.875729	0.28531	3.0694	0.0021449	0.0217268
ENSG00000248508-SRP14-AS1	SRP14-AS1	19.9893	1.31809	0.452781	2.91109	0.00360168	0.0333016
ENSG00000163945-UVSSA	UVSSA	53.0163	0.783581	0.269435	2.90824	0.00363468	0.0335417
ENSG00000158321-AUTS2	AUTS2	76.1638	0.651347	0.232438	2.80224	0.00507489	0.0440624
ENSG00000169047-IRS1	IRS1	33.9398	0.967654	0.349579	2.76805	0.00563924	0.0475159
ENSG00000145349-CAMK2D	CAMK2D	15.7884	1.42889	0.520751	2.74391	0.00607128	0.0502447		not significant
ENSG00000115850-LCT	LCT	27.2653	1.10538	0.418618	2.64054	0.00827737	0.0641614
ENSG00000168807-SNTB2	SNTB2	66.3979	0.680576	0.258721	2.63054	0.00852482	0.0656361
ENSG00000134480-CCNH	CCNH	114.214	0.511233	0.195279	2.61796	0.00884561	0.0672013
ENSG00000181722-ZBTB20	ZBTB20	24.6032	1.09877	0.420822	2.61101	0.00902755	0.0682574
ENSG00000165959-CLMN	CLMN	56.7519	0.668642	0.262063	2.55146	0.0107274	0.0773116
ENSG00000001626-CFTR	CFTR	153.427	0.469155	0.184374	2.54458	0.010941	0.0782604
ENSG00000151240-DIP2C	DIP2C	15.5616	1.32508	0.521392	2.54143	0.01104	0.0786738
ENSG00000168772-CXXC4	CXXC4	31.9758	0.870203	0.353071	2.46467	0.013714	0.0920891
ENSG00000188878-FBF1	FBF1	13.6348	1.3065	0.543589	2.40347	0.0162401	0.103585
ENSG00000145982-FARS2	FARS2	55.8276	0.609577	0.259959	2.34489	0.0190325	0.116715
ENSG00000179588-ZFPM1	ZFPM1	14.6106	1.18656	0.519399	2.2845	0.0223424	0.130345
ENSG00000140538-NTRK3	NTRK3	18.3724	1.12768	0.493859	2.28341	0.0224062	0.130525
ENSG00000078304-PPP2R5C	PPP2R5C	364.453	0.252112	0.114328	2.20517	0.0274422	0.150231
ENSG00000146938-NLGN4X	NLGN4X	31.6628	0.746327	0.347109	2.15012	0.0315457	0.164956
ENSG00000071051-NCK2	NCK2	28.1342	0.848481	0.410223	2.06834	0.0386079	0.187098
ENSG00000154310-TNIK	TNIK	40.3389	0.681865	0.331064	2.05962	0.0394349	0.189755
ENSG00000109586-GALNT7	GALNT7	53.5677	0.600815	0.29357	2.04658	0.0406993	0.193692
ENSG00000167323-STIM1	STIM1	53.6321	0.555791	0.275468	2.01762	0.0436305	0.203575
ENSG00000169071-ROR2	ROR2	72.3369	0.463278	0.232799	1.99004	0.046587	0.211312
ENSG00000038532-CLEC16A	CLEC16A	32.4338	0.677081	0.34659	1.95355	0.0507544	0.22515
ENSG00000184178-SCFD2	SCFD2	34.2419	0.637239	0.328435	1.94023	0.0523519	0.229043
ENSG00000144218-AFF3	AFF3	41.3765	0.585843	0.308953	1.89622	0.057931	0.245107
ENSG00000165238-WNK2	WNK2	71.8875	0.433929	0.231154	1.87723	0.0604866	0.250941
ENSG00000137871-ZNF280D	ZNF280D	79.6753	0.425631	0.226814	1.87656	0.0605783	0.251212
ENSG00000175662-TOM1L2	TOM1L2	21.0033	0.787883	0.428307	1.83953	0.0658378	0.262526
ENSG00000187079-TEAD1	TEAD1	25.4054	0.71184	0.391395	1.81872	0.0689537	0.269213
ENSG00000272168-CASC15	CASC15	29.6877	0.639267	0.352683	1.81258	0.0698966	0.271499
ENSG00000253276-CCDC71L	CCDC71L	21.0188	0.785518	0.448647	1.75086	0.0799702	0.295766
ENSG00000132549-VPS13B	VPS13B	48.934	0.486449	0.281027	1.73097	0.0834569	0.303717
ENSG00000186566-GPATCH8	GPATCH8	228.191	0.23133	0.139454	1.65883	0.0971498	0.33453
ENSG00000011454-RABGAP1	RABGAP1	58.0408	0.417714	0.260238	1.60512	0.108467	0.354572
ENSG00000116704-SLC35D1	SLC35D1	32.2682	0.550467	0.35398	1.55508	0.119927	0.374581
ENSG00000285253-AC090517.4	AC090517.4	25.0772	0.610774	0.393316	1.55288	0.120451	0.375235
ENSG00000246859-STARD4-AS1	STARD4-AS1	33.8016	0.528705	0.341186	1.54961	0.121235	0.376082
ENSG00000222041-CYTOR	CYTOR	107.224	0.320721	0.208602	1.53748	0.124177	0.381241
ENSG00000164654-MIOS	MIOS	30.6005	0.566358	0.37031	1.52942	0.126161	0.385226
ENSG00000170471-RALGAPB	RALGAPB	44.1105	0.418687	0.293433	1.42685	0.153622	0.430652
ENSG00000082805-ERC1	ERC1	53.188	0.426097	0.3045	1.39933	0.161713	0.443792
ENSG00000120690-ELF1	ELF1	106.627	0.285979	0.20567	1.39047	0.164385	0.448594
ENSG00000180357-ZNF609	ZNF609	71.2063	0.313414	0.230083	1.36218	0.173142	0.460201
ENSG00000152936-LMNTD1	LMNTD1	14.2438	0.748723	0.566767	1.32104	0.186487	0.479768
ENSG00000198799-LRIG2	LRIG2	16.9393	0.625659	0.477674	1.3098	0.190262	0.484904
ENSG00000138640-FAM13A	FAM13A	16.0729	0.690251	0.527847	1.30767	0.190984	0.485131
ENSG00000157654-PALM2-AKAP2	PALM2-AKAP2	32.4734	0.453276	0.353589	1.28193	0.199867	0.494461
ENSG00000147044-CASK	CASK	38.4452	0.382225	0.313833	1.21792	0.223253	0.52457
ENSG00000108091-CCDC6	CCDC6	47.4233	0.33669	0.283978	1.18562	0.235771	0.539115
ENSG00000198793-MTOR	MTOR	52.2817	0.305338	0.266693	1.1449	0.252249	0.560634
ENSG00000057935-MTA3	MTA3	49.2594	0.315754	0.275968	1.14417	0.252554	0.560696
ENSG00000113552-GNPDA1	GNPDA1	64.1715	0.264277	0.247136	1.06936	0.284909	0.598478
ENSG00000278311-GGNBP2	GGNBP2	333.844	0.123133	0.118132	1.04233	0.297259	0.613633
ENSG00000160218-TRAPPC10	TRAPPC10	34.9775	0.342663	0.329084	1.04126	0.297755	0.61408
ENSG00000010072-SPRTN	SPRTN	27.0995	0.368901	0.368193	1.00192	0.316381	0.633179
ENSG00000103510-KAT8	KAT8	25.6807	0.37369	0.380923	0.981012	0.326587	0.641534
ENSG00000260192-LINC02240	LINC02240	39.619	0.399988	0.415936	0.961659	0.336221	0.651993
ENSG00000112699-GMDS	GMDS	34.1354	0.322964	0.338057	0.955353	0.339399	0.654736
ENSG00000172428-COPS9	COPS9	230.655	0.134231	0.147732	0.908612	0.363555	0.677936
ENSG00000130522-JUND	JUND	55.5219	0.239934	0.265364	0.904172	0.365904	0.678973
ENSG00000152127-MGAT5	MGAT5	38.3617	0.284329	0.316874	0.897293	0.369563	0.682964
ENSG00000150722-PPP1R1C	PPP1R1C	22.4857	0.366313	0.40882	0.896023	0.37024	0.683333
ENSG00000108774-RAB5C	RAB5C	152.106	0.152473	0.17247	0.884053	0.376667	0.689001
ENSG00000164190-NIPBL	NIPBL	288.031	0.109613	0.129722	0.844984	0.39812	0.70581
ENSG00000117020-AKT3	AKT3	39.8056	0.252403	0.305025	0.827481	0.407964	0.712966
ENSG00000103671-TRIP4	TRIP4	26.8842	0.310053	0.376394	0.823745	0.410084	0.714446
ENSG00000109381-ELF2	ELF2	30.1081	0.287679	0.353486	0.813836	0.415739	0.717679
ENSG00000082701-GSK3B	GSK3B	50.4573	0.225401	0.285958	0.788232	0.430561	0.727899
ENSG00000176124-DLEU1	DLEU1	49.3935	0.21197	0.276456	0.766741	0.443235	0.735242
ENSG00000197555-SIPA1L1	SIPA1L1	46.827	0.193968	0.28185	0.688197	0.491329	0.768111
ENSG00000145216-FIP1L1	FIP1L1	163.868	0.111676	0.166449	0.67093	0.502265	0.775113
ENSG00000179818-PCBP1-AS1	PCBP1-AS1	338.65	0.0831687	0.1258	0.661119	0.508536	0.779761
ENSG00000153827-TRIP12	TRIP12	183.535	0.0999772	0.154078	0.648873	0.516421	0.785643
ENSG00000160271-RALGDS	RALGDS	13.2306	0.323364	0.525181	0.615719	0.53808	0.79974
ENSG00000175449-RFESD	RFESD	16.7748	0.294802	0.480135	0.613998	0.539216	0.800216
ENSG00000198846-TOX	TOX	73.4376	0.150419	0.251983	0.596943	0.550545	0.805916
ENSG00000131149-GSE1	GSE1	355.105	0.0618636	0.118651	0.521391	0.602094	0.834892
ENSG00000206557-TRIM71	TRIM71	15.3443	0.243677	0.512196	0.47575	0.634253	0.851662
ENSG00000144451-SPAG16	SPAG16	51.4108	0.117475	0.269054	0.43662	0.662387	0.868052
ENSG00000163904-SENP2	SENP2	38.1369	0.131485	0.31327	0.419718	0.674692	0.874597
ENSG00000101126-ADNP	ADNP	85.4815	0.0988916	0.23883	0.414066	0.678826	0.876384
ENSG00000189283-FHIT	FHIT	25.5408	0.156064	0.382621	0.407883	0.68336	0.878908
ENSG00000153250-RBMS1	RBMS1	96.6754	0.0720222	0.210679	0.341858	0.732458	0.900756
ENSG00000136231-IGF2BP3	IGF2BP3	74.5996	0.0834168	0.247043	0.337661	0.735619	0.901525
ENSG00000177666-PNPLA2	PNPLA2	27.3897	0.12115	0.364352	0.332508	0.739505	0.902717
ENSG00000152270-PDE3B	PDE3B	35.2842	0.106336	0.32281	0.329408	0.741848	0.903506
ENSG00000154229-PRKCA	PRKCA	47.9777	0.0915153	0.289219	0.316422	0.751682	0.907344
ENSG00000179889-PDXDC1	PDXDC1	101.466	0.0662208	0.211709	0.312792	0.754439	0.908373
ENSG00000196839-ADA	ADA	571.154	0.0295199	0.0987196	0.299028	0.764918	0.912389
ENSG00000168036-CTNNB1	CTNNB1	57.055	0.0780369	0.270586	0.2884	0.773041	0.916431
ENSG00000102781-KATNAL1	KATNAL1	22.2833	0.124453	0.44348	0.280627	0.778996	0.919152
ENSG00000116128-BCL9	BCL9	17.0158	0.129137	0.464467	0.278032	0.780988	0.920321
ENSG00000145819-ARHGAP26	ARHGAP26	20.468	0.12052	0.441532	0.272959	0.784884	0.921882
ENSG00000229140-CCDC26	CCDC26	47.6197	0.0781625	0.293583	0.266237	0.790057	0.92381
ENSG00000178562-CD28	CD28	46.7053	0.0711643	0.291124	0.244447	0.806885	0.932491
ENSG00000155592-ZKSCAN2	ZKSCAN2	14.7413	0.119845	0.495344	0.241942	0.808825	0.933654
ENSG00000166734-CASC4	CASC4	45.2803	0.0684434	0.297302	0.230215	0.817925	0.93672
ENSG00000198382-UVRAG	UVRAG	29.2528	0.0475438	0.359475	0.132259	0.89478	0.960841
ENSG00000284879-AC133644.3	AC133644.3	20.8188	0.0383986	0.417343	0.0920071	0.926692	0.973736
ENSG00000136425-CIB2	CIB2	27.738	0.0181693	0.37481	0.048476	0.961337	0.988585
ENSG00000166352-C11orf74	C11orf74	7.2128	0.00374452	0.74379	0.00503438	0.995983	NA
ENSG00000109738-GLRB	GLRB	4.23374	0.046433	0.926204	0.0501326	0.960017	NA
ENSG00000180815-MAP3K15	MAP3K15	7.22218	0.0500596	0.754858	0.0663165	0.947126	NA
ENSG00000124496-TRERF1	TRERF1	12.9619	0.101926	0.574996	0.177264	0.859301	NA
ENSG00000182732-RGS6	RGS6	1.88357	0.129909	1.38606	0.093725	0.925328	NA
ENSG00000234902-AC007879.3	AC007879.3	0.282102	0.139427	3.54808	0.0392966	0.968654	NA
ENSG00000256742-AC145422.1	AC145422.1	0.282102	0.139427	3.54808	0.0392966	0.968654	NA
ENSG00000250131-AC078881.1	AC078881.1	0.283313	0.139427	3.54255	0.0393579	0.968605	NA
ENSG00000184194-GPR173	GPR173	0.291251	0.139428	3.5072	0.0397547	0.968289	NA
ENSG00000227932-SELENOOLP	SELENOOLP	0.292462	0.139428	3.50194	0.0398144	0.968241	NA
ENSG00000027001-MIPEP	MIPEP	7.20451	0.169449	0.739564	0.229121	0.818775	NA
ENSG00000127580-WDR24	WDR24	10.7592	0.199985	0.58917	0.339435	0.734282	NA
ENSG00000278996-FP671120.1	FP671120.1	9.28979	0.202708	0.624283	0.324705	0.745405	NA
ENSG00000136603-SKIL	SKIL	11.7571	0.212391	0.567163	0.374479	0.708048	NA
ENSG00000143772-ITPKB	ITPKB	6.04217	0.225723	0.923515	0.244417	0.806908	NA
ENSG00000168916-ZNF608	ZNF608	1.30014	0.226379	1.66694	0.135805	0.891976	NA
ENSG00000164808-SPIDR	SPIDR	9.05094	0.232516	0.689137	0.337402	0.735814	NA
ENSG00000283128-AC009403.2	AC009403.2	8.65474	0.234689	0.652084	0.359906	0.718917	NA
ENSG00000148219-ASTN2	ASTN2	3.37775	0.235826	1.1343	0.207904	0.835304	NA
ENSG00000153930-ANKFN1	ANKFN1	8.14502	0.313278	0.672599	0.465772	0.641379	NA
ENSG00000253926-AC011257.1	AC011257.1	2.64126	0.365679	1.1857	0.308407	0.757773	NA
ENSG00000272657-AP000317.2	AP000317.2	3.1513	0.405168	1.07615	0.376498	0.706547	NA
ENSG00000169372-CRADD	CRADD	12.2082	0.406853	0.58928	0.690424	0.489928	NA
ENSG00000173068-BNC2	BNC2	5.32737	0.43077	0.842565	0.51126	0.609169	NA
ENSG00000280441-FP236383.1	FP236383.1	10.0963	0.431024	0.613356	0.70273	0.482224	NA
ENSG00000196284-SUPT3H	SUPT3H	10.9164	0.439787	0.598536	0.734772	0.462478	NA
ENSG00000177628-GBA	GBA	11.1152	0.4664	0.567181	0.822312	0.410899	NA
ENSG00000170369-CST2	CST2	0.70084	0.532797	2.37185	0.224633	0.822265	NA
ENSG00000011566-MAP4K3	MAP4K3	8.80337	0.549549	0.638809	0.860272	0.389639	NA
ENSG00000075240-GRAMD4	GRAMD4	6.57526	0.569511	0.835743	0.681443	0.495591	NA
ENSG00000171813-PWWP2B	PWWP2B	7.69754	0.575999	0.708016	0.81354	0.415908	NA
ENSG00000070614-NDST1	NDST1	8.94029	0.588639	0.641796	0.917174	0.359052	NA
ENSG00000182162-P2RY8	P2RY8	13.0926	0.601069	0.573124	1.04876	0.294289	NA
ENSG00000235492-LINC01221	LINC01221	3.60409	0.624819	1.00654	0.620762	0.534756	NA
ENSG00000116903-EXOC8	EXOC8	10.9485	0.629275	0.621571	1.01239	0.311349	NA
ENSG00000156671-SAMD8	SAMD8	5.91808	0.751174	0.791246	0.949355	0.34244	NA
ENSG00000236489-AC133473.1	AC133473.1	1.32027	0.754584	1.75604	0.429707	0.667408	NA
ENSG00000228956-SATB1-AS1	SATB1-AS1	12.1305	0.845513	0.567124	1.49088	0.135993	NA
ENSG00000256235-SMIM3	SMIM3	7.34641	0.906373	0.718795	1.26096	0.207323	NA
ENSG00000174564-IL20RB	IL20RB	11.112	0.932881	0.587251	1.58856	0.112161	NA
ENSG00000232871-SEC1P	SEC1P	5.19061	0.954458	0.878301	1.08671	0.277165	NA
ENSG00000120129-DUSP1	DUSP1	7.31507	0.96023	0.737499	1.30201	0.192914	NA
ENSG00000168890-TMEM150A	TMEM150A	3.89828	0.960264	1.01681	0.944391	0.34497	NA
ENSG00000123201-GUCY1B2	GUCY1B2	1.84156	1.05454	1.4937	0.705993	0.480192	NA
ENSG00000229980-TOB1-AS1	TOB1-AS1	4.44645	1.05678	0.937921	1.12672	0.259859	NA
ENSG00000230379-AP000146.1	AP000146.1	2.0125	1.09371	1.40148	0.780394	0.435159	NA
ENSG00000107242-PIP5K1B	PIP5K1B	0.134214	1.1012	4.08047	0.26987	0.78726	NA
ENSG00000150556-LYPD6B	LYPD6B	0.135425	1.1012	4.08047	0.26987	0.78726	NA
ENSG00000157303-SUSD3	SUSD3	0.134214	1.1012	4.08047	0.26987	0.78726	NA
ENSG00000218052-ADAMTS7P4	ADAMTS7P4	0.135425	1.1012	4.08047	0.26987	0.78726	NA
ENSG00000236076-LINC01072	LINC01072	0.135425	1.1012	4.08047	0.26987	0.78726	NA
ENSG00000243444-PALM2	PALM2	0.134214	1.1012	4.08047	0.26987	0.78726	NA
ENSG00000243797-AC004917.1	AC004917.1	0.134214	1.1012	4.08047	0.26987	0.78726	NA
ENSG00000244436-AC023050.1	AC023050.1	0.135425	1.1012	4.08047	0.26987	0.78726	NA
ENSG00000279149-AL356750.1	AL356750.1	0.135425	1.1012	4.08047	0.26987	0.78726	NA
ENSG00000138395-CDK15	CDK15	0.283284	1.1012	3.84529	0.286377	0.77459	NA
ENSG00000200816-SNORA38	SNORA38	0.283284	1.1012	3.84529	0.286377	0.77459	NA
ENSG00000272911-AC005696.3	AC005696.3	0.283284	1.1012	3.84529	0.286377	0.77459	NA
ENSG00000152582-SPEF2	SPEF2	2.00456	1.10432	1.35792	0.813242	0.416079	NA
ENSG00000136250-AOAH	AOAH	0.583401	1.15367	2.59148	0.445179	0.65619	NA
ENSG00000133477-FAM83F	FAM83F	6.97083	1.16937	0.767271	1.52407	0.127492	NA
ENSG00000247121-AC009126.1	AC009126.1	2.94654	1.21935	1.18499	1.029	0.303482	NA
ENSG00000109944-JHY	JHY	2.11955	1.27371	1.35647	0.93899	0.347736	NA
ENSG00000268257-AIRN	AIRN	2.12242	1.30091	1.37124	0.948707	0.342769	NA
ENSG00000183049-CAMK1D	CAMK1D	7.53536	1.30481	0.850507	1.53416	0.124991	NA
ENSG00000214301-AC022296.1	AC022296.1	0.552951	1.36377	2.58709	0.527143	0.598094	NA
ENSG00000146376-ARHGAP18	ARHGAP18	5.0842	1.39558	0.88673	1.57385	0.115522	NA
ENSG00000238121-LINC00426	LINC00426	6.94148	1.44916	0.769619	1.88296	0.0597062	NA
ENSG00000140009-ESR2	ESR2	10.2851	1.45859	0.656142	2.22298	0.026217	NA
ENSG00000131242-RAB11FIP4	RAB11FIP4	3.49602	1.52449	1.12685	1.35288	0.176093	NA
ENSG00000138696-BMPR1B	BMPR1B	5.17363	1.5261	0.951269	1.60427	0.108654	NA
ENSG00000008513-ST3GAL1	ST3GAL1	5.45671	1.60145	0.904948	1.76966	0.0767845	NA
ENSG00000132170-PPARG	PPARG	9.21926	1.65491	0.700233	2.36337	0.0181094	NA
ENSG00000135898-GPR55	GPR55	1.25692	1.68779	1.82813	0.92323	0.355887	NA
ENSG00000245384-CXXC4-AS1	CXXC4-AS1	1.23891	1.72217	1.91597	0.898849	0.368733	NA
ENSG00000165338-HECTD2	HECTD2	8.66596	1.78571	0.73087	2.44327	0.0145549	NA
ENSG00000225916-AC007879.2	AC007879.2	0.268427	1.82361	3.88298	0.469642	0.638611	NA
ENSG00000262766-AC135050.5	AC135050.5	0.268427	1.82361	3.88298	0.469642	0.638611	NA
ENSG00000275950-MIR6724-1	MIR6724-1	0.268427	1.82361	3.88298	0.469642	0.638611	NA
ENSG00000228543-AC003684.1	AC003684.1	0.269638	1.83115	3.55428	0.515197	0.606416	NA
ENSG00000233916-ZDHHC20P1	ZDHHC20P1	0.269638	1.83115	3.55428	0.515197	0.606416	NA
ENSG00000255021-AC093496.1	AC093496.1	0.270849	1.83226	3.8693	0.473538	0.635829	NA
ENSG00000223631-LINC01120	LINC01120	7.16151	1.84685	0.784458	2.3543	0.0185579	NA
ENSG00000257242-LINC01619	LINC01619	2.96899	1.87652	1.18274	1.58659	0.112606	NA
ENSG00000124813-RUNX2	RUNX2	5.06035	1.87919	0.926508	2.02825	0.0425342	NA
ENSG00000270174-AL022097.1	AL022097.1	0.853039	2.00254	2.14268	0.934595	0.349997	NA
ENSG00000196167-COLCA1	COLCA1	1.52219	2.03498	1.71959	1.18341	0.236648	NA
ENSG00000109339-MAPK10	MAPK10	4.71787	2.07507	0.999826	2.07543	0.0379462	NA
ENSG00000084731-KIF3C	KIF3C	7.61807	2.10181	0.781893	2.6881	0.00718601	NA
ENSG00000181804-SLC9A9	SLC9A9	4.04141	2.10853	1.09554	1.92465	0.0542733	NA
ENSG00000263033-AC007220.1	AC007220.1	0.417498	2.15143	3.04368	0.706852	0.479658	NA
ENSG00000100100-PIK3IP1	PIK3IP1	3.33547	2.17636	1.17308	1.85524	0.0635616	NA
ENSG00000213981-AC007277.1	AC007277.1	0.994455	2.21247	2.159	1.02477	0.305474	NA
ENSG00000125675-GRIA3	GRIA3	2.65073	2.253	1.33344	1.68961	0.0911032	NA
ENSG00000261659-Z92544.2	Z92544.2	0.97166	2.2858	2.05601	1.11176	0.266239	NA
ENSG00000139132-FGD4	FGD4	4.62348	2.29262	1.03767	2.20939	0.0271477	NA
ENSG00000223561-AC005165.1	AC005165.1	0.406274	2.29399	3.29882	0.695397	0.486806	NA
ENSG00000054392-HHAT	HHAT	3.77118	2.34517	1.12482	2.08494	0.0370747	NA
ENSG00000110436-SLC1A2	SLC1A2	0.566569	2.56767	2.94928	0.870608	0.383968	NA
ENSG00000273167-AL359736.1	AL359736.1	9.09012	2.62428	0.759057	3.45728	0.00054565	NA
ENSG00000165695-AK8	AK8	0.539276	2.71326	2.70321	1.00371	0.315516	NA
ENSG00000141469-SLC14A1	SLC14A1	1.24324	2.7605	1.97164	1.40011	0.161482	NA
ENSG00000156414-TDRD9	TDRD9	0.700782	2.90397	2.53268	1.1466	0.251547	NA
ENSG00000164199-ADGRV1	ADGRV1	0.685925	2.96977	2.52339	1.1769	0.239236	NA
ENSG00000109906-ZBTB16	ZBTB16	0.67349	3.03316	2.49077	1.21776	0.223314	NA
ENSG00000141449-GREB1L	GREB1L	7.98516	3.24335	0.882365	3.67575	0.000237153	NA
ENSG00000139173-TMEM117	TMEM117	1.77815	3.31766	1.72123	1.92749	0.0539186	NA
ENSG00000133980-VRTN	VRTN	0.944339	3.51931	2.21227	1.59081	0.111652	NA
ENSG00000168016-TRANK1	TRANK1	6.34725	3.6602	1.06722	3.42964	0.000604378	NA
ENSG00000182489-XKRX	XKRX	1.23885	3.80906	1.95799	1.9454	0.0517274	NA
ENSG00000053108-FSTL4	FSTL4	1.36184	4.00755	1.87539	2.13692	0.0326045	NA
ENSG00000251095-AC097478.1	AC097478.1	1.36184	4.00755	1.87539	2.13692	0.0326045	NA
ENSG00000163673-DCLK3	DCLK3	6.58733	4.3519	1.21416	3.58431	0.000337975	NA
ENSG00000042832-TG	TG	4.99071	4.80333	1.40577	3.41686	0.000633473	NA
ENSG00000083067-TRPM3	TRPM3	0	NA	NA	NA	NA	NA
ENSG00000106952-TNFSF8	TNFSF8	0	NA	NA	NA	NA	NA
ENSG00000115594-IL1R1	IL1R1	0	NA	NA	NA	NA	NA
ENSG00000124721-DNAH8	DNAH8	0	NA	NA	NA	NA	NA
ENSG00000130340-SNX9	SNX9	0	NA	NA	NA	NA	NA
ENSG00000145794-MEGF10	MEGF10	0	NA	NA	NA	NA	NA
ENSG00000146910-CNPY1	CNPY1	0	NA	NA	NA	NA	NA
ENSG00000152208-GRID2	GRID2	0	NA	NA	NA	NA	NA
ENSG00000153162-BMP6	BMP6	0	NA	NA	NA	NA	NA
ENSG00000164303-ENPP6	ENPP6	0	NA	NA	NA	NA	NA
ENSG00000168412-MTNR1A	MTNR1A	0	NA	NA	NA	NA	NA
ENSG00000169946-ZFPM2	ZFPM2	0	NA	NA	NA	NA	NA
ENSG00000172572-PDE3A	PDE3A	0	NA	NA	NA	NA	NA
ENSG00000186205-36951	36951	0	NA	NA	NA	NA	NA
ENSG00000188681-TEKT4P2	TEKT4P2	0	NA	NA	NA	NA	NA
ENSG00000197585-AC068051.1	AC068051.1	0	NA	NA	NA	NA	NA
ENSG00000197702-PARVA	PARVA	0	NA	NA	NA	NA	NA
ENSG00000198010-DLGAP2	DLGAP2	0	NA	NA	NA	NA	NA
ENSG00000202300-RNU6-487P	RNU6-487P	0	NA	NA	NA	NA	NA
ENSG00000214290-COLCA2	COLCA2	0	NA	NA	NA	NA	NA
ENSG00000223725-AC009226.1	AC009226.1	0	NA	NA	NA	NA	NA
ENSG00000223956-LINC01767	LINC01767	0	NA	NA	NA	NA	NA
ENSG00000224711-LINC01706	LINC01706	0	NA	NA	NA	NA	NA
ENSG00000226983-LINC01692	LINC01692	0	NA	NA	NA	NA	NA
ENSG00000228162-AC097713.1	AC097713.1	0	NA	NA	NA	NA	NA
ENSG00000228741-SPATA13	SPATA13	0	NA	NA	NA	NA	NA
ENSG00000229647-MYOSLID	MYOSLID	0	NA	NA	NA	NA	NA
ENSG00000229785-SLC25A38P1	SLC25A38P1	0	NA	NA	NA	NA	NA
ENSG00000232056-AC092687.1	AC092687.1	0	NA	NA	NA	NA	NA
ENSG00000236324-AL035634.1	AL035634.1	0	NA	NA	NA	NA	NA
ENSG00000237435-AC099566.1	AC099566.1	0	NA	NA	NA	NA	NA
ENSG00000239268-AC092691.1	AC092691.1	0	NA	NA	NA	NA	NA
ENSG00000241183-AC009022.1	AC009022.1	0	NA	NA	NA	NA	NA
ENSG00000243193-AC006387.1	AC006387.1	0	NA	NA	NA	NA	NA
ENSG00000248506-AC097474.1	AC097474.1	0	NA	NA	NA	NA	NA
ENSG00000248969-AC137810.1	AC137810.1	0	NA	NA	NA	NA	NA
ENSG00000249407-IL20RB-AS1	IL20RB-AS1	0	NA	NA	NA	NA	NA
ENSG00000250101-AC106795.3	AC106795.3	0	NA	NA	NA	NA	NA
ENSG00000250532-AC021180.1	AC021180.1	0	NA	NA	NA	NA	NA
ENSG00000253736-AC022217.3	AC022217.3	0	NA	NA	NA	NA	NA
ENSG00000257009-AC022367.1	AC022367.1	0	NA	NA	NA	NA	NA
ENSG00000259989-AC135782.2	AC135782.2	0	NA	NA	NA	NA	NA
ENSG00000260511-AC009145.2	AC009145.2	0	NA	NA	NA	NA	NA
ENSG00000262006-AC005920.4	AC005920.4	0	NA	NA	NA	NA	NA
ENSG00000264765-AC098850.2	AC098850.2	0	NA	NA	NA	NA	NA
ENSG00000266602-AC008109.1	AC008109.1	0	NA	NA	NA	NA	NA
ENSG00000267193-AC023421.2	AC023421.2	0	NA	NA	NA	NA	NA
ENSG00000267959-MIR3188	MIR3188	0	NA	NA	NA	NA	NA
ENSG00000272297-AC018709.1	AC018709.1	0	NA	NA	NA	NA	NA
ENSG00000274468-AL512638.2	AL512638.2	0	NA	NA	NA	NA	NA
ENSG00000279727-LINC02033	LINC02033	0	NA	NA	NA	NA	NA
ENSG00000280013-CU639417.3	CU639417.3	0	NA	NA	NA	NA	NA
ENSG00000283573-AL157371.2	AL157371.2	0	NA	NA	NA	NA	NA
ENSG00000285245-AL162417.1	AL162417.1	0	NA	NA	NA	NA	NA
